# Supplementary material for: RNA translational regulation by CPEB4 orchestrates platelet function and pathophysiology
Source: Research Square preprint supplement (doi:10.21203/rs.3.rs-5588659/v1), 2025-01-15
Supplement: Supplementary file 1 [file 8d2e3bbdd22ca6c9177a94a0.xlsx]

## Sheet: DE_CPEB4 targets_Resting 
SYMBOL	CPE prediction
Fgg	ACTIVATION
Cd47	ACTIVATION
Dsg1c	REPRESSION
Pter	REPRESSION
Baz2a	ACTIVATION/REPRESSION
Prpf39	REPRESSION
Apon	REPRESSION
Smim15	REPRESSION
Rpl13a	ACTIVATION
Syvn1	ACTIVATION
Wipf3	ACTIVATION
Mbnl2	REPRESSION
Reln	REPRESSION
Pf4	ACTIVATION
Rhobtb3	ACTIVATION/REPRESSION
Ganc	REPRESSION
Hnrnpu	REPRESSION
Slc35a3	ACTIVATION/REPRESSION
Slc29a1	ACTIVATION/REPRESSION
Ddx3y	REPRESSION
Gypa	ACTIVATION/REPRESSION
Snx18	ACTIVATION/REPRESSION
Gga2	REPRESSION
Rhag	ACTIVATION/REPRESSION
Triqk	ACTIVATION
Cd44	ACTIVATION/REPRESSION
Myl1	ACTIVATION/REPRESSION
Acp1	REPRESSION
Prpf19	ACTIVATION/REPRESSION
Peg10	REPRESSION
Add2	REPRESSION
Gnpda1	ACTIVATION
Spta1	REPRESSION
Ddx5	REPRESSION
Ank1	REPRESSION
Itgal	ACTIVATION
Cdkn2c	ACTIVATION/REPRESSION
Reep3	ACTIVATION/REPRESSION
Anp32a	ACTIVATION/REPRESSION
Dcun1d2	REPRESSION
Pyurf	REPRESSION
Serinc3	REPRESSION
Scrn3	ACTIVATION
Cep290	ACTIVATION
Tmpo	ACTIVATION/REPRESSION
Daam2	ACTIVATION
Syne3	REPRESSION
Lin7c	REPRESSION
Ap3s2	REPRESSION
Palld	ACTIVATION
Cd36	REPRESSION
Nup54	ACTIVATION/REPRESSION
Cpeb4	REPRESSION
Lima1	ACTIVATION/REPRESSION
Pcbp2	REPRESSION
Kbtbd7	ACTIVATION
Prmt1	ACTIVATION/REPRESSION
Tgs1	REPRESSION
Oat	ACTIVATION
Tmem68	REPRESSION
Rbms1	REPRESSION
Arhgef12	REPRESSION
Cpeb2	REPRESSION
Rpia	REPRESSION
Dkk1	ACTIVATION
Olr1	REPRESSION
Llgl1	ACTIVATION/REPRESSION
Efnb1	REPRESSION
Marcks	REPRESSION
Slc44a1	ACTIVATION
Slain2	REPRESSION
Phlda1	REPRESSION
Txnip	ACTIVATION
Ints7	ACTIVATION
Narf	REPRESSION
Pdcl3	REPRESSION
Hbs1l	ACTIVATION/REPRESSION
Cep170	ACTIVATION/REPRESSION
Cmas	ACTIVATION
Nucks1	ACTIVATION/REPRESSION
Flt1	REPRESSION
Fhl2	ACTIVATION
Ptma	REPRESSION
Sema6d	REPRESSION
Tbc1d2b	ACTIVATION/REPRESSION
S100a10	ACTIVATION/REPRESSION
Dlg4	REPRESSION
Ccnd1	REPRESSION
Anxa1	ACTIVATION
Cdkn1b	REPRESSION
Abhd5	REPRESSION
