# Supplementary material for: RNA translational regulation by CPEB4 orchestrates platelet function and pathophysiology
Source: Research Square preprint supplement (doi:10.21203/rs.3.rs-5588659/v1), 2025-01-15
Supplement: Supplementary file 2 [file c632da9de224fe2923583d25.xlsx]

## Sheet: GO_CPEB_DE_KOvsWT resting
Term	Overlap	P_value	AdjP_value	Odds_Ratio	Combined Score	Proteins	Regulation
7-Methylguanosine Cap Hypermethylation (GO:0036261)	2/7	0.000272696	0.0521608	112.237	921.143	SNRPD2;TGS1	UpRegulated
RNA Capping (GO:0036260)	2/7	0.000272696	0.0521608	112.237	921.143	SNRPD2;TGS1	UpRegulated
UDP-N-acetylglucosamine Biosynthetic Process (GO:0006048)	2/8	0.000362736	0.0521608	93.5258	740.896	GNPDA1;UAP1	UpRegulated
Amino Sugar Biosynthetic Process (GO:0046349)	2/9	0.000465274	0.0521608	80.161	615.066	GNPDA1;UAP1	UpRegulated
Intestinal Cholesterol Absorption (GO:0030299)	2/9	0.000465274	0.0521608	80.161	615.066	LIMA1;CD36	UpRegulated
UDP-N-acetylglucosamine Metabolic Process (GO:0006047)	2/10	0.000580219	0.0521608	70.1373	522.671	GNPDA1;UAP1	UpRegulated
Intestinal Lipid Absorption (GO:0098856)	2/11	0.000707483	0.0521608	62.3412	452.21	LIMA1;CD36	UpRegulated
NADPH Regeneration (GO:0006740)	2/12	0.000846976	0.0528383	56.1042	396.872	RPIA;NNT	UpRegulated
Nucleotide-Sugar Biosynthetic Process (GO:0009226)	2/15	0.00133795	0.0638279	43.1506	285.511	GNPDA1;UAP1	UpRegulated
Cellular Response To Corticosteroid Stimulus (GO:0071384)	2/15	0.00133795	0.0638279	43.1506	285.511	ANXA1;HNRNPU	UpRegulated
Spliceosomal snRNP Assembly (GO:0000387)	3/37	0.000331563	0.0521608	25.0752	200.895	SNRPD2;TGS1;PRPF19	UpRegulated
Positive Regulation Of Cell-Cell Adhesion (GO:0022409)	3/46	0.0006327	0.0521608	19.8179	145.969	ANK3;CD47;CD44	UpRegulated
Nucleocytoplasmic Transport (GO:0006913)	3/50	0.000808433	0.0528383	18.1277	129.076	CDKN1B;ANP32A;NUP54	UpRegulated
Regulation Of Cyclin-Dependent Protein Kinase Activity (GO:1904029)	3/53	0.000958704	0.0555363	17.0374	118.409	CDKN1B;CDKN2C;CCND1	UpRegulated
Axonogenesis (GO:0007409)	5/188	0.000623081	0.0521608	7.93314	58.5532	EFNB1;PALLD;SEMA6D;ANK3;LLGL1	UpRegulated
Protein Localization To Membrane (GO:0072657)	5/192	0.000685268	0.0521608	7.76187	56.5507	NUP54;ANK3;SYNE3;ANK1;S100A10	UpRegulated
mRNA Splicing, Via Spliceosome (GO:0000398)	5/211	0.00104622	0.0565655	7.03919	48.307	DDX5;SNRPD2;TGS1;HNRNPU;PRPF19	UpRegulated
Vesicle-Mediated Transport (GO:0016192)	4/411	0.00134799	0.0467753	9.61622	63.5549	SNX18;MYL1;WIPF3;AP3S2	DownRegualted
Protein Transport (GO:0015031)	4/313	0.000488253	0.0444887	12.7294	97.0579	GGA2;SNX18;FGG;CEP290	DownRegualted
Regulation Of Neurotransmitter Receptor Activity (GO:0099601)	2/42	0.00115388	0.0444887	45.3091	306.499	RELN;DLG4	DownRegualted
Establishment Or Maintenance Of Epithelial Cell Apical/Basal Polarity (GO:0045197)	2/40	0.00104686	0.0444887	47.6986	327.306	DLG4;LIN7C	DownRegualted
Regulation Of Protein Tyrosine Kinase Activity (GO:0061097)	2/39	0.000995247	0.0444887	48.9902	338.646	RELN;DLG4	DownRegualted
Positive Regulation Of Intracellular Transport (GO:0032388)	2/39	0.000995247	0.0444887	48.9902	338.646	MYL1;CEP290	DownRegualted
Positive Regulation Of Protein Tyrosine Kinase Activity (GO:0061098)	2/38	0.0009449	0.0444887	50.3535	350.684	RELN;DLG4	DownRegualted
Modulation Of Excitatory Postsynaptic Potential (GO:0098815)	2/31	0.000628216	0.0444887	62.5298	461.009	RELN;DLG4	DownRegualted
Positive Regulation Of Excitatory Postsynaptic Potential (GO:2000463)	2/22	0.000314145	0.0444887	90.7091	731.628	RELN;DLG4	DownRegualted
Regulation Of NMDA Receptor Activity (GO:2000310)	2/16	0.000163911	0.0444887	129.623	1129.82	RELN;DLG4	DownRegualted
