# Supplementary material for: RNA translational regulation by CPEB4 orchestrates platelet function and pathophysiology
Source: Research Square preprint supplement (doi:10.21203/rs.3.rs-5588659/v1), 2025-01-15
Supplement: Supplementary file 3 [file d06373c86bd536485308aed8.xlsx]

## Sheet: Proteomics
Protein_names	Gene_names	Cbpe4 Target	Fasta_headers	KO_vs_WT_logFC	KO_vs_WT_pval	KO+Thr_vs_WT+Thr_logFC	KO+Thr_vs_WT+Thr_pval	KO+Thr/KO vs WT+Thr/WT	WT+Thr-_vs_WT_logFC	WT+Thr-_vs_WT_pval	KO+Thr_vs_KO_logFC	KO+Thr_vs_KO_pval			209	Lims1	Degraded in wt. Impaired in ko
Zinc finger ZZ-type and EF-hand domain-containing protein 1	Zzef1	YES	tr|A0A140LJ04|A0A140LJ04_MOUSE Zinc finger ZZ-type and EF-hand domain-containing protein 1 OS=Mus musculus OX=10090 GN=Zzef1 PE=1 SV=1;tr|E9Q5W5|E9Q5W5_MOUSE Zinc finger ZZ-type and EF-hand domain-containing protein 1 OS=Mus musculus OX=10090 GN=Zzef1 PE=1	-0.0256716	0.354873	0.0306943	0.274977	0.0563659	-0.0253357	0.36081	0.0310301	0.270213
Zyxin	Zyx	NO	sp|Q62523|ZYX_MOUSE Zyxin OS=Mus musculus OX=10090 GN=Zyx PE=1 SV=2;tr|Q7TQE2|Q7TQE2_MOUSE Zyx protein OS=Mus musculus OX=10090 GN=Zyx PE=1 SV=1	0.0637379	0.16566	0.289601	0.000216658	0.225863	-0.820888	2.29565e-07	-0.595025	2.02289e-06
Protein zyg-11 homolog B	Zyg11b	YES	sp|Q3UFS0|ZY11B_MOUSE Protein zyg-11 homolog B OS=Mus musculus OX=10090 GN=Zyg11b PE=1 SV=2	0.0516088	0.477298	0.0463152	0.52209	-0.00529352	0.194503	0.0257096	0.18921	0.0286993
Zinc finger protein ZXDC	Zxdc	YES	sp|Q8C8V1|ZXDC_MOUSE Zinc finger protein ZXDC OS=Mus musculus OX=10090 GN=Zxdc PE=2 SV=1	0.189258	0.126003	1.93574	5.00821e-07	1.74648	1.09557	2.23049e-05	2.84205	3.65443e-08
ZW10 interactor	Zwint	NO	sp|Q9CQU5|ZWINT_MOUSE ZW10 interactor OS=Mus musculus OX=10090 GN=Zwint PE=1 SV=1	0.0906301	0.192604	0.163851	0.03532	0.0732212	-0.296382	0.00223267	-0.223161	0.009489
Protein zwilch homolog	Zwilch	NO	tr|H3BJ52|H3BJ52_MOUSE Protein zwilch homolog OS=Mus musculus OX=10090 GN=Zwilch PE=1 SV=1;tr|G3X9Z0|G3X9Z0_MOUSE Protein zwilch homolog OS=Mus musculus OX=10090 GN=Zwilch PE=1 SV=1;sp|Q8R060|ZWILC_MOUSE Protein zwilch homolog OS=Mus musculus OX=10090 GN=Z	0.0892463	0.188256	0.0415013	0.51931	-0.047745	-0.059112	0.366198	-0.106857	0.124534
Centromere/kinetochore protein zw10 homolog	Zw10	NO	sp|O54692|ZW10_MOUSE Centromere/kinetochore protein zw10 homolog OS=Mus musculus OX=10090 GN=Zw10 PE=1 SV=3	-0.0154262	0.588917	-0.0283616	0.33263	-0.0129353	0.00715452	0.800385	-0.00578081	0.837983
Zinc finger SWIM domain-containing protein 8	Zswim8	NO	sp|Q3UHH1|ZSWM8_MOUSE Zinc finger SWIM domain-containing protein 8 OS=Mus musculus OX=10090 GN=Zswim8 PE=1 SV=1	0.0686833	0.75455	-0.0642259	0.769911	-0.132909	0.328631	0.164064	0.195722	0.385113
Zinc finger SWIM domain-containing protein 6	Zswim6	YES	sp|Q80TB7|ZSWM6_MOUSE Zinc finger SWIM domain-containing protein 6 OS=Mus musculus OX=10090 GN=Zswim6 PE=1 SV=3	0.26368	0.00261066	0.0337807	0.575482	-0.229899	0.216211	0.00723871	-0.0136885	0.818701
Ubiquitin thioesterase Zranb1	Zranb1	YES	tr|A0A1L1SQ24|A0A1L1SQ24_MOUSE Ubiquitin thioesterase Zranb1 OS=Mus musculus OX=10090 GN=Zranb1 PE=1 SV=1;sp|Q7M760|ZRAN1_MOUSE Ubiquitin thioesterase Zranb1 OS=Mus musculus OX=10090 GN=Zranb1 PE=2 SV=1	0.144689	0.0435181	-0.0855009	0.188929	-0.23019	-0.120364	0.0798812	-0.350553	0.000584382
Zinc finger protein ZPR1	Zpr1	YES	sp|Q62384|ZPR1_MOUSE Zinc finger protein ZPR1 OS=Mus musculus OX=10090 GN=Zpr1 PE=1 SV=1;tr|F8WHU9|F8WHU9_MOUSE Zinc finger protein ZPR1 (Fragment) OS=Mus musculus OX=10090 GN=Zpr1 PE=1 SV=1	-0.0552309	0.132457	-0.00729981	0.82819	0.0479311	-0.0621166	0.0971648	-0.0141855	0.674743
E3 ubiquitin-protein ligase ZNRF2	Znrf2	NO	sp|Q71FD5|ZNRF2_MOUSE E3 ubiquitin-protein ligase ZNRF2 OS=Mus musculus OX=10090 GN=Znrf2 PE=1 SV=1;tr|F6X469|F6X469_MOUSE E3 ubiquitin-protein ligase ZNRF2 (Fragment) OS=Mus musculus OX=10090 GN=Znrf2 PE=1 SV=1	-0.02751	0.542353	0.14189	0.0132844	0.1694	-0.750954	5.62996e-07	-0.581554	3.14767e-06
NFX1-type zinc finger-containing protein 1	Znfx1	NO	sp|Q8R151|ZNFX1_MOUSE NFX1-type zinc finger-containing protein 1 OS=Mus musculus OX=10090 GN=Znfx1 PE=1 SV=3;tr|A2A5R6|A2A5R6_MOUSE NFX1-type zinc finger-containing protein 1 OS=Mus musculus OX=10090 GN=Znfx1 PE=1 SV=1	0.0337265	0.519548	0.137401	0.0283024	0.103675	-0.11707	0.0511791	-0.0133954	0.795438
Zinc finger protein 706	Znf706	NO	sp|Q9D115|ZN706_MOUSE Zinc finger protein 706 OS=Mus musculus OX=10090 GN=Znf706 PE=1 SV=1	-0.145857	0.199338	-0.0858528	0.431445	0.0600041	-1.21806	7.65329e-06	-1.15806	1.06852e-05
Zinc finger protein 598	Znf598	NO	sp|Q80YR4|ZN598_MOUSE E3 ubiquitin-protein ligase ZNF598 OS=Mus musculus OX=10090 GN=Znf598 PE=1 SV=1	-0.0613007	0.11409	0.0352953	0.332899	0.0965959	-0.100915	0.0209334	-0.00431938	0.902249
Zinc finger protein 330	Znf330	NO	sp|Q922H9|ZN330_MOUSE Zinc finger protein 330 OS=Mus musculus OX=10090 GN=Znf330 PE=1 SV=1	-0.100031	0.0636922	0.179675	0.00559421	0.279705	-0.418148	3.95296e-05	-0.138443	0.0188114
Zinc finger MYM-type protein 3	Zmym3	YES	tr|B0R077|B0R077_MOUSE Zinc finger MYM-type protein 3 OS=Mus musculus OX=10090 GN=Zmym3 PE=1 SV=1;tr|Q8CG95|Q8CG95_MOUSE Zinc finger MYM-type protein 3 OS=Mus musculus OX=10090 GN=Zmym3 PE=1 SV=1;tr|B1AXS6|B1AXS6_MOUSE Zinc finger MYM-type protein 3 OS=Mus	-0.029379	0.768229	-0.18146	0.100741	-0.152081	-0.309598	0.0147105	-0.461678	0.00199996
CAAX prenyl protease 1 homolog	Zmpste24	YES	sp|Q80W54|FACE1_MOUSE CAAX prenyl protease 1 homolog OS=Mus musculus OX=10090 GN=Zmpste24 PE=1 SV=2	-0.0745143	0.0489973	-0.0587155	0.102841	0.0157987	0.138979	0.0030764	0.154778	0.00171363
Protrudin	Zfyve27	NO	sp|Q3TXX3|ZFY27_MOUSE Protrudin OS=Mus musculus OX=10090 GN=Zfyve27 PE=1 SV=2	0.084864	0.222862	0.0561773	0.405117	-0.0286867	0.101677	0.153181	0.0729899	0.287664
Zinc finger FYVE domain-containing protein 26	Zfyve26	NO	sp|Q5DU37|ZFY26_MOUSE Zinc finger FYVE domain-containing protein 26 OS=Mus musculus OX=10090 GN=Zfyve26 PE=1 SV=2	-0.20148	0.00314595	-0.350215	0.00012448	-0.148736	0.0679683	0.179319	-0.0807673	0.119623
Abscission/NoCut checkpoint regulator	Zfyve19	NO	sp|Q9DAZ9|ANCHR_MOUSE Abscission/NoCut checkpoint regulator OS=Mus musculus OX=10090 GN=Zfyve19 PE=1 SV=2;tr|Q4KL52|Q4KL52_MOUSE Abscission/NoCut checkpoint regulator OS=Mus musculus OX=10090 GN=Zfyve19 PE=1 SV=1	-0.258211	0.00787335	0.138721	0.0879648	0.396932	-0.835009	7.23257e-06	-0.438077	0.000438151
Zinc finger FYVE domain-containing protein 1	Zfyve1	NO	sp|Q810J8|ZFYV1_MOUSE Zinc finger FYVE domain-containing protein 1 OS=Mus musculus OX=10090 GN=Zfyve1 PE=1 SV=2	-0.0443453	0.396549	-0.0307362	0.551183	0.0136091	-0.112968	0.0552906	-0.0993592	0.0830677
Zinc finger protein ZFPM1	Zfpm1	NO	sp|O35615|FOG1_MOUSE Zinc finger protein ZFPM1 OS=Mus musculus OX=10090 GN=Zfpm1 PE=1 SV=1	-0.0512046	0.727018	-0.156171	0.304538	-0.104966	-0.194562	0.210114	-0.299529	0.0715027
Zinc finger protein-like 1	Zfpl1	NO	sp|Q9DB43|ZFPL1_MOUSE Zinc finger protein-like 1 OS=Mus musculus OX=10090 GN=Zfpl1 PE=1 SV=1;tr|E0CX79|E0CX79_MOUSE Zinc finger protein-like 1 (Fragment) OS=Mus musculus OX=10090 GN=Zfpl1 PE=1 SV=1;tr|E0CXR3|E0CXR3_MOUSE Zinc finger protein-like 1 (Fragmen	0.134729	0.019579	0.0188411	0.685203	-0.115888	0.195135	0.00333734	0.0792473	0.119059
	Zfp947	NO	tr|Q8BIQ6|Q8BIQ6_MOUSE MCG23335 OS=Mus musculus OX=10090 GN=Zfp947 PE=1 SV=1	-0.484781	0.0148345	-0.0372746	0.811414	0.447506	0.463091	0.0181135	0.910597	0.000539516
	Zfp72	NO	tr|Q0VFY0|Q0VFY0_MOUSE Zinc finger protein 72 OS=Mus musculus OX=10090 GN=Zfp72 PE=2 SV=1	-0.162302	0.220677	-0.133773	0.304248	0.0285293	-0.215969	0.116873	-0.187439	0.16448
	Zfp334	YES	tr|A2A4U6|A2A4U6_MOUSE Zinc finger protein 334 OS=Mus musculus OX=10090 GN=Zfp334 PE=1 SV=1	0.00509849	0.970102	0.0562465	0.681202	0.0511481	0.410651	0.0169003	0.461799	0.00994355
BUB3-interacting and GLEBS motif-containing protein ZNF207	Zfp207;Znf207	YES	tr|B1AQG7|B1AQG7_MOUSE Zinc finger protein 207 (Fragment) OS=Mus musculus OX=10090 GN=Zfp207 PE=1 SV=1;tr|Q8CCB2|Q8CCB2_MOUSE Zinc finger protein 207 OS=Mus musculus OX=10090 GN=Zfp207 PE=1 SV=1;sp|Q9JMD0|ZN207_MOUSE BUB3-interacting and GLEBS motif-contai	-0.0990269	0.345289	0.0440408	0.666185	0.143068	-0.208425	0.0710065	-0.0653575	0.525531
AN1-type zinc finger protein 2B	Zfand2b	NO	sp|Q91X58|ZFN2B_MOUSE AN1-type zinc finger protein 2B OS=Mus musculus OX=10090 GN=Zfand2b PE=1 SV=1;tr|E0CY18|E0CY18_MOUSE AN1-type zinc finger protein 2B (Fragment) OS=Mus musculus OX=10090 GN=Zfand2b PE=1 SV=1;tr|A0A087WPF5|A0A087WPF5_MOUSE AN1-type zinc	-0.244379	0.0999278	-0.237647	0.10787	0.00673257	-0.376321	0.0225427	-0.369589	0.0242759
AN1-type zinc finger protein 1	Zfand1	NO	sp|Q8BFR6|ZFAN1_MOUSE AN1-type zinc finger protein 1 OS=Mus musculus OX=10090 GN=Zfand1 PE=1 SV=1;tr|F7CFT1|F7CFT1_MOUSE AN1-type zinc finger protein 1 (Fragment) OS=Mus musculus OX=10090 GN=Zfand1 PE=1 SV=1	0.010281	0.86282	0.079497	0.208628	0.0692161	-0.297937	0.0013098	-0.228721	0.0054019
Protein zer-1 homolog	Zer1	NO	sp|Q80ZJ6|ZER1_MOUSE Protein zer-1 homolog OS=Mus musculus OX=10090 GN=Zer1 PE=1 SV=1	-0.621291	0.000414428	-0.442786	0.00285387	0.178505	0.0514987	0.616214	0.230004	0.0520644
Palmitoyltransferase ZDHHC6	Zdhhc6	NO	sp|Q9CPV7|ZDHC6_MOUSE Palmitoyltransferase ZDHHC6 OS=Mus musculus OX=10090 GN=Zdhhc6 PE=1 SV=1	-0.243145	0.0108679	-0.186322	0.0335248	0.0568226	0.346589	0.00177523	0.403412	0.000747915
Palmitoyltransferase ZDHHC5	Zdhhc5	YES	sp|Q8VDZ4|ZDHC5_MOUSE Palmitoyltransferase ZDHHC5 OS=Mus musculus OX=10090 GN=Zdhhc5 PE=1 SV=1	-0.0844261	0.4367	-0.0629739	0.557829	0.0214523	-1.19802	8.27542e-06	-1.17657	9.32504e-06
Palmitoyltransferase;Probable palmitoyltransferase ZDHHC4	Zdhhc4	NO	tr|E0CXP7|E0CXP7_MOUSE Probable palmitoyltransferase ZDHHC4 (Fragment) OS=Mus musculus OX=10090 GN=Zdhhc4 PE=1 SV=1;tr|E0CY85|E0CY85_MOUSE Probable palmitoyltransferase ZDHHC4 (Fragment) OS=Mus musculus OX=10090 GN=Zdhhc4 PE=1 SV=1;tr|E0CX22|E0CX22_MOUSE P	0.426085	0.00664249	-0.0602918	0.605109	-0.486377	-0.045717	0.693747	-0.532094	0.00208697
Palmitoyltransferase ZDHHC3	Zdhhc3	YES	sp|Q8R173|ZDHC3_MOUSE Palmitoyltransferase ZDHHC3 OS=Mus musculus OX=10090 GN=Zdhhc3 PE=1 SV=1	-0.0868309	0.377856	0.0344135	0.720028	0.121244	0.146549	0.156378	0.267793	0.0231309
Probable palmitoyltransferase ZDHHC21	Zdhhc21	YES	sp|Q9D270|ZDH21_MOUSE Probable palmitoyltransferase ZDHHC21 OS=Mus musculus OX=10090 GN=Zdhhc21 PE=1 SV=2	0.209883	0.0997059	0.289335	0.0348258	0.0794525	-0.00981124	0.931733	0.0696413	0.548607
Probable palmitoyltransferase ZDHHC20	Zdhhc20	YES	sp|Q5Y5T1|ZDH20_MOUSE Palmitoyltransferase ZDHHC20 OS=Mus musculus OX=10090 GN=Zdhhc20 PE=1 SV=1	0.176513	0.000638493	0.164372	0.000966761	-0.0121401	-0.100523	0.0124572	-0.112663	0.0072777
Palmitoyltransferase ZDHHC18	Zdhhc18	NO	sp|Q5Y5T2|ZDH18_MOUSE Palmitoyltransferase ZDHHC18 OS=Mus musculus OX=10090 GN=Zdhhc18 PE=1 SV=4	-0.814607	0.030228	0.293282	0.360793	1.10789	-0.0898084	0.773247	1.01808	0.0117209
Palmitoyltransferase ZDHHC17	Zdhhc17	YES	sp|Q80TN5|ZDH17_MOUSE Palmitoyltransferase ZDHHC17 OS=Mus musculus OX=10090 GN=Zdhhc17 PE=1 SV=2	-0.00147822	0.982397	0.00112707	0.986578	0.00260529	0.159391	0.0435021	0.161997	0.0410243
Palmitoyltransferase ZDHHC13;Palmitoyltransferase	Zdhhc13	YES	sp|Q9CWU2|ZDH13_MOUSE Palmitoyltransferase ZDHHC13 OS=Mus musculus OX=10090 GN=Zdhhc13 PE=1 SV=2;tr|D3YY07|D3YY07_MOUSE Palmitoyltransferase (Fragment) OS=Mus musculus OX=10090 GN=Zdhhc13 PE=1 SV=1	-0.128273	0.0553562	-0.0465833	0.431225	0.0816892	0.0941802	0.135488	0.175869	0.0163102
Terminal uridylyltransferase 7	Zcchc6	YES	tr|E9PUA2|E9PUA2_MOUSE Terminal uridylyl transferase 7 OS=Mus musculus OX=10090 GN=Tut7 PE=1 SV=1;sp|Q5BLK4|TUT7_MOUSE Terminal uridylyltransferase 7 OS=Mus musculus OX=10090 GN=Tut7 PE=1 SV=3;tr|A0A286YDD7|A0A286YDD7_MOUSE Terminal uridylyl transferase 7	-0.0954246	0.0140714	-0.0641648	0.0648171	0.0312597	-0.199975	0.000259684	-0.168715	0.000718652
Terminal uridylyltransferase 4	Zcchc11	YES	tr|A2A8R7|A2A8R7_MOUSE Terminal uridylyl transferase 4 OS=Mus musculus OX=10090 GN=Tut4 PE=1 SV=1;sp|B2RX14|TUT4_MOUSE Terminal uridylyltransferase 4 OS=Mus musculus OX=10090 GN=Tut4 PE=1 SV=2	-0.19834	0.434788	-0.0365149	0.883054	0.161826	0.0649987	0.793803	0.226824	0.375056
Zinc finger CCCH-type antiviral protein 1	Zc3hav1	NO	tr|D3Z5I1|D3Z5I1_MOUSE Zinc finger CCCH-type antiviral protein 1 OS=Mus musculus OX=10090 GN=Zc3hav1 PE=1 SV=1;sp|Q3UPF5|ZCCHV_MOUSE Zinc finger CCCH-type antiviral protein 1 OS=Mus musculus OX=10090 GN=Zc3hav1 PE=1 SV=1;tr|G3X9X5|G3X9X5_MOUSE Zinc finger	0.0472182	0.324958	0.0771309	0.127657	0.0299126	-0.590508	3.6441e-06	-0.560596	5.15272e-06
	Zc3h7b	YES	tr|F8VPP8|F8VPP8_MOUSE Zinc finger CCCH type-containing 7B OS=Mus musculus OX=10090 GN=Zc3h7b PE=1 SV=1	-0.0342811	0.43365	-0.0640761	0.164787	-0.029795	-0.031687	0.467756	-0.0614821	0.180215
	Zc3h7a	YES	tr|E9Q8M5|E9Q8M5_MOUSE Zinc finger CCCH type-containing 7 A (Fragment) OS=Mus musculus OX=10090 GN=Zc3h7a PE=1 SV=1;tr|E9PWW6|E9PWW6_MOUSE Zinc finger CCCH type-containing 7 A OS=Mus musculus OX=10090 GN=Zc3h7a PE=1 SV=1;tr|E9Q0D3|E9Q0D3_MOUSE Zinc finger	0.110511	0.0420808	-0.093511	0.0737088	-0.204022	0.090717	0.0808457	-0.113305	0.0384052
Zinc finger CCCH domain-containing protein 4	Zc3h4	YES	tr|A0A1B0GRU3|A0A1B0GRU3_MOUSE Zinc finger CCCH domain-containing protein 4 OS=Mus musculus OX=10090 GN=Zc3h4 PE=1 SV=1;tr|E9Q8K8|E9Q8K8_MOUSE Zinc finger CCCH domain-containing protein 4 OS=Mus musculus OX=10090 GN=Zc3h4 PE=1 SV=1;sp|Q6ZPZ3|ZC3H4_MOUSE Zi	0.0568785	0.194768	0.0637768	0.15203	0.00689836	-1.16166	1.6572e-08	-1.15476	1.72631e-08
Zinc finger CCCH domain-containing protein 15	Zc3h15	NO	sp|Q3TIV5|ZC3HF_MOUSE Zinc finger CCCH domain-containing protein 15 OS=Mus musculus OX=10090 GN=Zc3h15 PE=1 SV=2	0.0349409	0.705972	0.14319	0.151638	0.10825	-0.632738	0.000202175	-0.524488	0.00062756
Probable ribonuclease ZC3H12C	Zc3h12c;Zc3h12b	YES	tr|E9Q1I3|E9Q1I3_MOUSE Probable ribonuclease ZC3H12C OS=Mus musculus OX=10090 GN=Zc3h12c PE=1 SV=1;sp|Q5DTV4|ZC12C_MOUSE Probable ribonuclease ZC3H12C OS=Mus musculus OX=10090 GN=Zc3h12c PE=1 SV=2;tr|G3X9I7|G3X9I7_MOUSE MCG2522 OS=Mus musculus OX=10090 GN=	0.194321	0.00192504	0.0369824	0.387033	-0.157339	0.00637081	0.878196	-0.150968	0.0071693
Ribonuclease ZC3H12A	Zc3h12a	NO	sp|Q5D1E7|ZC12A_MOUSE Endoribonuclease ZC3H12A OS=Mus musculus OX=10090 GN=Zc3h12a PE=1 SV=2	-0.0974687	0.278904	-0.301915	0.00848297	-0.204446	0.250966	0.0195475	0.04652	0.592648
	Zbtb16	YES	tr|Q3UQ17|Q3UQ17_MOUSE MCG3834 OS=Mus musculus OX=10090 GN=Zbtb16 PE=1 SV=1	-0.00469618	0.977678	-0.63844	0.00572574	-0.633744	0.0305574	0.855709	-0.603186	0.00757631
Coiled-coil-helix-coiled-coil-helix domain-containing protein 2	Zbed5;Chchd2	NO	tr|D3Z5B1|D3Z5B1_MOUSE Zinc finger, BED type-containing 5 (Fragment) OS=Mus musculus OX=10090 GN=Zbed5 PE=4 SV=8;tr|B2RPU8|B2RPU8_MOUSE MCG130675 OS=Mus musculus OX=10090 GN=Zbed5 PE=1 SV=1;sp|Q9D1L0|CHCH2_MOUSE Coiled-coil-helix-coiled-coil-helix domain-c	-0.0414812	0.575022	0.243617	0.0108365	0.285098	-0.528112	0.00014782	-0.243014	0.0109618
Mitogen-activated protein kinase kinase kinase MLT	Zak	NO	sp|Q9ESL4|M3K20_MOUSE Mitogen-activated protein kinase kinase kinase 20 OS=Mus musculus OX=10090 GN=Map3k20 PE=1 SV=1	0.0779682	0.0180977	-0.0217085	0.419809	-0.0996767	0.204506	9.18565e-05	0.104829	0.00446545
Zinc-binding alcohol dehydrogenase domain-containing protein 2	Zadh2	YES	sp|Q8BGC4|PTGR3_MOUSE Prostaglandin reductase-3 OS=Mus musculus OX=10090 GN=Zadh2 PE=1 SV=1	0.050434	0.197863	0.0703725	0.0877309	0.0199386	0.0609671	0.129303	0.0809057	0.0566897
14-3-3 protein zeta/delta	Ywhaz	YES	sp|P63101|1433Z_MOUSE 14-3-3 protein zeta/delta OS=Mus musculus OX=10090 GN=Ywhaz PE=1 SV=1;tr|A0A2I3BQ03|A0A2I3BQ03_MOUSE 14-3-3 protein zeta/delta (Fragment) OS=Mus musculus OX=10090 GN=Ywhaz PE=1 SV=1	0.0249909	0.491902	-0.011041	0.758	-0.0360319	0.0623259	0.113826	0.026294	0.470441
14-3-3 protein theta	Ywhaq	YES	tr|F6YY69|F6YY69_MOUSE 14-3-3 protein theta (Fragment) OS=Mus musculus OX=10090 GN=Ywhaq PE=1 SV=1;tr|F6VW30|F6VW30_MOUSE 14-3-3 protein theta (Fragment) OS=Mus musculus OX=10090 GN=Ywhaq PE=1 SV=1;sp|P68254|1433T_MOUSE 14-3-3 protein theta OS=Mus musculus	0.0618368	0.187441	-0.0627616	0.181729	-0.124598	0.216831	0.0014097	0.0922326	0.0659524
14-3-3 protein eta	Ywhah	NO	sp|P68510|1433F_MOUSE 14-3-3 protein eta OS=Mus musculus OX=10090 GN=Ywhah PE=1 SV=2	0.0537107	0.211701	-0.0550274	0.201946	-0.108738	0.163672	0.00418796	0.054934	0.202625
14-3-3 protein gamma;14-3-3 protein gamma, N-terminally processed	Ywhag	NO	sp|P61982|1433G_MOUSE 14-3-3 protein gamma OS=Mus musculus OX=10090 GN=Ywhag PE=1 SV=2	0.0400795	0.286933	-0.0133744	0.711803	-0.0534539	0.18754	0.00105455	0.134086	0.00637096
14-3-3 protein epsilon	Ywhae	YES	sp|P62259|1433E_MOUSE 14-3-3 protein epsilon OS=Mus musculus OX=10090 GN=Ywhae PE=1 SV=1;tr|D6REF3|D6REF3_MOUSE 14-3-3 protein epsilon OS=Mus musculus OX=10090 GN=Ywhae PE=1 SV=1	-0.0891144	0.0190844	-0.08021	0.0293564	0.00890441	0.0394262	0.22077	0.0483306	0.143478
14-3-3 protein beta/alpha;14-3-3 protein beta/alpha, N-terminally processed	Ywhab	YES	sp|Q9CQV8|1433B_MOUSE 14-3-3 protein beta/alpha OS=Mus musculus OX=10090 GN=Ywhab PE=1 SV=3;tr|A2A5N1|A2A5N1_MOUSE 14-3-3 protein beta/alpha (Fragment) OS=Mus musculus OX=10090 GN=Ywhab PE=1 SV=1	-0.0163217	0.609455	-0.0525345	0.129332	-0.0362129	0.182226	0.000585771	0.146013	0.00207288
YTH domain-containing family protein 3	Ythdf3	YES	sp|Q8BYK6|YTHD3_MOUSE YTH domain-containing family protein 3 OS=Mus musculus OX=10090 GN=Ythdf3 PE=1 SV=2	-0.135442	0.0039695	-0.0767664	0.0478094	0.0586761	-0.101774	0.0156777	-0.0430981	0.220079
YTH domain-containing family protein 1	Ythdf1	NO	tr|A2AWN8|A2AWN8_MOUSE YTH domain family 1, isoform CRA_a OS=Mus musculus OX=10090 GN=Ythdf1 PE=1 SV=1;sp|P59326|YTHD1_MOUSE YTH domain-containing family protein 1 OS=Mus musculus OX=10090 GN=Ythdf1 PE=1 SV=1	-0.0734548	0.226189	-0.17648	0.0155067	-0.103025	-0.0681369	0.25809	-0.171162	0.0177171
Probable ATP-dependent RNA helicase YTHDC2	Ythdc2	NO	sp|B2RR83|YTDC2_MOUSE 3-5 RNA helicase YTHDC2 OS=Mus musculus OX=10090 GN=Ythdc2 PE=1 SV=1;tr|A0A0J9YV44|A0A0J9YV44_MOUSE 3-5 RNA helicase YTHDC2 (Fragment) OS=Mus musculus OX=10090 GN=Ythdc2 PE=1 SV=1	0.0237954	0.632586	-0.0495834	0.332529	-0.0733788	-0.036793	0.465058	-0.110172	0.0542603
YrdC domain-containing protein, mitochondrial	Yrdc	YES	sp|Q3U5F4|YRDC_MOUSE YrdC domain-containing protein, mitochondrial OS=Mus musculus OX=10090 GN=Yrdc PE=1 SV=1	0.113481	0.302091	-0.108043	0.324086	-0.221524	0.270486	0.0329635	0.0489621	0.645297
Protein yippee-like 5	Ypel5	YES	sp|P62700|YPEL5_MOUSE Protein yippee-like 5 OS=Mus musculus OX=10090 GN=Ypel5 PE=1 SV=1	0.0935054	0.0482868	-0.115474	0.0215034	-0.208979	0.124783	0.0154225	-0.0841962	0.0684788
Ubiquitin thioesterase OTU1	Yod1	NO	sp|Q8CB27|OTU1_MOUSE Ubiquitin thioesterase OTU1 OS=Mus musculus OX=10090 GN=Yod1 PE=1 SV=1	0.114359	0.0689789	0.0514127	0.366055	-0.0629467	-0.0962685	0.113591	-0.159215	0.0203885
ATP-dependent zinc metalloprotease YME1L1	Yme1l1	YES	sp|O88967|YMEL1_MOUSE ATP-dependent zinc metalloprotease YME1L1 OS=Mus musculus OX=10090 GN=Yme1l1 PE=1 SV=1	0.0238098	0.687088	0.0373073	0.531582	0.0134975	0.278793	0.00177904	0.292291	0.00136591
Synaptobrevin homolog YKT6	Ykt6	NO	sp|Q9CQW1|YKT6_MOUSE Synaptobrevin homolog YKT6 OS=Mus musculus OX=10090 GN=Ykt6 PE=1 SV=1	-0.0441833	0.152117	-0.0205396	0.479032	0.0236437	-0.0194387	0.502072	0.00420505	0.882636
Protein YIPF5	Yipf5	NO	sp|Q9EQQ2|YIPF5_MOUSE Protein YIPF5 OS=Mus musculus OX=10090 GN=Yipf5 PE=1 SV=1	0.0316756	0.580014	-0.0274452	0.630621	-0.0591208	-0.419569	0.000125506	-0.47869	5.44397e-05
Protein YIPF4	Yipf4	YES	sp|Q8C407|YIPF4_MOUSE Protein YIPF4 OS=Mus musculus OX=10090 GN=Yipf4 PE=1 SV=1	0.153125	0.0476205	0.194592	0.0187416	0.0414672	-0.50633	0.000101734	-0.464863	0.000173595
Protein YIPF3;Protein YIPF3, N-terminally processed	Yipf3	NO	sp|Q3UDR8|YIPF3_MOUSE Protein YIPF3 OS=Mus musculus OX=10090 GN=Yipf3 PE=1 SV=1	0.0213329	0.698274	0.032015	0.563496	0.0106821	-0.247306	0.00232538	-0.236623	0.00294908
Protein YIPF2	Yipf2	NO	sp|Q99LP8|YIPF2_MOUSE Protein YIPF2 OS=Mus musculus OX=10090 GN=Yipf2 PE=2 SV=1	0.19732	0.0108825	0.0726948	0.244578	-0.124626	0.102942	0.115282	-0.0216835	0.715813
Protein YIPF;Protein YIPF1	Yipf1	NO	tr|A2A8S2|A2A8S2_MOUSE Protein YIPF (Fragment) OS=Mus musculus OX=10090 GN=Yipf1 PE=1 SV=8;tr|A2A8S3|A2A8S3_MOUSE Protein YIPF (Fragment) OS=Mus musculus OX=10090 GN=Yipf1 PE=1 SV=1;sp|Q91VU1|YIPF1_MOUSE Protein YIPF1 OS=Mus musculus OX=10090 GN=Yipf1 PE=2	0.0223236	0.715247	0.0229434	0.70778	0.000619753	0.107415	0.110635	0.108035	0.108944
Protein YIF1B	Yif1b	NO	sp|Q9CX30|YIF1B_MOUSE Protein YIF1B OS=Mus musculus OX=10090 GN=Yif1b PE=1 SV=2;tr|D3YY42|D3YY42_MOUSE Protein YIF1B OS=Mus musculus OX=10090 GN=Yif1b PE=1 SV=1;tr|A0A140LHN0|A0A140LHN0_MOUSE Protein YIF1B (Fragment) OS=Mus musculus OX=10090 GN=Yif1b PE=1	0.114965	0.0085798	-0.0216537	0.516318	-0.136619	0.158661	0.0016074	0.0220419	0.509069
Y-box-binding protein 3	Ybx3	YES	sp|Q9JKB3|YBOX3_MOUSE Y-box-binding protein 3 OS=Mus musculus OX=10090 GN=Ybx3 PE=1 SV=2	0.226963	0.0111645	0.109784	0.141314	-0.117179	-0.322263	0.00187328	-0.439442	0.000308416
Nuclease-sensitive element-binding protein 1	Ybx1	YES	sp|P62960|YBOX1_MOUSE Nuclease-sensitive element-binding protein 1 OS=Mus musculus OX=10090 GN=Ybx1 PE=1 SV=3;tr|A2BGG7|A2BGG7_MOUSE Nuclease-sensitive element-binding protein 1 (Fragment) OS=Mus musculus OX=10090 GN=Ybx1 PE=1 SV=1	0.212753	0.132965	0.368243	0.0218179	0.15549	-0.184492	0.183861	-0.0290021	0.823173
Tyrosine--tRNA ligase;Tyrosine--tRNA ligase, cytoplasmic;Tyrosine--tRNA ligase, cytoplasmic, N-terminally processed	Yars	NO	tr|A2A7S7|A2A7S7_MOUSE Tyrosine--tRNA ligase OS=Mus musculus OX=10090 GN=Yars PE=1 SV=1;sp|Q91WQ3|SYYC_MOUSE Tyrosine--tRNA ligase, cytoplasmic OS=Mus musculus OX=10090 GN=Yars PE=1 SV=3	-0.0341684	0.448614	-0.0670382	0.159631	-0.0328698	0.0249619	0.57602	-0.00790784	0.857873
Transcriptional coactivator YAP1	Yap1	YES	sp|P46938|YAP1_MOUSE Transcriptional coactivator YAP1 OS=Mus musculus OX=10090 GN=Yap1 PE=1 SV=2;tr|G3UYA6|G3UYA6_MOUSE Transcriptional coactivator YAP1 OS=Mus musculus OX=10090 GN=Yap1 PE=1 SV=1;tr|G3UY62|G3UY62_MOUSE Transcriptional coactivator YAP1 OS=M	0.181132	0.00375481	0.382331	4.48935e-05	0.201199	-0.545922	4.3408e-06	-0.344723	8.69213e-05
Xylulose kinase	Xylb	NO	sp|Q3TNA1|XYLB_MOUSE Xylulose kinase OS=Mus musculus OX=10090 GN=Xylb PE=1 SV=1	0.0043679	0.964551	0.0127738	0.896646	0.00840585	-0.0399804	0.686005	-0.0315746	0.748942
Xyloside xylosyltransferase 1	Xxylt1	YES	sp|Q3U4G3|XXLT1_MOUSE Xyloside xylosyltransferase 1 OS=Mus musculus OX=10090 GN=Xxylt1 PE=1 SV=2	1.16202	0.0626006	-0.381004	0.491063	-1.54302	0.014962	0.978028	-1.52806	0.0227973
5-3 exoribonuclease 1	Xrn1	YES	tr|A0A087WQN7|A0A087WQN7_MOUSE 5-3 exoribonuclease 1 OS=Mus musculus OX=10090 GN=Xrn1 PE=1 SV=1;tr|F8VQ87|F8VQ87_MOUSE 5-3 exoribonuclease 1 OS=Mus musculus OX=10090 GN=Xrn1 PE=1 SV=1;sp|P97789|XRN1_MOUSE 5-3 exoribonuclease 1 OS=Mus musculus OX=1009	0.0148566	0.626902	-0.0434332	0.181233	-0.0582899	-0.0690025	0.0506631	-0.127292	0.00343079
Mitochondrial inner membrane protease ATP23 homolog	Xrcc6bp1	NO	tr|G3UW46|G3UW46_MOUSE Mitochondrial inner membrane protease ATP23 OS=Mus musculus OX=10090 GN=Atp23 PE=1 SV=1;sp|Q9CWQ3|ATP23_MOUSE Mitochondrial inner membrane protease ATP23 homolog OS=Mus musculus OX=10090 GN=Atp23 PE=1 SV=1	0.291851	0.0223836	0.100583	0.346791	-0.191269	0.394616	0.00560555	0.203347	0.0811492
Xenotropic and polytropic retrovirus receptor 1	Xpr1	YES	tr|D3Z2B4|D3Z2B4_MOUSE Xenotropic and polytropic retrovirus receptor 1 OS=Mus musculus OX=10090 GN=Xpr1 PE=1 SV=1;sp|Q9Z0U0|XPR1_MOUSE Xenotropic and polytropic retrovirus receptor 1 OS=Mus musculus OX=10090 GN=Xpr1 PE=1 SV=1	-0.165437	0.0282253	-0.325843	0.00100132	-0.160406	0.284347	0.00214968	0.123941	0.0774988
Exportin-T	Xpot	NO	tr|A0A1W2P7Q6|A0A1W2P7Q6_MOUSE Exportin-T OS=Mus musculus OX=10090 GN=Xpot PE=1 SV=1;sp|Q9CRT8|XPOT_MOUSE Exportin-T OS=Mus musculus OX=10090 GN=Xpot PE=1 SV=3	0.00791043	0.789075	0.044983	0.15836	0.0370725	0.0521976	0.109694	0.0892702	0.0166998
Exportin-7	Xpo7	YES	tr|A0A2I3BQV5|A0A2I3BQV5_MOUSE Exportin-7 OS=Mus musculus OX=10090 GN=Xpo7 PE=1 SV=1;sp|Q9EPK7|XPO7_MOUSE Exportin-7 OS=Mus musculus OX=10090 GN=Xpo7 PE=1 SV=3;tr|E9PUW7|E9PUW7_MOUSE Exportin-7 OS=Mus musculus OX=10090 GN=Xpo7 PE=1 SV=1	-0.0375285	0.216738	-0.0529036	0.0974147	-0.0153751	0.00214026	0.940404	-0.0132349	0.646465
Exportin-6	Xpo6	NO	sp|Q924Z6|XPO6_MOUSE Exportin-6 OS=Mus musculus OX=10090 GN=Xpo6 PE=1 SV=2	0.0191848	0.767952	-0.0872997	0.20576	-0.106484	0.451935	0.000184168	0.34545	0.000921981
Exportin-5	Xpo5	NO	sp|Q924C1|XPO5_MOUSE Exportin-5 OS=Mus musculus OX=10090 GN=Xpo5 PE=1 SV=1	0.197924	0.000603171	0.207176	0.000459836	0.00925202	0.0684056	0.0795913	0.0776576	0.0529468
Exportin-4	Xpo4	YES	tr|A0A0R4J254|A0A0R4J254_MOUSE Exportin-4 OS=Mus musculus OX=10090 GN=Xpo4 PE=1 SV=1;sp|Q9ESJ0|XPO4_MOUSE Exportin-4 OS=Mus musculus OX=10090 GN=Xpo4 PE=1 SV=2	0.0149513	0.549231	-0.0107161	0.665651	-0.0256675	0.0644105	0.030489	0.038743	0.147405
Exportin-1	Xpo1	NO	sp|Q6P5F9|XPO1_MOUSE Exportin-1 OS=Mus musculus OX=10090 GN=Xpo1 PE=1 SV=1	0.00787293	0.794117	0.101744	0.0101315	0.0938709	-0.0267357	0.387995	0.0671351	0.0544176
Probable Xaa-Pro aminopeptidase 3	Xpnpep3	NO	sp|B7ZMP1|XPP3_MOUSE Xaa-Pro aminopeptidase 3 OS=Mus musculus OX=10090 GN=Xpnpep3 PE=1 SV=1	-0.132883	0.0354187	0.0719213	0.201483	0.204804	0.0897402	0.122131	0.294544	0.000709612
Xaa-Pro aminopeptidase 1	Xpnpep1	YES	tr|Q3UE92|Q3UE92_MOUSE X-prolyl aminopeptidase (Aminopeptidase P) 1, soluble, isoform CRA_b OS=Mus musculus OX=10090 GN=Xpnpep1 PE=1 SV=1;sp|Q6P1B1|XPP1_MOUSE Xaa-Pro aminopeptidase 1 OS=Mus musculus OX=10090 GN=Xpnpep1 PE=1 SV=1;tr|S4R1I3|S4R1I3_MOUSE Xaa	-0.0381898	0.27606	-0.00731226	0.827415	0.0308775	-0.0192795	0.569532	0.011598	0.730206
Membrane transport protein XK	Xk	NO	sp|Q9QXY7|XK_MOUSE Membrane transport protein XK OS=Mus musculus OX=10090 GN=Xk PE=1 SV=1	0.216206	0.00924865	-0.0146033	0.816246	-0.230809	0.0675662	0.301352	-0.163243	0.0310878
E3 ubiquitin-protein ligase XIAP	Xiap	YES	sp|Q60989|XIAP_MOUSE E3 ubiquitin-protein ligase XIAP OS=Mus musculus OX=10090 GN=Xiap PE=1 SV=2	-0.175562	0.150383	0.259709	0.0484406	0.435271	-0.68626	0.000417339	-0.250989	0.0544797
XIAP-associated factor 1	Xaf1	NO	sp|Q5NBU8|XAF1_MOUSE XIAP-associated factor 1 OS=Mus musculus OX=10090 GN=Xaf1 PE=1 SV=3	-0.0942042	0.344822	0.373859	0.00517516	0.468064	-0.844875	4.32404e-05	-0.376811	0.00497288
WW domain-containing transcription regulator protein 1	Wwtr1	YES	sp|Q9EPK5|WWTR1_MOUSE WW domain-containing transcription regulator protein 1 OS=Mus musculus OX=10090 GN=Wwtr1 PE=1 SV=2	-0.0157176	0.868019	0.379633	0.00433662	0.39535	-0.931353	2.02857e-05	-0.536003	0.000641529
NEDD4-like E3 ubiquitin-protein ligase WWP2	Wwp2	NO	tr|A0A1D5RM92|A0A1D5RM92_MOUSE E3 ubiquitin-protein ligase OS=Mus musculus OX=10090 GN=Wwp2 PE=1 SV=1;sp|Q9DBH0|WWP2_MOUSE NEDD4-like E3 ubiquitin-protein ligase WWP2 OS=Mus musculus OX=10090 GN=Wwp2 PE=1 SV=1;tr|Q3TXI7|Q3TXI7_MOUSE E3 ubiquitin-protein li	-0.196051	0.000186476	-0.164952	0.000531829	0.0310995	-0.186896	0.000250324	-0.155796	0.000744407
WW domain-containing oxidoreductase	Wwox	NO	sp|Q91WL8|WWOX_MOUSE WW domain-containing oxidoreductase OS=Mus musculus OX=10090 GN=Wwox PE=1 SV=1	-0.0185193	0.643977	0.133445	0.0104715	0.151964	0.167285	0.00340475	0.319249	7.58778e-05
Protein WWC2	Wwc2	YES	sp|Q6NXJ0|WWC2_MOUSE Protein WWC2 OS=Mus musculus OX=10090 GN=Wwc2 PE=1 SV=1	0.160364	0.037342	0.0142625	0.825717	-0.146102	-0.330533	0.00117149	-0.476634	0.000130308
WSC domain-containing protein 2	Wscd2	NO	sp|D4PHA7|WSCD2_MOUSE WSC domain-containing protein 2 OS=Mus musculus OX=10090 GN=Wscd2 PE=2 SV=1	-1.24014	0.251939	0.855757	0.417273	2.0959	-1.48001	0.179909	0.615887	0.554627
WD repeat-containing protein WRAP73	Wrap73	NO	sp|Q9JM98|WRP73_MOUSE WD repeat-containing protein WRAP73 OS=Mus musculus OX=10090 GN=Wrap73 PE=1 SV=2	0.0676508	0.391946	-0.181549	0.0445295	-0.2492	0.0773189	0.331814	-0.171881	0.0538809
Protein Wnt-3a	Wnt3a	NO	sp|P27467|WNT3A_MOUSE Protein Wnt-3a OS=Mus musculus OX=10090 GN=Wnt3a PE=1 SV=1	-0.20151	0.0711093	-0.078131	0.436312	0.123379	0.869959	4.01344e-05	0.993338	1.69541e-05
Serine/threonine-protein kinase WNK4	Wnk4	NO	sp|Q80UE6|WNK4_MOUSE Serine/threonine-protein kinase WNK4 OS=Mus musculus OX=10090 GN=Wnk4 PE=1 SV=1	-0.0710522	0.214151	-0.0266292	0.624145	0.044423	-0.00904666	0.866721	0.0353763	0.517976
Serine/threonine-protein kinase WNK1	Wnk1	NO	sp|P83741|WNK1_MOUSE Serine/threonine-protein kinase WNK1 OS=Mus musculus OX=10090 GN=Wnk1 PE=1 SV=2	-0.0561439	0.173418	-0.00646411	0.866286	0.0496798	-0.203114	0.000956854	-0.153435	0.00443184
WD repeat domain phosphoinositide-interacting protein 2	Wipi2	YES	sp|Q80W47|WIPI2_MOUSE WD repeat domain phosphoinositide-interacting protein 2 OS=Mus musculus OX=10090 GN=Wipi2 PE=1 SV=1;tr|D3YWK1|D3YWK1_MOUSE WD repeat domain phosphoinositide-interacting protein 2 OS=Mus musculus OX=10090 GN=Wipi2 PE=1 SV=1	0.130763	0.0204186	-0.0804576	0.108529	-0.211221	-0.067746	0.165332	-0.278967	0.000392273
WD repeat domain phosphoinositide-interacting protein 1	Wipi1	NO	sp|Q8R3E3|WIPI1_MOUSE WD repeat domain phosphoinositide-interacting protein 1 OS=Mus musculus OX=10090 GN=Wipi1 PE=1 SV=1;tr|B1AT64|B1AT64_MOUSE WD repeat domain phosphoinositide-interacting protein 1 OS=Mus musculus OX=10090 GN=Wipi1 PE=1 SV=1	0.0953387	0.259337	0.0266971	0.741001	-0.0686416	-0.032066	0.691907	-0.100708	0.235924
WAS/WASL-interacting protein family member 3	Wipf3	YES	tr|D3Z5R4|D3Z5R4_MOUSE WAS/WASL-interacting protein family member 3 OS=Mus musculus OX=10090 GN=Wipf3 PE=1 SV=1;tr|E9Q2D0|E9Q2D0_MOUSE WAS/WASL-interacting protein family member 3 OS=Mus musculus OX=10090 GN=Wipf3 PE=1 SV=1;sp|P0C7L0|WIPF3_MOUSE WAS/WASL-i	-0.464701	6.59596e-05	0.0686066	0.249647	0.533308	-0.740261	3.12315e-06	-0.206953	0.00696137
WAS/WASL-interacting protein family member 1	Wipf1	YES	sp|Q8K1I7|WIPF1_MOUSE WAS/WASL-interacting protein family member 1 OS=Mus musculus OX=10090 GN=Wipf1 PE=1 SV=1	0.0554932	0.27188	-0.042181	0.394679	-0.0976742	-0.358783	0.000122467	-0.456457	2.62838e-05
Partner of Y14 and mago	Wibg	NO	sp|Q8CHP5|PYM1_MOUSE Partner of Y14 and mago OS=Mus musculus OX=10090 GN=Pym1 PE=1 SV=2	-0.0745398	0.454333	-0.0861403	0.390512	-0.0116005	-0.763448	8.91448e-05	-0.775048	8.10247e-05
WASP homolog-associated protein with actin, membranes and microtubules	Whamm	NO	sp|Q571B6|WHAMM_MOUSE WASP homolog-associated protein with actin, membranes and microtubules OS=Mus musculus OX=10090 GN=Whamm PE=1 SV=2	-0.0767771	0.0186352	-0.0967437	0.00641018	-0.0199665	0.0401181	0.154484	0.0201516	0.448692
Protein N-terminal glutamine amidohydrolase	Wdyhv1	NO	sp|Q80WB5|NTAQ1_MOUSE Protein N-terminal glutamine amidohydrolase OS=Mus musculus OX=10090 GN=Wdyhv1 PE=1 SV=1;tr|Q9CWD7|Q9CWD7_MOUSE Protein N-terminal glutamine amidohydrolase OS=Mus musculus OX=10090 GN=Wdyhv1 PE=1 SV=1;tr|A0A2I3BQY8|A0A2I3BQY8_MOUSE Pr	-0.0752288	0.103185	0.0714003	0.118616	0.146629	0.0391624	0.361491	0.185792	0.0024661
WD and tetratricopeptide repeats protein 1	Wdtc1	NO	sp|Q80ZK9|WDTC1_MOUSE WD and tetratricopeptide repeats protein 1 OS=Mus musculus OX=10090 GN=Wdtc1 PE=1 SV=1;tr|A2AE98|A2AE98_MOUSE WD and tetratricopeptide repeats protein 1 OS=Mus musculus OX=10090 GN=Wdtc1 PE=1 SV=1	-0.0190139	0.810578	-0.0839	0.308642	-0.0648861	0.126989	0.140789	0.0621028	0.443127
WD repeat, SAM and U-box domain-containing protein 1	Wdsub1	NO	sp|Q9D0I6|WSDU1_MOUSE WD repeat, SAM and U-box domain-containing protein 1 OS=Mus musculus OX=10090 GN=Wdsub1 PE=2 SV=1;tr|A2AUX8|A2AUX8_MOUSE WD repeat, SAM and U-box domain-containing protein 1 OS=Mus musculus OX=10090 GN=Wdsub1 PE=1 SV=1;tr|F6R860|F6R86	0.0266405	0.831415	0.234329	0.0934401	0.207689	-0.0189466	0.879554	0.188742	0.161809
WD repeat-containing protein 92	Wdr92	NO	sp|Q8BGF3|WDR92_MOUSE WD repeat-containing protein 92 OS=Mus musculus OX=10090 GN=Wdr92 PE=1 SV=1	0.0336212	0.67068	-0.00877715	0.911039	-0.0423983	0.0329708	0.676605	-0.00942751	0.904485
WD repeat-containing protein 91	Wdr91	NO	sp|Q7TMQ7|WDR91_MOUSE WD repeat-containing protein 91 OS=Mus musculus OX=10090 GN=Wdr91 PE=1 SV=1;tr|S4R1X1|S4R1X1_MOUSE WD repeat-containing protein 91 OS=Mus musculus OX=10090 GN=Wdr91 PE=1 SV=1	-0.213005	0.00395106	-0.155961	0.0174835	0.0570443	-0.323539	0.000372862	-0.266495	0.0011641
WD repeat-containing protein 82	Wdr82	NO	sp|Q8BFQ4|WDR82_MOUSE WD repeat-containing protein 82 OS=Mus musculus OX=10090 GN=Wdr82 PE=1 SV=1	0.158588	0.0117089	0.0790868	0.13457	-0.079501	0.161385	0.0108014	0.0818836	0.12337
WD repeat-containing protein 81	Wdr81	NO	tr|K4DI77|K4DI77_MOUSE WD repeat-containing protein 81 (Fragment) OS=Mus musculus OX=10090 GN=Wdr81 PE=1 SV=1;sp|Q5ND34|WDR81_MOUSE WD repeat-containing protein 81 OS=Mus musculus OX=10090 GN=Wdr81 PE=1 SV=2	-0.221045	0.0024708	-0.0513261	0.31808	0.169719	-0.25516	0.00111206	-0.0854402	0.116956
Methylosome protein 50	Wdr77	NO	sp|Q99J09|MEP50_MOUSE Methylosome protein 50 OS=Mus musculus OX=10090 GN=Wdr77 PE=1 SV=1	-0.0466642	0.581941	-0.0959749	0.274177	-0.0493107	0.0904148	0.300575	0.0411041	0.626822
WD repeat-containing protein 73	Wdr73	YES	tr|F6RXX6|F6RXX6_MOUSE WD repeat-containing protein 73 (Fragment) OS=Mus musculus OX=10090 GN=Wdr73 PE=1 SV=1;sp|Q9CWR1|WDR73_MOUSE WD repeat-containing protein 73 OS=Mus musculus OX=10090 GN=Wdr73 PE=1 SV=1	0.0297734	0.660088	-0.133434	0.079054	-0.163208	0.108805	0.137683	-0.0544031	0.429363
WD repeat-containing protein 7	Wdr7	NO	sp|Q920I9|WDR7_MOUSE WD repeat-containing protein 7 OS=Mus musculus OX=10090 GN=Wdr7 PE=1 SV=3	-0.0205666	0.747997	-0.0748684	0.263423	-0.0543018	0.0685079	0.302568	0.0142061	0.824018
WD repeat-containing protein 61;WD repeat-containing protein 61, N-terminally processed	Wdr61	YES	sp|Q9ERF3|WDR61_MOUSE WD repeat-containing protein 61 OS=Mus musculus OX=10090 GN=Wdr61 PE=1 SV=1;tr|Q8BVQ0|Q8BVQ0_MOUSE WD repeat-containing protein 61 OS=Mus musculus OX=10090 GN=Wdr61 PE=1 SV=1;tr|D6RDC7|D6RDC7_MOUSE WD repeat-containing protein 61 OS=M	0.0234938	0.516768	-0.0140193	0.695873	-0.0375131	0.127342	0.00780903	0.0898289	0.0352209
WD repeat-containing protein 6	Wdr6	NO	sp|Q99ME2|WDR6_MOUSE WD repeat-containing protein 6 OS=Mus musculus OX=10090 GN=Wdr6 PE=1 SV=1	-0.0351614	0.49853	-0.1902	0.0063449	-0.155039	0.0846857	0.129669	-0.0703528	0.196631
WD repeat-containing protein 59	Wdr59	NO	tr|A0A1D5RLJ8|A0A1D5RLJ8_MOUSE GATOR complex protein WDR59 OS=Mus musculus OX=10090 GN=Wdr59 PE=1 SV=1;tr|D3Z1F9|D3Z1F9_MOUSE WD repeat-containing protein 59 OS=Mus musculus OX=10090 GN=Wdr59 PE=1 SV=2;sp|Q8C0M0|WDR59_MOUSE GATOR complex protein WDR59 OS=M	0.0597912	0.217546	-0.058375	0.227458	-0.118166	0.163548	0.00772599	0.045382	0.337835
WD repeat-containing protein 53	Wdr53	NO	sp|Q9DB94|WDR53_MOUSE WD repeat-containing protein 53 OS=Mus musculus OX=10090 GN=Wdr53 PE=1 SV=1	0.268663	0.00264453	0.489935	7.49088e-05	0.221272	-0.427207	0.000177064	-0.205935	0.0101067
WD repeat-containing protein 48	Wdr48	NO	sp|Q8BH57|WDR48_MOUSE WD repeat-containing protein 48 OS=Mus musculus OX=10090 GN=Wdr48 PE=1 SV=1	-0.149997	0.00124112	-0.0998193	0.0103228	0.050178	-0.0717452	0.0408554	-0.0215673	0.475533
WD repeat-containing protein 47	Wdr47	YES	sp|Q8CGF6|WDR47_MOUSE WD repeat-containing protein 47 OS=Mus musculus OX=10090 GN=Wdr47 PE=1 SV=2	-0.101464	0.0192462	-0.133435	0.0053774	-0.0319714	0.0499819	0.17892	0.0180105	0.606812
WD repeat domain phosphoinositide-interacting protein 3	Wdr45b	NO	sp|Q9CR39|WIPI3_MOUSE WD repeat domain phosphoinositide-interacting protein 3 OS=Mus musculus OX=10090 GN=Wdr45b PE=1 SV=2;tr|F7AZP7|F7AZP7_MOUSE WD repeat domain phosphoinositide-interacting protein 3 (Fragment) OS=Mus musculus OX=10090 GN=Wdr45b PE=1 SV=	0.0261752	0.510791	-0.0945253	0.0412214	-0.1207	0.112697	0.0206965	-0.00800347	0.838251
WD repeat domain phosphoinositide-interacting protein 4	Wdr45	NO	sp|Q91VM3|WIPI4_MOUSE WD repeat domain phosphoinositide-interacting protein 4 OS=Mus musculus OX=10090 GN=Wdr45 PE=1 SV=1;tr|A0A140LJJ0|A0A140LJJ0_MOUSE WD repeat domain phosphoinositide-interacting protein 4 (Fragment) OS=Mus musculus OX=10090 GN=Wdr45 PE	-0.0220513	0.724352	0.007496	0.904178	0.0295473	0.0732925	0.262124	0.10284	0.130969
WD repeat-containing protein 44	Wdr44	NO	sp|Q6NVE8|WDR44_MOUSE WD repeat-containing protein 44 OS=Mus musculus OX=10090 GN=Wdr44 PE=1 SV=1	0.165912	0.000896585	0.0527095	0.121617	-0.113203	-0.149972	0.00159192	-0.263175	5.30259e-05
WD repeat-containing protein 41	Wdr41	NO	sp|Q3UDP0|WDR41_MOUSE WD repeat-containing protein 41 OS=Mus musculus OX=10090 GN=Wdr41 PE=1 SV=1;tr|B2RQV3|B2RQV3_MOUSE WD repeat-containing protein 41 OS=Mus musculus OX=10090 GN=Wdr41 PE=1 SV=1;tr|S4R290|S4R290_MOUSE WD repeat-containing protein 41 OS=M	0.0383152	0.449888	-0.0121969	0.8062	-0.050512	0.0591432	0.256772	0.00863117	0.862015
WD repeat-containing protein 37	Wdr37	YES	sp|Q8CBE3|WDR37_MOUSE WD repeat-containing protein 37 OS=Mus musculus OX=10090 GN=Wdr37 PE=1 SV=1	-0.00931605	0.82703	-0.0233309	0.587771	-0.0140149	-0.281192	0.000256714	-0.295207	0.000190328
WD repeat-containing protein 26	Wdr26	YES	tr|E0CYH4|E0CYH4_MOUSE WD repeat-containing protein 26 OS=Mus musculus OX=10090 GN=Wdr26 PE=1 SV=1;sp|Q8C6G8|WDR26_MOUSE WD repeat-containing protein 26 OS=Mus musculus OX=10090 GN=Wdr26 PE=1 SV=3	-0.0148227	0.625075	0.0135249	0.65519	0.0283476	-0.0270375	0.382447	0.00131009	0.965234
WD repeat-containing protein 24	Wdr24	NO	sp|Q8CFJ9|WDR24_MOUSE GATOR complex protein WDR24 OS=Mus musculus OX=10090 GN=Wdr24 PE=1 SV=1	0.0743077	0.174823	-0.0345631	0.50485	-0.108871	0.0620907	0.247373	-0.0467801	0.373232
WD repeat-containing protein 20	Wdr20	YES	tr|Q3UWE6|Q3UWE6_MOUSE MCG14935, isoform CRA_a OS=Mus musculus OX=10090 GN=Wdr20 PE=1 SV=1;tr|A0A1Y7VMB5|A0A1Y7VMB5_MOUSE WD repeat domain 20, retrogene OS=Mus musculus OX=10090 GN=Wdr20rt PE=4 SV=1;tr|A0A1Y7VJI5|A0A1Y7VJI5_MOUSE WD repeat domain 20, retro	-0.00229303	0.960999	-0.141314	0.0170241	-0.139021	-0.197864	0.00335877	-0.336886	0.000153057
WD repeat-containing protein 13	Wdr13	NO	sp|Q91V09|WDR13_MOUSE WD repeat-containing protein 13 OS=Mus musculus OX=10090 GN=Wdr13 PE=1 SV=1;tr|S4R225|S4R225_MOUSE WD repeat-containing protein 13 OS=Mus musculus OX=10090 GN=Wdr13 PE=1 SV=1	-0.00817741	0.896904	-0.0615845	0.345525	-0.0534071	-0.00202709	0.974361	-0.0554342	0.392869
WD repeat-containing protein 11	Wdr11	NO	tr|G5E8J3|G5E8J3_MOUSE Bromodomain and WD repeat domain containing 2, isoform CRA_a OS=Mus musculus OX=10090 GN=Wdr11 PE=1 SV=1;sp|Q8K1X1|WDR11_MOUSE WD repeat-containing protein 11 OS=Mus musculus OX=10090 GN=Wdr11 PE=1 SV=1	-0.0255921	0.382176	-0.0962528	0.0100746	-0.0706607	0.132082	0.00200181	0.061421	0.0606034
WD repeat-containing protein 1	Wdr1	NO	sp|O88342|WDR1_MOUSE WD repeat-containing protein 1 OS=Mus musculus OX=10090 GN=Wdr1 PE=1 SV=3	-0.077197	0.026725	-0.0325013	0.276802	0.0446957	-0.0173465	0.548886	0.0273493	0.353997
	Wdfy4	NO	tr|E9Q2M9|E9Q2M9_MOUSE WD repeat and FYVE domain-containing 4 OS=Mus musculus OX=10090 GN=Wdfy4 PE=1 SV=2;tr|E9PV60|E9PV60_MOUSE WD repeat and FYVE domain-containing 4 OS=Mus musculus OX=10090 GN=Wdfy4 PE=1 SV=1	0.0640419	0.0575507	0.0237551	0.42701	-0.0402868	0.0100501	0.731745	-0.0302367	0.318863
WD repeat and FYVE domain-containing protein 3	Wdfy3	NO	tr|A0A1D5RLV7|A0A1D5RLV7_MOUSE WD repeat and FYVE domain-containing protein 3 OS=Mus musculus OX=10090 GN=Wdfy3 PE=1 SV=1;tr|G3UYW1|G3UYW1_MOUSE WD repeat and FYVE domain-containing protein 3 OS=Mus musculus OX=10090 GN=Wdfy3 PE=1 SV=1;sp|Q6VNB8|WDFY3_MOUS	0.108665	0.00788684	0.059829	0.0819081	-0.0488359	0.0983525	0.0125858	0.0495167	0.136659
	Wdfy1	YES	sp|E9Q4P1|WDFY1_MOUSE WD repeat and FYVE domain-containing protein 1 OS=Mus musculus OX=10090 GN=Wdfy1 PE=1 SV=1	0.198316	0.000421193	0.182281	0.000694476	-0.0160355	0.215041	0.000257871	0.199005	0.000412514
	Wbscr27	NO	tr|A0A0J9YUG5|A0A0J9YUG5_MOUSE Methyltransferase-like 27 (Fragment) OS=Mus musculus OX=10090 GN=Mettl27 PE=1 SV=3;tr|Q8BGM4|Q8BGM4_MOUSE Methyltransferase-like 27 OS=Mus musculus OX=10090 GN=Mettl27 PE=1 SV=1;tr|Q8BY07|Q8BY07_MOUSE Methyltransferase-like 2	0.0166128	0.758466	-0.0834307	0.152699	-0.100043	0.112436	0.067581	0.0123923	0.818289
Williams-Beuren syndrome chromosomal region 16 protein homolog	Wbscr16	NO	sp|Q9CYF5|RCC1L_MOUSE RCC1-like G exchanging factor-like protein OS=Mus musculus OX=10090 GN=Rcc1l PE=1 SV=1	-0.154931	0.475248	-0.249963	0.2632	-0.0950318	0.599126	0.0226963	0.504094	0.0441532
WW domain-binding protein 2	Wbp2	NO	sp|P97765|WBP2_MOUSE WW domain-binding protein 2 OS=Mus musculus OX=10090 GN=Wbp2 PE=1 SV=1	-0.154624	0.0165453	-0.147892	0.0200256	0.00673214	-0.118006	0.0479073	-0.111274	0.0585369
Neural Wiskott-Aldrich syndrome protein	Wasl	YES	sp|Q91YD9|WASL_MOUSE Neural Wiskott-Aldrich syndrome protein OS=Mus musculus OX=10090 GN=Wasl PE=1 SV=1	-0.0492512	0.433167	0.101655	0.13016	0.150906	-0.0242916	0.693934	0.126615	0.0702369
WAS protein family homolog 1	Wash1	NO	sp|Q8VDD8|WASH1_MOUSE WASH complex subunit 1 OS=Mus musculus OX=10090 GN=Washc1 PE=1 SV=1	-0.00489803	0.924333	0.0141351	0.784546	0.0190331	-0.14435	0.023229	-0.125317	0.0402347
Wiskott-Aldrich syndrome protein family member 2	Wasf2	YES	sp|Q8BH43|WASF2_MOUSE Wiskott-Aldrich syndrome protein family member 2 OS=Mus musculus OX=10090 GN=Wasf2 PE=1 SV=1	-0.0328835	0.557684	0.0697355	0.233298	0.102619	-0.264587	0.00170958	-0.161968	0.0193207
Wiskott-Aldrich syndrome protein homolog	Was	NO	sp|P70315|WASP_MOUSE Wiskott-Aldrich syndrome protein homolog OS=Mus musculus OX=10090 GN=Was PE=1 SV=1	0.0092437	0.734571	-0.0196163	0.478444	-0.02886	-0.109011	0.00434667	-0.137871	0.00121567
Tryptophan--tRNA ligase, mitochondrial	Wars2	YES	sp|Q9CYK1|SYWM_MOUSE Tryptophan--tRNA ligase, mitochondrial OS=Mus musculus OX=10090 GN=Wars2 PE=1 SV=2	-0.0411581	0.164797	-0.00929792	0.736075	0.0318602	0.155884	0.000639739	0.187744	0.000208418
Tryptophan--tRNA ligase, cytoplasmic;T1-TrpRS;T2-TrpRS	Wars	NO	sp|P32921|SYWC_MOUSE Tryptophan--tRNA ligase, cytoplasmic OS=Mus musculus OX=10090 GN=Wars PE=1 SV=2	-0.0188829	0.496052	-0.0157583	0.56793	0.00312464	-0.0291992	0.303748	-0.0260746	0.354628
Wings apart-like protein homolog	Wapal	NO	tr|F6YCH1|F6YCH1_MOUSE Wings apart-like protein homolog (Fragment) OS=Mus musculus OX=10090 GN=Wapl PE=1 SV=1;tr|B7ZP47|B7ZP47_MOUSE Wapal protein OS=Mus musculus OX=10090 GN=Wapl PE=1 SV=1;sp|Q65Z40|WAPL_MOUSE Wings apart-like protein homolog OS=Mus muscu	-0.255326	0.127458	-0.018077	0.905898	0.237249	-0.310069	0.0740388	-0.0728203	0.636651
	Vwf	NO	tr|E9QPU1|E9QPU1_MOUSE von Willebrand factor OS=Mus musculus OX=10090 GN=Vwf PE=1 SV=2	-0.0601984	0.589054	0.968143	4.2764e-05	1.02834	-1.21177	9.89108e-06	-0.183432	0.128595
von Willebrand factor;von Willebrand antigen 2	Vwf	NO	sp|Q8CIZ8|VWF_MOUSE von Willebrand factor OS=Mus musculus OX=10090 GN=Vwf PE=1 SV=2	0.00237232	0.977073	1.0064	4.99279e-06	1.00402	-0.268177	0.0121877	0.735848	3.89474e-05
von Willebrand factor A domain-containing protein 8	Vwa8	NO	sp|Q8CC88|VWA8_MOUSE von Willebrand factor A domain-containing protein 8 OS=Mus musculus OX=10090 GN=Vwa8 PE=1 SV=2	0.0168448	0.562916	-0.0257607	0.384141	-0.0426055	0.269934	2.78089e-05	0.227328	8.3738e-05
von Willebrand factor A domain-containing protein 5A	Vwa5a	YES	sp|Q99KC8|VMA5A_MOUSE von Willebrand factor A domain-containing protein 5A OS=Mus musculus OX=10090 GN=Vwa5a PE=1 SV=2	-0.292642	0.115542	0.105379	0.537933	0.398022	-0.431012	0.0333266	-0.0329907	0.845091
Vitronectin	Vtn	NO	sp|P29788|VTNC_MOUSE Vitronectin OS=Mus musculus OX=10090 GN=Vtn PE=1 SV=2	0.220312	0.00358087	0.518096	2.10214e-05	0.297784	-0.784786	1.33294e-06	-0.487001	3.14329e-05
Vesicle transport through interaction with t-SNAREs homolog 1B	Vti1b	NO	tr|Q91XH6|Q91XH6_MOUSE Vesicle transport through interaction with t-SNAREs 1B homolog OS=Mus musculus OX=10090 GN=Vti1b PE=1 SV=1;sp|O88384|VTI1B_MOUSE Vesicle transport through interaction with t-SNAREs homolog 1B OS=Mus musculus OX=10090 GN=Vti1b PE=1 SV	-0.0417567	0.620422	-0.237395	0.0218337	-0.195639	0.0495288	0.558394	-0.14611	0.113181
Vesicle transport through interaction with t-SNAREs homolog 1A	Vti1a	NO	tr|A0A286YDF2|A0A286YDF2_MOUSE Vesicle transport through interaction with t-SNAREs homolog 1A OS=Mus musculus OX=10090 GN=Vti1a PE=1 SV=1;sp|O89116|VTI1A_MOUSE Vesicle transport through interaction with t-SNAREs homolog 1A OS=Mus musculus OX=10090 GN=Vti1a	0.0260637	0.598383	-0.0258265	0.601649	-0.0518902	0.00820732	0.867004	-0.0436829	0.386113
Vacuolar protein sorting-associated protein VTA1 homolog	Vta1	NO	sp|Q9CR26|VTA1_MOUSE Vacuolar protein sorting-associated protein VTA1 homolog OS=Mus musculus OX=10090 GN=Vta1 PE=1 SV=1;tr|F6W5Q8|F6W5Q8_MOUSE Vacuolar protein sorting-associated protein VTA1 homolog (Fragment) OS=Mus musculus OX=10090 GN=Vta1 PE=1 SV=8	-0.0265523	0.571994	-0.0742356	0.141794	-0.0476833	-0.0294703	0.531657	-0.0771536	0.129036
Vacuolar protein sorting-associated protein 8 homolog	Vps8	NO	tr|D3Z5P1|D3Z5P1_MOUSE Vacuolar protein sorting-associated protein 8 homolog OS=Mus musculus OX=10090 GN=Vps8 PE=1 SV=1;tr|F6ZLN8|F6ZLN8_MOUSE Vacuolar protein sorting-associated protein 8 homolog (Fragment) OS=Mus musculus OX=10090 GN=Vps8 PE=1 SV=1;tr|F8	0.0213126	0.657192	-0.0301476	0.533195	-0.0514602	0.0511962	0.302684	-0.000264031	0.99558
Vacuolar protein sorting-associated protein 54	Vps54	YES	sp|Q5SPW0|VPS54_MOUSE Vacuolar protein sorting-associated protein 54 OS=Mus musculus OX=10090 GN=Vps54 PE=1 SV=1;tr|Q5SRW8|Q5SRW8_MOUSE Vacuolar protein sorting-associated protein 54 (Fragment) OS=Mus musculus OX=10090 GN=Vps54 PE=1 SV=1	0.0284047	0.573106	0.116126	0.046706	0.0877211	0.29836	0.000463958	0.386081	9.4944e-05
Vacuolar protein sorting-associated protein 53 homolog	Vps53	NO	sp|Q8CCB4|VPS53_MOUSE Vacuolar protein sorting-associated protein 53 homolog OS=Mus musculus OX=10090 GN=Vps53 PE=1 SV=1;tr|E9PXG9|E9PXG9_MOUSE Vacuolar protein sorting-associated protein 53 homolog OS=Mus musculus OX=10090 GN=Vps53 PE=1 SV=1;tr|E9PWD1|E9P	-0.0260743	0.498889	-0.050024	0.213853	-0.0239497	0.018214	0.633641	-0.00573573	0.87976
Vacuolar protein sorting-associated protein 52 homolog	Vps52	NO	sp|Q8C754|VPS52_MOUSE Vacuolar protein sorting-associated protein 52 homolog OS=Mus musculus OX=10090 GN=Vps52 PE=1 SV=1;tr|G3UY33|G3UY33_MOUSE Vacuolar protein sorting-associated protein 52 homolog (Fragment) OS=Mus musculus OX=10090 GN=Vps52 PE=1 SV=2	-0.120776	0.0268212	-0.118112	0.0292991	0.00266408	0.0709139	0.144532	0.073578	0.132187
Vacuolar protein sorting-associated protein 51 homolog	Vps51	NO	sp|Q3UVL4|VPS51_MOUSE Vacuolar protein sorting-associated protein 51 homolog OS=Mus musculus OX=10090 GN=Vps51 PE=1 SV=2	-0.0469424	0.261134	-0.13634	0.00949496	-0.0893976	0.215718	0.00083349	0.12632	0.0134979
Vacuolar protein sorting-associated protein 4B	Vps4b	YES	sp|P46467|VPS4B_MOUSE Vacuolar protein sorting-associated protein 4B OS=Mus musculus OX=10090 GN=Vps4b PE=1 SV=2	-0.0068049	0.817587	0.00527703	0.857931	0.0120819	0.00799234	0.78663	0.0200743	0.502802
Vacuolar protein sorting-associated protein 4A	Vps4a	NO	sp|Q8VEJ9|VPS4A_MOUSE Vacuolar protein sorting-associated protein 4A OS=Mus musculus OX=10090 GN=Vps4a PE=1 SV=1	-0.05805	0.170746	-0.116319	0.018542	-0.0582686	0.0252137	0.528229	-0.0330549	0.413262
Vacuolar protein sorting-associated protein 45	Vps45	NO	sp|P97390|VPS45_MOUSE Vacuolar protein sorting-associated protein 45 OS=Mus musculus OX=10090 GN=Vps45 PE=1 SV=1	-0.0575685	0.132609	-0.0857218	0.0391898	-0.0281534	0.0805234	0.049037	0.0523701	0.165477
Vacuolar protein sorting-associated protein 41 homolog	Vps41	NO	sp|Q5KU39|VPS41_MOUSE Vacuolar protein sorting-associated protein 41 homolog OS=Mus musculus OX=10090 GN=Vps41 PE=1 SV=1	-0.055673	0.1115	-0.0194061	0.545413	0.0362668	-0.00694606	0.826579	0.0293208	0.369177
Vam6/Vps39-like protein	Vps39	NO	sp|Q8R5L3|VPS39_MOUSE Vam6/Vps39-like protein OS=Mus musculus OX=10090 GN=Vps39 PE=1 SV=1	-0.034207	0.328577	-0.114566	0.00993316	-0.0803591	0.0591403	0.112579	-0.0212188	0.535475
Vacuolar protein sorting-associated protein 37C	Vps37c	NO	sp|Q8R105|VP37C_MOUSE Vacuolar protein sorting-associated protein 37C OS=Mus musculus OX=10090 GN=Vps37c PE=1 SV=1	-0.168063	0.00649027	-0.0951374	0.0664504	0.0729252	0.0496948	0.293392	0.12262	0.0266654
Vacuolar protein sorting-associated protein 37B	Vps37b	YES	sp|Q8R0J7|VP37B_MOUSE Vacuolar protein sorting-associated protein 37B OS=Mus musculus OX=10090 GN=Vps37b PE=1 SV=1	0.0102204	0.747077	0.0741883	0.0454319	0.0639679	-0.0197386	0.537739	0.0442293	0.190179
Vacuolar protein sorting-associated protein 37A	Vps37a	NO	sp|Q8CHS8|VP37A_MOUSE Vacuolar protein sorting-associated protein 37A OS=Mus musculus OX=10090 GN=Vps37a PE=1 SV=1	0.0241167	0.625802	-0.0989492	0.075129	-0.123066	-0.0500104	0.325642	-0.173076	0.008242
Vacuolar protein-sorting-associated protein 36	Vps36	NO	sp|Q91XD6|VPS36_MOUSE Vacuolar protein-sorting-associated protein 36 OS=Mus musculus OX=10090 GN=Vps36 PE=1 SV=1	0.0447113	0.173496	-0.0048314	0.874445	-0.0495427	0.0506381	0.129943	0.00109546	0.971394
Vacuolar protein sorting-associated protein 35	Vps35	NO	sp|Q9EQH3|VPS35_MOUSE Vacuolar protein sorting-associated protein 35 OS=Mus musculus OX=10090 GN=Vps35 PE=1 SV=1	-0.0357294	0.523812	-0.0101088	0.854817	0.0256206	0.0081215	0.883076	0.0337421	0.546495
Vacuolar protein sorting-associated protein 33B	Vps33b	NO	sp|P59016|VP33B_MOUSE Vacuolar protein sorting-associated protein 33B OS=Mus musculus OX=10090 GN=Vps33b PE=1 SV=1	-0.0941027	0.0145318	-0.0875698	0.0198535	0.00653295	0.0430257	0.182706	0.0495586	0.132362
Vacuolar protein sorting-associated protein 33A	Vps33a	NO	sp|Q9D2N9|VP33A_MOUSE Vacuolar protein sorting-associated protein 33A OS=Mus musculus OX=10090 GN=Vps33a PE=1 SV=2	-0.112127	0.00823519	-0.0612942	0.0859202	0.0508331	0.0544203	0.119311	0.105253	0.0110969
Vacuolar protein sorting-associated protein 29	Vps29	YES	tr|D3Z645|D3Z645_MOUSE Vacuolar protein sorting-associated protein 29 OS=Mus musculus OX=10090 GN=Vps29 PE=1 SV=1;sp|Q9QZ88|VPS29_MOUSE Vacuolar protein sorting-associated protein 29 OS=Mus musculus OX=10090 GN=Vps29 PE=1 SV=1;tr|D3YYD5|D3YYD5_MOUSE Vacuol	-0.0369202	0.186172	-0.0473297	0.102489	-0.0104095	0.0509392	0.0830504	0.0405297	0.151732
Vacuolar protein sorting-associated protein 28 homolog	Vps28	NO	sp|Q9D1C8|VPS28_MOUSE Vacuolar protein sorting-associated protein 28 homolog OS=Mus musculus OX=10090 GN=Vps28 PE=1 SV=1;tr|A0A2R8VKS6|A0A2R8VKS6_MOUSE Vacuolar protein sorting-associated protein 28 homolog OS=Mus musculus OX=10090 GN=Vps28 PE=1 SV=1	-0.136644	0.0116858	-0.0696815	0.127178	0.0669622	0.101787	0.0395377	0.168749	0.00416641
Vacuolar protein sorting-associated protein 26B	Vps26b	YES	sp|Q8C0E2|VP26B_MOUSE Vacuolar protein sorting-associated protein 26B OS=Mus musculus OX=10090 GN=Vps26b PE=1 SV=1	-0.113108	0.0577793	0.0168874	0.7445	0.129995	-0.125634	0.0400168	0.00436155	0.932665
Vacuolar protein sorting-associated protein 26A	Vps26a	YES	sp|P40336|VP26A_MOUSE Vacuolar protein sorting-associated protein 26A OS=Mus musculus OX=10090 GN=Vps26a PE=1 SV=1;tr|A0A1W2P7Z9|A0A1W2P7Z9_MOUSE Vacuolar protein sorting-associated protein 26A (Fragment) OS=Mus musculus OX=10090 GN=Vps26a PE=1 SV=1	-0.0178385	0.606514	0.0050194	0.883688	0.0228579	0.162848	0.00177041	0.185706	0.000840143
Vacuolar protein-sorting-associated protein 25	Vps25	NO	tr|A2A4J8|A2A4J8_MOUSE Vacuolar protein-sorting-associated protein 25 OS=Mus musculus OX=10090 GN=Vps25 PE=1 SV=1;sp|Q9CQ80|VPS25_MOUSE Vacuolar protein-sorting-associated protein 25 OS=Mus musculus OX=10090 GN=Vps25 PE=1 SV=1;tr|A8XY17|A8XY17_MOUSE Vacuol	0.0253704	0.615186	0.000746707	0.98808	-0.0246237	0.2638	0.00097632	0.239176	0.00169959
Vacuolar protein sorting-associated protein 18 homolog	Vps18	NO	sp|Q8R307|VPS18_MOUSE Vacuolar protein sorting-associated protein 18 homolog OS=Mus musculus OX=10090 GN=Vps18 PE=1 SV=2	-0.00768474	0.859042	-0.122051	0.0224269	-0.114366	0.118581	0.0252347	0.0042151	0.922335
Vacuolar protein sorting-associated protein 16 homolog	Vps16	NO	tr|G3X8X7|G3X8X7_MOUSE Vacuolar protein sorting 16 (Yeast) OS=Mus musculus OX=10090 GN=Vps16 PE=1 SV=1;sp|Q920Q4|VPS16_MOUSE Vacuolar protein sorting-associated protein 16 homolog OS=Mus musculus OX=10090 GN=Vps16 PE=1 SV=3	-0.0865368	0.0944983	-0.0372703	0.432039	0.0492665	0.00215039	0.962972	0.0514169	0.288046
	Vps13d	NO	tr|B1ART1|B1ART1_MOUSE Vacuolar protein sorting 13D OS=Mus musculus OX=10090 GN=Vps13d PE=1 SV=1;tr|B1ART2|B1ART2_MOUSE Vacuolar protein sorting 13D OS=Mus musculus OX=10090 GN=Vps13d PE=1 SV=2;tr|V9GX23|V9GX23_MOUSE Vacuolar protein sorting 13D (Fragment)	0.169806	0.00127783	-0.0187564	0.58252	-0.188562	0.0803509	0.0432769	-0.108211	0.012899
Vacuolar protein sorting-associated protein 13C	Vps13c	NO	sp|Q8BX70|VP13C_MOUSE Vacuolar protein sorting-associated protein 13C OS=Mus musculus OX=10090 GN=Vps13c PE=1 SV=2	0.0779764	0.019549	0.0193116	0.478434	-0.0586648	0.00842281	0.753504	-0.050242	0.0928117
Vacuolar protein sorting-associated protein 13B	Vps13b	NO	sp|Q80TY5|VP13B_MOUSE Vacuolar protein sorting-associated protein 13B OS=Mus musculus OX=10090 GN=Vps13b PE=1 SV=3	0.0512666	0.31949	-0.13567	0.0254526	-0.186936	0.364111	0.000133046	0.177175	0.00776796
Vacuolar protein sorting-associated protein 13A	Vps13a	NO	sp|Q5H8C4|VP13A_MOUSE Vacuolar protein sorting-associated protein 13A OS=Mus musculus OX=10090 GN=Vps13a PE=1 SV=1;tr|A0A286YCT3|A0A286YCT3_MOUSE Vacuolar protein sorting-associated protein 13A OS=Mus musculus OX=10090 GN=Vps13a PE=1 SV=1	0.0198364	0.528594	-0.0777111	0.0358952	-0.0975475	0.0798168	0.0324268	-0.0177307	0.572099
Vacuolar protein sorting-associated protein 11 homolog	Vps11	NO	sp|Q91W86|VPS11_MOUSE Vacuolar protein sorting-associated protein 11 homolog OS=Mus musculus OX=10090 GN=Vps11 PE=1 SV=3	-0.0103356	0.707256	-0.109626	0.00440973	-0.0992901	-0.0231153	0.410719	-0.122405	0.00246446
Vascular non-inflammatory molecule 3	Vnn3	NO	sp|Q9QZ25|VNN3_MOUSE Vascular non-inflammatory molecule 3 OS=Mus musculus OX=10090 GN=Vnn3 PE=1 SV=3	0.000969982	0.994176	0.401756	0.0167942	0.400786	1.96018	1.39451e-06	2.36096	3.96466e-07
Vacuole membrane protein 1	Vmp1	NO	sp|Q99KU0|VMP1_MOUSE Vacuole membrane protein 1 OS=Mus musculus OX=10090 GN=Vmp1 PE=1 SV=2;tr|Q5SXR2|Q5SXR2_MOUSE Vacuole membrane protein 1 (Fragment) OS=Mus musculus OX=10090 GN=Vmp1 PE=1 SV=1	-0.257315	0.0252305	-0.170773	0.101545	0.0865421	-0.0545605	0.565667	0.0319816	0.734216
Vacuolar ATPase assembly integral membrane protein Vma21	Vma21	YES	sp|Q78T54|VMA21_MOUSE Vacuolar ATPase assembly integral membrane protein Vma21 OS=Mus musculus OX=10090 GN=Vma21 PE=1 SV=1	-0.182168	0.321734	0.0439795	0.80418	0.226148	0.193828	0.294002	0.419976	0.0438828
Vitamin K epoxide reductase complex subunit 1-like protein 1	Vkorc1l1	YES	sp|Q6TEK5|VKORL_MOUSE Vitamin K epoxide reductase complex subunit 1-like protein 1 OS=Mus musculus OX=10090 GN=Vkorc1l1 PE=1 SV=1;tr|A0A0M3HEP8|A0A0M3HEP8_MOUSE Vitamin K epoxide reductase complex subunit 1-like protein 1 OS=Mus musculus OX=10090 GN=Vkorc1	-0.0267488	0.594583	0.0339521	0.502115	0.0607009	0.0822832	0.13046	0.142984	0.0207835
Vitamin K epoxide reductase complex subunit 1	Vkorc1	NO	sp|Q9CRC0|VKOR1_MOUSE Vitamin K epoxide reductase complex subunit 1 OS=Mus musculus OX=10090 GN=Vkorc1 PE=1 SV=1	0.00825962	0.934499	-0.151201	0.163257	-0.15946	0.471958	0.00188358	0.312498	0.0148289
Spermatogenesis-defective protein 39 homolog	Vipas39	NO	sp|Q8BGQ1|SPE39_MOUSE Spermatogenesis-defective protein 39 homolog OS=Mus musculus OX=10090 GN=Vipas39 PE=1 SV=1	-0.104255	0.00668343	-0.048211	0.120994	0.0560443	-0.112291	0.00460291	-0.0562472	0.0786154
Selenoprotein S	Vimp	NO	sp|Q9BCZ4|SELS_MOUSE Selenoprotein S OS=Mus musculus OX=10090 GN=Selenos PE=1 SV=3;tr|A0A0U1RP62|A0A0U1RP62_MOUSE Histocompatibility 47, isoform CRA_b OS=Mus musculus OX=10090 GN=Selenos PE=1 SV=1;tr|A0A0U1RPI8|A0A0U1RPI8_MOUSE Selenoprotein S OS=Mus muscu	0.0635374	0.114807	0.111253	0.0162419	0.0477155	-0.245571	0.000230477	-0.197855	0.000839138
Vimentin	Vim	NO	tr|A0A0A6YWC8|A0A0A6YWC8_MOUSE Vimentin OS=Mus musculus OX=10090 GN=Vim PE=1 SV=1;sp|P20152|VIME_MOUSE Vimentin OS=Mus musculus OX=10090 GN=Vim PE=1 SV=3;tr|A2AKJ2|A2AKJ2_MOUSE Vimentin (Fragment) OS=Mus musculus OX=10090 GN=Vim PE=1 SV=2	-0.072783	0.743244	0.182717	0.420672	0.2555	-0.472351	0.0630231	-0.216851	0.343902
Von Hippel-Lindau disease tumor suppressor	Vhl	YES	sp|P40338|VHL_MOUSE von Hippel-Lindau disease tumor suppressor OS=Mus musculus OX=10090 GN=Vhl PE=1 SV=1	-0.161395	0.361349	-0.213728	0.237135	-0.0523336	0.152474	0.386925	0.100141	0.563607
Voltage-dependent anion-selective channel protein 3	Vdac3	NO	sp|Q60931|VDAC3_MOUSE Voltage-dependent anion-selective channel protein 3 OS=Mus musculus OX=10090 GN=Vdac3 PE=1 SV=1;tr|J3QMG3|J3QMG3_MOUSE Voltage-dependent anion-selective channel protein 3 OS=Mus musculus OX=10090 GN=Vdac3 PE=1 SV=1	0.047985	0.206742	-0.0470792	0.21447	-0.0950642	0.209342	0.000528098	0.114278	0.0130481
	Vdac2	NO	tr|G3UX26|G3UX26_MOUSE Voltage-dependent anion-selective channel protein 2 OS=Mus musculus OX=10090 GN=Vdac2 PE=1 SV=1	-0.0450699	0.516968	0.0670302	0.344109	0.1121	0.237727	0.00891958	0.349827	0.00117215
Voltage-dependent anion-selective channel protein 2	Vdac2	NO	sp|Q60930|VDAC2_MOUSE Voltage-dependent anion-selective channel protein 2 OS=Mus musculus OX=10090 GN=Vdac2 PE=1 SV=2;tr|A0A286YCR8|A0A286YCR8_MOUSE Voltage-dependent anion-selective channel protein 2 (Fragment) OS=Mus musculus OX=10090 GN=Vdac2 PE=1 SV=1;	-0.0502546	0.426301	-0.054936	0.386657	-0.00468142	0.101435	0.132348	0.0967541	0.14828
Voltage-dependent anion-selective channel protein 1	Vdac1	NO	sp|Q60932|VDAC1_MOUSE Voltage-dependent anion-selective channel protein 1 OS=Mus musculus OX=10090 GN=Vdac1 PE=1 SV=3	-0.00419033	0.901991	0.0164005	0.632622	0.0205909	0.173788	0.00117445	0.194379	0.000613715
Protein-lysine methyltransferase METTL21D	Vcpkmt	NO	sp|Q8C436|MT21D_MOUSE Protein-lysine methyltransferase METTL21D OS=Mus musculus OX=10090 GN=Vcpkmt PE=2 SV=2	0.236122	0.0270126	0.106303	0.248874	-0.129819	0.122723	0.189935	-0.00709581	0.935404
Deubiquitinating protein VCIP135	Vcpip1	YES	tr|A0A0R4J0M9|A0A0R4J0M9_MOUSE Deubiquitinating protein VCIP135 OS=Mus musculus OX=10090 GN=Vcpip1 PE=1 SV=1;sp|Q8CDG3|VCIP1_MOUSE Deubiquitinating protein VCIP135 OS=Mus musculus OX=10090 GN=Vcpip1 PE=1 SV=1	-0.0637171	0.114526	0.0102237	0.780545	0.0739409	-0.186062	0.00120732	-0.112121	0.0158286
Transitional endoplasmic reticulum ATPase	Vcp	YES	sp|Q01853|TERA_MOUSE Transitional endoplasmic reticulum ATPase OS=Mus musculus OX=10090 GN=Vcp PE=1 SV=4	-0.0188629	0.452066	-0.0259152	0.310328	-0.00705232	0.0618474	0.0351888	0.0547951	0.0542931
Vinculin	Vcl	YES	sp|Q64727|VINC_MOUSE Vinculin OS=Mus musculus OX=10090 GN=Vcl PE=1 SV=4	-0.00894797	0.842099	0.0147423	0.743397	0.0236903	0.0493072	0.29235	0.0729975	0.135954
Prefoldin subunit 3	Vbp1	YES	sp|P61759|PFD3_MOUSE Prefoldin subunit 3 OS=Mus musculus OX=10090 GN=Vbp1 PE=1 SV=2;tr|Q3TIR6|Q3TIR6_MOUSE Prefoldin subunit 3 OS=Mus musculus OX=10090 GN=Vbp1 PE=1 SV=1	-0.0941739	0.0291987	-0.0893218	0.0357848	0.00485211	0.0151093	0.673392	0.0199614	0.579525
Guanine nucleotide exchange factor VAV3	Vav3	NO	sp|Q9R0C8|VAV3_MOUSE Guanine nucleotide exchange factor VAV3 OS=Mus musculus OX=10090 GN=Vav3 PE=1 SV=2	0.00557505	0.874621	0.02966	0.412929	0.024085	-0.0207923	0.560956	0.00329267	0.925704
Guanine nucleotide exchange factor VAV2	Vav2	NO	tr|Q7TSI6|Q7TSI6_MOUSE Guanine nucleotide exchange factor VAV2 OS=Mus musculus OX=10090 GN=Vav2 PE=1 SV=1;sp|Q60992|VAV2_MOUSE Guanine nucleotide exchange factor VAV2 OS=Mus musculus OX=10090 GN=Vav2 PE=1 SV=1	-0.0458074	0.681365	-0.11885	0.303476	-0.073043	0.0638851	0.56921	-0.00915797	0.934169
Proto-oncogene vav	Vav1	NO	sp|P27870|VAV_MOUSE Proto-oncogene vav OS=Mus musculus OX=10090 GN=Vav1 PE=1 SV=1;tr|E9PXI0|E9PXI0_MOUSE Proto-oncogene vav OS=Mus musculus OX=10090 GN=Vav1 PE=1 SV=1;tr|Q8VDU4|Q8VDU4_MOUSE Proto-oncogene vav OS=Mus musculus OX=10090 GN=Vav1 PE=1 SV=1	-0.110247	0.0102143	-0.0928533	0.0218132	0.0173935	-0.0672586	0.070675	-0.0498651	0.158042
Synaptic vesicle membrane protein VAT-1 homolog	Vat1	NO	sp|Q62465|VAT1_MOUSE Synaptic vesicle membrane protein VAT-1 homolog OS=Mus musculus OX=10090 GN=Vat1 PE=1 SV=3	-0.0707037	0.0371244	-0.0690667	0.0404783	0.00163701	0.0757545	0.0284843	0.0773916	0.0261592
Vasodilator-stimulated phosphoprotein	Vasp	YES	sp|P70460|VASP_MOUSE Vasodilator-stimulated phosphoprotein OS=Mus musculus OX=10090 GN=Vasp PE=1 SV=4	0.237694	0.000495255	0.280913	0.000179317	0.0432197	-0.452943	8.29884e-06	-0.409723	1.60606e-05
Vasohibin-1	Vash1	NO	sp|Q8C1W1|VASH1_MOUSE Vasohibin-1 OS=Mus musculus OX=10090 GN=Vash1 PE=2 SV=4	-0.0897639	0.224019	-0.0838523	0.252808	0.00591158	-0.0510004	0.473057	-0.0450889	0.524102
Valine--tRNA ligase, mitochondrial	Vars2	NO	sp|Q3U2A8|SYVM_MOUSE Valine--tRNA ligase, mitochondrial OS=Mus musculus OX=10090 GN=Vars2 PE=1 SV=2	-0.0236185	0.445919	-0.132693	0.00275674	-0.109074	-0.0109608	0.718867	-0.120035	0.00466091
Valine--tRNA ligase	Vars	NO	sp|Q9Z1Q9|SYVC_MOUSE Valine--tRNA ligase OS=Mus musculus OX=10090 GN=Vars PE=1 SV=1;tr|G3UY93|G3UY93_MOUSE Valine--tRNA ligase (Fragment) OS=Mus musculus OX=10090 GN=Vars PE=1 SV=1	-0.107111	0.00649784	-0.0224052	0.448058	0.084706	0.0148025	0.611843	0.0995085	0.00927753
Vesicle-associated membrane protein-associated protein B	Vapb	NO	tr|Q8BH80|Q8BH80_MOUSE Vesicle-associated membrane protein, associated protein B and C OS=Mus musculus OX=10090 GN=Vapb PE=1 SV=1;sp|Q9QY76|VAPB_MOUSE Vesicle-associated membrane protein-associated protein B OS=Mus musculus OX=10090 GN=Vapb PE=1 SV=3	0.0574359	0.426174	0.0969449	0.197175	0.039509	-0.409415	0.000555497	-0.369906	0.00100439
Vesicle-associated membrane protein-associated protein A	Vapa	YES	sp|Q9WV55|VAPA_MOUSE Vesicle-associated membrane protein-associated protein A OS=Mus musculus OX=10090 GN=Vapa PE=1 SV=2	0.0303659	0.516165	-0.00721211	0.87557	-0.037578	0.025815	0.579299	-0.011763	0.798725
Vesicle-associated membrane protein 8	Vamp8	NO	tr|A0A0R4J0R1|A0A0R4J0R1_MOUSE Vesicle-associated membrane protein 8 OS=Mus musculus OX=10090 GN=Vamp8 PE=1 SV=1;sp|O70404|VAMP8_MOUSE Vesicle-associated membrane protein 8 OS=Mus musculus OX=10090 GN=Vamp8 PE=1 SV=1;tr|A0A0U1RPE8|A0A0U1RPE8_MOUSE Vesicle-	0.156512	0.026715	-0.083516	0.178749	-0.240028	-0.109536	0.0910035	-0.349565	0.000441392
Vesicle-associated membrane protein 7	Vamp7	NO	sp|P70280|VAMP7_MOUSE Vesicle-associated membrane protein 7 OS=Mus musculus OX=10090 GN=Vamp7 PE=1 SV=1	-0.0655779	0.121839	-0.0475675	0.242248	0.0180105	-0.0408805	0.308576	-0.02287	0.558363
Vesicle-associated membrane protein 5	Vamp5	NO	sp|Q9Z2P8|VAMP5_MOUSE Vesicle-associated membrane protein 5 OS=Mus musculus OX=10090 GN=Vamp5 PE=1 SV=1;tr|A0A0U1RP87|A0A0U1RP87_MOUSE Vesicle-associated membrane protein 5 OS=Mus musculus OX=10090 GN=Vamp5 PE=1 SV=1	0.181162	0.021073	-0.0441627	0.492578	-0.225324	-0.393699	0.000367183	-0.619023	2.11405e-05
Vesicle-associated membrane protein 3	Vamp3	NO	sp|P63024|VAMP3_MOUSE Vesicle-associated membrane protein 3 OS=Mus musculus OX=10090 GN=Vamp3 PE=1 SV=1	0.284562	0.00938162	-0.0643638	0.447106	-0.348926	0.0799583	0.350474	-0.268968	0.0121894
Vesicle-associated membrane protein 2	Vamp2	NO	tr|B0QZN5|B0QZN5_MOUSE Vesicle-associated membrane protein 2 OS=Mus musculus OX=10090 GN=Vamp2 PE=1 SV=1;sp|P63044|VAMP2_MOUSE Vesicle-associated membrane protein 2 OS=Mus musculus OX=10090 GN=Vamp2 PE=1 SV=2	0.0148344	0.870071	-0.115304	0.229075	-0.130138	-0.549276	0.000432351	-0.679414	0.00011711
Protein VAC14 homolog	Vac14	NO	sp|Q80WQ2|VAC14_MOUSE Protein VAC14 homolog OS=Mus musculus OX=10090 GN=Vac14 PE=1 SV=1;tr|A0A1D5RLY2|A0A1D5RLY2_MOUSE Protein VAC14 homolog OS=Mus musculus OX=10090 GN=Vac14 PE=1 SV=1	-0.0366173	0.42762	0.0478845	0.307382	0.0845018	0.0125506	0.781189	0.0970524	0.0611585
UDP-glucuronic acid decarboxylase 1	Uxs1	YES	sp|Q91XL3|UXS1_MOUSE UDP-glucuronic acid decarboxylase 1 OS=Mus musculus OX=10090 GN=Uxs1 PE=1 SV=1;tr|D3YUF9|D3YUF9_MOUSE UDP-glucuronic acid decarboxylase 1 (Fragment) OS=Mus musculus OX=10090 GN=Uxs1 PE=1 SV=1	0.090914	0.0363142	0.33046	3.44954e-05	0.239546	-0.649553	3.83346e-07	-0.410008	8.41082e-06
	Uvrag	NO	sp|Q8K245|UVRAG_MOUSE UV radiation resistance associated protein OS=Mus musculus OX=10090 GN=Uvrag PE=1 SV=2	-0.0939023	0.0531869	-0.0651961	0.150512	0.0287062	0.0767078	0.0994206	0.105414	0.0351055
	Utrn	NO	tr|E9Q6R7|E9Q6R7_MOUSE Utrophin OS=Mus musculus OX=10090 GN=Utrn PE=1 SV=1	-0.0320643	0.340283	0.000160483	0.996055	0.0322248	-0.0567072	0.113571	-0.0244824	0.460183
Ubiquitin carboxyl-terminal hydrolase	Usp9y	NO	tr|F8VPU6|F8VPU6_MOUSE Ubiquitin-specific peptidase 9, Y chromosome OS=Mus musculus OX=10090 GN=Usp9y PE=1 SV=1	0.0290195	0.748178	0.189867	0.0655431	0.160848	-0.0744544	0.420008	0.0863932	0.353392
	Usp9x	YES	tr|G3UY52|G3UY52_MOUSE Probable ubiquitin carboxyl-terminal hydrolase FAF-X (Fragment) OS=Mus musculus OX=10090 GN=Usp9x PE=1 SV=1	-0.0350529	0.753112	-0.00976156	0.929956	0.0252914	0.010574	0.924147	0.0358654	0.747626
	Usp9x	YES	tr|G3UZS3|G3UZS3_MOUSE Probable ubiquitin carboxyl-terminal hydrolase FAF-X (Fragment) OS=Mus musculus OX=10090 GN=Usp9x PE=1 SV=1	-0.00858919	0.87308	-0.0625976	0.266709	-0.0540084	0.0773232	0.179791	0.0233148	0.666499
Ubiquitin carboxyl-terminal hydrolase;Probable ubiquitin carboxyl-terminal hydrolase FAF-X	Usp9x	YES	tr|Q4FE56|Q4FE56_MOUSE Probable ubiquitin carboxyl-terminal hydrolase FAF-X OS=Mus musculus OX=10090 GN=Usp9x PE=1 SV=1;sp|P70398|USP9X_MOUSE Probable ubiquitin carboxyl-terminal hydrolase FAF-X OS=Mus musculus OX=10090 GN=Usp9x PE=1 SV=2	0.00946829	0.729067	0.00172153	0.949561	-0.00774676	0.0391248	0.180226	0.031378	0.271304
Ubiquitin carboxyl-terminal hydrolase;Ubiquitin carboxyl-terminal hydrolase 8	Usp8	NO	tr|A2AI52|A2AI52_MOUSE Ubiquitin carboxyl-terminal hydrolase 8 OS=Mus musculus OX=10090 GN=Usp8 PE=1 SV=1;sp|Q80U87|UBP8_MOUSE Ubiquitin carboxyl-terminal hydrolase 8 OS=Mus musculus OX=10090 GN=Usp8 PE=1 SV=2	0.0305667	0.390531	0.0512493	0.169036	0.0206826	-0.0053121	0.878076	0.0153705	0.659231
Ubiquitin carboxyl-terminal hydrolase;Ubiquitin carboxyl-terminal hydrolase 7	Usp7	YES	tr|F8VPX1|F8VPX1_MOUSE Ubiquitin carboxyl-terminal hydrolase 7 OS=Mus musculus OX=10090 GN=Usp7 PE=1 SV=1;tr|E9PXY8|E9PXY8_MOUSE Ubiquitin carboxyl-terminal hydrolase 7 OS=Mus musculus OX=10090 GN=Usp7 PE=1 SV=1;sp|Q6A4J8|UBP7_MOUSE Ubiquitin carboxyl-term	0.069498	0.0196708	0.0570735	0.0425977	-0.0124244	-0.0260008	0.296102	-0.0384252	0.139365
USP6 N-terminal-like protein	Usp6nl	YES	sp|Q80XC3|US6NL_MOUSE USP6 N-terminal-like protein OS=Mus musculus OX=10090 GN=Usp6nl PE=1 SV=2	-0.0805363	0.043123	-0.0896215	0.0288221	-0.00908514	-0.201862	0.000470514	-0.210947	0.000361221
Inactive ubiquitin carboxyl-terminal hydrolase 54	Usp54	NO	sp|Q8BL06|UBP54_MOUSE Inactive ubiquitin carboxyl-terminal hydrolase 54 OS=Mus musculus OX=10090 GN=Usp54 PE=1 SV=2	-0.0482896	0.707022	-0.0460495	0.719896	0.0022401	-0.565019	0.00261871	-0.562779	0.00267525
	Usp5	NO	tr|D3YYA5|D3YYA5_MOUSE Ubiquitin carboxyl-terminal hydrolase 5 (Fragment) OS=Mus musculus OX=10090 GN=Usp5 PE=1 SV=1	0.0119751	0.855521	-0.0855365	0.21956	-0.0975116	0.495914	0.000112251	0.398403	0.000431225
Ubiquitin carboxyl-terminal hydrolase;Ubiquitin carboxyl-terminal hydrolase 5	Usp5	NO	tr|Q3U4W8|Q3U4W8_MOUSE Ubiquitin carboxyl-terminal hydrolase OS=Mus musculus OX=10090 GN=Usp5 PE=1 SV=1;sp|P56399|UBP5_MOUSE Ubiquitin carboxyl-terminal hydrolase 5 OS=Mus musculus OX=10090 GN=Usp5 PE=1 SV=1	-0.0642873	0.469001	-0.0877734	0.330805	-0.0234861	0.142962	0.132811	0.119476	0.198092
Ubiquitin carboxyl-terminal hydrolase 47	Usp47	NO	tr|A0A1L1SV73|A0A1L1SV73_MOUSE Ubiquitin carboxyl-terminal hydrolase 47 OS=Mus musculus OX=10090 GN=Usp47 PE=1 SV=1;sp|Q8BY87|UBP47_MOUSE Ubiquitin carboxyl-terminal hydrolase 47 OS=Mus musculus OX=10090 GN=Usp47 PE=1 SV=2	-0.244567	0.0228433	-0.205032	0.0449772	0.0395348	-0.067076	0.450667	-0.0275411	0.752462
Ubiquitin carboxyl-terminal hydrolase 46	Usp46	NO	tr|D3YVU0|D3YVU0_MOUSE Ubiquitin carboxyl-terminal hydrolase 46 OS=Mus musculus OX=10090 GN=Usp46 PE=1 SV=1;sp|P62069|UBP46_MOUSE Ubiquitin carboxyl-terminal hydrolase 46 OS=Mus musculus OX=10090 GN=Usp46 PE=1 SV=1	-0.0640088	0.268468	0.000953413	0.986207	0.0649622	-0.087628	0.144053	-0.0226658	0.683
Ubiquitin carboxyl-terminal hydrolase 45	Usp45	YES	sp|Q8K387|UBP45_MOUSE Ubiquitin carboxyl-terminal hydrolase 45 OS=Mus musculus OX=10090 GN=Usp45 PE=1 SV=1	0.0610373	0.259159	0.0173722	0.736842	-0.0436651	-0.224172	0.0028409	-0.267837	0.0010594
Ubiquitin carboxyl-terminal hydrolase 4;Ubiquitin carboxyl-terminal hydrolase	Usp4	NO	sp|P35123|UBP4_MOUSE Ubiquitin carboxyl-terminal hydrolase 4 OS=Mus musculus OX=10090 GN=Usp4 PE=1 SV=3;tr|A0A0A6YW28|A0A0A6YW28_MOUSE Ubiquitin carboxyl-terminal hydrolase 4 OS=Mus musculus OX=10090 GN=Usp4 PE=1 SV=1;tr|A0A0A6YVY7|A0A0A6YVY7_MOUSE Ubiquit	0.00147976	0.956788	-0.0594515	0.0590703	-0.0609313	0.0304693	0.285783	-0.030462	0.285889
Ubiquitin carboxyl-terminal hydrolase 33	Usp33	NO	tr|A0A0H2UKB8|A0A0H2UKB8_MOUSE Ubiquitinyl hydrolase 1 OS=Mus musculus OX=10090 GN=Usp33 PE=1 SV=1;sp|Q8R5K2|UBP33_MOUSE Ubiquitin carboxyl-terminal hydrolase 33 OS=Mus musculus OX=10090 GN=Usp33 PE=1 SV=2	-0.0325945	0.364532	0.0301197	0.399982	0.0627143	-0.246939	0.000165912	-0.184225	0.000962505
Ubiquitin carboxyl-terminal hydrolase	Usp32	YES	tr|F8VPZ3|F8VPZ3_MOUSE Ubiquitin-specific peptidase 32 OS=Mus musculus OX=10090 GN=Usp32 PE=1 SV=1	-0.0515036	0.192746	-0.0705962	0.0889709	-0.0190926	0.0664146	0.105623	0.047322	0.227006
Ubiquitin carboxyl-terminal hydrolase	Usp31	YES	tr|E9Q6Y8|E9Q6Y8_MOUSE Ubiquitin-specific peptidase 31 OS=Mus musculus OX=10090 GN=Usp31 PE=1 SV=1	0.283289	0.00598522	-0.111728	0.167626	-0.395016	0.543353	0.000146977	0.148337	0.0804434
Ubiquitin carboxyl-terminal hydrolase 30	Usp30	NO	tr|A0A0G2JDF7|A0A0G2JDF7_MOUSE Ubiquitin carboxyl-terminal hydrolase 30 (Fragment) OS=Mus musculus OX=10090 GN=Usp30 PE=1 SV=1;sp|Q3UN04|UBP30_MOUSE Ubiquitin carboxyl-terminal hydrolase 30 OS=Mus musculus OX=10090 GN=Usp30 PE=1 SV=1	0.326852	0.00355303	0.0845271	0.300394	-0.242325	0.313913	0.00438255	0.0715881	0.3751
Ubiquitin carboxyl-terminal hydrolase 25	Usp25	NO	sp|P57080|UBP25_MOUSE Ubiquitin carboxyl-terminal hydrolase 25 OS=Mus musculus OX=10090 GN=Usp25 PE=1 SV=2	0.0498549	0.265916	0.073021	0.120114	0.0231662	-0.141214	0.0112363	-0.118048	0.024477
Ubiquitin carboxyl-terminal hydrolase;Ubiquitin carboxyl-terminal hydrolase 24	Usp24	YES	tr|E9PV45|E9PV45_MOUSE Ubiquitin carboxyl-terminal hydrolase 24 OS=Mus musculus OX=10090 GN=Usp24 PE=1 SV=1;sp|B1AY13|UBP24_MOUSE Ubiquitin carboxyl-terminal hydrolase 24 OS=Mus musculus OX=10090 GN=Usp24 PE=1 SV=1	-0.0737843	0.026736	-0.033399	0.245451	0.0403853	0.0389352	0.183077	0.0793205	0.0198542
Ubiquitin carboxyl-terminal hydrolase;Ubiquitin carboxyl-terminal hydrolase 19	Usp19	YES	tr|J3KMM1|J3KMM1_MOUSE Ubiquitin carboxyl-terminal hydrolase 19 OS=Mus musculus OX=10090 GN=Usp19 PE=1 SV=1;tr|E9Q9M5|E9Q9M5_MOUSE Ubiquitin carboxyl-terminal hydrolase 19 OS=Mus musculus OX=10090 GN=Usp19 PE=1 SV=1;tr|A0A0A6YWX1|A0A0A6YWX1_MOUSE Ubiquitin	-0.00905865	0.810442	-0.0516333	0.198985	-0.0425747	-0.0349867	0.368257	-0.0775613	0.0707927
Ubiquitinyl hydrolase 1;Ubiquitin carboxyl-terminal hydrolase 16	Usp16	YES	tr|D3YVU1|D3YVU1_MOUSE Ubiquitinyl hydrolase 1 OS=Mus musculus OX=10090 GN=Usp16 PE=1 SV=1;sp|Q99LG0|UBP16_MOUSE Ubiquitin carboxyl-terminal hydrolase 16 OS=Mus musculus OX=10090 GN=Usp16 PE=1 SV=2;tr|D6RHQ6|D6RHQ6_MOUSE Ubiquitinyl hydrolase 1 OS=Mus musc	-0.103903	0.243027	0.00770497	0.927275	0.111608	-0.105378	0.237052	0.00622937	0.941168
Ubiquitin carboxyl-terminal hydrolase 15	Usp15	NO	sp|Q8R5H1|UBP15_MOUSE Ubiquitin carboxyl-terminal hydrolase 15 OS=Mus musculus OX=10090 GN=Usp15 PE=1 SV=1	-0.0837282	0.0188298	-0.039623	0.192413	0.0441051	-0.0785079	0.02462	-0.0344027	0.25058
Ubiquitin carboxyl-terminal hydrolase 14;Ubiquitin carboxyl-terminal hydrolase	Usp14	NO	sp|Q9JMA1|UBP14_MOUSE Ubiquitin carboxyl-terminal hydrolase 14 OS=Mus musculus OX=10090 GN=Usp14 PE=1 SV=3;tr|E9PYI8|E9PYI8_MOUSE Ubiquitin carboxyl-terminal hydrolase 14 OS=Mus musculus OX=10090 GN=Usp14 PE=1 SV=1	0.105531	0.00650026	0.00168646	0.952752	-0.103845	0.0408456	0.180922	-0.0629994	0.0558832
Ubiquitin carboxyl-terminal hydrolase 10	Usp10	YES	sp|P52479|UBP10_MOUSE Ubiquitin carboxyl-terminal hydrolase 10 OS=Mus musculus OX=10090 GN=Usp10 PE=1 SV=3;tr|G3X9U6|G3X9U6_MOUSE Ubiquitin carboxyl-terminal hydrolase 10 (Fragment) OS=Mus musculus OX=10090 GN=Usp10 PE=1 SV=1	-0.0427476	0.481923	-0.00992737	0.867936	0.0328203	0.0921245	0.153882	0.124945	0.0669359
General vesicular transport factor p115	Uso1	YES	sp|Q9Z1Z0|USO1_MOUSE General vesicular transport factor p115 OS=Mus musculus OX=10090 GN=Uso1 PE=1 SV=2	0.00673675	0.811492	0.0649656	0.0486555	0.0582289	0.0507863	0.104528	0.109015	0.00526572
Up-regulated during skeletal muscle growth protein 5	Usmg5	NO	sp|Q78IK2|USMG5_MOUSE Up-regulated during skeletal muscle growth protein 5 OS=Mus musculus OX=10090 GN=Usmg5 PE=1 SV=1	-0.144669	0.00140481	-0.0390573	0.208898	0.105611	0.116184	0.0045752	0.221795	0.000108507
Usherin	Ush2A	NO	sp|Q2QI47|USH2A_MOUSE Usherin OS=Mus musculus OX=10090 GN=Ush2A PE=1 SV=2	0.0596878	0.213788	-0.19296	0.00315736	-0.252648	-0.0467509	0.319554	-0.299398	0.000252679
Vesicle transport protein USE1	Use1	NO	tr|E9Q496|E9Q496_MOUSE Vesicle transport protein USE1 OS=Mus musculus OX=10090 GN=Use1 PE=1 SV=1;sp|Q9CQ56|USE1_MOUSE Vesicle transport protein USE1 OS=Mus musculus OX=10090 GN=Use1 PE=1 SV=1;tr|D3Z6D3|D3Z6D3_MOUSE Vesicle transport protein USE1 (Fragment)	-0.108996	0.186944	-0.075624	0.343742	0.0333724	-0.180799	0.0458882	-0.147426	0.0885603
Uroporphyrinogen-III synthase	Uros	NO	sp|P51163|HEM4_MOUSE Uroporphyrinogen-III synthase OS=Mus musculus OX=10090 GN=Uros PE=1 SV=1	0.212041	0.000305404	0.0635132	0.0868897	-0.148528	-0.111651	0.0101292	-0.260179	8.56887e-05
Uroporphyrinogen decarboxylase	Urod	NO	sp|P70697|DCUP_MOUSE Uroporphyrinogen decarboxylase OS=Mus musculus OX=10090 GN=Urod PE=1 SV=2	-0.0614511	0.382029	0.0720744	0.310266	0.133526	-0.0930522	0.200933	0.0404733	0.558366
Ubiquitin-related modifier 1	Urm1	NO	sp|Q9D2P4|URM1_MOUSE Ubiquitin-related modifier 1 OS=Mus musculus OX=10090 GN=Urm1 PE=1 SV=1	0.33503	0.000807745	-0.0578081	0.362181	-0.392838	-1.25133	1.56438e-07	-1.64417	2.41979e-08
Cytochrome b-c1 complex subunit 8	Uqcrq	NO	sp|Q9CQ69|QCR8_MOUSE Cytochrome b-c1 complex subunit 8 OS=Mus musculus OX=10090 GN=Uqcrq PE=1 SV=3	-0.134053	0.0108996	-0.0845773	0.0664113	0.0494758	0.0757345	0.0927613	0.12521	0.0148515
Cytochrome b-c1 complex subunit 6, mitochondrial	Uqcrh	NO	sp|P99028|QCR6_MOUSE Cytochrome b-c1 complex subunit 6, mitochondrial OS=Mus musculus OX=10090 GN=Uqcrh PE=1 SV=2	-0.0430213	0.237239	-0.107365	0.0147295	-0.0643435	0.0701604	0.0732782	0.00581696	0.866125
Cytochrome b-c1 complex subunit Rieske, mitochondrial;Cytochrome b-c1 complex subunit 11	Uqcrfs1	NO	sp|Q9CR68|UCRI_MOUSE Cytochrome b-c1 complex subunit Rieske, mitochondrial OS=Mus musculus OX=10090 GN=Uqcrfs1 PE=1 SV=1	-0.0115083	0.742106	-0.136361	0.00495042	-0.124853	0.141093	0.00415607	0.0162407	0.643727
Cytochrome b-c1 complex subunit 2, mitochondrial	Uqcrc2	NO	sp|Q9DB77|QCR2_MOUSE Cytochrome b-c1 complex subunit 2, mitochondrial OS=Mus musculus OX=10090 GN=Uqcrc2 PE=1 SV=1	-0.0239434	0.409512	-0.0489435	0.116386	-0.025	0.190114	0.000230777	0.165114	0.000540856
Cytochrome b-c1 complex subunit 1, mitochondrial	Uqcrc1	NO	sp|Q9CZ13|QCR1_MOUSE Cytochrome b-c1 complex subunit 1, mitochondrial OS=Mus musculus OX=10090 GN=Uqcrc1 PE=1 SV=2	-0.192774	0.0076575	-0.0966152	0.105264	0.0961587	0.144514	0.0273877	0.240672	0.00244868
Cytochrome b-c1 complex subunit 7	Uqcrb	NO	tr|Q9CQB4|Q9CQB4_MOUSE Cytochrome b-c1 complex subunit 7 OS=Mus musculus OX=10090 GN=Uqcrb PE=1 SV=1;sp|Q9D855|QCR7_MOUSE Cytochrome b-c1 complex subunit 7 OS=Mus musculus OX=10090 GN=Uqcrb PE=1 SV=3	-0.111624	0.0611378	0.0460372	0.387964	0.157661	0.290061	0.000693092	0.447722	4.75646e-05
Cytochrome b-c1 complex subunit 10	Uqcr11	NO	sp|Q9CPX8|QCR10_MOUSE Cytochrome b-c1 complex subunit 10 OS=Mus musculus OX=10090 GN=Uqcr11 PE=3 SV=1	-0.211635	0.0301025	0.125624	0.150878	0.337258	-0.00194413	0.980765	0.335314	0.00362773
Cytochrome b-c1 complex subunit 9	Uqcr10	NO	sp|Q8R1I1|QCR9_MOUSE Cytochrome b-c1 complex subunit 9 OS=Mus musculus OX=10090 GN=Uqcr10 PE=1 SV=1	0.125015	0.0243268	0.0281686	0.538687	-0.0968464	0.173339	0.00547002	0.0764929	0.12304
Ubiquinol-cytochrome-c reductase complex assembly factor 3	Uqcc3	NO	sp|Q8K2T4|UQCC3_MOUSE Ubiquinol-cytochrome-c reductase complex assembly factor 3 OS=Mus musculus OX=10090 GN=Uqcc3 PE=1 SV=1	-0.297408	0.000630604	-0.225197	0.00301027	0.0722109	0.131392	0.0355327	0.203603	0.00508302
Ubiquinol-cytochrome-c reductase complex assembly factor 2	Uqcc2	NO	tr|D3Z4C9|D3Z4C9_MOUSE Ubiquinol-cytochrome-c reductase complex assembly factor 2 OS=Mus musculus OX=10090 GN=Uqcc2 PE=1 SV=1;sp|Q9CQY6|UQCC2_MOUSE Ubiquinol-cytochrome-c reductase complex assembly factor 2 OS=Mus musculus OX=10090 GN=Uqcc2 PE=1 SV=1;tr|D3	-0.160963	0.0109931	-0.111669	0.0486498	0.0492941	0.211574	0.00279869	0.260868	0.000869646
Ubiquinol-cytochrome-c reductase complex assembly factor 1	Uqcc1	YES	sp|Q9CWU6|UQCC1_MOUSE Ubiquinol-cytochrome-c reductase complex assembly factor 1 OS=Mus musculus OX=10090 GN=Uqcc1 PE=1 SV=1;tr|A6PWX7|A6PWX7_MOUSE Ubiquinol-cytochrome-c reductase complex assembly factor 1 OS=Mus musculus OX=10090 GN=Uqcc1 PE=1 SV=1;tr|F6	-0.06497	0.377912	-0.18265	0.0334116	-0.11768	0.285122	0.00450693	0.167442	0.0460081
Uracil phosphoribosyltransferase homolog	Uprt	NO	sp|B1AVZ0|UPP_MOUSE Uracil phosphoribosyltransferase homolog OS=Mus musculus OX=10090 GN=Uprt PE=1 SV=1	-0.107229	0.059716	-0.0859628	0.114853	0.0212665	-0.0644701	0.218775	-0.0432036	0.395219
Uridine phosphorylase 1	Upp1	NO	sp|P52624|UPP1_MOUSE Uridine phosphorylase 1 OS=Mus musculus OX=10090 GN=Upp1 PE=1 SV=2;tr|E9Q391|E9Q391_MOUSE Uridine phosphorylase 1 (Fragment) OS=Mus musculus OX=10090 GN=Upp1 PE=1 SV=1;tr|Q5SUC6|Q5SUC6_MOUSE Uridine phosphorylase 1 (Fragment) OS=Mus mu	-0.133578	0.599757	0.67535	0.0276715	0.808927	-0.593416	0.0450399	0.215511	0.404863
	Upf3b	YES	tr|Q3ULL6|Q3ULL6_MOUSE UPF3 regulator of nonsense transcripts homolog B (yeast) OS=Mus musculus OX=10090 GN=Upf3b PE=1 SV=1;tr|F6Q8N5|F6Q8N5_MOUSE UPF3 regulator of nonsense transcripts homolog B (yeast) (Fragment) OS=Mus musculus OX=10090 GN=Upf3b PE=1 SV	-0.0689005	0.0706287	-0.0912632	0.0258168	-0.0223627	-0.275901	6.41177e-05	-0.298264	3.88937e-05
	Upf2	NO	tr|A2AT37|A2AT37_MOUSE UPF2 regulator of nonsense transcripts homolog (Yeast) OS=Mus musculus OX=10090 GN=Upf2 PE=1 SV=1	-0.0982119	0.0167962	-0.0685562	0.0653937	0.0296557	-0.224585	0.000194381	-0.194929	0.000459912
Regulator of nonsense transcripts 1	Upf1	NO	sp|Q9EPU0|RENT1_MOUSE Regulator of nonsense transcripts 1 OS=Mus musculus OX=10090 GN=Upf1 PE=1 SV=2	0.0540561	0.154409	0.029296	0.415236	-0.0247601	-0.0362739	0.319303	-0.0610341	0.114533
RING finger protein unkempt homolog	Unk	NO	sp|Q8BL48|UNK_MOUSE RING finger protein unkempt homolog OS=Mus musculus OX=10090 GN=Unk PE=1 SV=1	-0.172953	0.000566184	-0.108748	0.00708953	0.0642052	-0.0567684	0.0898115	0.00743677	0.803702
Protein unc-45 homolog A	Unc45a	NO	sp|Q99KD5|UN45A_MOUSE Protein unc-45 homolog A OS=Mus musculus OX=10090 GN=Unc45a PE=1 SV=2;tr|D6RIN1|D6RIN1_MOUSE Protein unc-45 homolog A OS=Mus musculus OX=10090 GN=Unc45a PE=1 SV=1	-0.109833	0.00277383	-0.131707	0.00101119	-0.0218745	0.0978966	0.00505528	0.0760221	0.0166825
Protein unc-13 homolog D	Unc13d	NO	sp|B2RUP2|UN13D_MOUSE Protein unc-13 homolog D OS=Mus musculus OX=10090 GN=Unc13d PE=1 SV=2;tr|A0A0R4J257|A0A0R4J257_MOUSE Protein unc-13 homolog D OS=Mus musculus OX=10090 GN=Unc13d PE=1 SV=1	-0.0639023	0.063845	-0.0715253	0.0434589	-0.00762299	0.109379	0.00712918	0.101756	0.0100739
Protein unc-119 homolog A	Unc119	NO	sp|Q9Z2R6|U119A_MOUSE Protein unc-119 homolog A OS=Mus musculus OX=10090 GN=Unc119 PE=1 SV=1;tr|B1AQD9|B1AQD9_MOUSE Protein unc-119 homolog A OS=Mus musculus OX=10090 GN=Unc119 PE=1 SV=1;tr|B1AQD7|B1AQD7_MOUSE Protein unc-119 homolog A OS=Mus musculus OX=1	0.100215	0.16285	0.0950765	0.182506	-0.00513863	0.145517	0.058144	0.140378	0.0653932
Uridine 5-monophosphate synthase;Orotate phosphoribosyltransferase;Orotidine 5-phosphate decarboxylase	Umps	NO	sp|P13439|UMPS_MOUSE Uridine 5-monophosphate synthase OS=Mus musculus OX=10090 GN=Umps PE=1 SV=3	0.0708177	0.0393371	0.0363146	0.235208	-0.0345031	-0.00318786	0.912371	-0.0376909	0.219714
	Umad1	YES	tr|E0CZ61|E0CZ61_MOUSE UMAP1-MVP12-associated (UMA) domain-containing 1 (Fragment) OS=Mus musculus OX=10090 GN=Umad1 PE=1 SV=1;tr|E0CZ38|E0CZ38_MOUSE Uncharacterized protein OS=Mus musculus OX=10090 GN=Gm45062 PE=1 SV=1;tr|E0CXP6|E0CXP6_MOUSE MCG2776, isof	-0.262413	0.00803328	0.0496576	0.508812	0.312071	-0.482419	0.000276546	-0.170348	0.0486581
Serine/threonine-protein kinase ULK3	Ulk3	NO	sp|Q3U3Q1|ULK3_MOUSE Serine/threonine-protein kinase ULK3 OS=Mus musculus OX=10090 GN=Ulk3 PE=2 SV=1	0.0189601	0.639011	0.0439804	0.293179	0.0250203	-0.0399986	0.335685	-0.0149783	0.710084
Serine/threonine-protein kinase ULK1	Ulk1	NO	tr|A0A0R4J0B3|A0A0R4J0B3_MOUSE Serine/threonine-protein kinase ULK1 OS=Mus musculus OX=10090 GN=Ulk1 PE=1 SV=1;tr|Q6PB82|Q6PB82_MOUSE Serine/threonine-protein kinase ULK1 OS=Mus musculus OX=10090 GN=Ulk1 PE=1 SV=1;sp|O70405|ULK1_MOUSE Serine/threonine-prot	-0.112515	0.0920134	0.015669	0.793363	0.128184	0.00310599	0.958484	0.13129	0.0570027
UHRF1-binding protein 1-like	Uhrf1bp1l	YES	sp|A2RSJ4|UH1BL_MOUSE UHRF1-binding protein 1-like OS=Mus musculus OX=10090 GN=Uhrf1bp1l PE=1 SV=2	-0.0803812	0.0185117	-0.0431752	0.144338	0.037206	-0.13638	0.00130685	-0.0991736	0.007056
	Uhrf1bp1	NO	tr|B2KF50|B2KF50_MOUSE UHRF1 (ICBP90)-binding protein 1 OS=Mus musculus OX=10090 GN=Uhrf1bp1 PE=1 SV=1	-0.0690101	0.375615	-0.0584501	0.449245	0.01056	-0.560007	0.000126022	-0.549447	0.000141953
UTP--glucose-1-phosphate uridylyltransferase	Ugp2	YES	sp|Q91ZJ5|UGPA_MOUSE UTP--glucose-1-phosphate uridylyltransferase OS=Mus musculus OX=10090 GN=Ugp2 PE=1 SV=3	-0.0212689	0.596596	0.0261339	0.517699	0.0474028	0.0365493	0.372639	0.0839521	0.065237
UDP-glucose:glycoprotein glucosyltransferase 1	Uggt1	YES	sp|Q6P5E4|UGGG1_MOUSE UDP-glucose:glycoprotein glucosyltransferase 1 OS=Mus musculus OX=10090 GN=Uggt1 PE=1 SV=4	0.00845699	0.716738	-0.00295862	0.898548	-0.0114156	0.0854407	0.00671185	0.0740251	0.0132055
Ceramide glucosyltransferase	Ugcg	YES	sp|O88693|CEGT_MOUSE Ceramide glucosyltransferase OS=Mus musculus OX=10090 GN=Ugcg PE=1 SV=1	0.147297	0.0262809	0.15201	0.023124	0.00471357	0.202638	0.00625848	0.207351	0.00558002
Ufm1-specific protease 2	Ufsp2	YES	sp|Q99K23|UFSP2_MOUSE Ufm1-specific protease 2 OS=Mus musculus OX=10090 GN=Ufsp2 PE=1 SV=1	-0.0133102	0.783558	-0.101216	0.066951	-0.0879057	0.278948	0.000578428	0.191042	0.00470852
Ubiquitin-fold modifier 1	Ufm1	NO	tr|H7BWZ1|H7BWZ1_MOUSE Ubiquitin-fold modifier 1 OS=Mus musculus OX=10090 GN=Ufm1 PE=1 SV=1;tr|D3YW97|D3YW97_MOUSE Ubiquitin-fold modifier 1 OS=Mus musculus OX=10090 GN=Ufm1 PE=1 SV=1;sp|P61961|UFM1_MOUSE Ubiquitin-fold modifier 1 OS=Mus musculus OX=10090	-0.040561	0.289152	-0.00251686	0.945228	0.0380441	-0.0202256	0.585148	0.0178185	0.629713
E3 UFM1-protein ligase 1	Ufl1	YES	sp|Q8CCJ3|UFL1_MOUSE E3 UFM1-protein ligase 1 OS=Mus musculus OX=10090 GN=Ufl1 PE=1 SV=2	0.0790623	0.028488	0.092605	0.0146728	0.0135426	-0.0576512	0.0846349	-0.0441086	0.168137
Ubiquitin fusion degradation protein 1 homolog	Ufd1l	YES	sp|P70362|UFD1_MOUSE Ubiquitin recognition factor in ER-associated degradation protein 1 OS=Mus musculus OX=10090 GN=Ufd1 PE=1 SV=2	-0.137413	0.00250914	-0.0700295	0.0511983	0.0673833	-0.291852	2.64055e-05	-0.224469	0.000140931
Ubiquitin-fold modifier-conjugating enzyme 1	Ufc1	NO	sp|Q9CR09|UFC1_MOUSE Ubiquitin-fold modifier-conjugating enzyme 1 OS=Mus musculus OX=10090 GN=Ufc1 PE=1 SV=1;tr|M0QWS4|M0QWS4_MOUSE Ubiquitin-fold modifier conjugating enzyme 1, isoform CRA_c OS=Mus musculus OX=10090 GN=Ufc1 PE=1 SV=1	0.0563534	0.181441	-0.0177672	0.653858	-0.0741206	0.049711	0.23182	-0.0244095	0.540583
Ubiquitin-conjugating enzyme E2 variant 3	Uevld	NO	sp|Q3U1V6|UEVLD_MOUSE Ubiquitin-conjugating enzyme E2 variant 3 OS=Mus musculus OX=10090 GN=Uevld PE=1 SV=1	0.0572608	0.182385	0.0818607	0.0723416	0.0245999	-0.0184862	0.64704	0.00611375	0.878777
Uridine-cytidine kinase-like 1	Uckl1	YES	sp|Q91YL3|UCKL1_MOUSE Uridine-cytidine kinase-like 1 OS=Mus musculus OX=10090 GN=Uckl1 PE=1 SV=1	-0.0901415	0.129552	0.0287287	0.600681	0.11887	-0.130465	0.0420074	-0.0115949	0.831231
Uridine-cytidine kinase;Uridine-cytidine kinase 1	Uck1	NO	tr|A2AN37|A2AN37_MOUSE Uridine-cytidine kinase OS=Mus musculus OX=10090 GN=Uck1 PE=1 SV=1;sp|P52623|UCK1_MOUSE Uridine-cytidine kinase 1 OS=Mus musculus OX=10090 GN=Uck1 PE=1 SV=2;tr|F7CBX2|F7CBX2_MOUSE Uridine-cytidine kinase 1 (Fragment) OS=Mus musculus	0.0909179	0.119383	-0.043467	0.424028	-0.134385	0.0714991	0.205519	-0.0628859	0.259248
Ubiquitin carboxyl-terminal hydrolase isozyme L5	Uchl5	NO	sp|Q9WUP7|UCHL5_MOUSE Ubiquitin carboxyl-terminal hydrolase isozyme L5 OS=Mus musculus OX=10090 GN=Uchl5 PE=1 SV=2;tr|A0A087WP81|A0A087WP81_MOUSE Ubiquitin carboxyl-terminal hydrolase isozyme L5 (Fragment) OS=Mus musculus OX=10090 GN=Uchl5 PE=1 SV=1;tr|A0A	-0.0638263	0.228468	-0.0156735	0.755182	0.0481527	0.0719163	0.180701	0.120069	0.0422997
Ubiquitin carboxyl-terminal hydrolase isozyme L3;Ubiquitin carboxyl-terminal hydrolase isozyme L4	Uchl3;Uchl4	YES	sp|Q9JKB1|UCHL3_MOUSE Ubiquitin carboxyl-terminal hydrolase isozyme L3 OS=Mus musculus OX=10090 GN=Uchl3 PE=1 SV=2;tr|A0A2I3BQ39|A0A2I3BQ39_MOUSE Ubiquitin carboxyl-terminal hydrolase (Fragment) OS=Mus musculus OX=10090 GN=Uchl3 PE=1 SV=1;sp|P58321|UCHL4_M	0.100512	0.111443	-0.0272877	0.635783	-0.127799	0.0755025	0.213452	-0.0522968	0.374555
UBX domain-containing protein 8	Ubxn8	NO	tr|Q3TTF2|Q3TTF2_MOUSE UBX domain-containing protein 8 OS=Mus musculus OX=10090 GN=Ubxn8 PE=1 SV=1;sp|Q9QZ49|UBXN8_MOUSE UBX domain-containing protein 8 OS=Mus musculus OX=10090 GN=Ubxn8 PE=1 SV=1	-0.201152	0.472553	-0.515365	0.0932053	-0.314213	0.101862	0.712021	-0.212351	0.449256
UBX domain-containing protein 7	Ubxn7	YES	tr|G5E8R8|G5E8R8_MOUSE UBX domain-containing protein 7 OS=Mus musculus OX=10090 GN=Ubxn7 PE=1 SV=1;sp|Q6P5G6|UBXN7_MOUSE UBX domain-containing protein 7 OS=Mus musculus OX=10090 GN=Ubxn7 PE=1 SV=2	-0.121739	0.227622	-0.0138148	0.884862	0.107924	-0.379139	0.00456864	-0.271214	0.0217423
UBX domain-containing protein 6	Ubxn6	NO	sp|Q99PL6|UBXN6_MOUSE UBX domain-containing protein 6 OS=Mus musculus OX=10090 GN=Ubxn6 PE=1 SV=1	-0.151552	0.0202241	-0.0594999	0.277683	0.0920524	-0.26584	0.00121776	-0.173788	0.0110403
UBX domain-containing protein 4	Ubxn4	YES	tr|A0A0R4J078|A0A0R4J078_MOUSE UBX domain containing 2, isoform CRA_a OS=Mus musculus OX=10090 GN=Ubxn4 PE=1 SV=1;sp|Q8VCH8|UBXN4_MOUSE UBX domain-containing protein 4 OS=Mus musculus OX=10090 GN=Ubxn4 PE=1 SV=1	-0.122674	0.0208766	0.0818199	0.0878736	0.204494	-0.111331	0.0308868	0.0931639	0.0586498
UBX domain-containing protein 2A	Ubxn2a	NO	sp|Q99KJ0|UBX2A_MOUSE UBX domain-containing protein 2A OS=Mus musculus OX=10090 GN=Ubxn2a PE=1 SV=1	-0.248283	0.253136	-0.00384811	0.985131	0.244435	-0.242229	0.263809	0.00220539	0.991478
UBX domain-containing protein 1	Ubxn1	NO	sp|Q922Y1|UBXN1_MOUSE UBX domain-containing protein 1 OS=Mus musculus OX=10090 GN=Ubxn1 PE=1 SV=1	-0.0509895	0.660806	-0.112798	0.344844	-0.0618086	-0.330353	0.0211513	-0.392162	0.00987523
Ubiquitin domain-containing protein 1;Ubiquitin domain-containing protein 2	Ubtd1;Ubtd2	YES	sp|Q91WB7|UBTD1_MOUSE Ubiquitin domain-containing protein 1 OS=Mus musculus OX=10090 GN=Ubtd1 PE=2 SV=1;sp|Q6PGH0|UBTD2_MOUSE Ubiquitin domain-containing protein 2 OS=Mus musculus OX=10090 GN=Ubtd2 PE=2 SV=1	-0.130509	0.0295541	-0.104705	0.0648704	0.0258041	0.03348	0.506033	0.0592841	0.254793
E3 ubiquitin-protein ligase UBR4	Ubr4	NO	sp|A2AN08|UBR4_MOUSE E3 ubiquitin-protein ligase UBR4 OS=Mus musculus OX=10090 GN=Ubr4 PE=1 SV=1	-0.0429405	0.148879	-0.0334282	0.24701	0.00951234	0.0037997	0.889807	0.013312	0.630205
E3 ubiquitin-protein ligase UBR3	Ubr3	YES	tr|F6QC57|F6QC57_MOUSE E3 ubiquitin-protein ligase UBR3 OS=Mus musculus OX=10090 GN=Ubr3 PE=1 SV=1;sp|Q5U430|UBR3_MOUSE E3 ubiquitin-protein ligase UBR3 OS=Mus musculus OX=10090 GN=Ubr3 PE=1 SV=3	-0.0365455	0.596114	-0.0602552	0.390622	-0.0237097	-0.0947076	0.193761	-0.118417	0.115487
E3 ubiquitin-protein ligase UBR2	Ubr2	YES	sp|Q6WKZ8|UBR2_MOUSE E3 ubiquitin-protein ligase UBR2 OS=Mus musculus OX=10090 GN=Ubr2 PE=1 SV=2	-0.0295885	0.339258	-0.019564	0.519401	0.0100244	0.0416268	0.192485	0.0516512	0.116823
E3 ubiquitin-protein ligase UBR1	Ubr1	YES	sp|O70481|UBR1_MOUSE E3 ubiquitin-protein ligase UBR1 OS=Mus musculus OX=10090 GN=Ubr1 PE=1 SV=2	-0.118056	0.0562133	-0.110148	0.0704086	0.0079078	0.128764	0.0415017	0.136672	0.0332329
Ubiquilin-4	Ubqln4	NO	sp|Q99NB8|UBQL4_MOUSE Ubiquilin-4 OS=Mus musculus OX=10090 GN=Ubqln4 PE=1 SV=1	-0.0276404	0.637956	-0.0357548	0.544981	-0.00811442	-0.0637341	0.29441	-0.0718485	0.242199
Ubiquilin-2	Ubqln2	YES	sp|Q9QZM0|UBQL2_MOUSE Ubiquilin-2 OS=Mus musculus OX=10090 GN=Ubqln2 PE=1 SV=2	-0.0412662	0.355361	-0.109306	0.034637	-0.0680396	-0.0239927	0.582967	-0.0920323	0.063398
Ubiquilin-1	Ubqln1	NO	sp|Q8R317|UBQL1_MOUSE Ubiquilin-1 OS=Mus musculus OX=10090 GN=Ubqln1 PE=1 SV=1	-0.128152	0.0261038	-0.0503375	0.304957	0.077814	-0.146302	0.0149159	-0.0684882	0.175981
Upstream-binding protein 1	Ubp1	NO	sp|Q811S7|UBIP1_MOUSE Upstream-binding protein 1 OS=Mus musculus OX=10090 GN=Ubp1 PE=1 SV=1	0.0830328	0.109159	0.0701666	0.164804	-0.0128663	-0.0370539	0.439373	-0.0499202	0.306043
Ubiquitin-like domain-containing CTD phosphatase 1	Ublcp1	YES	sp|Q8BGR9|UBCP1_MOUSE Ubiquitin-like domain-containing CTD phosphatase 1 OS=Mus musculus OX=10090 GN=Ublcp1 PE=1 SV=1	0.189697	0.00304462	0.0266085	0.551956	-0.163088	0.209596	0.00177119	0.0465082	0.311168
Ubiquitin-like protein 7	Ubl7	NO	sp|Q91W67|UBL7_MOUSE Ubiquitin-like protein 7 OS=Mus musculus OX=10090 GN=Ubl7 PE=1 SV=2;tr|A0A1L1SRT5|A0A1L1SRT5_MOUSE Ubiquitin-like protein 7 (Fragment) OS=Mus musculus OX=10090 GN=Ubl7 PE=1 SV=1;tr|A0A1L1SRW2|A0A1L1SRW2_MOUSE Ubiquitin-like protein 7 (	-0.0327238	0.594423	-0.0495522	0.426386	-0.0168284	-0.0926194	0.158803	-0.109448	0.104778
Ubiquitin-like protein 5	Ubl5	NO	tr|E0CY91|E0CY91_MOUSE Ubiquitin-like protein 5 OS=Mus musculus OX=10090 GN=Ubl5 PE=4 SV=1;tr|E0CYW1|E0CYW1_MOUSE Ubiquitin-like protein 5 (Fragment) OS=Mus musculus OX=10090 GN=Ubl5 PE=1 SV=1;tr|E0CY38|E0CY38_MOUSE Ubiquitin-like 5, isoform CRA_a OS=Mus m	-0.0930575	0.15462	-0.0557947	0.370297	0.0372628	0.0954192	0.145862	0.132682	0.057243
Ubiquitin-like protein 4A	Ubl4a	NO	sp|P21126|UBL4A_MOUSE Ubiquitin-like protein 4A OS=Mus musculus OX=10090 GN=Ubl4a PE=1 SV=1	-0.122152	0.0428189	-0.169485	0.0111034	-0.0473325	-0.142944	0.023358	-0.190276	0.00638046
Ubiquitin-like protein 3	Ubl3	NO	sp|Q9Z2M6|UBL3_MOUSE Ubiquitin-like protein 3 OS=Mus musculus OX=10090 GN=Ubl3 PE=1 SV=1	0.514783	0.171338	-0.0186413	0.957488	-0.533424	0.0246111	0.943898	-0.508813	0.175706
UbiA prenyltransferase domain-containing protein 1	Ubiad1	YES	sp|Q9DC60|UBIA1_MOUSE UbiA prenyltransferase domain-containing protein 1 OS=Mus musculus OX=10090 GN=Ubiad1 PE=2 SV=1	-0.236104	0.0138043	-0.0677987	0.378473	0.168305	-0.128769	0.117644	0.0395363	0.600492
Ubiquitin domain-containing protein UBFD1	Ubfd1	YES	sp|Q78JW9|UBFD1_MOUSE Ubiquitin domain-containing protein UBFD1 OS=Mus musculus OX=10090 GN=Ubfd1 PE=1 SV=2	-0.0717052	0.232982	-0.036447	0.52797	0.0352582	-0.253636	0.00250016	-0.218378	0.00546196
Ubiquitin conjugation factor E4 B	Ube4b	YES	sp|Q9ES00|UBE4B_MOUSE Ubiquitin conjugation factor E4 B OS=Mus musculus OX=10090 GN=Ube4b PE=1 SV=3;tr|G3UZD6|G3UZD6_MOUSE Ubiquitin conjugation factor E4 B OS=Mus musculus OX=10090 GN=Ube4b PE=1 SV=1	-0.0265577	0.414568	0.0125217	0.694769	0.0390794	0.0577154	0.1018	0.0967948	0.0161335
Ubiquitin conjugation factor E4 A	Ube4a	NO	tr|G3X9Y5|G3X9Y5_MOUSE Ubiquitin conjugation factor E4 A OS=Mus musculus OX=10090 GN=Ube4a PE=1 SV=1;sp|E9Q735|UBE4A_MOUSE Ubiquitin conjugation factor E4 A OS=Mus musculus OX=10090 GN=Ube4a PE=1 SV=1	-0.130415	0.00156473	-0.104239	0.00516948	0.0261754	0.0378196	0.188169	0.063995	0.0432253
Ubiquitin-protein ligase E3C	Ube3c	NO	sp|Q80U95|UBE3C_MOUSE Ubiquitin-protein ligase E3C OS=Mus musculus OX=10090 GN=Ube3c PE=1 SV=2	-0.0878452	0.0772146	-0.0109967	0.802653	0.0768484	0.094799	0.0606712	0.171647	0.00498295
Ubiquitin-protein ligase E3B	Ube3b	NO	sp|Q9ES34|UBE3B_MOUSE Ubiquitin-protein ligase E3B OS=Mus musculus OX=10090 GN=Ube3b PE=1 SV=3	-0.0632275	0.413805	-0.126408	0.126311	-0.0631801	0.045165	0.5545	-0.018015	0.811555
Ubiquitin-protein ligase E3A	Ube3a	YES	sp|O08759|UBE3A_MOUSE Ubiquitin-protein ligase E3A OS=Mus musculus OX=10090 GN=Ube3a PE=1 SV=2	-0.0753069	0.0302755	-0.051132	0.108144	0.0241749	-0.0348772	0.249125	-0.0107023	0.711016
Ubiquitin-conjugating enzyme E2 Z	Ube2z	YES	sp|Q3UE37|UBE2Z_MOUSE Ubiquitin-conjugating enzyme E2 Z OS=Mus musculus OX=10090 GN=Ube2z PE=1 SV=2	-0.000283993	0.991608	-0.00279372	0.917629	-0.00250972	0.0300559	0.286867	0.0275462	0.325806
Ubiquitin-conjugating enzyme E2 variant 2	Ube2v2	YES	sp|Q9D2M8|UB2V2_MOUSE Ubiquitin-conjugating enzyme E2 variant 2 OS=Mus musculus OX=10090 GN=Ube2v2 PE=1 SV=4;tr|A6X925|A6X925_MOUSE Ubiquitin-conjugating enzyme E2 variant 2 OS=Mus musculus OX=10090 GN=Ube2v2 PE=1 SV=1;tr|B2KF55|B2KF55_MOUSE Ubiquitin-conj	0.0571627	0.260611	0.0431161	0.386543	-0.0140466	0.0191128	0.694452	0.00506629	0.916612
Ubiquitin-conjugating enzyme E2 variant 1	Ube2v1;Gm20431	NO	sp|Q9CZY3|UB2V1_MOUSE Ubiquitin-conjugating enzyme E2 variant 1 OS=Mus musculus OX=10090 GN=Ube2v1 PE=1 SV=1;tr|B7ZBY7|B7ZBY7_MOUSE Ubiquitin-conjugating enzyme E2 variant 1 OS=Mus musculus OX=10090 GN=Ube2v1 PE=4 SV=1;tr|E9PY39|E9PY39_MOUSE TMEM189-UBE2V1	-0.0656045	0.459006	-0.146104	0.124835	-0.0804995	0.0980223	0.280181	0.0175228	0.840149
Ubiquitin-conjugating enzyme E2 R2	Ube2r2	NO	sp|Q6ZWZ2|UB2R2_MOUSE Ubiquitin-conjugating enzyme E2 R2 OS=Mus musculus OX=10090 GN=Ube2r2 PE=1 SV=1	0.0148215	0.861446	0.147718	0.114531	0.132896	-0.432423	0.00119058	-0.299527	0.00824804
Ubiquitin-conjugating enzyme E2 Q2	Ube2q2	YES	sp|Q8K2Z8|UB2Q2_MOUSE Ubiquitin-conjugating enzyme E2 Q2 OS=Mus musculus OX=10090 GN=Ube2q2 PE=2 SV=2;tr|D3Z647|D3Z647_MOUSE Ubiquitin-conjugating enzyme E2 Q2 OS=Mus musculus OX=10090 GN=Ube2q2 PE=1 SV=1	-0.00310493	0.953391	0.0119809	0.821881	0.0150858	-0.0387205	0.474766	-0.0236346	0.658747
Ubiquitin-conjugating enzyme E2 Q1	Ube2q1	NO	sp|Q7TSS2|UB2Q1_MOUSE Ubiquitin-conjugating enzyme E2 Q1 OS=Mus musculus OX=10090 GN=Ube2q1 PE=1 SV=2	0.121793	0.0415697	-0.0741996	0.172472	-0.195992	0.108456	0.0619994	-0.087536	0.116271
E2/E3 hybrid ubiquitin-protein ligase UBE2O	Ube2o	NO	sp|Q6ZPJ3|UBE2O_MOUSE (E3-independent) E2 ubiquitin-conjugating enzyme UBE2O OS=Mus musculus OX=10090 GN=Ube2o PE=1 SV=3	-0.0259105	0.460078	-0.00782126	0.820199	0.0180892	-0.129903	0.00589019	-0.111814	0.0120696
Ubiquitin-conjugating enzyme E2 N	Ube2n	YES	sp|P61089|UBE2N_MOUSE Ubiquitin-conjugating enzyme E2 N OS=Mus musculus OX=10090 GN=Ube2n PE=1 SV=1	0.048212	0.0827792	0.0336835	0.20014	-0.0145285	0.0168207	0.502534	0.00229223	0.92595
NEDD8-conjugating enzyme Ubc12	Ube2m	NO	sp|P61082|UBC12_MOUSE NEDD8-conjugating enzyme Ubc12 OS=Mus musculus OX=10090 GN=Ube2m PE=1 SV=1;tr|F7CDT0|F7CDT0_MOUSE NEDD8-conjugating enzyme Ubc12 (Fragment) OS=Mus musculus OX=10090 GN=Ube2m PE=1 SV=1;tr|F6WMC0|F6WMC0_MOUSE NEDD8-conjugating enzyme Ub	-0.087711	0.0376587	-0.101366	0.0212733	-0.013655	0.0673598	0.0899837	0.0537048	0.160748
Ubiquitin/ISG15-conjugating enzyme E2 L6	Ube2l6	NO	sp|Q9QZU9|UB2L6_MOUSE Ubiquitin/ISG15-conjugating enzyme E2 L6 OS=Mus musculus OX=10090 GN=Ube2l6 PE=1 SV=3	0.139736	0.0179391	0.123227	0.0300519	-0.0165083	-0.145671	0.0149612	-0.16218	0.00914447
Ubiquitin-conjugating enzyme E2 L3	Ube2l3	NO	sp|P68037|UB2L3_MOUSE Ubiquitin-conjugating enzyme E2 L3 OS=Mus musculus OX=10090 GN=Ube2l3 PE=1 SV=1	0.0345828	0.622121	-0.0307831	0.660272	-0.0653658	0.125725	0.103478	0.0603596	0.398323
Ubiquitin-conjugating enzyme E2 K	Ube2k	YES	sp|P61087|UBE2K_MOUSE Ubiquitin-conjugating enzyme E2 K OS=Mus musculus OX=10090 GN=Ube2k PE=1 SV=3;tr|A0A0J9YUI1|A0A0J9YUI1_MOUSE Ubiquitin-conjugating enzyme E2 K OS=Mus musculus OX=10090 GN=Ube2k PE=1 SV=1;tr|A0A0J9YU07|A0A0J9YU07_MOUSE Ubiquitin-conjug	-0.0850912	0.113505	-0.0641675	0.21469	0.0209237	0.0554031	0.277192	0.0763267	0.148747
Ubiquitin-conjugating enzyme E2 J1	Ube2j1	YES	sp|Q9JJZ4|UB2J1_MOUSE Ubiquitin-conjugating enzyme E2 J1 OS=Mus musculus OX=10090 GN=Ube2j1 PE=1 SV=2;tr|F6SPK0|F6SPK0_MOUSE Ubiquitin-conjugating enzyme E2 J1 (Fragment) OS=Mus musculus OX=10090 GN=Ube2j1 PE=1 SV=1	0.105054	0.0230656	0.0784323	0.0670322	-0.0266215	-0.0462878	0.241441	-0.0729092	0.0839029
SUMO-conjugating enzyme UBC9	Ube2i	NO	sp|P63280|UBC9_MOUSE SUMO-conjugating enzyme UBC9 OS=Mus musculus OX=10090 GN=Ube2i PE=1 SV=1;tr|G3UYP0|G3UYP0_MOUSE SUMO-conjugating enzyme UBC9 (Fragment) OS=Mus musculus OX=10090 GN=Ube2i PE=1 SV=1;tr|Q8CFZ0|Q8CFZ0_MOUSE SUMO-conjugating enzyme UBC9 OS=	0.276542	0.000544996	0.275784	0.000553942	-0.000758537	0.0628755	0.212179	0.062117	0.217135
Ubiquitin-conjugating enzyme E2 H	Ube2h	YES	tr|E9Q3U1|E9Q3U1_MOUSE Ubiquitin-conjugating enzyme E2 H OS=Mus musculus OX=10090 GN=Ube2h PE=1 SV=1;sp|P62257|UBE2H_MOUSE Ubiquitin-conjugating enzyme E2 H OS=Mus musculus OX=10090 GN=Ube2h PE=1 SV=1	-0.0410163	0.659234	0.0304412	0.742631	0.0714576	-0.0777338	0.412017	-0.0062762	0.945809
Ubiquitin-conjugating enzyme E2 G2	Ube2g2	YES	sp|P60605|UB2G2_MOUSE Ubiquitin-conjugating enzyme E2 G2 OS=Mus musculus OX=10090 GN=Ube2g2 PE=1 SV=1;tr|G3UZX2|G3UZX2_MOUSE Ubiquitin-conjugating enzyme E2 G2 (Fragment) OS=Mus musculus OX=10090 GN=Ube2g2 PE=1 SV=1	-0.114054	0.0195235	-0.0269091	0.498633	0.0871445	0.0752616	0.0865441	0.162406	0.00363623
Ubiquitin-conjugating enzyme E2 G1;Ubiquitin-conjugating enzyme E2 G1, N-terminally processed	Ube2g1	NO	sp|P62254|UB2G1_MOUSE Ubiquitin-conjugating enzyme E2 G1 OS=Mus musculus OX=10090 GN=Ube2g1 PE=1 SV=3	-0.118018	0.0657931	-0.0878595	0.148616	0.0301585	-0.00933785	0.867779	0.0208207	0.711643
NEDD8-conjugating enzyme UBE2F	Ube2f	NO	sp|Q9CY34|UB2FA_MOUSE NEDD8-conjugating enzyme UBE2F OS=Mus musculus OX=10090 GN=Ube2f PE=1 SV=1	-0.0463376	0.405282	-0.0297311	0.587609	0.0166065	-0.010447	0.847386	0.00615945	0.909575
Ubiquitin-conjugating enzyme E2 E1;Ubiquitin-conjugating enzyme E2 E2;Ubiquitin-conjugating enzyme E2 E3	Ube2e2;Ube2e1;Ube2e3	YES	tr|H3BL23|H3BL23_MOUSE Ubiquitin-conjugating enzyme E2 E2 (Fragment) OS=Mus musculus OX=10090 GN=Ube2e2 PE=1 SV=1;tr|A0A286YE31|A0A286YE31_MOUSE Ubiquitin-conjugating enzyme E2 E1 (Fragment) OS=Mus musculus OX=10090 GN=Ube2e1 PE=1 SV=1;tr|H3BL69|H3BL69_MOU	-0.0553131	0.593125	-0.0287769	0.779319	0.0265362	-0.0783392	0.454033	-0.051803	0.616321
Ubiquitin-conjugating enzyme E2 D3;Ubiquitin-conjugating enzyme E2 D2	Ube2d3;Ube2d2	NO	tr|A0A0G2JE32|A0A0G2JE32_MOUSE Ubiquitin-conjugating enzyme E2 D3 (Fragment) OS=Mus musculus OX=10090 GN=Ube2d3 PE=1 SV=1;tr|A0A0G2JGL0|A0A0G2JGL0_MOUSE Ubiquitin-conjugating enzyme E2 D3 OS=Mus musculus OX=10090 GN=Ube2d3 PE=1 SV=1;sp|P61079|UB2D3_MOUSE U	0.0536113	0.255887	-0.074105	0.131157	-0.127716	0.0772644	0.117962	-0.0504519	0.282399
Ubiquitin-conjugating enzyme E2 D1	Ube2d1	NO	sp|P61080|UB2D1_MOUSE Ubiquitin-conjugating enzyme E2 D1 OS=Mus musculus OX=10090 GN=Ube2d1 PE=1 SV=1	0.0917119	0.183392	0.202683	0.0139843	0.110971	-0.0875989	0.20135	0.0233722	0.71766
Ubiquitin-conjugating enzyme E2 B	Ube2b	YES	sp|P63147|UBE2B_MOUSE Ubiquitin-conjugating enzyme E2 B OS=Mus musculus OX=10090 GN=Ube2b PE=1 SV=1	0.0563089	0.403238	-0.0411677	0.536145	-0.0974766	-0.00152277	0.981472	-0.0989994	0.162058
Ubiquitin-conjugating enzyme E2 A	Ube2a	NO	tr|A0A0J9YUW6|A0A0J9YUW6_MOUSE Ubiquitin-conjugating enzyme E2 A (Fragment) OS=Mus musculus OX=10090 GN=Ube2a PE=1 SV=1;tr|A0A0J9YUN2|A0A0J9YUN2_MOUSE Ubiquitin-conjugating enzyme E2 A OS=Mus musculus OX=10090 GN=Ube2a PE=1 SV=1;sp|Q9Z255|UBE2A_MOUSE Ubiqu	0.0171485	0.877148	-0.0757365	0.501865	-0.092885	-0.0517681	0.643186	-0.144653	0.218629
Ubiquitin-associated and SH3 domain-containing protein B	Ubash3b	YES	sp|Q8BGG7|UBS3B_MOUSE Ubiquitin-associated and SH3 domain-containing protein B OS=Mus musculus OX=10090 GN=Ubash3b PE=1 SV=1	-0.0660898	0.14466	-0.0985233	0.0444647	-0.0324335	-0.0400535	0.352583	-0.072487	0.114849
Ubiquitin-associated and SH3 domain-containing protein A	Ubash3a	NO	sp|Q3V3E1|UBS3A_MOUSE Ubiquitin-associated and SH3 domain-containing protein A OS=Mus musculus OX=10090 GN=Ubash3a PE=1 SV=1	-0.060572	0.0464832	-0.139417	0.000879062	-0.0788454	0.0706002	0.0260647	-0.00824517	0.751511
Ubiquitin-associated protein 2-like	Ubap2l	YES	sp|Q80X50|UBP2L_MOUSE Ubiquitin-associated protein 2-like OS=Mus musculus OX=10090 GN=Ubap2l PE=1 SV=1;tr|A0A0H2UH17|A0A0H2UH17_MOUSE Ubiquitin associated protein 2-like, isoform CRA_b OS=Mus musculus OX=10090 GN=Ubap2l PE=1 SV=1;tr|A0A0G2JDV6|A0A0G2JDV6_M	-0.188173	0.00346205	-0.106799	0.0433554	0.0813743	-1.10118	4.36861e-08	-1.0198	7.38485e-08
Ubiquitin-associated protein 1	Ubap1	NO	sp|Q8BH48|UBAP1_MOUSE Ubiquitin-associated protein 1 OS=Mus musculus OX=10090 GN=Ubap1 PE=1 SV=1	-0.127538	0.0200419	0.00335188	0.939239	0.13089	-0.435351	1.96849e-05	-0.304461	0.000192283
Ubiquitin-associated domain-containing protein 2	Ubac2	YES	sp|Q8R1K1|UBAC2_MOUSE Ubiquitin-associated domain-containing protein 2 OS=Mus musculus OX=10090 GN=Ubac2 PE=1 SV=1	0.0138722	0.813542	-0.194823	0.011041	-0.208695	0.345668	0.000513913	0.136973	0.0465785
Ubiquitin-associated domain-containing protein 1	Ubac1	NO	sp|Q8VDI7|UBAC1_MOUSE Ubiquitin-associated domain-containing protein 1 OS=Mus musculus OX=10090 GN=Ubac1 PE=1 SV=2;tr|F6Z1E7|F6Z1E7_MOUSE Ubiquitin-associated domain-containing protein 1 (Fragment) OS=Mus musculus OX=10090 GN=Ubac1 PE=1 SV=1;tr|F6UMH9|F6UM	0.256961	0.000314611	0.0128539	0.750151	-0.244107	-0.0639155	0.143914	-0.308023	0.000102415
	Uba7	NO	tr|Q9DBK7|Q9DBK7_MOUSE MCG18845, isoform CRA_d OS=Mus musculus OX=10090 GN=Uba7 PE=1 SV=1	-0.0575207	0.108228	-0.0242194	0.463181	0.0333013	-0.0303892	0.36275	0.00291211	0.928259
Ubiquitin-like modifier-activating enzyme 6	Uba6	YES	sp|Q8C7R4|UBA6_MOUSE Ubiquitin-like modifier-activating enzyme 6 OS=Mus musculus OX=10090 GN=Uba6 PE=1 SV=1;tr|D3Z061|D3Z061_MOUSE Ubiquitin-like modifier-activating enzyme 6 OS=Mus musculus OX=10090 GN=Uba6 PE=1 SV=1	0.0151098	0.552398	0.0119183	0.637605	-0.00319155	0.0337341	0.206482	0.0305426	0.247812
Ubiquitin-like modifier-activating enzyme 5	Uba5	NO	sp|Q8VE47|UBA5_MOUSE Ubiquitin-like modifier-activating enzyme 5 OS=Mus musculus OX=10090 GN=Uba5 PE=1 SV=2	0.0409078	0.544896	0.0444515	0.511671	0.00354366	-0.0180249	0.78731	-0.0144812	0.828226
NEDD8-activating enzyme E1 catalytic subunit	Uba3	YES	tr|Q3TL72|Q3TL72_MOUSE NEDD8-activating enzyme E1 catalytic subunit OS=Mus musculus OX=10090 GN=Uba3 PE=1 SV=1;sp|Q8C878|UBA3_MOUSE NEDD8-activating enzyme E1 catalytic subunit OS=Mus musculus OX=10090 GN=Uba3 PE=1 SV=2	0.0420082	0.158521	-0.0057572	0.83475	-0.0477654	0.127722	0.00202539	0.0799563	0.0200117
Ubiquitin-like modifier-activating enzyme 1	Uba1	NO	sp|Q02053|UBA1_MOUSE Ubiquitin-like modifier-activating enzyme 1 OS=Mus musculus OX=10090 GN=Uba1 PE=1 SV=1	-0.015882	0.529973	-0.0578821	0.0472748	-0.0420001	0.0539215	0.0601752	0.0119214	0.635127
UDP-N-acetylhexosamine pyrophosphorylase-like protein 1	Uap1l1	NO	sp|Q3TW96|UAP1L_MOUSE UDP-N-acetylhexosamine pyrophosphorylase-like protein 1 OS=Mus musculus OX=10090 GN=Uap1l1 PE=1 SV=1	-0.0248092	0.537291	0.0119387	0.764009	0.0367479	0.134047	0.0101154	0.170795	0.00300376
UDP-N-acetylhexosamine pyrophosphorylase;UDP-N-acetylgalactosamine pyrophosphorylase;UDP-N-acetylglucosamine pyrophosphorylase	Uap1	YES	tr|A0A0R4J1F6|A0A0R4J1F6_MOUSE UDP-N-acetylhexosamine pyrophosphorylase OS=Mus musculus OX=10090 GN=Uap1 PE=1 SV=1;tr|A0A0R4J085|A0A0R4J085_MOUSE UDP-N-acetylhexosamine pyrophosphorylase OS=Mus musculus OX=10090 GN=Uap1 PE=1 SV=1;tr|Q3UHZ7|Q3UHZ7_MOUSE UDP	0.303305	1.6016e-05	0.20366	0.000203458	-0.0996451	0.203177	0.000206458	0.103532	0.00874306
Uveal autoantigen with coiled-coil domains and ankyrin repeats	Uaca	NO	tr|A0A1L1SVG0|A0A1L1SVG0_MOUSE Uveal autoantigen with coiled-coil domains and ankyrin repeats OS=Mus musculus OX=10090 GN=Uaca PE=1 SV=1;tr|A0A0R4J0S7|A0A0R4J0S7_MOUSE Uveal autoantigen with coiled-coil domains and ankyrin repeats OS=Mus musculus OX=10090	0.010993	0.769926	0.00197951	0.957865	-0.00901349	-0.00554968	0.882333	-0.0145632	0.699122
tRNA wybutosine-synthesizing protein 5	Tyw5	YES	sp|A2RSX7|TYW5_MOUSE tRNA wybutosine-synthesizing protein 5 OS=Mus musculus OX=10090 GN=Tyw5 PE=2 SV=2	0.114999	0.186072	0.133427	0.132844	0.0184286	0.0351932	0.666978	0.0536218	0.515923
S-adenosyl-L-methionine-dependent tRNA 4-demethylwyosine synthase	Tyw1	NO	sp|Q8BJM7|TYW1_MOUSE S-adenosyl-L-methionine-dependent tRNA 4-demethylwyosine synthase OS=Mus musculus OX=10090 GN=Tyw1 PE=1 SV=1;tr|A0A0R4J0L2|A0A0R4J0L2_MOUSE S-adenosyl-L-methionine-dependent tRNA 4-demethylwyosine synthase OS=Mus musculus OX=10090 GN=T	-0.0504721	0.131595	-0.0209007	0.502078	0.0295714	0.0281939	0.371714	0.0577653	0.0917707
Thymidylate synthase	Tyms	NO	sp|P07607|TYSY_MOUSE Thymidylate synthase OS=Mus musculus OX=10090 GN=Tyms PE=1 SV=1;tr|A0A0G2JF31|A0A0G2JF31_MOUSE Thymidylate synthase (Fragment) OS=Mus musculus OX=10090 GN=Tyms PE=1 SV=1;tr|A0A0G2JF03|A0A0G2JF03_MOUSE Thymidylate synthase (Fragment) OS	0.127102	0.0403719	0.150045	0.0210618	0.0229436	-0.277317	0.000954458	-0.254373	0.00155835
Tyrosine-protein kinase;Non-receptor tyrosine-protein kinase TYK2	Tyk2	NO	tr|E9QJS1|E9QJS1_MOUSE Tyrosine-protein kinase OS=Mus musculus OX=10090 GN=Tyk2 PE=1 SV=1;sp|Q9R117|TYK2_MOUSE Non-receptor tyrosine-protein kinase TYK2 OS=Mus musculus OX=10090 GN=Tyk2 PE=1 SV=3	0.0532638	0.272566	0.00759562	0.869885	-0.0456682	0.105473	0.0507699	0.0598048	0.223114
Thioredoxin reductase 3	Txnrd3	NO	tr|G3X8P6|G3X8P6_MOUSE Thioredoxin reductase 3 OS=Mus musculus OX=10090 GN=Txnrd3 PE=1 SV=1;sp|Q99MD6|TRXR3_MOUSE Thioredoxin reductase 3 OS=Mus musculus OX=10090 GN=Txnrd3 PE=1 SV=3;tr|D3Z0H7|D3Z0H7_MOUSE Thioredoxin reductase 3 OS=Mus musculus OX=10090 G	0.253403	0.0373737	-0.107178	0.313336	-0.360581	0.26244	0.0327374	-0.0981403	0.35298
Thioredoxin reductase 2, mitochondrial	Txnrd2	NO	tr|A0A0U1RQA4|A0A0U1RQA4_MOUSE Thioredoxin reductase 2, mitochondrial OS=Mus musculus OX=10090 GN=Txnrd2 PE=1 SV=1;tr|J3QMN4|J3QMN4_MOUSE Thioredoxin reductase 2, mitochondrial OS=Mus musculus OX=10090 GN=Txnrd2 PE=1 SV=1;tr|A0A0U1RPV8|A0A0U1RPV8_MOUSE Thi	0.285488	0.00241467	-0.0769388	0.250566	-0.362427	1.1174	4.27792e-07	0.754971	5.96457e-06
Thioredoxin reductase 1, cytoplasmic	Txnrd1	YES	sp|Q9JMH6|TRXR1_MOUSE Thioredoxin reductase 1, cytoplasmic OS=Mus musculus OX=10090 GN=Txnrd1 PE=1 SV=3	0.218046	0.0243789	-0.0393592	0.620735	-0.257405	-0.0208903	0.791471	-0.278295	0.00824273
Thioredoxin-like protein 4A	Txnl4a	NO	sp|P83877|TXN4A_MOUSE Thioredoxin-like protein 4A OS=Mus musculus OX=10090 GN=Txnl4a PE=1 SV=1;tr|F8WGE7|F8WGE7_MOUSE Thioredoxin-like protein 4A (Fragment) OS=Mus musculus OX=10090 GN=Txnl4a PE=1 SV=1	-0.048881	0.352429	-0.0785873	0.153583	-0.0297063	0.0815085	0.14096	0.0518022	0.326276
Thioredoxin-like protein 1	Txnl1	NO	sp|Q8CDN6|TXNL1_MOUSE Thioredoxin-like protein 1 OS=Mus musculus OX=10090 GN=Txnl1 PE=1 SV=3	0.0863146	0.0501957	0.04561	0.251476	-0.0407046	-0.00537747	0.886913	-0.046082	0.247067
Thioredoxin-interacting protein	Txnip	YES	sp|Q8BG60|TXNIP_MOUSE Thioredoxin-interacting protein OS=Mus musculus OX=10090 GN=Txnip PE=1 SV=1	0.587959	0.000463591	0.513125	0.00102925	-0.0748343	0.0279356	0.776535	-0.0468987	0.635591
Thioredoxin domain-containing protein 9	Txndc9	YES	sp|Q9CQ79|TXND9_MOUSE Thioredoxin domain-containing protein 9 OS=Mus musculus OX=10090 GN=Txndc9 PE=1 SV=1;tr|A0A0A6YVV3|A0A0A6YVV3_MOUSE Thioredoxin domain-containing protein 9 OS=Mus musculus OX=10090 GN=Txndc9 PE=1 SV=1;tr|A0A0A6YWP9|A0A0A6YWP9_MOUSE Th	-0.0584472	0.133407	-0.0418428	0.263405	0.0166044	-0.0977852	0.0252174	-0.0811808	0.0506711
Thioredoxin domain-containing protein 5	Txndc5	NO	tr|E9PXX7|E9PXX7_MOUSE Thioredoxin domain-containing protein 5 OS=Mus musculus OX=10090 GN=Txndc5 PE=1 SV=1;sp|Q91W90|TXND5_MOUSE Thioredoxin domain-containing protein 5 OS=Mus musculus OX=10090 GN=Txndc5 PE=1 SV=2;tr|A0A0R4J1Y7|A0A0R4J1Y7_MOUSE Thioredoxi	-0.00337768	0.908982	0.0422521	0.182108	0.0456298	0.0602817	0.0726359	0.105911	0.00765295
Thioredoxin domain-containing protein 17	Txndc17	NO	sp|Q9CQM5|TXD17_MOUSE Thioredoxin domain-containing protein 17 OS=Mus musculus OX=10090 GN=Txndc17 PE=1 SV=1	0.0123845	0.782472	-0.0684964	0.156925	-0.0808808	-0.0560683	0.235392	-0.136949	0.0158847
Thioredoxin domain-containing protein 12	Txndc12	NO	sp|Q9CQU0|TXD12_MOUSE Thioredoxin domain-containing protein 12 OS=Mus musculus OX=10090 GN=Txndc12 PE=1 SV=1	-0.0523831	0.36843	-0.0536812	0.357399	-0.00129812	0.0349974	0.541079	0.0336993	0.555783
Thioredoxin domain-containing protein 11	Txndc11	YES	sp|Q8K2W3|TXD11_MOUSE Thioredoxin domain-containing protein 11 OS=Mus musculus OX=10090 GN=Txndc11 PE=1 SV=1;tr|D3YU69|D3YU69_MOUSE Thioredoxin domain-containing protein 11 OS=Mus musculus OX=10090 GN=Txndc11 PE=1 SV=1;tr|D6RHA0|D6RHA0_MOUSE Thioredoxin do	-0.0484639	0.323021	-0.131097	0.0240392	-0.082633	0.187726	0.00457602	0.105093	0.0548545
Thioredoxin, mitochondrial	Txn2	NO	tr|G3UZY2|G3UZY2_MOUSE Thioredoxin, mitochondrial (Fragment) OS=Mus musculus OX=10090 GN=Txn2 PE=1 SV=1;sp|P97493|THIOM_MOUSE Thioredoxin, mitochondrial OS=Mus musculus OX=10090 GN=Txn2 PE=1 SV=1	-0.112208	0.168852	-0.0200539	0.791646	0.0921538	0.00676573	0.928813	0.0989195	0.218183
Thioredoxin	Txn	NO	sp|P10639|THIO_MOUSE Thioredoxin OS=Mus musculus OX=10090 GN=Txn PE=1 SV=3	0.235781	0.00092696	0.147835	0.0107418	-0.0879464	-0.0113276	0.798551	-0.099274	0.0535032
Gamma-taxilin	Txlng	YES	sp|Q8BHN1|TXLNG_MOUSE Gamma-taxilin OS=Mus musculus OX=10090 GN=Txlng PE=1 SV=1;tr|A2AFJ4|A2AFJ4_MOUSE Gamma-taxilin OS=Mus musculus OX=10090 GN=Txlng PE=1 SV=1	-0.229116	0.110777	-0.00305571	0.981235	0.22606	-0.326367	0.0356093	-0.100307	0.450101
Alpha-taxilin	Txlna	NO	sp|Q6PAM1|TXLNA_MOUSE Alpha-taxilin OS=Mus musculus OX=10090 GN=Txlna PE=1 SV=1	-0.0843871	0.134146	-0.0373409	0.477585	0.0470462	-0.139859	0.0264314	-0.0928128	0.10484
Twinfilin-2	Twf2	NO	sp|Q9Z0P5|TWF2_MOUSE Twinfilin-2 OS=Mus musculus OX=10090 GN=Twf2 PE=1 SV=1;tr|A0A1L1STC8|A0A1L1STC8_MOUSE Twinfilin-2 (Fragment) OS=Mus musculus OX=10090 GN=Twf2 PE=1 SV=1;tr|A0A1L1SU53|A0A1L1SU53_MOUSE Twinfilin-2 (Fragment) OS=Mus musculus OX=10090 GN=T	0.110543	0.00367776	0.0771433	0.0202355	-0.0333995	-0.0148741	0.581239	-0.0482736	0.103061
Twinfilin-1	Twf1	YES	sp|Q91YR1|TWF1_MOUSE Twinfilin-1 OS=Mus musculus OX=10090 GN=Twf1 PE=1 SV=2	0.100508	0.0581316	0.067485	0.172168	-0.0330227	0.0284347	0.541789	-0.00458802	0.920481
Golgi apparatus membrane protein TVP23 homolog B	Tvp23b	NO	sp|Q9D8T4|TV23B_MOUSE Golgi apparatus membrane protein TVP23 homolog B OS=Mus musculus OX=10090 GN=Tvp23b PE=1 SV=1	0.145106	0.0689586	0.017133	0.80685	-0.127973	0.0382322	0.588706	-0.0897412	0.225525
Tumor suppressor candidate 3	Tusc3	NO	sp|Q8BTV1|TUSC3_MOUSE Tumor suppressor candidate 3 OS=Mus musculus OX=10090 GN=Tusc3 PE=1 SV=1;tr|A0A1B0GRW4|A0A1B0GRW4_MOUSE Tumor suppressor candidate 3 (Fragment) OS=Mus musculus OX=10090 GN=Tusc3 PE=1 SV=1	-0.0722522	0.104617	-0.140557	0.00855715	-0.0683045	0.158628	0.00470355	0.0903236	0.0527345
Tumor suppressor candidate gene 1 protein homolog	Tusc1	YES	sp|Q673H1|TUSC1_MOUSE Tumor suppressor candidate gene 1 protein homolog OS=Mus musculus OX=10090 GN=Tusc1 PE=1 SV=1	-0.113916	0.191096	0.0203131	0.803607	0.134229	-0.164443	0.0752673	-0.0302148	0.712242
Tubby-related protein 3	Tulp3	YES	sp|O88413|TULP3_MOUSE Tubby-related protein 3 OS=Mus musculus OX=10090 GN=Tulp3 PE=1 SV=1	0.245992	0.000452517	0.247363	0.000437708	0.00137147	-0.498347	5.00123e-06	-0.496976	5.09377e-06
Elongation factor Tu, mitochondrial	Tufm	NO	sp|Q8BFR5|EFTU_MOUSE Elongation factor Tu, mitochondrial OS=Mus musculus OX=10090 GN=Tufm PE=1 SV=1	-0.0505351	0.171063	-0.0665137	0.0848629	-0.0159786	0.107245	0.014487	0.0912667	0.0285283
	Tubgcp6	NO	tr|E9Q6P4|E9Q6P4_MOUSE Gamma-tubulin complex component 6 OS=Mus musculus OX=10090 GN=Tubgcp6 PE=1 SV=1;sp|G5E8P0|GCP6_MOUSE Gamma-tubulin complex component 6 OS=Mus musculus OX=10090 GN=Tubgcp6 PE=1 SV=1	0.216001	0.00499006	0.103398	0.0940836	-0.112603	-0.427927	9.56134e-05	-0.54053	2.13186e-05
Gamma-tubulin complex component 5	Tubgcp5	YES	sp|Q8BKN5|GCP5_MOUSE Gamma-tubulin complex component 5 OS=Mus musculus OX=10090 GN=Tubgcp5 PE=2 SV=2;tr|A0A0U1RPY9|A0A0U1RPY9_MOUSE Gamma-tubulin complex component 5 (Fragment) OS=Mus musculus OX=10090 GN=Tubgcp5 PE=1 SV=1;tr|A0A0U1RPL6|A0A0U1RPL6_MOUSE Ga	0.295967	0.0502361	-0.118033	0.37687	-0.414001	0.150581	0.267974	-0.26342	0.0735929
Gamma-tubulin complex component 4	Tubgcp4	NO	tr|Q8BKL6|Q8BKL6_MOUSE Gamma-tubulin complex component OS=Mus musculus OX=10090 GN=Tubgcp4 PE=1 SV=1;tr|Q8BYN2|Q8BYN2_MOUSE Gamma-tubulin complex component OS=Mus musculus OX=10090 GN=Tubgcp4 PE=1 SV=1;sp|Q9D4F8|GCP4_MOUSE Gamma-tubulin complex component 4	0.0478245	0.188356	-0.041812	0.243178	-0.0896366	0.198431	0.000539825	0.108794	0.0130095
Gamma-tubulin complex component 3	Tubgcp3	YES	sp|P58854|GCP3_MOUSE Gamma-tubulin complex component 3 OS=Mus musculus OX=10090 GN=Tubgcp3 PE=1 SV=2	-0.127837	0.0105998	-0.0247971	0.522551	0.10304	-0.10119	0.0289551	0.00184931	0.961365
Gamma-tubulin complex component 2	Tubgcp2	NO	tr|A0A1B0GR08|A0A1B0GR08_MOUSE Gamma-tubulin complex component (Fragment) OS=Mus musculus OX=10090 GN=Tubgcp2 PE=1 SV=1;sp|Q921G8|GCP2_MOUSE Gamma-tubulin complex component 2 OS=Mus musculus OX=10090 GN=Tubgcp2 PE=1 SV=2	-0.0769172	0.137122	-0.0928353	0.0825145	-0.0159181	0.00519635	0.912788	-0.0107217	0.821479
Tubulin gamma-1 chain;Tubulin gamma-2 chain	Tubg1;Tubg2	NO	sp|P83887|TBG1_MOUSE Tubulin gamma-1 chain OS=Mus musculus OX=10090 GN=Tubg1 PE=1 SV=1;sp|Q8VCK3|TBG2_MOUSE Tubulin gamma-2 chain OS=Mus musculus OX=10090 GN=Tubg2 PE=1 SV=1	-0.0339236	0.2945	-0.0226937	0.473067	0.0112299	0.0764785	0.0381297	0.0877084	0.0222717
Tubulin beta-6 chain	Tubb6	NO	sp|Q922F4|TBB6_MOUSE Tubulin beta-6 chain OS=Mus musculus OX=10090 GN=Tubb6 PE=1 SV=1	0.129702	0.00978432	0.119194	0.0144048	-0.0105085	-0.0158221	0.679716	-0.0263306	0.49691
Tubulin beta-5 chain	Tubb5	NO	sp|P99024|TBB5_MOUSE Tubulin beta-5 chain OS=Mus musculus OX=10090 GN=Tubb5 PE=1 SV=1	-0.0243587	0.578641	-0.0150799	0.729096	0.00927877	-0.228763	0.000976213	-0.219484	0.00123678
Tubulin beta-4B chain	Tubb4b	NO	sp|P68372|TBB4B_MOUSE Tubulin beta-4B chain OS=Mus musculus OX=10090 GN=Tubb4b PE=1 SV=1	-0.079634	0.0842406	-0.119584	0.0195197	-0.0399502	-0.17394	0.00325074	-0.21389	0.00103873
Tubulin beta-3 chain	Tubb3	YES	sp|Q9ERD7|TBB3_MOUSE Tubulin beta-3 chain OS=Mus musculus OX=10090 GN=Tubb3 PE=1 SV=1	-0.0624957	0.607408	-0.351964	0.019411	-0.289468	0.00119755	0.992065	-0.28827	0.0425262
Tubulin beta-2A chain	Tubb2a	NO	sp|Q7TMM9|TBB2A_MOUSE Tubulin beta-2A chain OS=Mus musculus OX=10090 GN=Tubb2a PE=1 SV=1	0.0693793	0.0977625	-0.0534704	0.184276	-0.12285	-0.160281	0.00317639	-0.28313	0.000113794
Tubulin beta-1 chain	Tubb1	NO	sp|A2AQ07|TBB1_MOUSE Tubulin beta-1 chain OS=Mus musculus OX=10090 GN=Tubb1 PE=1 SV=1	-0.119545	0.00586411	-0.134568	0.00318844	-0.0150233	-0.015788	0.620393	-0.0308114	0.345838
Tubulin alpha chain-like 3	Tubal3	YES	sp|Q3UX10|TBAL3_MOUSE Tubulin alpha chain-like 3 OS=Mus musculus OX=10090 GN=Tubal3 PE=2 SV=2	-0.214938	0.140054	-0.0660746	0.624337	0.148863	0.400317	0.0175056	0.54918	0.0038664
Tubulin alpha-8 chain	Tuba8	NO	sp|Q9JJZ2|TBA8_MOUSE Tubulin alpha-8 chain OS=Mus musculus OX=10090 GN=Tuba8 PE=1 SV=1	-0.0668263	0.0798928	-0.13484	0.00447915	-0.0680142	-0.0672792	0.0782785	-0.135293	0.00440266
Tubulin alpha-4A chain	Tuba4a	NO	sp|P68368|TBA4A_MOUSE Tubulin alpha-4A chain OS=Mus musculus OX=10090 GN=Tuba4a PE=1 SV=1;tr|A0A0A0MQA5|A0A0A0MQA5_MOUSE Tubulin alpha chain (Fragment) OS=Mus musculus OX=10090 GN=Tuba4a PE=1 SV=1	-0.0611573	0.159966	-0.154033	0.00557126	-0.0928757	-0.107364	0.0283089	-0.20024	0.00137159
	Tuba4a	NO	tr|A0A087WRB4|A0A087WRB4_MOUSE Tubulin alpha-4A chain (Fragment) OS=Mus musculus OX=10090 GN=Tuba4a PE=1 SV=1;tr|A0A087WSB0|A0A087WSB0_MOUSE Tubulin alpha-4A chain (Fragment) OS=Mus musculus OX=10090 GN=Tuba4a PE=1 SV=1;tr|A0A087WSL5|A0A087WSL5_MOUSE Tubul	-0.309439	0.10557	0.403114	0.0462245	0.712554	1.70304	1.99682e-05	2.4156	1.96671e-06
Tubulin alpha-1C chain	Tuba1c	NO	sp|P68373|TBA1C_MOUSE Tubulin alpha-1C chain OS=Mus musculus OX=10090 GN=Tuba1c PE=1 SV=1	-0.00270517	0.934845	0.0310276	0.363689	0.0337328	-0.108025	0.0119091	-0.0742925	0.0532335
Tubulin alpha-1A chain	Tuba1a	NO	sp|P68369|TBA1A_MOUSE Tubulin alpha-1A chain OS=Mus musculus OX=10090 GN=Tuba1a PE=1 SV=1	0.0133059	0.774157	-0.125293	0.0265037	-0.138599	-0.0637021	0.196707	-0.202301	0.00276768
Protein tweety homolog 3	Ttyh3	YES	sp|Q6P5F7|TTYH3_MOUSE Protein tweety homolog 3 OS=Mus musculus OX=10090 GN=Ttyh3 PE=1 SV=1	-0.123361	0.0221495	-0.065487	0.163553	0.0578741	-0.114659	0.0297439	-0.0567846	0.219049
Transthyretin	Ttr	YES	sp|P07309|TTHY_MOUSE Transthyretin OS=Mus musculus OX=10090 GN=Ttr PE=1 SV=1	0.0872112	0.545457	0.526087	0.00658207	0.438876	-0.831731	0.000536212	-0.392855	0.0245614
Alpha-tocopherol transfer protein-like	Ttpal	NO	sp|Q9D3D0|TTPAL_MOUSE Alpha-tocopherol transfer protein-like OS=Mus musculus OX=10090 GN=Ttpal PE=1 SV=3;tr|A2A5I7|A2A5I7_MOUSE Alpha-tocopherol transfer protein-like (Fragment) OS=Mus musculus OX=10090 GN=Ttpal PE=1 SV=8	0.0154747	0.857677	0.0839618	0.34656	0.0684871	-0.0782145	0.378506	-0.00972733	0.91018
Titin	Ttn	YES	tr|E9Q8N1|E9Q8N1_MOUSE Titin OS=Mus musculus OX=10090 GN=Ttn PE=1 SV=1;tr|E9Q8K5|E9Q8K5_MOUSE Titin OS=Mus musculus OX=10090 GN=Ttn PE=1 SV=1;sp|A2ASS6|TITIN_MOUSE Titin OS=Mus musculus OX=10090 GN=Ttn PE=1 SV=1	0.0130442	0.934026	0.264869	0.125415	0.251825	0.349572	0.0554334	0.601397	0.00562479
Tubulin--tyrosine ligase-like protein 12	Ttll12	NO	sp|Q3UDE2|TTL12_MOUSE Tubulin--tyrosine ligase-like protein 12 OS=Mus musculus OX=10090 GN=Ttll12 PE=1 SV=1	-0.00687561	0.806942	-0.0745681	0.0287149	-0.0676925	0.0475195	0.123264	-0.020173	0.480828
TELO2-interacting protein 1 homolog	Tti1	NO	sp|Q91V83|TTI1_MOUSE TELO2-interacting protein 1 homolog OS=Mus musculus OX=10090 GN=Tti1 PE=1 SV=2	0.0248847	0.801068	-0.224733	0.0504546	-0.249617	0.348593	0.00817053	0.0989759	0.332714
Tetratricopeptide repeat protein 9C	Ttc9c	YES	sp|Q810A3|TTC9C_MOUSE Tetratricopeptide repeat protein 9C OS=Mus musculus OX=10090 GN=Ttc9c PE=1 SV=1;tr|Q6P3Y6|Q6P3Y6_MOUSE Tetratricopeptide repeat protein 9C OS=Mus musculus OX=10090 GN=Ttc9c PE=1 SV=1	-0.0797161	0.610434	-0.176533	0.276519	-0.096817	0.182987	0.260849	0.0861699	0.582463
	Ttc7b	NO	sp|E9Q6P5|TTC7B_MOUSE Tetratricopeptide repeat protein 7B OS=Mus musculus OX=10090 GN=Ttc7b PE=1 SV=1;tr|A0A1Y7VL44|A0A1Y7VL44_MOUSE Tetratricopeptide repeat protein 7B OS=Mus musculus OX=10090 GN=Ttc7b PE=1 SV=1	0.0339812	0.282158	0.0391938	0.221025	0.00521258	0.0484113	0.141112	0.0536238	0.108822
Tetratricopeptide repeat protein 7A	Ttc7;Ttc7a	NO	tr|D3Z0R8|D3Z0R8_MOUSE Tetratricopeptide repeat domain 7 OS=Mus musculus OX=10090 GN=Ttc7 PE=1 SV=1;sp|Q8BGB2|TTC7A_MOUSE Tetratricopeptide repeat protein 7A OS=Mus musculus OX=10090 GN=Ttc7a PE=1 SV=1	-0.0549502	0.216416	-0.0384245	0.373545	0.0165257	0.0676736	0.138329	0.0841993	0.0761037
Tetratricopeptide repeat protein 5	Ttc5	YES	sp|Q99LG4|TTC5_MOUSE Tetratricopeptide repeat protein 5 OS=Mus musculus OX=10090 GN=Ttc5 PE=1 SV=2	-0.114136	0.0112442	-0.0346355	0.333275	0.079501	-0.0691614	0.0769391	0.0103396	0.765318
Tetratricopeptide repeat protein 4	Ttc4	NO	tr|A2AVR1|A2AVR1_MOUSE Tetratricopeptide repeat protein 4 (Fragment) OS=Mus musculus OX=10090 GN=Ttc4 PE=1 SV=1;tr|A2AVQ9|A2AVQ9_MOUSE Tetratricopeptide repeat protein 4 OS=Mus musculus OX=10090 GN=Ttc4 PE=1 SV=1;sp|Q8R3H9|TTC4_MOUSE Tetratricopeptide repe	-0.0785927	0.374889	-0.0367604	0.670877	0.0418323	-0.354676	0.00376712	-0.312843	0.00710539
Tetratricopeptide repeat protein 39B	Ttc39b	YES	sp|Q8BYY4|TT39B_MOUSE Tetratricopeptide repeat protein 39B OS=Mus musculus OX=10090 GN=Ttc39b PE=1 SV=1	-0.0431017	0.225473	-0.193492	0.000584668	-0.150391	0.182544	0.000822509	0.0321535	0.354291
Tetratricopeptide repeat protein 38	Ttc38	NO	sp|A3KMP2|TTC38_MOUSE Tetratricopeptide repeat protein 38 OS=Mus musculus OX=10090 GN=Ttc38 PE=1 SV=2	-0.00306792	0.923876	-0.0156296	0.629367	-0.0125617	-0.00648409	0.840146	-0.0190458	0.558139
	Ttc37	NO	tr|F8VPK0|F8VPK0_MOUSE Tetratricopeptide repeat domain 37 OS=Mus musculus OX=10090 GN=Ttc37 PE=1 SV=1	-0.0223756	0.447654	-0.0226233	0.44286	-0.000247756	0.0417522	0.177343	0.0415045	0.1796
Tetratricopeptide repeat protein 28	Ttc28	YES	tr|A0A0A0MQN9|A0A0A0MQN9_MOUSE Tetratricopeptide repeat protein 28 OS=Mus musculus OX=10090 GN=Ttc28 PE=1 SV=1;sp|Q80XJ3|TTC28_MOUSE Tetratricopeptide repeat protein 28 OS=Mus musculus OX=10090 GN=Ttc28 PE=1 SV=3	0.100738	0.0629469	0.110947	0.0453299	0.010209	0.00723063	0.878293	0.0174397	0.713051
Tetratricopeptide repeat protein 27	Ttc27	NO	sp|Q8CD92|TTC27_MOUSE Tetratricopeptide repeat protein 27 OS=Mus musculus OX=10090 GN=Ttc27 PE=1 SV=2	0.11704	0.0441918	0.0150393	0.761669	-0.102	0.165664	0.0105429	0.0636635	0.223962
Tetratricopeptide repeat protein 1	Ttc1	NO	sp|Q91Z38|TTC1_MOUSE Tetratricopeptide repeat protein 1 OS=Mus musculus OX=10090 GN=Ttc1 PE=1 SV=1;tr|A2AJK8|A2AJK8_MOUSE Tetratricopeptide repeat protein 1 OS=Mus musculus OX=10090 GN=Ttc1 PE=1 SV=1	-0.0439242	0.134252	0.0547803	0.0727423	0.0987045	-0.223055	6.12147e-05	-0.124351	0.00203534
Thiosulfate sulfurtransferase/rhodanese-like domain-containing protein 3	Tstd3	NO	sp|Q9D0B5|TSTD3_MOUSE Thiosulfate sulfurtransferase/rhodanese-like domain-containing protein 3 OS=Mus musculus OX=10090 GN=Tstd3 PE=1 SV=1	0.0878666	0.0921642	-0.0338087	0.476955	-0.121675	0.266844	0.000608437	0.145168	0.0147484
GDP-L-fucose synthase	Tsta3	NO	sp|P23591|FCL_MOUSE GDP-L-fucose synthase OS=Mus musculus OX=10090 GN=Tsta3 PE=1 SV=3;tr|A0A2R8VHD0|A0A2R8VHD0_MOUSE GDP-L-fucose synthase OS=Mus musculus OX=10090 GN=Tsta3 PE=1 SV=1;tr|A0A2R8VI39|A0A2R8VI39_MOUSE GDP-L-fucose synthase OS=Mus musculus OX=1	0.0470579	0.173067	-0.00221685	0.944973	-0.0492747	0.123381	0.00544632	0.0741058	0.0484587
Thiosulfate sulfurtransferase	Tst	NO	sp|P52196|THTR_MOUSE Thiosulfate sulfurtransferase OS=Mus musculus OX=10090 GN=Tst PE=1 SV=3	-0.0448557	0.280577	0.147388	0.00648533	0.192244	-0.0178194	0.656228	0.174425	0.00272058
Protein TSSC1	Tssc1	NO	sp|Q8K0G5|EIPR1_MOUSE EARP-interacting protein OS=Mus musculus OX=10090 GN=Eipr1 PE=1 SV=2;tr|A0A1Y7VN36|A0A1Y7VN36_MOUSE EARP-interacting protein (Fragment) OS=Mus musculus OX=10090 GN=Eipr1 PE=1 SV=1	0.022935	0.552569	-0.0320229	0.412753	-0.0549579	-0.0650229	0.120683	-0.119981	0.0140233
Pre-rRNA-processing protein TSR2 homolog	Tsr2	NO	tr|Z4YL87|Z4YL87_MOUSE Pre-rRNA-processing protein TSR2 homolog OS=Mus musculus OX=10090 GN=Tsr2 PE=1 SV=1;tr|H7BWY8|H7BWY8_MOUSE Pre-rRNA-processing protein TSR2 homolog OS=Mus musculus OX=10090 GN=Tsr2 PE=1 SV=1;sp|Q8C8T8|TSR2_MOUSE Pre-rRNA-processing p	0.0475242	0.606466	0.13306	0.175202	0.085536	0.0418772	0.649153	0.127413	0.191843
Translocator protein	Tspo	NO	sp|P50637|TSPO_MOUSE Translocator protein OS=Mus musculus OX=10090 GN=Tspo PE=1 SV=1;tr|A0A140LIU9|A0A140LIU9_MOUSE Translocator protein (Fragment) OS=Mus musculus OX=10090 GN=Tspo PE=1 SV=2	0.0811102	0.453279	0.171259	0.137869	0.0901485	0.139666	0.214076	0.229815	0.0595737
Tetraspanin-9;Tetraspanin	Tspan9	YES	sp|Q8BJU2|TSN9_MOUSE Tetraspanin-9 OS=Mus musculus OX=10090 GN=Tspan9 PE=1 SV=1;tr|D3YXN7|D3YXN7_MOUSE Tetraspanin (Fragment) OS=Mus musculus OX=10090 GN=Tspan9 PE=1 SV=1	0.0552989	0.208134	0.106665	0.0320192	0.051366	0.184857	0.00244947	0.236223	0.000610543
Tetraspanin-8	Tspan8	NO	sp|Q8R3G9|TSN8_MOUSE Tetraspanin-8 OS=Mus musculus OX=10090 GN=Tspan8 PE=1 SV=1	0.27347	0.0369968	-0.0442823	0.689021	-0.317752	-0.13379	0.248148	-0.451542	0.00387704
Tetraspanin;Tetraspanin-6	Tspan6	YES	tr|Q99L96|Q99L96_MOUSE Tetraspanin OS=Mus musculus OX=10090 GN=Tspan6 PE=1 SV=1;sp|O70401|TSN6_MOUSE Tetraspanin-6 OS=Mus musculus OX=10090 GN=Tspan6 PE=1 SV=1;tr|H3BL26|H3BL26_MOUSE Tetraspanin-6 (Fragment) OS=Mus musculus OX=10090 GN=Tspan6 PE=1 SV=8	-0.216628	0.0196246	-0.147371	0.0793318	0.0692566	-0.0788071	0.308347	-0.00955055	0.897788
Tetraspanin-4;Tetraspanin	Tspan4	NO	sp|Q9DCK3|TSN4_MOUSE Tetraspanin-4 OS=Mus musculus OX=10090 GN=Tspan4 PE=1 SV=1;tr|D3Z0B7|D3Z0B7_MOUSE Tetraspanin (Fragment) OS=Mus musculus OX=10090 GN=Tspan4 PE=1 SV=1;tr|D3Z0T3|D3Z0T3_MOUSE Tetraspanin (Fragment) OS=Mus musculus OX=10090 GN=Tspan4 PE=1	-0.297599	0.0190543	-0.373238	0.0067311	-0.0756393	0.0138911	0.891079	-0.0617482	0.548017
Tetraspanin-33	Tspan33	NO	sp|Q8R3S2|TSN33_MOUSE Tetraspanin-33 OS=Mus musculus OX=10090 GN=Tspan33 PE=1 SV=1	0.548407	0.00241005	0.504549	0.00375479	-0.0438579	-0.341974	0.0232291	-0.385832	0.0138332
Tetraspanin-32	Tspan32	NO	tr|Q3U3L6|Q3U3L6_MOUSE Tetraspanin 32, isoform CRA_b OS=Mus musculus OX=10090 GN=Tspan32 PE=1 SV=1;sp|Q9JHH2|TSN32_MOUSE Tetraspanin-32 OS=Mus musculus OX=10090 GN=Tspan32 PE=2 SV=2;tr|Q7TNQ7|Q7TNQ7_MOUSE Tetraspanin 32, isoform CRA_e OS=Mus musculus OX=10	0.0263608	0.670381	0.139636	0.0512799	0.113275	-0.0386862	0.535422	0.0745885	0.24949
Tetraspanin-31	Tspan31	NO	sp|Q9CQ88|TSN31_MOUSE Tetraspanin-31 OS=Mus musculus OX=10090 GN=Tspan31 PE=1 SV=1	-0.195137	0.0138304	-0.196782	0.0133185	-0.0016453	0.153678	0.036919	0.152032	0.0384261
Tetraspanin;Tetraspanin-2	Tspan2	NO	tr|A0A0G2JDX4|A0A0G2JDX4_MOUSE Tetraspanin-2 (Fragment) OS=Mus musculus OX=10090 GN=Tspan2 PE=1 SV=1;tr|A0A0G2JEZ7|A0A0G2JEZ7_MOUSE Tetraspanin OS=Mus musculus OX=10090 GN=Tspan2 PE=1 SV=1;tr|Q9D1X8|Q9D1X8_MOUSE Tetraspanin OS=Mus musculus OX=10090 GN=Tspa	0.108939	0.246427	-0.0427215	0.634882	-0.15166	0.554121	0.000373177	0.402461	0.00234634
Tetraspanin-18	Tspan18	NO	sp|Q80WR1|TSN18_MOUSE Tetraspanin-18 OS=Mus musculus OX=10090 GN=Tspan18 PE=2 SV=1	0.21931	0.100627	0.410266	0.00963465	0.190956	-0.22212	0.0971149	-0.0311632	0.795678
Tetraspanin-14	Tspan14	YES	sp|Q8QZY6|TSN14_MOUSE Tetraspanin-14 OS=Mus musculus OX=10090 GN=Tspan14 PE=1 SV=1	0.0631294	0.125528	0.0178146	0.638163	-0.0453148	0.189046	0.00128044	0.143732	0.00555787
Tetraspanin-13	Tspan13	NO	sp|Q9D8C2|TSN13_MOUSE Tetraspanin-13 OS=Mus musculus OX=10090 GN=Tspan13 PE=1 SV=1	0.244698	0.00082302	0.114269	0.0342244	-0.13043	0.285166	0.000331688	0.154736	0.00937491
Translin-associated protein X	Tsnax	NO	sp|Q9QZE7|TSNAX_MOUSE Translin-associated protein X OS=Mus musculus OX=10090 GN=Tsnax PE=1 SV=1;tr|A0A1D5RLR0|A0A1D5RLR0_MOUSE Translin-associated protein X OS=Mus musculus OX=10090 GN=Tsnax PE=1 SV=1	0.0145697	0.618605	-0.014907	0.61066	-0.0294767	-0.058306	0.0760293	-0.0877827	0.0166764
Translin	Tsn	NO	sp|Q62348|TSN_MOUSE Translin OS=Mus musculus OX=10090 GN=Tsn PE=1 SV=1	-0.0209421	0.639272	-0.0516214	0.266779	-0.0306793	-0.00712907	0.872286	-0.0378084	0.406035
Tsukushin	Tsku	YES	sp|Q8CBR6|TSK_MOUSE Tsukushin OS=Mus musculus OX=10090 GN=Tsku PE=2 SV=2	0.222443	0.0224412	0.113334	0.180034	-0.109109	0.180807	0.0493942	0.0716972	0.377239
Tumor susceptibility gene 101 protein	Tsg101	NO	sp|Q61187|TS101_MOUSE Tumor susceptibility gene 101 protein OS=Mus musculus OX=10090 GN=Tsg101 PE=1 SV=2;tr|A0A1B0GS09|A0A1B0GS09_MOUSE Tumor susceptibility gene 101 protein (Fragment) OS=Mus musculus OX=10090 GN=Tsg101 PE=1 SV=1	-0.0435758	0.355844	-0.0282748	0.541588	0.0153011	0.24207	0.00095156	0.257371	0.00066615
Elongation factor Ts, mitochondrial	Tsfm	NO	sp|Q9CZR8|EFTS_MOUSE Elongation factor Ts, mitochondrial OS=Mus musculus OX=10090 GN=Tsfm PE=1 SV=1;tr|Q9CX33|Q9CX33_MOUSE Elongation factor Ts, mitochondrial OS=Mus musculus OX=10090 GN=Tsfm PE=1 SV=1	0.0208081	0.469248	0.0409814	0.17588	0.0201733	0.146727	0.00105473	0.1669	0.000496748
TSC22 domain family protein 4	Tsc22d4	NO	sp|Q9EQN3|T22D4_MOUSE TSC22 domain family protein 4 OS=Mus musculus OX=10090 GN=Tsc22d4 PE=1 SV=2;tr|Q3U1U6|Q3U1U6_MOUSE TSC22 domain family protein 4 OS=Mus musculus OX=10090 GN=Tsc22d4 PE=1 SV=1	-0.0857468	0.204116	-0.0218209	0.731841	0.0639259	-0.274378	0.002936	-0.210452	0.0110347
TSC22 domain family protein 3	Tsc22d3	NO	tr|B1AVF2|B1AVF2_MOUSE TSC22 domain family protein 3 OS=Mus musculus OX=10090 GN=Tsc22d3 PE=1 SV=1;sp|Q9Z2S7|T22D3_MOUSE TSC22 domain family protein 3 OS=Mus musculus OX=10090 GN=Tsc22d3 PE=1 SV=2	0.0256915	0.891965	-0.185003	0.344484	-0.210694	0.341979	0.10339	0.131284	0.495141
	Tsc22d2	YES	tr|A0A0G2JFZ4|A0A0G2JFZ4_MOUSE MCG8104 OS=Mus musculus OX=10090 GN=Tsc22d2 PE=1 SV=1;tr|E9Q7M2|E9Q7M2_MOUSE TSC22 domain family, member 2 OS=Mus musculus OX=10090 GN=Tsc22d2 PE=1 SV=1	-0.0355212	0.631007	0.114368	0.150361	0.149889	-0.53062	0.000146066	-0.380731	0.00107035
TSC22 domain family protein 1	Tsc22d1	NO	tr|D3Z0V7|D3Z0V7_MOUSE TSC22 domain family protein 1 OS=Mus musculus OX=10090 GN=Tsc22d1 PE=1 SV=1;tr|E9QLZ1|E9QLZ1_MOUSE TSC22 domain family protein 1 OS=Mus musculus OX=10090 GN=Tsc22d1 PE=1 SV=1;sp|P62500|T22D1_MOUSE TSC22 domain family protein 1 OS=Mus	0.146264	0.142646	0.217468	0.0439504	0.0712035	-0.209508	0.0501205	-0.138304	0.162335
Tuberin	Tsc2	NO	tr|A0A2I3BRT5|A0A2I3BRT5_MOUSE Tuberin OS=Mus musculus OX=10090 GN=Tsc2 PE=1 SV=1;tr|Q7TT21|Q7TT21_MOUSE Tuberin OS=Mus musculus OX=10090 GN=Tsc2 PE=1 SV=1;tr|A0A2I3BPP1|A0A2I3BPP1_MOUSE Tuberin OS=Mus musculus OX=10090 GN=Tsc2 PE=1 SV=1;tr|Q3UHB2|Q3UHB2_M	-0.0792729	0.0580313	0.0912229	0.0352538	0.170496	-0.0798715	0.0565922	0.0906244	0.0361379
Hamartin	Tsc1	NO	sp|Q9EP53|TSC1_MOUSE Hamartin OS=Mus musculus OX=10090 GN=Tsc1 PE=1 SV=1	-0.113697	0.109471	-0.0658926	0.32297	0.0478049	0.0748438	0.266449	0.122649	0.0885916
Transformation/transcription domain-associated protein	Trrap	YES	tr|F7CGG2|F7CGG2_MOUSE Transformation/transcription domain-associated protein (Fragment) OS=Mus musculus OX=10090 GN=Trrap PE=1 SV=1;tr|E9PZA7|E9PZA7_MOUSE Transformation/transcription domain-associated protein OS=Mus musculus OX=10090 GN=Trrap PE=1 SV=1;t	0.160125	0.0222457	0.0044809	0.936903	-0.155644	0.129449	0.0499644	-0.0261946	0.646133
Transient receptor potential cation channel subfamily V member 2	Trpv2	NO	sp|Q9WTR1|TRPV2_MOUSE Transient receptor potential cation channel subfamily V member 2 OS=Mus musculus OX=10090 GN=Trpv2 PE=1 SV=2	0.253168	0.000308607	0.0507374	0.225114	-0.20243	-0.0180068	0.650969	-0.220437	0.000705201
Transient receptor potential cation channel subfamily M member 7	Trpm7	YES	tr|A2AI57|A2AI57_MOUSE Transient receptor potential cation channel subfamily M member 7 OS=Mus musculus OX=10090 GN=Trpm7 PE=1 SV=1;sp|Q923J1|TRPM7_MOUSE Transient receptor potential cation channel subfamily M member 7 OS=Mus musculus OX=10090 GN=Trpm7 PE=	0.107952	0.0764986	0.069352	0.223594	-0.0386002	0.017383	0.747497	-0.0212172	0.694914
Short transient receptor potential channel 6	Trpc6	NO	sp|Q61143|TRPC6_MOUSE Short transient receptor potential channel 6 OS=Mus musculus OX=10090 GN=Trpc6 PE=1 SV=3;tr|Q3UZG1|Q3UZG1_MOUSE Short transient receptor potential channel 6 OS=Mus musculus OX=10090 GN=Trpc6 PE=1 SV=1	-0.0960418	0.00999071	-0.0229552	0.428817	0.0730866	0.039958	0.187463	0.113045	0.00448392
60 kDa SS-A/Ro ribonucleoprotein	Trove2	YES	sp|O08848|RO60_MOUSE 60 kDa SS-A/Ro ribonucleoprotein OS=Mus musculus OX=10090 GN=Trove2 PE=1 SV=1	0.0336967	0.527557	0.0597531	0.277255	0.0260565	-0.00802636	0.878655	0.0180301	0.732552
CCA tRNA nucleotidyltransferase 1, mitochondrial	Trnt1	YES	sp|Q8K1J6|TRNT1_MOUSE CCA tRNA nucleotidyltransferase 1, mitochondrial OS=Mus musculus OX=10090 GN=Trnt1 PE=1 SV=1	0.0214907	0.586661	0.0677774	0.115787	0.0462867	0.019014	0.629664	0.0653007	0.127394
Mitochondrial tRNA-specific 2-thiouridylase 1	Trmu	NO	sp|Q9DAT5|MTU1_MOUSE Mitochondrial tRNA-specific 2-thiouridylase 1 OS=Mus musculus OX=10090 GN=Trmu PE=1 SV=1;tr|E0CZ49|E0CZ49_MOUSE Mitochondrial tRNA-specific 2-thiouridylase 1 OS=Mus musculus OX=10090 GN=Trmu PE=1 SV=1	0.145293	0.0124245	0.217329	0.00159695	0.0720355	-0.210845	0.00188919	-0.13881	0.0152457
Probable tRNA (uracil-O(2)-)-methyltransferase	Trmt44	NO	sp|Q9D2Q2|TRM44_MOUSE Probable tRNA (uracil-O(2)-)-methyltransferase OS=Mus musculus OX=10090 GN=Trmt44 PE=2 SV=2	0.103928	0.240166	0.0418986	0.620573	-0.0620291	-0.0474069	0.576386	-0.109436	0.2186
Multifunctional methyltransferase subunit TRM112-like protein	Trmt112	NO	sp|Q9DCG9|TR112_MOUSE Multifunctional methyltransferase subunit TRM112-like protein OS=Mus musculus OX=10090 GN=Trmt112 PE=1 SV=1;tr|Q8VCR4|Q8VCR4_MOUSE 0610038D11Rik protein OS=Mus musculus OX=10090 GN=Trmt112 PE=1 SV=1	-0.120784	0.0879301	0.0590611	0.36422	0.179845	-0.0948789	0.16325	0.0849663	0.205599
tRNA (guanine(10)-N2)-methyltransferase homolog	Trmt11	YES	tr|E9QKG3|E9QKG3_MOUSE tRNA (guanine(10)-N2)-methyltransferase homolog OS=Mus musculus OX=10090 GN=Trmt11 PE=1 SV=1;sp|Q9CWH5|TRM11_MOUSE tRNA (guanine(10)-N2)-methyltransferase homolog OS=Mus musculus OX=10090 GN=Trmt11 PE=1 SV=1	0.0198736	0.720477	0.0442044	0.434705	0.0243308	-0.00323365	0.953349	0.0210971	0.70423
Mitochondrial ribonuclease P protein 1	Trmt10c	NO	sp|Q3UFY8|TM10C_MOUSE tRNA methyltransferase 10 homolog C OS=Mus musculus OX=10090 GN=Trmt10c PE=1 SV=2	-0.0158216	0.728062	-0.10441	0.0486368	-0.0885883	0.0919032	0.073999	0.00331495	0.941666
Triple QxxK/R motif-containing protein	Triqk	YES	sp|B2B9E1|TRIQK_MOUSE Triple QxxK/R motif-containing protein OS=Mus musculus OX=10090 GN=Triqk PE=2 SV=1	0.523188	0.000372023	0.182794	0.0595534	-0.340394	-0.180767	0.061775	-0.52116	0.000380832
Thyroid receptor-interacting protein 6	Trip6	NO	sp|Q9Z1Y4|TRIP6_MOUSE Thyroid receptor-interacting protein 6 OS=Mus musculus OX=10090 GN=Trip6 PE=1 SV=1	-0.300541	0.161918	0.292425	0.171987	0.592966	-0.588183	0.018505	0.00478232	0.980825
Activating signal cointegrator 1	Trip4	NO	sp|Q9QXN3|TRIP4_MOUSE Activating signal cointegrator 1 OS=Mus musculus OX=10090 GN=Trip4 PE=1 SV=2	0.0241208	0.786393	0.105224	0.259261	0.0811031	-0.509209	0.000600373	-0.428106	0.00162636
Pachytene checkpoint protein 2 homolog	Trip13	YES	sp|Q3UA06|PCH2_MOUSE Pachytene checkpoint protein 2 homolog OS=Mus musculus OX=10090 GN=Trip13 PE=1 SV=1	-0.0218291	0.531715	0.0959916	0.0235078	0.117821	0.0321262	0.365377	0.149947	0.00281984
E3 ubiquitin-protein ligase TRIP12	Trip12	YES	tr|A0A087WNZ7|A0A087WNZ7_MOUSE E3 ubiquitin-protein ligase TRIP12 OS=Mus musculus OX=10090 GN=Trip12 PE=1 SV=1;sp|G5E870|TRIPC_MOUSE E3 ubiquitin-protein ligase TRIP12 OS=Mus musculus OX=10090 GN=Trip12 PE=1 SV=1	0.0799684	0.0802596	0.000950414	0.981266	-0.0790179	-0.0434155	0.303307	-0.122433	0.0167538
	Trip11	YES	tr|E9Q512|E9Q512_MOUSE Thyroid hormone receptor interactor 11 OS=Mus musculus OX=10090 GN=Trip11 PE=1 SV=1;tr|H3BJG4|H3BJG4_MOUSE Thyroid hormone receptor interactor 11 (Fragment) OS=Mus musculus OX=10090 GN=Trip11 PE=1 SV=1	-0.0753022	0.244202	0.0382538	0.538737	0.113556	-0.00984147	0.872635	0.103715	0.123579
Cdc42-interacting protein 4	Trip10	NO	sp|Q8CJ53|CIP4_MOUSE Cdc42-interacting protein 4 OS=Mus musculus OX=10090 GN=Trip10 PE=1 SV=2	0.0353011	0.376603	0.0249624	0.525738	-0.0103386	0.0172432	0.658606	0.00690454	0.858692
TRIO and F-actin-binding protein	Triobp	YES	tr|A0A2U3TZ82|A0A2U3TZ82_MOUSE TRIO and F-actin-binding protein OS=Mus musculus OX=10090 GN=Triobp PE=4 SV=1;sp|Q99KW3|TARA_MOUSE TRIO and F-actin-binding protein OS=Mus musculus OX=10090 GN=Triobp PE=1 SV=3;tr|G5E8W1|G5E8W1_MOUSE TRIO and F-actin-binding	0.0891896	0.181845	0.079758	0.226561	-0.00943155	-0.0184036	0.768411	-0.0278351	0.657422
Tripartite motif-containing protein 65	Trim65	NO	sp|Q8BFW4|TRI65_MOUSE Tripartite motif-containing protein 65 OS=Mus musculus OX=10090 GN=Trim65 PE=1 SV=1	0.141866	0.201459	0.0229905	0.825667	-0.118875	0.0398297	0.70381	-0.0790454	0.45766
E3 ubiquitin-protein ligase TRIM58	Trim58	NO	sp|Q5NCC9|TRI58_MOUSE E3 ubiquitin-protein ligase TRIM58 OS=Mus musculus OX=10090 GN=Trim58 PE=2 SV=1	0.00274903	0.970278	0.0155174	0.833688	0.0127684	-0.105317	0.182986	-0.0925491	0.235123
E3 ubiquitin-protein ligase TRIM56	Trim56	NO	tr|A0A0R4J0Q6|A0A0R4J0Q6_MOUSE E3 ubiquitin-protein ligase TRIM56 OS=Mus musculus OX=10090 GN=Trim56 PE=1 SV=1;sp|Q80VI1|TRI56_MOUSE E3 ubiquitin-protein ligase TRIM56 OS=Mus musculus OX=10090 GN=Trim56 PE=1 SV=1;tr|D3YVX5|D3YVX5_MOUSE E3 ubiquitin-protein	0.096069	0.0290043	0.161835	0.00248929	0.0657662	-0.18964	0.0010285	-0.123874	0.00965185
Tripartite motif-containing protein 47	Trim47	NO	sp|Q8C0E3|TRI47_MOUSE Tripartite motif-containing protein 47 OS=Mus musculus OX=10090 GN=Trim47 PE=1 SV=2	0.0699709	0.0657079	0.0425026	0.226692	-0.0274682	-0.0189482	0.572969	-0.0464165	0.191116
Tripartite motif-containing protein 42	Trim42	NO	sp|Q9D2H5|TRI42_MOUSE Tripartite motif-containing protein 42 OS=Mus musculus OX=10090 GN=Trim42 PE=2 SV=2	-0.037311	0.827994	-0.0783197	0.650324	-0.0410087	-1.12672	0.000265033	-1.16773	0.000212828
Tripartite motif-containing protein 34A	Trim34a;Trim34b	NO	tr|E9PYZ4|E9PYZ4_MOUSE Tripartite motif-containing protein 34A OS=Mus musculus OX=10090 GN=Trim34a PE=1 SV=2;sp|Q99PP6|TR34A_MOUSE Tripartite motif-containing protein 34A OS=Mus musculus OX=10090 GN=Trim34a PE=2 SV=2;tr|K7N6K2|K7N6K2_MOUSE Tripartite motif	-0.0474678	0.214589	0.0967766	0.0274274	0.144244	-0.136855	0.00575419	0.0073891	0.837687
	Trim30d	YES	tr|E9PWL0|E9PWL0_MOUSE Tripartite motif-containing 30D OS=Mus musculus OX=10090 GN=Trim30d PE=1 SV=1	0.254148	0.0254953	0.18979	0.0723727	-0.0643585	-0.00517683	0.955549	-0.0695353	0.463327
Tripartite motif-containing protein 3	Trim3	YES	tr|Q3TDT0|Q3TDT0_MOUSE Tripartite motif-containing protein 3 OS=Mus musculus OX=10090 GN=Trim3 PE=1 SV=1;tr|D3YUY7|D3YUY7_MOUSE Tripartite motif protein 3, isoform CRA_a OS=Mus musculus OX=10090 GN=Trim3 PE=1 SV=2;sp|Q9R1R2|TRIM3_MOUSE Tripartite motif-con	-0.0852898	0.108401	-0.108754	0.0515391	-0.0234642	-0.0701026	0.174113	-0.0935668	0.0834168
Tripartite motif-containing protein 26	Trim26	NO	tr|J3QN94|J3QN94_MOUSE Tripartite motif-containing protein 26 OS=Mus musculus OX=10090 GN=Trim26 PE=1 SV=1;sp|Q99PN3|TRI26_MOUSE Tripartite motif-containing protein 26 OS=Mus musculus OX=10090 GN=Trim26 PE=2 SV=3;tr|B8JJ56|B8JJ56_MOUSE Tripartite motif-con	0.0727631	0.462133	0.138954	0.181277	0.0661907	-0.138501	0.182525	-0.0723103	0.464812
E3 ubiquitin/ISG15 ligase TRIM25	Trim25	NO	sp|Q61510|TRI25_MOUSE E3 ubiquitin/ISG15 ligase TRIM25 OS=Mus musculus OX=10090 GN=Trim25 PE=1 SV=2;tr|Q5SU71|Q5SU71_MOUSE E3 ubiquitin/ISG15 ligase TRIM25 OS=Mus musculus OX=10090 GN=Trim25 PE=1 SV=1;tr|Q5SU72|Q5SU72_MOUSE E3 ubiquitin/ISG15 ligase TRIM25	0.0164255	0.605399	0.0563678	0.106219	0.0399422	-0.225555	0.000155312	-0.185613	0.000509292
E3 ubiquitin-protein ligase TRIM23	Trim23	YES	sp|Q8BGX0|TRI23_MOUSE E3 ubiquitin-protein ligase TRIM23 OS=Mus musculus OX=10090 GN=Trim23 PE=2 SV=1	0.0468277	0.528883	0.0144801	0.843493	-0.0323475	-0.0720024	0.342431	-0.10435	0.183699
E3 ubiquitin-protein ligase TRIM21	Trim21	NO	tr|Q3U7K7|Q3U7K7_MOUSE E3 ubiquitin-protein ligase TRIM21 OS=Mus musculus OX=10090 GN=Trim21 PE=1 SV=1;sp|Q62191|RO52_MOUSE E3 ubiquitin-protein ligase TRIM21 OS=Mus musculus OX=10090 GN=Trim21 PE=1 SV=1	-0.167117	0.088593	-0.0691518	0.439729	0.0979656	0.0380602	0.665688	0.136026	0.151463
	Trim12c;Trim5	NO	tr|D3Z3L3|D3Z3L3_MOUSE Tripartite motif-containing 12C OS=Mus musculus OX=10090 GN=Trim12c PE=1 SV=2;tr|E9PV98|E9PV98_MOUSE Tripartite motif-containing 5 OS=Mus musculus OX=10090 GN=Trim5 PE=1 SV=1;tr|D3YYU4|D3YYU4_MOUSE Tripartite motif-containing 5 OS=Mu	-0.176715	0.0169987	0.0787983	0.206592	0.255513	-0.32464	0.000738311	-0.0691269	0.261524
TP53-regulated inhibitor of apoptosis 1	Triap1	NO	sp|Q9D8Z2|TRIA1_MOUSE TP53-regulated inhibitor of apoptosis 1 OS=Mus musculus OX=10090 GN=Triap1 PE=1 SV=1	-0.248919	0.0144412	0.0827165	0.317267	0.331636	-0.295829	0.0064118	0.0358068	0.655135
Three-prime repair exonuclease 1	Trex1	NO	sp|Q91XB0|TREX1_MOUSE Three-prime repair exonuclease 1 OS=Mus musculus OX=10090 GN=Trex1 PE=1 SV=2	0.191991	0.123671	0.0275896	0.808469	-0.164401	0.0927562	0.425471	-0.0716451	0.534231
Trem-like transcript 2 protein	Treml2	NO	sp|Q2LA85|TRML2_MOUSE Trem-like transcript 2 protein OS=Mus musculus OX=10090 GN=Treml2 PE=1 SV=2	-0.00582552	0.978687	0.0015733	0.994243	0.00739882	-0.0757739	0.729412	-0.0683751	0.754739
Trem-like transcript 1 protein	Treml1	NO	sp|Q8K558|TRML1_MOUSE Trem-like transcript 1 protein OS=Mus musculus OX=10090 GN=Treml1 PE=1 SV=2;tr|A6XA75|A6XA75_MOUSE Trem-like transcript 1 protein OS=Mus musculus OX=10090 GN=Treml1 PE=1 SV=1	0.157851	0.0120297	0.0294174	0.549268	-0.128434	-0.726004	1.25394e-06	-0.854438	4.16795e-07
Trafficking protein particle complex subunit 9	Trappc9	NO	sp|Q3U0M1|TPPC9_MOUSE Trafficking protein particle complex subunit 9 OS=Mus musculus OX=10090 GN=Trappc9 PE=1 SV=2	-0.0685832	0.0338428	-0.0188469	0.492054	0.0497363	0.0762791	0.0221718	0.126015	0.0019263
	Trappc8	NO	tr|A0A286YCX6|A0A286YCX6_MOUSE Trafficking protein particle complex 8 OS=Mus musculus OX=10090 GN=Trappc8 PE=1 SV=1;tr|E9PWG2|E9PWG2_MOUSE Trafficking protein particle complex 8 OS=Mus musculus OX=10090 GN=Trappc8 PE=1 SV=1;tr|E9PY51|E9PY51_MOUSE Trafficki	-0.0222025	0.667762	-0.0856824	0.127917	-0.0634799	0.052424	0.325574	-0.0110559	0.829866
Trafficking protein particle complex subunit 6B	Trappc6b	NO	sp|Q9D289|TPC6B_MOUSE Trafficking protein particle complex subunit 6B OS=Mus musculus OX=10090 GN=Trappc6b PE=1 SV=1;tr|A0A1W2P7S5|A0A1W2P7S5_MOUSE Trafficking protein particle complex subunit 6B OS=Mus musculus OX=10090 GN=Trappc6b PE=1 SV=1	-0.178464	0.00909455	0.163767	0.013529	0.342231	-0.148204	0.0208735	0.194027	0.00605651
Trafficking protein particle complex subunit 6A	Trappc6a	NO	sp|Q78XR0|TPC6A_MOUSE Trafficking protein particle complex subunit 6A OS=Mus musculus OX=10090 GN=Trappc6a PE=1 SV=1;tr|F6VKM0|F6VKM0_MOUSE Trafficking protein particle complex subunit 6A (Fragment) OS=Mus musculus OX=10090 GN=Trappc6a PE=1 SV=1	-0.0987065	0.0393655	0.0115684	0.775109	0.110275	-0.134845	0.0107206	-0.0245705	0.548301
Trafficking protein particle complex subunit 5	Trappc5	NO	sp|Q9CQA1|TPPC5_MOUSE Trafficking protein particle complex subunit 5 OS=Mus musculus OX=10090 GN=Trappc5 PE=1 SV=1	-0.137875	0.00421325	-0.0238685	0.492173	0.114006	0.0116085	0.734838	0.125614	0.00673849
Trafficking protein particle complex subunit 4	Trappc4	NO	sp|Q9ES56|TPPC4_MOUSE Trafficking protein particle complex subunit 4 OS=Mus musculus OX=10090 GN=Trappc4 PE=1 SV=1;tr|Q3V493|Q3V493_MOUSE Trafficking protein particle complex subunit 4 OS=Mus musculus OX=10090 GN=Trappc4 PE=1 SV=1	0.0270548	0.658118	-0.0070798	0.907166	-0.0341345	0.169102	0.0236849	0.134968	0.0549935
Trafficking protein particle complex subunit 3	Trappc3	NO	sp|O55013|TPPC3_MOUSE Trafficking protein particle complex subunit 3 OS=Mus musculus OX=10090 GN=Trappc3 PE=1 SV=1	-0.108187	0.115414	0.0165737	0.790782	0.124761	-0.123282	0.0799031	0.00147932	0.981058
Trafficking protein particle complex subunit 2-like protein	Trappc2l	NO	sp|Q9JME7|TPC2L_MOUSE Trafficking protein particle complex subunit 2-like protein OS=Mus musculus OX=10090 GN=Trappc2l PE=1 SV=1	0.0216918	0.597557	-0.0910709	0.0536681	-0.112763	0.0865126	0.06364	-0.0262501	0.524935
Trafficking protein particle complex subunit 2	Trappc2;0610009B22Rik	YES	sp|Q9CQP2|TPPC2_MOUSE Trafficking protein particle complex subunit 2 OS=Mus musculus OX=10090 GN=Trappc2 PE=1 SV=1;tr|Q8R3W2|Q8R3W2_MOUSE MCG6979, isoform CRA_a OS=Mus musculus OX=10090 GN=0610009B22Rik PE=2 SV=1	0.02638	0.709119	-0.0251425	0.722055	-0.0515225	0.0236763	0.73751	-0.0278462	0.693924
	Trappc13	NO	tr|J3QNW4|J3QNW4_MOUSE Trafficking protein particle complex subunit 13 OS=Mus musculus OX=10090 GN=Trappc13 PE=1 SV=1	-0.0383131	0.319056	-0.0616515	0.128261	-0.0233384	0.045199	0.246336	0.0218605	0.559768
Trafficking protein particle complex subunit 12	Trappc12	NO	sp|Q8K2L8|TPC12_MOUSE Trafficking protein particle complex subunit 12 OS=Mus musculus OX=10090 GN=Trappc12 PE=1 SV=2;tr|Q8C0C3|Q8C0C3_MOUSE Trafficking protein particle complex subunit 12 OS=Mus musculus OX=10090 GN=Trappc12 PE=1 SV=1	-0.110876	0.0919065	-0.0946541	0.139453	0.0162218	-0.0886282	0.162472	-0.0724065	0.242732
Trafficking protein particle complex subunit 11	Trappc11	NO	sp|B2RXC1|TPC11_MOUSE Trafficking protein particle complex subunit 11 OS=Mus musculus OX=10090 GN=Trappc11 PE=1 SV=1	-0.0517979	0.229223	0.0426434	0.313979	0.0944414	0.151251	0.00644234	0.245692	0.00044458
Trafficking protein particle complex subunit 10	Trappc10	YES	tr|F8VQF9|F8VQF9_MOUSE Trafficking protein particle complex subunit 10 OS=Mus musculus OX=10090 GN=Trappc10 PE=1 SV=1;sp|Q3TLI0|TPC10_MOUSE Trafficking protein particle complex subunit 10 OS=Mus musculus OX=10090 GN=Trappc10 PE=1 SV=2	-0.0576839	0.0856512	-0.0376261	0.232969	0.0200578	0.0710993	0.0432682	0.0911571	0.016052
Trafficking protein particle complex subunit 1	Trappc1	YES	sp|Q5NCF2|TPPC1_MOUSE Trafficking protein particle complex subunit 1 OS=Mus musculus OX=10090 GN=Trappc1 PE=1 SV=1;tr|B1ASW5|B1ASW5_MOUSE Trafficking protein particle complex 1, isoform CRA_a OS=Mus musculus OX=10090 GN=Trappc1 PE=1 SV=1;tr|B1ASW6|B1ASW6_M	0.0731722	0.527421	0.0437712	0.702646	-0.029401	0.0982794	0.401584	0.0688785	0.551251
Heat shock protein 75 kDa, mitochondrial	Trap1	NO	sp|Q9CQN1|TRAP1_MOUSE Heat shock protein 75 kDa, mitochondrial OS=Mus musculus OX=10090 GN=Trap1 PE=1 SV=1	0.0124976	0.696287	-0.0058788	0.85366	-0.0183764	0.171105	0.000878433	0.152728	0.00167442
Translocating chain-associated membrane protein 2	Tram2	NO	sp|Q924Z5|TRAM2_MOUSE Translocating chain-associated membrane protein 2 OS=Mus musculus OX=10090 GN=Tram2 PE=1 SV=1	-0.0366478	0.602514	-0.0131406	0.850531	0.0235072	0.132998	0.0887308	0.156505	0.053096
Translocating chain-associated membrane protein 1	Tram1	YES	sp|Q91V04|TRAM1_MOUSE Translocating chain-associated membrane protein 1 OS=Mus musculus OX=10090 GN=Tram1 PE=1 SV=3	0.00290349	0.95235	-0.156121	0.0128094	-0.159024	0.310042	0.000317316	0.151017	0.0148665
TRAF-type zinc finger domain-containing protein 1	Trafd1	YES	sp|Q3UDK1|TRAD1_MOUSE TRAF-type zinc finger domain-containing protein 1 OS=Mus musculus OX=10090 GN=Trafd1 PE=1 SV=1	0.0662933	0.21205	0.163105	0.0119438	0.0968118	-0.648412	3.30049e-06	-0.551601	9.66342e-06
E3 ubiquitin-protein ligase TRAF7	Traf7	YES	tr|F8WJF7|F8WJF7_MOUSE E3 ubiquitin-protein ligase TRAF7 OS=Mus musculus OX=10090 GN=Traf7 PE=1 SV=1;sp|Q922B6|TRAF7_MOUSE E3 ubiquitin-protein ligase TRAF7 OS=Mus musculus OX=10090 GN=Traf7 PE=1 SV=1;tr|Q8C2K8|Q8C2K8_MOUSE E3 ubiquitin-protein ligase TRAF	-0.0788603	0.0407754	-0.0438894	0.20552	0.0349709	-0.261859	7.52971e-05	-0.226888	0.000185092
TNF receptor-associated factor 6	Traf6	NO	sp|P70196|TRAF6_MOUSE TNF receptor-associated factor 6 OS=Mus musculus OX=10090 GN=Traf6 PE=1 SV=2	-0.194202	0.0587462	-0.365049	0.00390913	-0.170847	0.0142319	0.873147	-0.156615	0.111592
TNF receptor-associated factor 5	Traf5	NO	sp|P70191|TRAF5_MOUSE TNF receptor-associated factor 5 OS=Mus musculus OX=10090 GN=Traf5 PE=1 SV=1;tr|E9QMA6|E9QMA6_MOUSE TNF receptor-associated factor 5 OS=Mus musculus OX=10090 GN=Traf5 PE=1 SV=2	0.120638	0.103357	0.0925771	0.193744	-0.0280604	0.0231035	0.730147	-0.00495694	0.940748
TNF receptor-associated factor 3	Traf3	NO	tr|Q3UHJ1|Q3UHJ1_MOUSE TNF receptor-associated factor 3 OS=Mus musculus OX=10090 GN=Traf3 PE=1 SV=1;sp|Q60803|TRAF3_MOUSE TNF receptor-associated factor 3 OS=Mus musculus OX=10090 GN=Traf3 PE=1 SV=2	0.0758421	0.505636	-0.0497515	0.6593	-0.125594	0.291247	0.0312131	0.165653	0.169634
TNF receptor-associated factor 2	Traf2	NO	sp|P39429|TRAF2_MOUSE TNF receptor-associated factor 2 OS=Mus musculus OX=10090 GN=Traf2 PE=1 SV=1	-0.154775	0.0332943	0.388433	0.000306781	0.543209	-0.0600087	0.338673	0.4832	7.89211e-05
Tumor necrosis factor receptor type 1-associated DEATH domain protein	Tradd	NO	sp|Q3U0V2|TRADD_MOUSE Tumor necrosis factor receptor type 1-associated DEATH domain protein OS=Mus musculus OX=10090 GN=Tradd PE=1 SV=1	-0.00845526	0.861932	-0.0456808	0.362345	-0.0372256	-0.0346815	0.483447	-0.071907	0.169187
TraB domain-containing protein	Trabd	YES	sp|Q99JY4|TRABD_MOUSE TraB domain-containing protein OS=Mus musculus OX=10090 GN=Trabd PE=1 SV=1;tr|E9Q8R5|E9Q8R5_MOUSE TraB domain-containing protein OS=Mus musculus OX=10090 GN=Trabd PE=1 SV=1;tr|E9Q7A5|E9Q7A5_MOUSE TraB domain-containing protein (Fragme	-0.0231529	0.531296	-0.0553539	0.159754	-0.0322009	0.126772	0.00884591	0.0945713	0.0314112
Translationally-controlled tumor protein	Tpt1	NO	sp|P63028|TCTP_MOUSE Translationally-controlled tumor protein OS=Mus musculus OX=10090 GN=Tpt1 PE=1 SV=1;tr|D3YU75|D3YU75_MOUSE Translationally-controlled tumor protein OS=Mus musculus OX=10090 GN=Tpt1 PE=1 SV=1	0.0548592	0.166928	0.0949983	0.0321752	0.0401391	0.0172862	0.641534	0.0574253	0.150519
Protein-tyrosine sulfotransferase 2	Tpst2	NO	tr|Q3TQN1|Q3TQN1_MOUSE Protein-tyrosine sulfotransferase OS=Mus musculus OX=10090 GN=Tpst2 PE=1 SV=1;sp|O88856|TPST2_MOUSE Protein-tyrosine sulfotransferase 2 OS=Mus musculus OX=10090 GN=Tpst2 PE=1 SV=1	0.16872	0.0017864	0.0604714	0.121976	-0.108249	0.189567	0.000924159	0.0813178	0.0500951
Tumor protein p63-regulated gene 1-like protein	Tprg1l;Tprgl	NO	sp|Q9DBS2|TPRGL_MOUSE Tumor protein p63-regulated gene 1-like protein OS=Mus musculus OX=10090 GN=Tprg1l PE=1 SV=1;tr|B1AX95|B1AX95_MOUSE Transformation-related protein 63-regulated-like OS=Mus musculus OX=10090 GN=Tprgl PE=1 SV=1	0.0236654	0.474542	0.0174759	0.594201	-0.00618943	0.114033	0.00843829	0.107843	0.0109754
Tubulin polymerization-promoting protein	Tppp	YES	sp|Q7TQD2|TPPP_MOUSE Tubulin polymerization-promoting protein OS=Mus musculus OX=10090 GN=Tppp PE=1 SV=1	0.1243	0.294909	0.0196603	0.862892	-0.10464	-0.283419	0.0366804	-0.388059	0.00970447
Tripeptidyl-peptidase 2	Tpp2	YES	sp|Q64514|TPP2_MOUSE Tripeptidyl-peptidase 2 OS=Mus musculus OX=10090 GN=Tpp2 PE=1 SV=3;tr|A0A087WRC0|A0A087WRC0_MOUSE Tripeptidyl-peptidase 2 OS=Mus musculus OX=10090 GN=Tpp2 PE=1 SV=1	0.0786867	0.0159606	0.0043155	0.866918	-0.0743712	0.0538027	0.0672993	-0.0205685	0.434852
Tripeptidyl-peptidase 1	Tpp1	YES	sp|O89023|TPP1_MOUSE Tripeptidyl-peptidase 1 OS=Mus musculus OX=10090 GN=Tpp1 PE=1 SV=2	-0.233069	0.000671081	-0.102859	0.0371171	0.13021	-0.559734	2.50346e-06	-0.429524	1.45114e-05
Thiopurine S-methyltransferase	Tpmt	NO	tr|A0A0R4J018|A0A0R4J018_MOUSE Thiopurine S-methyltransferase OS=Mus musculus OX=10090 GN=Tpmt PE=1 SV=1;sp|O55060|TPMT_MOUSE Thiopurine S-methyltransferase OS=Mus musculus OX=10090 GN=Tpmt PE=1 SV=1;tr|D3Z380|D3Z380_MOUSE Thiopurine S-methyltransferase OS	-0.0373951	0.355933	-0.126599	0.0125104	-0.0892035	0.0151738	0.700258	-0.0740298	0.0915946
Tropomyosin alpha-4 chain	Tpm4	NO	sp|Q6IRU2|TPM4_MOUSE Tropomyosin alpha-4 chain OS=Mus musculus OX=10090 GN=Tpm4 PE=1 SV=3	0.0968832	0.200974	0.085298	0.253911	-0.0115852	0.00966165	0.89193	-0.00192352	0.978406
	Tpm3-rs7	YES	tr|D3Z2H9|D3Z2H9_MOUSE Uncharacterized protein OS=Mus musculus OX=10090 GN=Tpm3-rs7 PE=3 SV=1	-0.00526963	0.958859	-0.0295893	0.772767	-0.0243197	0.0561583	0.586735	0.0318386	0.756142
	Tpm3	YES	tr|E9Q5J9|E9Q5J9_MOUSE Tropomyosin alpha-3 chain OS=Mus musculus OX=10090 GN=Tpm3 PE=1 SV=1	-0.205178	0.156154	-0.0775106	0.566953	0.127667	-0.0807544	0.551258	0.0469128	0.726869
	Tpm3	YES	tr|E9Q7Q3|E9Q7Q3_MOUSE Tropomyosin alpha-3 chain OS=Mus musculus OX=10090 GN=Tpm3 PE=1 SV=1;tr|D3Z6I8|D3Z6I8_MOUSE Tropomyosin alpha-3 chain OS=Mus musculus OX=10090 GN=Tpm3 PE=1 SV=1	0.170012	0.0493032	0.0602416	0.427168	-0.109771	0.114499	0.153474	0.00472864	0.949084
	Tpm1	NO	tr|E9Q448|E9Q448_MOUSE Tropomyosin alpha-1 chain OS=Mus musculus OX=10090 GN=Tpm1 PE=1 SV=1	0.0876459	0.47491	-0.114314	0.35768	-0.20196	0.151094	0.234507	-0.0508662	0.674432
	Tpm1	NO	tr|F8WID5|F8WID5_MOUSE Tropomyosin alpha-1 chain OS=Mus musculus OX=10090 GN=Tpm1 PE=1 SV=1	-0.00367232	0.972974	-0.0767081	0.487284	-0.0730358	-0.0560761	0.608545	-0.129112	0.257208
	Tpm1	NO	tr|G5E8R1|G5E8R1_MOUSE Tropomyosin 1, alpha, isoform CRA_j OS=Mus musculus OX=10090 GN=Tpm1 PE=1 SV=1;tr|G5E8R0|G5E8R0_MOUSE Tropomyosin 1, alpha, isoform CRA_i OS=Mus musculus OX=10090 GN=Tpm1 PE=1 SV=1;tr|E9Q455|E9Q455_MOUSE Tropomyosin alpha-1 chain OS=	0.0373472	0.61629	-0.00843672	0.909044	-0.0457839	0.306044	0.00368361	0.260261	0.00830704
Tropomyosin alpha-1 chain	Tpm1	NO	tr|Q8BSH3|Q8BSH3_MOUSE Tropomyosin alpha-1 chain OS=Mus musculus OX=10090 GN=Tpm1 PE=1 SV=1;sp|P58771|TPM1_MOUSE Tropomyosin alpha-1 chain OS=Mus musculus OX=10090 GN=Tpm1 PE=1 SV=1;tr|E9Q452|E9Q452_MOUSE Tropomyosin alpha-1 chain OS=Mus musculus OX=10090	-0.0244085	0.739619	0.0550458	0.461075	0.0794543	-0.0593886	0.428009	0.0200657	0.784393
	Tpm1	NO	tr|B7ZNL3|B7ZNL3_MOUSE Tpm1 protein OS=Mus musculus OX=10090 GN=Tpm1 PE=1 SV=1	-0.112263	0.274992	-0.294389	0.0174015	-0.182126	0.357401	0.00711664	0.175275	0.107187
Thiamin pyrophosphokinase 1	Tpk1	YES	sp|Q9R0M5|TPK1_MOUSE Thiamin pyrophosphokinase 1 OS=Mus musculus OX=10090 GN=Tpk1 PE=1 SV=1	0.109689	0.0400597	-0.070325	0.15034	-0.180014	0.193685	0.00305028	0.0136713	0.762446
Triosephosphate isomerase	Tpi1	NO	sp|P17751|TPIS_MOUSE Triosephosphate isomerase OS=Mus musculus OX=10090 GN=Tpi1 PE=1 SV=4;tr|H7BXC3|H7BXC3_MOUSE Triosephosphate isomerase OS=Mus musculus OX=10090 GN=Tpi1 PE=1 SV=1	-0.0514178	0.193567	-0.0207045	0.580394	0.0307133	0.00886771	0.811069	0.039581	0.304699
Tumor protein D54	Tpd52l2	YES	tr|A2AUD5|A2AUD5_MOUSE Tumor protein D54 OS=Mus musculus OX=10090 GN=Tpd52l2 PE=1 SV=1;sp|Q9CYZ2|TPD54_MOUSE Tumor protein D54 OS=Mus musculus OX=10090 GN=Tpd52l2 PE=1 SV=1;tr|Q3TAI4|Q3TAI4_MOUSE Tumor protein D52-like 2, isoform CRA_c OS=Mus musculus OX=1	-0.0357656	0.556597	0.0048829	0.935188	0.0406485	-0.308356	0.00114056	-0.267707	0.00250136
Tumor protein D52	Tpd52	YES	tr|E9PUA7|E9PUA7_MOUSE Tumor protein D52 OS=Mus musculus OX=10090 GN=Tpd52 PE=1 SV=1;tr|F8WHQ1|F8WHQ1_MOUSE Tumor protein D52 OS=Mus musculus OX=10090 GN=Tpd52 PE=1 SV=1;sp|Q62393|TPD52_MOUSE Tumor protein D52 OS=Mus musculus OX=10090 GN=Tpd52 PE=1 SV=2;tr	0.150997	0.0352603	0.319632	0.000921068	0.168635	-0.749648	4.21868e-06	-0.581013	2.26561e-05
Two pore calcium channel protein 2	Tpcn2	NO	sp|Q8BWC0|TPC2_MOUSE Two pore calcium channel protein 2 OS=Mus musculus OX=10090 GN=Tpcn2 PE=1 SV=1;tr|A0A140LJI3|A0A140LJI3_MOUSE Two pore calcium channel protein 2 OS=Mus musculus OX=10090 GN=Tpcn2 PE=1 SV=1;tr|A0A140LJE2|A0A140LJE2_MOUSE Two pore calciu	0.0775785	0.122629	0.0353685	0.449402	-0.04221	0.188576	0.00379277	0.146366	0.0130507
Two pore calcium channel protein 1	Tpcn1	YES	sp|Q9EQJ0|TPC1_MOUSE Two pore calcium channel protein 1 OS=Mus musculus OX=10090 GN=Tpcn1 PE=1 SV=1	-0.0508862	0.261384	-0.0494878	0.273533	0.00139845	0.137671	0.0132093	0.13907	0.0126188
Torsin-4A	Tor4a	NO	sp|Q8BH02|TOR4A_MOUSE Torsin-4A OS=Mus musculus OX=10090 GN=Tor4a PE=2 SV=1	-0.0921001	0.0435935	-0.08732	0.0525458	0.00478003	0.0146016	0.707716	0.0193817	0.620143
Torsin-2A	Tor2a	YES	tr|H3BK73|H3BK73_MOUSE Prosalusin (Fragment) OS=Mus musculus OX=10090 GN=Tor2a PE=1 SV=1;sp|Q8R1J9|TOR2A_MOUSE Torsin-2A OS=Mus musculus OX=10090 GN=Tor2a PE=1 SV=1	-0.0716737	0.251792	-0.0603942	0.327455	0.0112795	0.145973	0.0387006	0.157252	0.0291394
Torsin-1B	Tor1b	YES	sp|Q9ER41|TOR1B_MOUSE Torsin-1B OS=Mus musculus OX=10090 GN=Tor1b PE=1 SV=2	-0.144561	0.142023	0.0710146	0.442757	0.215576	0.154267	0.120879	0.369843	0.00395843
Torsin-1A-interacting protein 2	Tor1aip2	YES	sp|Q8BYU6|TOIP2_MOUSE Torsin-1A-interacting protein 2 OS=Mus musculus OX=10090 GN=Tor1aip2 PE=1 SV=1	0.0414239	0.205215	0.0785781	0.0332029	0.0371541	0.120199	0.00495729	0.157353	0.00115646
Torsin-1A-interacting protein 1	Tor1aip1	NO	tr|E9PWW2|E9PWW2_MOUSE Torsin-1A-interacting protein 1 OS=Mus musculus OX=10090 GN=Tor1aip1 PE=1 SV=1;sp|Q921T2|TOIP1_MOUSE Torsin-1A-interacting protein 1 OS=Mus musculus OX=10090 GN=Tor1aip1 PE=1 SV=3	0.214722	0.0315673	0.0665216	0.432835	-0.1482	0.276883	0.0106809	0.128684	0.151805
Torsin-1A	Tor1a	YES	sp|Q9ER39|TOR1A_MOUSE Torsin-1A OS=Mus musculus OX=10090 GN=Tor1a PE=1 SV=1	0.292865	0.00289286	0.0511468	0.458055	-0.241718	0.0956259	0.185773	-0.146092	0.0601622
DNA topoisomerase 3-beta-1	Top3b	YES	sp|Q9Z321|TOP3B_MOUSE DNA topoisomerase 3-beta-1 OS=Mus musculus OX=10090 GN=Top3b PE=1 SV=1	-0.0325195	0.602415	-0.0996414	0.13898	-0.0671219	0.0808755	0.217375	0.0137536	0.824148
Mitochondrial import receptor subunit TOM70	Tomm70a	YES	sp|Q9CZW5|TOM70_MOUSE Mitochondrial import receptor subunit TOM70 OS=Mus musculus OX=10090 GN=Tomm70 PE=1 SV=2	-0.00306058	0.928636	-0.0035182	0.918009	-0.000457621	0.129201	0.00589498	0.128743	0.00600021
Mitochondrial import receptor subunit TOM6 homolog	Tomm6	YES	sp|Q9CQN3|TOM6_MOUSE Mitochondrial import receptor subunit TOM6 homolog OS=Mus musculus OX=10090 GN=Tomm6 PE=3 SV=1	0.0934858	0.133958	0.0850433	0.166989	-0.00844257	0.0669517	0.263973	0.0585091	0.323743
Mitochondrial import receptor subunit TOM5 homolog	Tomm5	NO	sp|B1AXP6|TOM5_MOUSE Mitochondrial import receptor subunit TOM5 homolog OS=Mus musculus OX=10090 GN=Tomm5 PE=3 SV=1	-0.114572	0.00659146	0.0943454	0.01628	0.208917	0.136825	0.00263721	0.345742	8.98314e-06
Mitochondrial import receptor subunit TOM40B	Tomm40l	NO	tr|M0QWR6|M0QWR6_MOUSE Mitochondrial import receptor subunit TOM40B OS=Mus musculus OX=10090 GN=Tomm40l PE=1 SV=1;tr|D3Z346|D3Z346_MOUSE Mitochondrial import receptor subunit TOM40B (Fragment) OS=Mus musculus OX=10090 GN=Tomm40l PE=1 SV=1;tr|D3YY29|D3YY29_	-0.092304	0.606427	-0.082953	0.642728	0.00935095	0.524102	0.0185263	0.533453	0.0171686
Mitochondrial import receptor subunit TOM40 homolog	Tomm40	NO	sp|Q9QYA2|TOM40_MOUSE Mitochondrial import receptor subunit TOM40 homolog OS=Mus musculus OX=10090 GN=Tomm40 PE=1 SV=3	0.0946279	0.0604211	0.139362	0.0133447	0.0447338	0.0956334	0.0583471	0.140367	0.0129186
Mitochondrial import receptor subunit TOM34	Tomm34	YES	sp|Q9CYG7|TOM34_MOUSE Mitochondrial import receptor subunit TOM34 OS=Mus musculus OX=10090 GN=Tomm34 PE=1 SV=1	-0.110716	0.0289789	-0.138091	0.0112588	-0.0273745	0.0532769	0.228217	0.0259024	0.541093
Mitochondrial import receptor subunit TOM22 homolog	Tomm22	NO	sp|Q9CPQ3|TOM22_MOUSE Mitochondrial import receptor subunit TOM22 homolog OS=Mus musculus OX=10090 GN=Tomm22 PE=1 SV=3;tr|A0A2R8VHM4|A0A2R8VHM4_MOUSE Mitochondrial import receptor subunit TOM22 homolog OS=Mus musculus OX=10090 GN=Tomm22 PE=1 SV=1	0.000728063	0.989784	0.0386202	0.504371	0.0378921	0.0854399	0.1638	0.123332	0.0598067
Mitochondrial import receptor subunit TOM20 homolog	Tomm20	NO	sp|Q9DCC8|TOM20_MOUSE Mitochondrial import receptor subunit TOM20 homolog OS=Mus musculus OX=10090 GN=Tomm20 PE=1 SV=1;tr|A0A1D5RLZ6|A0A1D5RLZ6_MOUSE Mitochondrial import receptor subunit TOM20 homolog OS=Mus musculus OX=10090 GN=Tomm20 PE=1 SV=1	-0.0267847	0.422968	0.0226913	0.494314	0.0494759	0.0330698	0.32844	0.0825458	0.0345894
TOM1-like protein 2	Tom1l2	NO	sp|Q5SRX1|TM1L2_MOUSE TOM1-like protein 2 OS=Mus musculus OX=10090 GN=Tom1l2 PE=1 SV=1;tr|Q5SXA5|Q5SXA5_MOUSE TOM1-like protein 2 OS=Mus musculus OX=10090 GN=Tom1l2 PE=1 SV=1;tr|Q5SXA4|Q5SXA4_MOUSE TOM1-like protein 2 OS=Mus musculus OX=10090 GN=Tom1l2 PE=	-0.0945794	0.00955692	-0.124716	0.00234044	-0.0301368	0.0272725	0.340572	-0.00286433	0.917452
TOM1-like protein 1	Tom1l1	YES	sp|Q923U0|TM1L1_MOUSE TOM1-like protein 1 OS=Mus musculus OX=10090 GN=Tom1l1 PE=1 SV=1;tr|Q8BZR6|Q8BZR6_MOUSE TOM1-like protein 1 OS=Mus musculus OX=10090 GN=Tom1l1 PE=1 SV=1;tr|A6PWP3|A6PWP3_MOUSE TOM1-like protein 1 (Fragment) OS=Mus musculus OX=10090 GN	0.0525146	0.182139	0.0158158	0.668758	-0.0366988	-0.228784	0.000366041	-0.265483	0.000146854
Target of Myb protein 1	Tom1	NO	tr|Q3UDC3|Q3UDC3_MOUSE Target of Myb protein 1 OS=Mus musculus OX=10090 GN=Tom1 PE=1 SV=1;sp|O88746|TOM1_MOUSE Target of Myb protein 1 OS=Mus musculus OX=10090 GN=Tom1 PE=1 SV=1	-0.0840426	0.0637682	-0.0979462	0.0374389	-0.0139035	-0.157113	0.00457643	-0.171016	0.00293754
Toll-interacting protein	Tollip	YES	sp|Q9QZ06|TOLIP_MOUSE Toll-interacting protein OS=Mus musculus OX=10090 GN=Tollip PE=1 SV=1;tr|F7AT44|F7AT44_MOUSE Toll-interacting protein OS=Mus musculus OX=10090 GN=Tollip PE=1 SV=2;tr|A9JEI5|A9JEI5_MOUSE Toll interacting protein, isoform CRA_b OS=Mus m	-0.100584	0.146488	-0.11884	0.0951161	-0.018256	0.03116	0.628118	0.012904	0.839843
	Tns1	NO	tr|A0A087WQ94|A0A087WQ94_MOUSE Tensin 1 (Fragment) OS=Mus musculus OX=10090 GN=Tns1 PE=1 SV=1;tr|A0A087WQM0|A0A087WQM0_MOUSE Tensin 1 OS=Mus musculus OX=10090 GN=Tns1 PE=1 SV=1;tr|A0A087WQS0|A0A087WQS0_MOUSE Tensin 1 OS=Mus musculus OX=10090 GN=Tns1 PE=1 S	0.157076	0.016553	0.0694025	0.207819	-0.0876731	-0.203797	0.0048218	-0.29147	0.000671712
Trinucleotide repeat-containing gene 6B protein	Tnrc6b	YES	sp|Q8BKI2|TNR6B_MOUSE Trinucleotide repeat-containing gene 6B protein OS=Mus musculus OX=10090 GN=Tnrc6b PE=1 SV=2;tr|A0A2I3BRG1|A0A2I3BRG1_MOUSE Trinucleotide repeat-containing gene 6B protein (Fragment) OS=Mus musculus OX=10090 GN=Tnrc6b PE=1 SV=1	-0.0208166	0.718191	0.0114865	0.841618	0.0323031	-0.60864	1.25686e-05	-0.576337	1.79731e-05
Transportin-3	Tnpo3	YES	sp|Q6P2B1|TNPO3_MOUSE Transportin-3 OS=Mus musculus OX=10090 GN=Tnpo3 PE=1 SV=1	-0.0475031	0.237897	-0.0549242	0.17942	-0.00742102	0.0457737	0.253716	0.0383527	0.332013
Transportin-2	Tnpo2	NO	sp|Q99LG2|TNPO2_MOUSE Transportin-2 OS=Mus musculus OX=10090 GN=Tnpo2 PE=1 SV=1;tr|E9PV58|E9PV58_MOUSE Transportin-2 OS=Mus musculus OX=10090 GN=Tnpo2 PE=1 SV=1	0.0619263	0.176937	0.178968	0.00347958	0.117042	-0.133633	0.0144208	-0.0165907	0.699237
Transportin-1	Tnpo1	YES	sp|Q8BFY9|TNPO1_MOUSE Transportin-1 OS=Mus musculus OX=10090 GN=Tnpo1 PE=1 SV=2;tr|Q3TKD0|Q3TKD0_MOUSE Transportin-1 (Fragment) OS=Mus musculus OX=10090 GN=Tnpo1 PE=1 SV=1	0.0666272	0.032531	0.0275188	0.307545	-0.0391084	0.0798953	0.0153755	0.0407869	0.147124
Tankyrase-1	Tnks	NO	sp|Q6PFX9|TNKS1_MOUSE Tankyrase-1 OS=Mus musculus OX=10090 GN=Tnks PE=1 SV=1	-0.0593392	0.536324	-0.173397	0.099588	-0.114058	0.143599	0.159945	0.0295412	0.755599
Activated CDC42 kinase 1	Tnk2	YES	tr|A0A0R4J1L0|A0A0R4J1L0_MOUSE Activated CDC42 kinase 1 OS=Mus musculus OX=10090 GN=Tnk2 PE=1 SV=1;tr|D3Z3U5|D3Z3U5_MOUSE Activated CDC42 kinase 1 OS=Mus musculus OX=10090 GN=Tnk2 PE=1 SV=1;tr|D3Z3U6|D3Z3U6_MOUSE Activated CDC42 kinase 1 OS=Mus musculus OX	0.0251471	0.581438	-0.0734925	0.135448	-0.0986396	-0.216103	0.00168393	-0.314742	0.000182976
TNFAIP3-interacting protein 1	Tnip1	NO	tr|D3Z2W0|D3Z2W0_MOUSE TNFAIP3-interacting protein 1 OS=Mus musculus OX=10090 GN=Tnip1 PE=1 SV=1;tr|E9QM75|E9QM75_MOUSE TNFAIP3-interacting protein 1 OS=Mus musculus OX=10090 GN=Tnip1 PE=1 SV=1;sp|Q9WUU8|TNIP1_MOUSE TNFAIP3-interacting protein 1 OS=Mus mus	-0.159851	0.0180106	-0.0325476	0.550226	0.127303	-0.214876	0.00444466	-0.0875728	0.135531
Traf2 and NCK-interacting protein kinase	Tnik	YES	sp|P83510|TNIK_MOUSE Traf2 and NCK-interacting protein kinase OS=Mus musculus OX=10090 GN=Tnik PE=1 SV=2;tr|E9PUL9|E9PUL9_MOUSE Traf2 and NCK-interacting protein kinase OS=Mus musculus OX=10090 GN=Tnik PE=1 SV=1;tr|B9EKN8|B9EKN8_MOUSE TRAF2 and NCK interac	0.0508114	0.148443	0.0419169	0.222098	-0.00889451	-0.417111	3.46513e-06	-0.426005	3.00934e-06
Tumor necrosis factor ligand superfamily member 14;Tumor necrosis factor ligand superfamily member 14, membrane form;Tumor necrosis factor ligand superfamily member 14, soluble form	Tnfsf14	NO	sp|Q9QYH9|TNF14_MOUSE Tumor necrosis factor ligand superfamily member 14 OS=Mus musculus OX=10090 GN=Tnfsf14 PE=2 SV=1	-0.0958833	0.261028	0.264134	0.0121253	0.360017	-0.14646	0.104278	0.213558	0.0298749
Tumor necrosis factor receptor superfamily member 21	Tnfrsf21	NO	sp|Q9EPU5|TNR21_MOUSE Tumor necrosis factor receptor superfamily member 21 OS=Mus musculus OX=10090 GN=Tnfrsf21 PE=1 SV=2	-0.0619028	0.388591	-0.041364	0.558434	0.0205388	0.0664029	0.357019	0.0869417	0.237875
Tumor necrosis factor alpha-induced protein 8-like protein 2	Tnfaip8l2	NO	sp|Q9D8Y7|TP8L2_MOUSE Tumor necrosis factor alpha-induced protein 8-like protein 2 OS=Mus musculus OX=10090 GN=Tnfaip8l2 PE=1 SV=1	-0.0374193	0.288547	-0.0166048	0.625847	0.0208145	-0.0649704	0.0866648	-0.044156	0.217579
Tumor necrosis factor alpha-induced protein 8	Tnfaip8	YES	sp|Q921Z5|TFIP8_MOUSE Tumor necrosis factor alpha-induced protein 8 OS=Mus musculus OX=10090 GN=Tnfaip8 PE=1 SV=1;tr|D3Z325|D3Z325_MOUSE Tumor necrosis factor alpha-induced protein 8 OS=Mus musculus OX=10090 GN=Tnfaip8 PE=1 SV=1;tr|D3YWJ5|D3YWJ5_MOUSE Tumo	0.102478	0.11113	0.113098	0.0842375	0.0106195	-0.0128826	0.825077	-0.0022631	0.968972
Tumor necrosis factor alpha-induced protein 3	Tnfaip3	YES	sp|Q60769|TNAP3_MOUSE Tumor necrosis factor alpha-induced protein 3 OS=Mus musculus OX=10090 GN=Tnfaip3 PE=1 SV=2	0.0671551	0.0632714	0.0416959	0.212847	-0.0254592	-0.104713	0.0109662	-0.130172	0.00374779
Thioredoxin-related transmembrane protein 4	Tmx4	YES	sp|Q8C0L0|TMX4_MOUSE Thioredoxin-related transmembrane protein 4 OS=Mus musculus OX=10090 GN=Tmx4 PE=1 SV=2;tr|A2ARI0|A2ARI0_MOUSE Thioredoxin-related transmembrane protein 4 OS=Mus musculus OX=10090 GN=Tmx4 PE=1 SV=1	-0.069525	0.325942	-0.202589	0.0180906	-0.133064	0.157036	0.048766	0.0239724	0.726346
Protein disulfide-isomerase TMX3	Tmx3	YES	sp|Q8BXZ1|TMX3_MOUSE Protein disulfide-isomerase TMX3 OS=Mus musculus OX=10090 GN=Tmx3 PE=1 SV=2	0.16553	0.000341031	0.0939847	0.00771437	-0.071545	0.328973	4.15492e-06	0.257428	2.09678e-05
Thioredoxin-related transmembrane protein 2	Tmx2	NO	tr|D3Z2J6|D3Z2J6_MOUSE Thioredoxin-related transmembrane protein 2 OS=Mus musculus OX=10090 GN=Tmx2 PE=1 SV=1;sp|Q9D710|TMX2_MOUSE Thioredoxin-related transmembrane protein 2 OS=Mus musculus OX=10090 GN=Tmx2 PE=1 SV=1	-0.0735684	0.416063	-0.0662288	0.46199	0.00733969	0.20264	0.0491606	0.20998	0.0433461
Thioredoxin-related transmembrane protein 1	Tmx1	YES	sp|Q8VBT0|TMX1_MOUSE Thioredoxin-related transmembrane protein 1 OS=Mus musculus OX=10090 GN=Tmx1 PE=1 SV=1	-0.00610635	0.890698	0.011758	0.79171	0.0178643	0.0792842	0.107152	0.0971485	0.0581194
Transmembrane and ubiquitin-like domain-containing protein 2	Tmub2	NO	tr|G8JL73|G8JL73_MOUSE Transmembrane and ubiquitin-like domain-containing protein 2 (Fragment) OS=Mus musculus OX=10090 GN=Tmub2 PE=1 SV=1;sp|Q3V209|TMUB2_MOUSE Transmembrane and ubiquitin-like domain-containing protein 2 OS=Mus musculus OX=10090 GN=Tmub2	0.143331	0.0270995	0.0516926	0.347528	-0.0916385	0.0703046	0.213343	-0.0213339	0.690073
Transmembrane and ubiquitin-like domain-containing protein 1	Tmub1	NO	tr|D3Z108|D3Z108_MOUSE Transmembrane and ubiquitin-like domain-containing protein 1 (Fragment) OS=Mus musculus OX=10090 GN=Tmub1 PE=1 SV=8;tr|E9QN77|E9QN77_MOUSE Transmembrane and ubiquitin-like domain-containing protein 1 OS=Mus musculus OX=10090 GN=Tmub1	0.0828197	0.512824	0.0727524	0.563924	-0.0100673	0.21287	0.120086	0.202803	0.135619
Transmembrane and TPR repeat-containing protein 3	Tmtc3	YES	tr|G5E8C4|G5E8C4_MOUSE MCG142017, isoform CRA_a OS=Mus musculus OX=10090 GN=Tmtc3 PE=1 SV=1;sp|Q8BRH0|TMTC3_MOUSE Transmembrane and TPR repeat-containing protein 3 OS=Mus musculus OX=10090 GN=Tmtc3 PE=1 SV=2;tr|A0A0R4J173|A0A0R4J173_MOUSE Transmembrane and	0.023852	0.591649	-0.0347757	0.439645	-0.0586277	0.238794	0.000828099	0.180166	0.00391963
Thymosin beta-10	Tmsb10	NO	sp|Q6ZWY8|TYB10_MOUSE Thymosin beta-10 OS=Mus musculus OX=10090 GN=Tmsb10 PE=1 SV=3;tr|A0A0N4SVF0|A0A0N4SVF0_MOUSE Thymosin beta-10 OS=Mus musculus OX=10090 GN=Tmsb10 PE=1 SV=1	0.206846	0.128335	0.332876	0.0276804	0.12603	-1.32822	1.18618e-05	-1.20219	2.2788e-05
	Tmppe	NO	tr|D3Z286|D3Z286_MOUSE Transmembrane protein with metallophosphoesterase domain OS=Mus musculus OX=10090 GN=Tmppe PE=1 SV=2	-0.0163948	0.580437	-0.0208513	0.485139	-0.00445651	0.219398	0.000118548	0.214941	0.000134809
Lamina-associated polypeptide 2, isoforms beta/delta/epsilon/gamma;Lamina-associated polypeptide 2, isoforms alpha/zeta	Tmpo	YES	sp|Q61029|LAP2B_MOUSE Lamina-associated polypeptide 2, isoforms beta/delta/epsilon/gamma OS=Mus musculus OX=10090 GN=Tmpo PE=1 SV=4;sp|Q61033|LAP2A_MOUSE Lamina-associated polypeptide 2, isoforms alpha/zeta OS=Mus musculus OX=10090 GN=Tmpo PE=1 SV=4	0.375521	0.00867829	0.167198	0.151391	-0.208323	0.168126	0.149453	-0.040197	0.709876
Tropomodulin-3	Tmod3	YES	sp|Q9JHJ0|TMOD3_MOUSE Tropomodulin-3 OS=Mus musculus OX=10090 GN=Tmod3 PE=1 SV=1	0.110076	0.0881949	0.147533	0.0328981	0.0374569	-0.174544	0.0165217	-0.137087	0.0432148
Tropomodulin-1	Tmod1	NO	sp|P49813|TMOD1_MOUSE Tropomodulin-1 OS=Mus musculus OX=10090 GN=Tmod1 PE=1 SV=2	0.584545	0.000301386	0.134529	0.169074	-0.450016	-0.0463128	0.613601	-0.496329	0.000798367
Trimethyllysine dioxygenase, mitochondrial	Tmlhe	NO	sp|Q91ZE0|TMLH_MOUSE Trimethyllysine dioxygenase, mitochondrial OS=Mus musculus OX=10090 GN=Tmlhe PE=1 SV=2	0.092231	0.111559	0.0874309	0.128077	-0.0048001	-0.00520575	0.920948	-0.0100059	0.848876
TATA element modulatory factor	Tmf1	YES	tr|D6RJK7|D6RJK7_MOUSE TATA element modulatory factor OS=Mus musculus OX=10090 GN=Tmf1 PE=1 SV=1;sp|B9EKI3|TMF1_MOUSE TATA element modulatory factor OS=Mus musculus OX=10090 GN=Tmf1 PE=1 SV=2	-0.0431232	0.750986	0.0239226	0.859889	0.0670459	0.125023	0.370606	0.192069	0.185315
Transmembrane protein 9B	Tmem9b	NO	sp|Q9JJR8|TMM9B_MOUSE Transmembrane protein 9B OS=Mus musculus OX=10090 GN=Tmem9b PE=1 SV=1;tr|D3Z6W5|D3Z6W5_MOUSE TMEM9 domain family, member B, isoform CRA_a OS=Mus musculus OX=10090 GN=Tmem9b PE=1 SV=1	0.0218996	0.549815	-0.0494564	0.199235	-0.071356	0.113948	0.0139162	0.042592	0.261559
Transmembrane protein 97	Tmem97	NO	sp|Q8VD00|SGMR2_MOUSE Sigma intracellular receptor 2 OS=Mus musculus OX=10090 GN=Tmem97 PE=1 SV=1	-0.466847	0.000199823	0.05941	0.394442	0.526257	0.0194578	0.774912	0.545715	7.51262e-05
Transmembrane protein 87B	Tmem87b	YES	tr|Z4YML9|Z4YML9_MOUSE Transmembrane protein 87B (Fragment) OS=Mus musculus OX=10090 GN=Tmem87b PE=1 SV=1;sp|Q8BKU8|TM87B_MOUSE Transmembrane protein 87B OS=Mus musculus OX=10090 GN=Tmem87b PE=2 SV=1	0.127177	0.0914545	0.234259	0.00883052	0.107082	0.130651	0.0845483	0.237733	0.00822997
Transmembrane protein 87A	Tmem87a	NO	tr|A2AQJ5|A2AQJ5_MOUSE Transmembrane protein 87A OS=Mus musculus OX=10090 GN=Tmem87a PE=1 SV=1;tr|A2AQJ6|A2AQJ6_MOUSE Transmembrane protein 87A OS=Mus musculus OX=10090 GN=Tmem87a PE=1 SV=1;sp|Q8BXN9|TM87A_MOUSE Transmembrane protein 87A OS=Mus musculus OX	-0.149252	0.00297775	-0.0300635	0.397673	0.119188	-0.154171	0.00250243	-0.0349821	0.329499
Lysoplasmalogenase	Tmem86b	NO	sp|Q497J1|TM86B_MOUSE Lysoplasmalogenase OS=Mus musculus OX=10090 GN=Tmem86b PE=2 SV=1	-0.148288	0.338357	0.153676	0.322295	0.301964	-0.134348	0.382828	0.167616	0.283576
Transmembrane protein 70, mitochondrial	Tmem70	YES	tr|A0A0R4J272|A0A0R4J272_MOUSE Transmembrane protein 70, mitochondrial OS=Mus musculus OX=10090 GN=Tmem70 PE=1 SV=1;sp|Q921N7|TMM70_MOUSE Transmembrane protein 70, mitochondrial OS=Mus musculus OX=10090 GN=Tmem70 PE=2 SV=2	-0.0589852	0.19052	0.00573606	0.891786	0.0647212	0.250891	0.000481376	0.315612	0.000117922
Transmembrane protein 69	Tmem69	NO	sp|Q3KQJ0|TMM69_MOUSE Transmembrane protein 69 OS=Mus musculus OX=10090 GN=Tmem69 PE=2 SV=2	0.00845536	0.91796	-0.131726	0.140568	-0.140182	0.317696	0.00523933	0.177514	0.0603256
Transmembrane protein 68	Tmem68	YES	sp|Q9D850|TMM68_MOUSE Transmembrane protein 68 OS=Mus musculus OX=10090 GN=Tmem68 PE=2 SV=1	-0.397996	0.000919978	-0.225835	0.0167306	0.172161	0.0489606	0.518568	0.221122	0.0183252
Meckelin	Tmem67	YES	tr|E9QNI1|E9QNI1_MOUSE Meckelin OS=Mus musculus OX=10090 GN=Tmem67 PE=1 SV=1;tr|A2AJP5|A2AJP5_MOUSE Meckelin OS=Mus musculus OX=10090 GN=Tmem67 PE=1 SV=1;sp|Q8BR76|MKS3_MOUSE Meckelin OS=Mus musculus OX=10090 GN=Tmem67 PE=1 SV=2	0.149393	0.0206318	0.0123774	0.811738	-0.137016	0.211278	0.00403403	0.0742619	0.18174
Transmembrane protein 65	Tmem65	YES	sp|Q4VAE3|TMM65_MOUSE Transmembrane protein 65 OS=Mus musculus OX=10090 GN=Tmem65 PE=1 SV=1	0.136541	0.172433	0.168695	0.102699	0.032154	0.311476	0.0106038	0.34363	0.00662262
CSC1-like protein 2	Tmem63b	NO	sp|Q3TWI9|CSCL2_MOUSE CSC1-like protein 2 OS=Mus musculus OX=10090 GN=Tmem63b PE=1 SV=1;tr|D3Z2D8|D3Z2D8_MOUSE CSC1-like protein 2 (Fragment) OS=Mus musculus OX=10090 GN=Tmem63b PE=1 SV=8	-0.063677	0.0889737	-0.180662	0.000843406	-0.116985	0.190618	0.000616284	0.0736335	0.0565079
CSC1-like protein 1	Tmem63a	NO	sp|Q91YT8|CSCL1_MOUSE CSC1-like protein 1 OS=Mus musculus OX=10090 GN=Tmem63a PE=1 SV=1	-0.15568	0.0307164	-0.218638	0.00686783	-0.0629581	0.18069	0.0166207	0.117732	0.0804052
Type 2 phosphatidylinositol 4,5-bisphosphate 4-phosphatase	Tmem55a	YES	sp|Q9CZX7|PP4P2_MOUSE Type 2 phosphatidylinositol 4,5-bisphosphate 4-phosphatase OS=Mus musculus OX=10090 GN=Pip4p2 PE=1 SV=1	-0.00222146	0.95592	0.136534	0.0099061	0.138756	-0.185584	0.00206782	-0.0468283	0.266725
Transmembrane protein 50B	Tmem50b	YES	sp|Q9D1X9|TM50B_MOUSE Transmembrane protein 50B OS=Mus musculus OX=10090 GN=Tmem50b PE=1 SV=1;tr|D6RH99|D6RH99_MOUSE Transmembrane protein 50B OS=Mus musculus OX=10090 GN=Tmem50b PE=1 SV=1;tr|D6RJK9|D6RJK9_MOUSE Transmembrane protein 50B OS=Mus musculus OX	-0.233988	0.03335	-0.0995472	0.297235	0.134441	0.289517	0.0137675	0.423958	0.00203678
Transmembrane protein 50A	Tmem50a	NO	sp|Q9CXL1|TM50A_MOUSE Transmembrane protein 50A OS=Mus musculus OX=10090 GN=Tmem50a PE=1 SV=1	-0.0140732	0.903533	0.0410098	0.725062	0.055083	-0.275291	0.0439574	-0.220208	0.0904091
Transmembrane protein 43	Tmem43	NO	sp|Q9DBS1|TMM43_MOUSE Transmembrane protein 43 OS=Mus musculus OX=10090 GN=Tmem43 PE=1 SV=1	0.0377613	0.595288	0.028907	0.682944	-0.00885432	0.220893	0.0141887	0.212038	0.0169875
Transmembrane protein 41B	Tmem41b	YES	sp|Q8K1A5|TM41B_MOUSE Transmembrane protein 41B OS=Mus musculus OX=10090 GN=Tmem41b PE=1 SV=1;tr|D6RIR0|D6RIR0_MOUSE Transmembrane protein 41B OS=Mus musculus OX=10090 GN=Tmem41b PE=1 SV=1;tr|D6RFP3|D6RFP3_MOUSE Transmembrane protein 41B OS=Mus musculus OX	0.0322921	0.723033	-0.223089	0.038492	-0.255382	0.565374	0.000365276	0.309993	0.00962332
Transmembrane protein 41A	Tmem41a	NO	sp|Q9D8U2|TM41A_MOUSE Transmembrane protein 41A OS=Mus musculus OX=10090 GN=Tmem41a PE=2 SV=1	-0.0180731	0.778706	-0.0968834	0.161793	-0.0788104	0.297117	0.00203034	0.218307	0.00981152
	Tmem40	NO	tr|E9Q6I9|E9Q6I9_MOUSE Transmembrane protein 40 OS=Mus musculus OX=10090 GN=Tmem40 PE=1 SV=1	-0.244719	0.233266	0.237087	0.246688	0.481807	-1.77708	3.29159e-05	-1.29528	0.000242549
Transmembrane protein 40	Tmem40	NO	tr|E9QN39|E9QN39_MOUSE Transmembrane protein 40 OS=Mus musculus OX=10090 GN=Tmem40 PE=1 SV=1;sp|Q4FJU9|TMM40_MOUSE Transmembrane protein 40 OS=Mus musculus OX=10090 GN=Tmem40 PE=1 SV=1	-0.102944	0.132979	0.146781	0.0460235	0.249725	-0.710173	8.1215e-06	-0.460448	0.000133266
Trimeric intracellular cation channel type B	Tmem38b	YES	sp|Q9DAV9|TM38B_MOUSE Trimeric intracellular cation channel type B OS=Mus musculus OX=10090 GN=Tmem38b PE=1 SV=1	0.229394	0.0116822	0.241306	0.00922538	0.0119119	0.178367	0.0336631	0.190279	0.0261358
Transmembrane protein 33	Tmem33	YES	tr|A0A0R4J1Z3|A0A0R4J1Z3_MOUSE Transmembrane protein 33 OS=Mus musculus OX=10090 GN=Tmem33 PE=1 SV=1;sp|Q9CR67|TMM33_MOUSE Transmembrane protein 33 OS=Mus musculus OX=10090 GN=Tmem33 PE=1 SV=1	0.159695	0.0399131	-0.0210689	0.748857	-0.180764	0.247294	0.00596862	0.0665307	0.328109
Cell cycle control protein 50A	Tmem30a	NO	sp|Q8VEK0|CC50A_MOUSE Cell cycle control protein 50A OS=Mus musculus OX=10090 GN=Tmem30a PE=1 SV=1;tr|D3YVV1|D3YVV1_MOUSE Cell cycle control protein OS=Mus musculus OX=10090 GN=Tmem30a PE=1 SV=1	-0.0619764	0.0946456	-0.0339125	0.32508	0.0280639	0.216651	0.000276495	0.244715	0.000130205
Transmembrane protein 263	Tmem263	NO	sp|Q9DAM7|TM263_MOUSE Transmembrane protein 263 OS=Mus musculus OX=10090 GN=Tmem263 PE=1 SV=1	0.187218	0.0772622	0.48085	0.00113783	0.293632	-0.889597	2.56756e-05	-0.595966	0.000321178
Transmembrane protein 260	Tmem260	YES	tr|A0A2I3BQ91|A0A2I3BQ91_MOUSE Transmembrane protein 260 OS=Mus musculus OX=10090 GN=Tmem260 PE=1 SV=1;sp|Q8BMD6|TM260_MOUSE Transmembrane protein 260 OS=Mus musculus OX=10090 GN=Tmem260 PE=2 SV=2;tr|A0A2I3BQY6|A0A2I3BQY6_MOUSE Transmembrane protein 260 OS	0.0451003	0.723844	-0.174524	0.197926	-0.219624	0.232026	0.100705	0.0124012	0.922261
Membralin	Tmem259	NO	tr|F6RN19|F6RN19_MOUSE Membralin (Fragment) OS=Mus musculus OX=10090 GN=Tmem259 PE=1 SV=1;sp|Q8CIV2|MBRL_MOUSE Membralin OS=Mus musculus OX=10090 GN=Tmem259 PE=1 SV=2	-0.238157	0.247649	-0.258274	0.213741	-0.0201172	-0.0337271	0.863211	-0.0538443	0.783647
Transmembrane protein 256	Tmem256	NO	sp|Q5F285|TM256_MOUSE Transmembrane protein 256 OS=Mus musculus OX=10090 GN=Tmem256 PE=1 SV=1	-0.100427	0.37931	-0.0133952	0.903878	0.0870317	0.252246	0.0508891	0.339277	0.0159221
	Tmem254b	NO	tr|V9GX22|V9GX22_MOUSE Transmembrane protein 254 OS=Mus musculus OX=10090 GN=Tmem254a PE=1 SV=1;sp|P0DN91|T254C_MOUSE Transmembrane protein 254c OS=Mus musculus OX=10090 GN=Tmem254c PE=1 SV=1;sp|P0DN90|T254B_MOUSE Transmembrane protein 254b OS=Mus musculus	-0.112807	0.049284	0.295212	0.000455578	0.40802	0.0311831	0.53176	0.439203	3.82022e-05
Transmembrane protein 251	Tmem251	NO	sp|Q8BH26|TM251_MOUSE Transmembrane protein 251 OS=Mus musculus OX=10090 GN=Tmem251 PE=2 SV=1	-0.0537312	0.677947	0.212319	0.131101	0.26605	-0.141017	0.293274	0.125033	0.347233
Transmembrane protein 246	Tmem246	YES	sp|Q91YV9|TM246_MOUSE Transmembrane protein 246 OS=Mus musculus OX=10090 GN=Tmem246 PE=2 SV=1	-0.194823	0.0243413	0.0414792	0.560747	0.236302	-0.836936	5.89301e-06	-0.600634	5.1546e-05
Transmembrane protein 245	Tmem245	YES	tr|D3YWD3|D3YWD3_MOUSE Transmembrane protein 245 OS=Mus musculus OX=10090 GN=Tmem245 PE=1 SV=1;sp|B1AZA5|TM245_MOUSE Transmembrane protein 245 OS=Mus musculus OX=10090 GN=Tmem245 PE=1 SV=1;tr|B1AZA8|B1AZA8_MOUSE Transmembrane protein 245 (Fragment) OS=Mus	-0.145741	0.288121	-0.331231	0.0350546	-0.18549	0.329762	0.0356474	0.144272	0.292613
Transmembrane protein 230	Tmem230	NO	sp|Q8CIB6|TM230_MOUSE Transmembrane protein 230 OS=Mus musculus OX=10090 GN=Tmem230 PE=1 SV=1	0.00376345	0.953028	0.0408274	0.529081	0.037064	-0.0143015	0.82319	0.0227624	0.722889
Transmembrane protein 222	Tmem222	NO	sp|Q8BVA2|TM222_MOUSE Transmembrane protein 222 OS=Mus musculus OX=10090 GN=Tmem222 PE=1 SV=1	0.00966399	0.834903	-0.0555746	0.253828	-0.0652386	0.089522	0.0855423	0.0242834	0.603647
Transmembrane protein 208	Tmem208	NO	sp|Q9CR96|TM208_MOUSE Transmembrane protein 208 OS=Mus musculus OX=10090 GN=Tmem208 PE=2 SV=1;tr|S4R1H6|S4R1H6_MOUSE Transmembrane protein 208 OS=Mus musculus OX=10090 GN=Tmem208 PE=1 SV=1;tr|D3Z7S5|D3Z7S5_MOUSE Transmembrane protein 208 OS=Mus musculus OX	-0.178848	0.0338021	-0.230061	0.011729	-0.0512127	0.143847	0.0718502	0.0926343	0.214256
Transmembrane protein 205	Tmem205	NO	tr|A0A1L1SSA8|A0A1L1SSA8_MOUSE Transmembrane protein 205 (Fragment) OS=Mus musculus OX=10090 GN=Tmem205 PE=1 SV=1;sp|Q91XE8|TM205_MOUSE Transmembrane protein 205 OS=Mus musculus OX=10090 GN=Tmem205 PE=1 SV=1	-0.108893	0.0423888	-0.110371	0.0403614	-0.00147777	0.210033	0.0020591	0.208555	0.00214024
Transmembrane protein 2	Tmem2	YES	sp|Q5FWI3|TMEM2_MOUSE Cell surface hyaluronidase OS=Mus musculus OX=10090 GN=Tmem2 PE=1 SV=1	0.15137	0.000883558	0.151823	0.000868396	0.000453296	0.222156	8.55948e-05	0.222609	8.4497e-05
Transmembrane protein 19	Tmem19	NO	tr|A0A1W2P7R5|A0A1W2P7R5_MOUSE Transmembrane protein 19 OS=Mus musculus OX=10090 GN=Tmem19 PE=1 SV=1;tr|A0A1W2P7P6|A0A1W2P7P6_MOUSE Transmembrane protein 19 OS=Mus musculus OX=10090 GN=Tmem19 PE=1 SV=1;sp|Q91W52|TMM19_MOUSE Transmembrane protein 19 OS=Mus	-0.182573	0.00548242	-0.120845	0.0341659	0.0617279	0.152464	0.0129772	0.214192	0.00237736
	Tmem181a	NO	tr|Q3U3W2|Q3U3W2_MOUSE Transmembrane protein 181A OS=Mus musculus OX=10090 GN=Tmem181a PE=1 SV=1	-0.0718795	0.196998	0.0321444	0.543764	0.104024	0.068861	0.214237	0.172885	0.0111549
Transmembrane protein 179B	Tmem179b	NO	sp|Q9CY24|T179B_MOUSE Transmembrane protein 179B OS=Mus musculus OX=10090 GN=Tmem179b PE=1 SV=1	-0.133727	0.283262	-0.145347	0.247035	-0.011619	0.255251	0.0623167	0.243632	0.0722866
Transmembrane protein 175	Tmem175	NO	sp|Q9CXY1|TM175_MOUSE Endosomal/lysosomal potassium channel TMEM175 OS=Mus musculus OX=10090 GN=Tmem175 PE=1 SV=2	-0.333633	0.0276512	-0.30774	0.0377224	0.0258928	0.237237	0.0891161	0.263129	0.0649194
Transmembrane protein 169	Tmem169	NO	sp|Q8BG50|TM169_MOUSE Transmembrane protein 169 OS=Mus musculus OX=10090 GN=Tmem169 PE=2 SV=1;tr|D3YUR6|D3YUR6_MOUSE Transmembrane protein 169 (Fragment) OS=Mus musculus OX=10090 GN=Tmem169 PE=1 SV=1	0.163839	0.501288	-0.86393	0.0074305	-1.02777	0.670237	0.0232515	-0.357533	0.166078
Transmembrane protein 168	Tmem168	YES	sp|Q91VX9|TM168_MOUSE Transmembrane protein 168 OS=Mus musculus OX=10090 GN=Tmem168 PE=1 SV=1;tr|A0A0N4SW50|A0A0N4SW50_MOUSE RIKEN cDNA 8430437G11, isoform CRA_b OS=Mus musculus OX=10090 GN=Tmem168 PE=1 SV=1	0.054876	0.288198	0.0311213	0.535195	-0.0237547	0.264888	0.000896355	0.241133	0.00152999
Protein kish;Protein kish-A	Tmem167;Tmem167a	NO	tr|E0CY07|E0CY07_MOUSE Protein kish OS=Mus musculus OX=10090 GN=Tmem167 PE=1 SV=1;sp|Q9CR64|KISHA_MOUSE Protein kish-A OS=Mus musculus OX=10090 GN=Tmem167a PE=1 SV=1	0.0628359	0.458872	-0.121453	0.173846	-0.184288	0.375417	0.00232467	0.191128	0.04893
Transmembrane protein 165	Tmem165	NO	sp|P52875|TM165_MOUSE Transmembrane protein 165 OS=Mus musculus OX=10090 GN=Tmem165 PE=1 SV=2	0.00244665	0.950785	0.0797754	0.0758663	0.0773288	0.268781	0.000218891	0.34611	4.44827e-05
Transmembrane protein 164	Tmem164	NO	sp|Q6PHN7|TM164_MOUSE Transmembrane protein 164 OS=Mus musculus OX=10090 GN=Tmem164 PE=1 SV=1;tr|A2AHA2|A2AHA2_MOUSE Transmembrane protein 164 OS=Mus musculus OX=10090 GN=Tmem164 PE=4 SV=1;tr|A2AH98|A2AH98_MOUSE Transmembrane protein 164 OS=Mus musculus OX	0.214838	0.0134679	0.0370666	0.587723	-0.177772	0.318971	0.00183755	0.141199	0.0675825
Transmembrane protein 163	Tmem163	NO	sp|Q8C996|TM163_MOUSE Transmembrane protein 163 OS=Mus musculus OX=10090 GN=Tmem163 PE=1 SV=1	0.0403318	0.325815	-0.00934195	0.813599	-0.0496738	-0.0258502	0.519915	-0.075524	0.0886737
Transmembrane protein 161A	Tmem161a	NO	tr|S4R2H0|S4R2H0_MOUSE Transmembrane protein 161A (Fragment) OS=Mus musculus OX=10090 GN=Tmem161a PE=1 SV=8;tr|M0QWV0|M0QWV0_MOUSE Transmembrane protein 161A OS=Mus musculus OX=10090 GN=Tmem161a PE=1 SV=1;tr|F6UNW2|F6UNW2_MOUSE Transmembrane protein 161A (	-0.0268566	0.810007	0.0843144	0.458947	0.111171	0.0234004	0.833989	0.134571	0.251402
Transmembrane protein 160	Tmem160	NO	sp|Q9D938|TM160_MOUSE Transmembrane protein 160 OS=Mus musculus OX=10090 GN=Tmem160 PE=2 SV=1;tr|A0A1B0GR84|A0A1B0GR84_MOUSE Transmembrane protein 160 OS=Mus musculus OX=10090 GN=Tmem160 PE=1 SV=1	-0.0096893	0.867389	-0.0161529	0.781139	-0.0064636	0.00974667	0.866613	0.00328306	0.954839
Transmembrane protein 151B	Tmem151b	NO	sp|Q68FE7|T151B_MOUSE Transmembrane protein 151B OS=Mus musculus OX=10090 GN=Tmem151b PE=2 SV=1	-0.222985	0.00193539	-0.0902019	0.0913314	0.132783	0.174849	0.00688417	0.307632	0.00029783
Transmembrane protein 14C	Tmem14c	NO	sp|Q9CQN6|TM14C_MOUSE Transmembrane protein 14C OS=Mus musculus OX=10090 GN=Tmem14c PE=1 SV=1	0.121571	0.296919	-0.178521	0.142141	-0.300092	0.367197	0.0115582	0.0671052	0.553469
Transmembrane protein 147	Tmem147	NO	tr|A0A140LJ56|A0A140LJ56_MOUSE Transmembrane protein 147 OS=Mus musculus OX=10090 GN=Tmem147 PE=1 SV=1;sp|Q9CQG6|TM147_MOUSE Transmembrane protein 147 OS=Mus musculus OX=10090 GN=Tmem147 PE=1 SV=1;tr|A0A140LIQ8|A0A140LIQ8_MOUSE Transmembrane protein 147 OS	0.0654044	0.0447167	-0.0605141	0.0584356	-0.125919	0.337506	5.01921e-06	0.211587	0.0001044
Transmembrane protein 143	Tmem143	NO	tr|A0A1B0GT63|A0A1B0GT63_MOUSE Transmembrane protein 143 OS=Mus musculus OX=10090 GN=Tmem143 PE=1 SV=1;tr|G3X9F4|G3X9F4_MOUSE Transmembrane protein 143 OS=Mus musculus OX=10090 GN=Tmem143 PE=1 SV=1;sp|Q8VD26|TM143_MOUSE Transmembrane protein 143 OS=Mus mus	-0.0721658	0.628544	-0.0888089	0.553412	-0.0166431	0.251933	0.121175	0.23529	0.143491
Transmembrane protein 135	Tmem135	NO	sp|Q9CYV5|TM135_MOUSE Transmembrane protein 135 OS=Mus musculus OX=10090 GN=Tmem135 PE=2 SV=1	-0.0246069	0.709087	-0.252971	0.00534779	-0.228364	0.213692	0.0120439	-0.0146724	0.82336
Transmembrane protein 134	Tmem134	NO	sp|Q8R0J4|TM134_MOUSE Transmembrane protein 134 OS=Mus musculus OX=10090 GN=Tmem134 PE=1 SV=1	-0.171368	0.292976	-0.0297135	0.849236	0.141655	-0.772966	0.00140352	-0.631311	0.00419211
E3 ubiquitin-protein ligase TM129	Tmem129	YES	sp|Q8K304|TM129_MOUSE E3 ubiquitin-protein ligase TM129 OS=Mus musculus OX=10090 GN=Tmem129 PE=2 SV=1	-0.014969	0.883666	-0.139176	0.20149	-0.124207	0.281108	0.0249977	0.156902	0.156121
Transmembrane protein 120B	Tmem120b	NO	tr|E0CYA8|E0CYA8_MOUSE Transmembrane protein 120B OS=Mus musculus OX=10090 GN=Tmem120b PE=1 SV=1;tr|E0CX33|E0CX33_MOUSE Transmembrane protein 120B (Fragment) OS=Mus musculus OX=10090 GN=Tmem120b PE=1 SV=1;sp|Q3TA38|T120B_MOUSE Transmembrane protein 120B OS	0.129697	0.0164404	0.114131	0.0279952	-0.0155653	0.241615	0.000650351	0.22605	0.000958236
Transmembrane protein 120A	Tmem120a	NO	sp|Q8C1E7|T120A_MOUSE Transmembrane protein 120A OS=Mus musculus OX=10090 GN=Tmem120a PE=1 SV=1;tr|D3Z0U3|D3Z0U3_MOUSE Transmembrane protein 120A (Fragment) OS=Mus musculus OX=10090 GN=Tmem120a PE=1 SV=8	0.0162498	0.854613	0.0785038	0.389096	0.0622539	0.292807	0.0112507	0.355061	0.00438724
Transmembrane protein 115	Tmem115	NO	sp|Q9WUH1|TM115_MOUSE Transmembrane protein 115 OS=Mus musculus OX=10090 GN=Tmem115 PE=1 SV=1	0.143914	0.0227367	-0.1915	0.00618739	-0.335414	0.146414	0.0211677	-0.189	0.00660303
Transmembrane protein 11, mitochondrial	Tmem11	NO	sp|Q8BK08|TMM11_MOUSE Transmembrane protein 11, mitochondrial OS=Mus musculus OX=10090 GN=Tmem11 PE=1 SV=1;tr|E9Q933|E9Q933_MOUSE Transmembrane protein 11, mitochondrial OS=Mus musculus OX=10090 GN=Tmem11 PE=1 SV=1;tr|Z4YN74|Z4YN74_MOUSE Transmembrane prot	-0.0568753	0.275289	-0.0522632	0.312832	0.00461208	0.113826	0.0500035	0.118438	0.0434639
Transmembrane protein 109	Tmem109	YES	sp|Q3UBX0|TM109_MOUSE Transmembrane protein 109 OS=Mus musculus OX=10090 GN=Tmem109 PE=1 SV=2;tr|D3Z7P2|D3Z7P2_MOUSE Transmembrane protein 109 (Fragment) OS=Mus musculus OX=10090 GN=Tmem109 PE=1 SV=1;tr|D3Z3Z2|D3Z3Z2_MOUSE Transmembrane protein 109 (Fragme	-0.273875	5.74346e-05	-0.285198	4.42934e-05	-0.0113233	0.331934	1.65363e-05	0.32061	2.0748e-05
Transmembrane protein 106B	Tmem106b	YES	sp|Q80X71|T106B_MOUSE Transmembrane protein 106B OS=Mus musculus OX=10090 GN=Tmem106b PE=1 SV=1;tr|D3Z191|D3Z191_MOUSE Transmembrane protein 106B (Fragment) OS=Mus musculus OX=10090 GN=Tmem106b PE=1 SV=8;tr|D3Z0M2|D3Z0M2_MOUSE Transmembrane protein 106B (F	0.102293	0.095664	-0.164523	0.0175669	-0.266816	0.0810556	0.170861	-0.18576	0.0101752
Transmembrane protein 104	Tmem104	NO	tr|A2A6S1|A2A6S1_MOUSE Transmembrane protein 104 OS=Mus musculus OX=10090 GN=Tmem104 PE=1 SV=1;sp|Q3TB48|TM104_MOUSE Transmembrane protein 104 OS=Mus musculus OX=10090 GN=Tmem104 PE=1 SV=1	-0.244778	0.00529695	-0.28135	0.00255937	-0.0365723	0.300982	0.00176999	0.26441	0.00356098
Transmembrane protein 101	Tmem101	YES	sp|Q91VP7|TM101_MOUSE Transmembrane protein 101 OS=Mus musculus OX=10090 GN=Tmem101 PE=2 SV=1	-0.0968941	0.27959	0.0552708	0.525095	0.152165	0.00627909	0.941554	0.158444	0.0971133
Transmembrane emp24 domain-containing protein 9	Tmed9	NO	sp|Q99KF1|TMED9_MOUSE Transmembrane emp24 domain-containing protein 9 OS=Mus musculus OX=10090 GN=Tmed9 PE=1 SV=2;tr|A0A286YDS5|A0A286YDS5_MOUSE Transmembrane emp24 domain-containing protein 9 OS=Mus musculus OX=10090 GN=Tmed9 PE=1 SV=1	0.0444378	0.180846	-0.00220812	0.943145	-0.046646	0.326389	1.30513e-05	0.279743	3.56669e-05
Protein TMED8	Tmed8	YES	sp|Q3UHI4|TMED8_MOUSE Protein TMED8 OS=Mus musculus OX=10090 GN=Tmed8 PE=2 SV=1	-0.150076	0.0140513	-0.220971	0.00202664	-0.0708945	-0.110148	0.0482485	-0.181043	0.00577363
	Tmed7	YES	tr|D3YZZ5|D3YZZ5_MOUSE Transmembrane p24-trafficking protein 7 OS=Mus musculus OX=10090 GN=Tmed7 PE=1 SV=1;tr|E9Q7G1|E9Q7G1_MOUSE Transmembrane p24-trafficking protein 7 OS=Mus musculus OX=10090 GN=Tmed7 PE=1 SV=1	0.00166454	0.959579	0.00934669	0.776611	0.00768215	0.215048	0.000271218	0.22273	0.000218708
Transmembrane emp24 domain-containing protein 5	Tmed5	YES	sp|Q9CXE7|TMED5_MOUSE Transmembrane emp24 domain-containing protein 5 OS=Mus musculus OX=10090 GN=Tmed5 PE=1 SV=1;tr|E9PXY3|E9PXY3_MOUSE Transmembrane emp24 domain-containing protein 5 OS=Mus musculus OX=10090 GN=Tmed5 PE=1 SV=1	0.075771	0.0850304	0.0789303	0.0751903	0.00315933	0.110647	0.0222377	0.113806	0.0197657
Transmembrane emp24 domain-containing protein 4	Tmed4	YES	sp|Q8R1V4|TMED4_MOUSE Transmembrane emp24 domain-containing protein 4 OS=Mus musculus OX=10090 GN=Tmed4 PE=1 SV=1;tr|Q5SVW9|Q5SVW9_MOUSE Transmembrane emp24 domain-containing protein 4 (Fragment) OS=Mus musculus OX=10090 GN=Tmed4 PE=1 SV=1	0.0404248	0.57122	0.0938209	0.210765	0.053396	0.16616	0.0450131	0.219556	0.0147561
Transmembrane emp24 domain-containing protein 3	Tmed3	NO	sp|Q78IS1|TMED3_MOUSE Transmembrane emp24 domain-containing protein 3 OS=Mus musculus OX=10090 GN=Tmed3 PE=1 SV=1	0.128845	0.0151657	0.0125171	0.76449	-0.116328	0.252845	0.000428143	0.136516	0.011688
Transmembrane emp24 domain-containing protein 2	Tmed2	YES	tr|F6V6T4|F6V6T4_MOUSE Transmembrane emp24 domain-containing protein 2 (Fragment) OS=Mus musculus OX=10090 GN=Tmed2 PE=1 SV=1;sp|Q9R0Q3|TMED2_MOUSE Transmembrane emp24 domain-containing protein 2 OS=Mus musculus OX=10090 GN=Tmed2 PE=1 SV=1;tr|Q8BPI2|Q8BPI2	0.0115299	0.83258	0.117528	0.0607733	0.105998	0.0987219	0.102768	0.20472	0.00606938
Transmembrane emp24 domain-containing protein 10	Tmed10	NO	sp|Q9D1D4|TMEDA_MOUSE Transmembrane emp24 domain-containing protein 10 OS=Mus musculus OX=10090 GN=Tmed10 PE=1 SV=1;tr|A0A1Y7VM54|A0A1Y7VM54_MOUSE Transmembrane emp24 domain-containing protein 10 OS=Mus musculus OX=10090 GN=Tmed10 PE=1 SV=1	0.020986	0.652035	0.106337	0.048813	0.0853514	0.172457	0.00627445	0.257809	0.000704481
Transmembrane emp24 domain-containing protein 1	Tmed1	NO	sp|Q3V009|TMED1_MOUSE Transmembrane emp24 domain-containing protein 1 OS=Mus musculus OX=10090 GN=Tmed1 PE=1 SV=1	0.121786	0.524744	-0.0980512	0.606647	-0.219837	0.202078	0.303587	-0.0177586	0.92497
Transmembrane and coiled-coil domain-containing protein 3	Tmco3	YES	sp|Q8BH01|TMCO3_MOUSE Transmembrane and coiled-coil domain-containing protein 3 OS=Mus musculus OX=10090 GN=Tmco3 PE=2 SV=1	-0.088667	0.217777	-0.088008	0.220847	0.000659011	0.275699	0.00407484	0.276358	0.00402473
Transmembrane and coiled-coil domain-containing protein 1	Tmco1	YES	tr|A0A0A6YVS2|A0A0A6YVS2_MOUSE Calcium load-activated calcium channel (Fragment) OS=Mus musculus OX=10090 GN=Tmco1 PE=1 SV=1;sp|Q921L3|TMCO1_MOUSE Calcium load-activated calcium channel OS=Mus musculus OX=10090 GN=Tmco1 PE=1 SV=1	-0.103564	0.0605592	-0.149637	0.0145802	-0.0460729	0.222483	0.00201045	0.17641	0.00674287
Transmembrane and coiled-coil domains protein 2	Tmcc2	YES	tr|Q3T9T1|Q3T9T1_MOUSE Transmembrane and coiled-coil domains protein 2 OS=Mus musculus OX=10090 GN=Tmcc2 PE=1 SV=1;tr|Q3TZY4|Q3TZY4_MOUSE Transmembrane and coiled-coil domains protein 2 OS=Mus musculus OX=10090 GN=Tmcc2 PE=1 SV=1;sp|Q80W04|TMCC2_MOUSE Tran	0.103609	0.0100031	0.0735306	0.0417508	-0.0300787	-0.0865725	0.0221308	-0.116651	0.00562577
Transmembrane and coiled-coil domains protein 1	Tmcc1	YES	tr|F8WJ98|F8WJ98_MOUSE Transmembrane and coiled-coil domains protein 1 (Fragment) OS=Mus musculus OX=10090 GN=Tmcc1 PE=1 SV=2;sp|Q69ZZ6|TMCC1_MOUSE Transmembrane and coiled-coil domains protein 1 OS=Mus musculus OX=10090 GN=Tmcc1 PE=1 SV=2;tr|A0A0N4SWB9|A0	0.160679	0.00155344	-0.0158011	0.635416	-0.176481	0.0477061	0.17864	-0.128774	0.00506638
Transmembrane channel-like protein;Transmembrane channel-like protein 8	Tmc8	YES	tr|B0QZP7|B0QZP7_MOUSE Transmembrane channel-like protein OS=Mus musculus OX=10090 GN=Tmc8 PE=1 SV=1;sp|Q7TN58|TMC8_MOUSE Transmembrane channel-like protein 8 OS=Mus musculus OX=10090 GN=Tmc8 PE=1 SV=2	0.26473	0.00143789	0.223012	0.00364975	-0.0417182	0.0382569	0.484415	-0.00346131	0.948606
Transmembrane channel-like protein;Transmembrane channel-like protein 6	Tmc6	NO	tr|B1ATB3|B1ATB3_MOUSE Transmembrane channel-like protein OS=Mus musculus OX=10090 GN=Tmc6 PE=1 SV=1;sp|Q7TN60|TMC6_MOUSE Transmembrane channel-like protein 6 OS=Mus musculus OX=10090 GN=Tmc6 PE=1 SV=2;tr|D6RCY1|D6RCY1_MOUSE Transmembrane channel-like prot	0.318201	0.000133466	0.180124	0.0036328	-0.138077	0.17289	0.00449278	0.0348124	0.432696
Protein lifeguard 3	Tmbim1	YES	tr|D3Z0A5|D3Z0A5_MOUSE Protein lifeguard 3 (Fragment) OS=Mus musculus OX=10090 GN=Tmbim1 PE=1 SV=8;tr|D3Z225|D3Z225_MOUSE Protein lifeguard 3 (Fragment) OS=Mus musculus OX=10090 GN=Tmbim1 PE=1 SV=1;tr|Q3U717|Q3U717_MOUSE Protein lifeguard 3 OS=Mus musculus	0.0340213	0.778279	-0.0980533	0.426998	-0.132075	0.396722	0.0114521	0.264647	0.0573259
Translation machinery-associated protein 7	Tma7	NO	sp|Q8K003|TMA7_MOUSE Translation machinery-associated protein 7 OS=Mus musculus OX=10090 GN=Tma7 PE=3 SV=1	0.237838	0.0970106	0.388066	0.0168653	0.150228	-0.792311	0.000390389	-0.642083	0.00133303
Transmembrane 9 superfamily member 4	Tm9sf4	YES	sp|Q8BH24|TM9S4_MOUSE Transmembrane 9 superfamily member 4 OS=Mus musculus OX=10090 GN=Tm9sf4 PE=1 SV=1	-0.00609388	0.861871	-0.0529886	0.160897	-0.0468947	0.22422	0.000309088	0.177326	0.00123001
Transmembrane 9 superfamily member 3	Tm9sf3	YES	sp|Q9ET30|TM9S3_MOUSE Transmembrane 9 superfamily member 3 OS=Mus musculus OX=10090 GN=Tm9sf3 PE=1 SV=1	0.0280625	0.308355	-0.018983	0.481519	-0.0470455	0.104729	0.00468307	0.0576832	0.0588073
Transmembrane 9 superfamily member 2	Tm9sf2	NO	sp|P58021|TM9S2_MOUSE Transmembrane 9 superfamily member 2 OS=Mus musculus OX=10090 GN=Tm9sf2 PE=1 SV=1;tr|E9PZ69|E9PZ69_MOUSE Transmembrane 9 superfamily member OS=Mus musculus OX=10090 GN=Tm9sf2 PE=1 SV=1	-0.0766657	0.0342622	-0.017111	0.57573	0.0595547	0.233865	9.58401e-05	0.29342	2.23305e-05
Transmembrane 9 superfamily member 1	Tm9sf1	NO	tr|D3YWH4|D3YWH4_MOUSE Transmembrane 9 superfamily member (Fragment) OS=Mus musculus OX=10090 GN=Tm9sf1 PE=1 SV=1;tr|D3Z6X7|D3Z6X7_MOUSE Transmembrane 9 superfamily member OS=Mus musculus OX=10090 GN=Tm9sf1 PE=1 SV=1;sp|Q9DBU0|TM9S1_MOUSE Transmembrane 9 s	0.0151292	0.687616	0.0354058	0.3594	0.0202767	0.320695	4.99469e-05	0.340971	3.36509e-05
Transmembrane 7 superfamily member 3	Tm7sf3	YES	tr|A0A0R4J0K4|A0A0R4J0K4_MOUSE Transmembrane 7 superfamily member 3 OS=Mus musculus OX=10090 GN=Tm7sf3 PE=1 SV=1;sp|Q9CRG1|TM7S3_MOUSE Transmembrane 7 superfamily member 3 OS=Mus musculus OX=10090 GN=Tm7sf3 PE=2 SV=2	0.0775025	0.288484	0.251821	0.00747977	0.174318	-0.0640056	0.374375	0.110313	0.146315
Transmembrane 6 superfamily member 1	Tm6sf1	YES	tr|D3YX52|D3YX52_MOUSE Transmembrane 6 superfamily member 1 OS=Mus musculus OX=10090 GN=Tm6sf1 PE=1 SV=1;sp|P58749|TM6S1_MOUSE Transmembrane 6 superfamily member 1 OS=Mus musculus OX=10090 GN=Tm6sf1 PE=2 SV=2	0.299897	0.00754295	0.412694	0.00140626	0.112797	0.0797574	0.354747	0.192554	0.0483134
Toll-like receptor 12	Tlr12	NO	sp|Q6QNU9|TLR12_MOUSE Toll-like receptor 12 OS=Mus musculus OX=10090 GN=Tlr12 PE=1 SV=1	0.22196	0.00770575	-0.0444373	0.481779	-0.266397	0.294183	0.0017776	0.0277856	0.656369
Talin-2	Tln2	YES	tr|E9PUM4|E9PUM4_MOUSE Talin-2 OS=Mus musculus OX=10090 GN=Tln2 PE=1 SV=1;tr|A0A1L1SQ51|A0A1L1SQ51_MOUSE Talin-2 OS=Mus musculus OX=10090 GN=Tln2 PE=1 SV=1;sp|Q71LX4|TLN2_MOUSE Talin-2 OS=Mus musculus OX=10090 GN=Tln2 PE=1 SV=3;tr|Q8CDM9|Q8CDM9_MOUSE Talin	0.0626903	0.238192	-0.0377831	0.462302	-0.100473	0.430299	5.10187e-05	0.329825	0.000270297
Talin-1	Tln1	NO	sp|P26039|TLN1_MOUSE Talin-1 OS=Mus musculus OX=10090 GN=Tln1 PE=1 SV=2	0.00707058	0.810285	-0.0075442	0.797904	-0.0146148	0.0187977	0.528752	0.00418294	0.886905
Serine/threonine-protein kinase tousled-like 1	Tlk1	NO	sp|Q8C0V0|TLK1_MOUSE Serine/threonine-protein kinase tousled-like 1 OS=Mus musculus OX=10090 GN=Tlk1 PE=1 SV=2	-0.226249	0.000149694	-0.147459	0.00187878	0.0787897	-0.163563	0.00104864	-0.0847731	0.0268505
TLD domain-containing protein 1	Tldc1	NO	sp|Q8K0P3|TLDC1_MOUSE TLD domain-containing protein 1 OS=Mus musculus OX=10090 GN=Tldc1 PE=2 SV=1	-0.0704248	0.182706	-0.144189	0.0193604	-0.0737638	-0.0951381	0.0860676	-0.168902	0.00952432
Transketolase	Tkt	YES	sp|P40142|TKT_MOUSE Transketolase OS=Mus musculus OX=10090 GN=Tkt PE=1 SV=1;tr|A0A286YE28|A0A286YE28_MOUSE Transketolase (Fragment) OS=Mus musculus OX=10090 GN=Tkt PE=1 SV=1	0.129846	0.00472431	0.134296	0.00397163	0.00445051	0.0517818	0.146913	0.0562323	0.119888
Thymidine kinase 2, mitochondrial	Tk2	NO	tr|Q8BN51|Q8BN51_MOUSE Thymidine kinase 2, mitochondrial OS=Mus musculus OX=10090 GN=Tk2 PE=1 SV=1;sp|Q9R088|KITM_MOUSE Thymidine kinase 2, mitochondrial OS=Mus musculus OX=10090 GN=Tk2 PE=1 SV=2	-0.370022	0.171616	0.0722863	0.774506	0.442308	-0.315994	0.2345	0.126314	0.618886
Tight junction protein ZO-2	Tjp2	NO	sp|Q9Z0U1|ZO2_MOUSE Tight junction protein ZO-2 OS=Mus musculus OX=10090 GN=Tjp2 PE=1 SV=2	0.0591433	0.273165	0.111461	0.0602633	0.052318	-0.309267	0.000458054	-0.256949	0.00134619
Tight junction protein ZO-1	Tjp1	YES	tr|B9EHJ3|B9EHJ3_MOUSE Tight junction protein ZO-1 OS=Mus musculus OX=10090 GN=Tjp1 PE=1 SV=1;sp|P39447|ZO1_MOUSE Tight junction protein ZO-1 OS=Mus musculus OX=10090 GN=Tjp1 PE=1 SV=2;tr|A0A0U1RPW2|A0A0U1RPW2_MOUSE Tight junction protein ZO-1 OS=Mus muscu	0.236712	0.00459617	0.211017	0.0081345	-0.0256952	-0.258845	0.00287933	-0.28454	0.00171927
TIP41-like protein	Tiprl	YES	sp|Q8BH58|TIPRL_MOUSE TIP41-like protein OS=Mus musculus OX=10090 GN=Tiprl PE=1 SV=1	0.231719	0.137888	0.208978	0.174608	-0.0227414	0.0379487	0.791547	0.0152073	0.915461
Metalloproteinase inhibitor 3	Timp3	YES	sp|P39876|TIMP3_MOUSE Metalloproteinase inhibitor 3 OS=Mus musculus OX=10090 GN=Timp3 PE=1 SV=1	0.207506	0.519769	0.594389	0.0937601	0.386882	-1.00074	0.0139264	-0.613854	0.0854095
Metalloproteinase inhibitor 2	Timp2	YES	tr|Q6PI17|Q6PI17_MOUSE Metalloproteinase inhibitor 2 OS=Mus musculus OX=10090 GN=Timp2 PE=1 SV=1;sp|P25785|TIMP2_MOUSE Metalloproteinase inhibitor 2 OS=Mus musculus OX=10090 GN=Timp2 PE=1 SV=2;tr|B1AQJ3|B1AQJ3_MOUSE Metalloproteinase inhibitor 2 (Fragment)	-0.287604	0.00322277	0.0390969	0.56804	0.326701	-1.42347	1.25055e-07	-1.09677	7.35147e-07
Complex I assembly factor TIMMDC1, mitochondrial	Timmdc1	NO	sp|Q8BUY5|TIDC1_MOUSE Complex I assembly factor TIMMDC1, mitochondrial OS=Mus musculus OX=10090 GN=Timmdc1 PE=1 SV=1	-0.113259	0.0378549	-0.0702881	0.156414	0.0429706	0.161072	0.00843642	0.204043	0.00252317
Mitochondrial import inner membrane translocase subunit Tim9	Timm9	NO	sp|Q9WV98|TIM9_MOUSE Mitochondrial import inner membrane translocase subunit Tim9 OS=Mus musculus OX=10090 GN=Timm9 PE=1 SV=1;tr|A0A1Y7VIZ6|A0A1Y7VIZ6_MOUSE Mitochondrial import inner membrane translocase subunit Tim9 OS=Mus musculus OX=10090 GN=Timm9 PE=1	-0.0851055	0.287349	-0.0709211	0.369164	0.0141844	0.073747	0.351553	0.0879315	0.272966
Mitochondrial import inner membrane translocase subunit Tim8 B	Timm8b	YES	sp|P62077|TIM8B_MOUSE Mitochondrial import inner membrane translocase subunit Tim8 B OS=Mus musculus OX=10090 GN=Timm8b PE=1 SV=1	-0.0566021	0.731309	-0.0566658	0.731021	-6.36881e-05	-0.166323	0.328701	-0.166386	0.328529
Mitochondrial import inner membrane translocase subunit Tim8 A	Timm8a1	NO	sp|Q9WVA2|TIM8A_MOUSE Mitochondrial import inner membrane translocase subunit Tim8 A OS=Mus musculus OX=10090 GN=Timm8a1 PE=1 SV=1	-0.171247	0.0770359	0.0588447	0.49895	0.230092	-0.317882	0.00641947	-0.0877905	0.322928
Mitochondrial import inner membrane translocase subunit TIM50	Timm50	NO	sp|Q9D880|TIM50_MOUSE Mitochondrial import inner membrane translocase subunit TIM50 OS=Mus musculus OX=10090 GN=Timm50 PE=1 SV=1	-0.123761	0.0257247	-0.0486991	0.302544	0.075062	0.0785583	0.115958	0.15362	0.0100184
Mitochondrial import inner membrane translocase subunit TIM44	Timm44	NO	sp|O35857|TIM44_MOUSE Mitochondrial import inner membrane translocase subunit TIM44 OS=Mus musculus OX=10090 GN=Timm44 PE=1 SV=2	-0.0961018	0.0369678	-0.0234966	0.548687	0.0726052	0.121048	0.0143606	0.193653	0.00131147
Mitochondrial import inner membrane translocase subunit Tim23	Timm23	NO	tr|A0A2I3BS49|A0A2I3BS49_MOUSE Mitochondrial import inner membrane translocase subunit Tim23 OS=Mus musculus OX=10090 GN=Timm23 PE=1 SV=1;tr|Q9CXU4|Q9CXU4_MOUSE Mitochondrial import inner membrane translocase subunit TIM23 OS=Mus musculus OX=10090 GN=Gm102	-0.181072	0.00688283	0.0809972	0.133535	0.262069	0.0449718	0.377111	0.307041	0.000372332
Mitochondrial import inner membrane translocase subunit Tim17-B	Timm17b	YES	sp|Q9Z0V7|TI17B_MOUSE Mitochondrial import inner membrane translocase subunit Tim17-B OS=Mus musculus OX=10090 GN=Timm17b PE=1 SV=1;tr|A2AES1|A2AES1_MOUSE Mitochondrial import inner membrane translocase subunit Tim17-B (Fragment) OS=Mus musculus OX=10090 G	-0.0377555	0.409079	0.0908782	0.0727675	0.128634	0.0728151	0.13453	0.201449	0.00231866
Mitochondrial import inner membrane translocase subunit Tim13	Timm13	NO	sp|P62075|TIM13_MOUSE Mitochondrial import inner membrane translocase subunit Tim13 OS=Mus musculus OX=10090 GN=Timm13 PE=1 SV=1;tr|A0A1W2P7H2|A0A1W2P7H2_MOUSE Mitochondrial import inner membrane translocase subunit Tim13 OS=Mus musculus OX=10090 GN=Timm13	-0.0291623	0.660509	-0.0585863	0.387798	-0.029424	0.313345	0.00176185	0.283921	0.00301076
Mitochondrial import inner membrane translocase subunit Tim10 B	Timm10b	NO	sp|Q9WV96|T10B_MOUSE Mitochondrial import inner membrane translocase subunit Tim10 B OS=Mus musculus OX=10090 GN=Timm10b PE=1 SV=1;tr|D3YVK5|D3YVK5_MOUSE Predicted gene 45799 OS=Mus musculus OX=10090 GN=Gm45799 PE=1 SV=1;tr|A0A1B0GSU2|A0A1B0GSU2_MOUSE Mito	-0.166345	0.0613217	-0.0176144	0.820045	0.14873	0.138029	0.107051	0.286759	0.00647757
Mitochondrial import inner membrane translocase subunit Tim10	Timm10	NO	sp|P62073|TIM10_MOUSE Mitochondrial import inner membrane translocase subunit Tim10 OS=Mus musculus OX=10090 GN=Timm10 PE=1 SV=1	-0.124596	0.163158	-0.164096	0.0794438	-0.0394997	-0.160856	0.0843202	-0.200356	0.0408624
TIR domain-containing adapter molecule 1	Ticam1	NO	sp|Q80UF7|TCAM1_MOUSE TIR domain-containing adapter molecule 1 OS=Mus musculus OX=10090 GN=Ticam1 PE=1 SV=1	-0.00851524	0.928026	-0.123158	0.218096	-0.114643	0.191561	0.0735975	0.0769179	0.425794
Nucleolysin TIAR	Tial1	YES	tr|Q921W2|Q921W2_MOUSE Nucleolysin TIAR OS=Mus musculus OX=10090 GN=Tial1 PE=1 SV=1;sp|P70318|TIAR_MOUSE Nucleolysin TIAR OS=Mus musculus OX=10090 GN=Tial1 PE=1 SV=1;tr|D3Z3Y4|D3Z3Y4_MOUSE Nucleolysin TIAR OS=Mus musculus OX=10090 GN=Tial1 PE=1 SV=2;tr|A0A	-0.00568213	0.945002	-0.0378255	0.648643	-0.0321433	-0.107736	0.217673	-0.13988	0.12221
Nucleolysin TIA-1	Tia1	YES	tr|D3Z4H6|D3Z4H6_MOUSE Nucleolysin TIA-1 OS=Mus musculus OX=10090 GN=Tia1 PE=1 SV=1;sp|P52912|TIA1_MOUSE Nucleolysin TIA-1 OS=Mus musculus OX=10090 GN=Tia1 PE=1 SV=1;tr|D3YY02|D3YY02_MOUSE Nucleolysin TIA-1 OS=Mus musculus OX=10090 GN=Tia1 PE=1 SV=1;tr|Q8C	0.117635	0.0268963	0.200422	0.00211045	0.0827873	-0.051842	0.257583	0.0309453	0.485677
THUMP domain-containing protein 3	Thumpd3	NO	sp|P97770|THUM3_MOUSE THUMP domain-containing protein 3 OS=Mus musculus OX=10090 GN=Thumpd3 PE=1 SV=1	0.0138085	0.611927	0.0418046	0.152401	0.0279961	-0.111201	0.00377839	-0.0832047	0.0153203
Thiamine-triphosphatase	Thtpa	NO	sp|Q8JZL3|THTPA_MOUSE Thiamine-triphosphatase OS=Mus musculus OX=10090 GN=Thtpa PE=1 SV=3	-0.0337757	0.419553	-0.0240957	0.559976	0.00968001	0.0457676	0.283456	0.0554476	0.202256
Thrombospondin type-1 domain-containing protein 4	Thsd4	NO	sp|Q3UTY6|THSD4_MOUSE Thrombospondin type-1 domain-containing protein 4 OS=Mus musculus OX=10090 GN=Thsd4 PE=1 SV=2	-0.1579	0.0193092	0.555586	1.52385e-05	0.713486	-0.845245	9.29004e-07	-0.131759	0.0395545
Thimet oligopeptidase	Thop1	NO	tr|A0A0R4IZY0|A0A0R4IZY0_MOUSE Thimet oligopeptidase OS=Mus musculus OX=10090 GN=Thop1 PE=1 SV=1;sp|Q8C1A5|THOP1_MOUSE Thimet oligopeptidase OS=Mus musculus OX=10090 GN=Thop1 PE=1 SV=1	-0.0765878	0.0679315	-0.0661039	0.104853	0.010484	0.0255822	0.493927	0.0360662	0.342967
THO complex subunit 3	Thoc3	NO	sp|Q8VE80|THOC3_MOUSE THO complex subunit 3 OS=Mus musculus OX=10090 GN=Thoc3 PE=2 SV=1	-0.04077	0.796691	-0.0982132	0.539712	-0.0574432	0.0267835	0.865408	-0.0306596	0.84621
Threonine synthase-like 1	Thnsl1	YES	sp|Q8BH55|THNS1_MOUSE Threonine synthase-like 1 OS=Mus musculus OX=10090 GN=Thnsl1 PE=1 SV=1	-0.0649193	0.388132	-0.0234456	0.749315	0.0414737	0.0692071	0.359361	0.110681	0.160964
Probable tRNA(His) guanylyltransferase;tRNA(His) guanylyltransferase	Thg1l	NO	sp|Q9CY52|THG1_MOUSE Probable tRNA(His) guanylyltransferase OS=Mus musculus OX=10090 GN=Thg1l PE=1 SV=1;tr|Q9CQT0|Q9CQT0_MOUSE tRNA(His) guanylyltransferase OS=Mus musculus OX=10090 GN=Thg1l PE=1 SV=1	0.105763	0.0414758	0.0747274	0.121337	-0.0310356	-0.0194258	0.660301	-0.0504614	0.272442
Protein THEMIS2	Themis2	NO	sp|Q91YX0|THMS2_MOUSE Protein THEMIS2 OS=Mus musculus OX=10090 GN=Themis2 PE=1 SV=2	0.0935306	0.514486	0.199369	0.187063	0.105838	0.165481	0.264091	0.271319	0.0870717
Protein THEM6	Them6	YES	sp|Q80ZW2|THEM6_MOUSE Protein THEM6 OS=Mus musculus OX=10090 GN=Them6 PE=1 SV=1	-0.0471115	0.616724	0.0327351	0.726718	0.0798466	0.0924059	0.338762	0.172253	0.0975159
Thrombospondin-2	Thbs2	YES	sp|Q03350|TSP2_MOUSE Thrombospondin-2 OS=Mus musculus OX=10090 GN=Thbs2 PE=1 SV=2	0.238172	0.000763384	0.168213	0.00512017	-0.0699592	-1.95513	6.59063e-10	-2.02509	5.17287e-10
Thrombospondin-1	Thbs1	YES	sp|P35441|TSP1_MOUSE Thrombospondin-1 OS=Mus musculus OX=10090 GN=Thbs1 PE=1 SV=1	0.368324	0.0506527	0.245328	0.160206	-0.122996	-0.79941	0.00141437	-0.922407	0.000619935
	Thbs1	YES	tr|Q80YQ1|Q80YQ1_MOUSE Thrombospondin-1 OS=Mus musculus OX=10090 GN=Thbs1 PE=1 SV=1	0.091559	0.211081	0.0432093	0.53641	-0.0483497	-2.2861	5.51903e-09	-2.33445	4.77957e-09
Thrombomodulin	Thbd	NO	sp|P15306|TRBM_MOUSE Thrombomodulin OS=Mus musculus OX=10090 GN=Thbd PE=1 SV=1	0.260631	0.00076557	0.261265	0.000754802	0.000633757	0.206005	0.0028566	0.206639	0.00281006
Thyroid adenoma-associated protein homolog	Thada	NO	sp|A8C756|THADA_MOUSE Thyroid adenoma-associated protein homolog OS=Mus musculus OX=10090 GN=Thada PE=1 SV=1	0.0906558	0.110965	-0.0453552	0.391433	-0.136011	-0.0277272	0.593911	-0.163738	0.0133687
	Tha1	NO	tr|Q6XPS7|Q6XPS7_MOUSE L-threonine aldolase OS=Mus musculus OX=10090 GN=Tha1 PE=1 SV=1	-0.0555168	0.448278	0.0561445	0.443386	0.111661	0.0371547	0.607498	0.148816	0.0686584
	Tgtp1	NO	sp|Q62293|TGTP1_MOUSE T-cell-specific guanine nucleotide triphosphate-binding protein 1 OS=Mus musculus OX=10090 GN=Tgtp1 PE=1 SV=1;sp|Q3T9E4|TGTP2_MOUSE T-cell-specific guanine nucleotide triphosphate-binding protein 2 OS=Mus musculus OX=10090 GN=Tgtp2 PE	-0.0315057	0.626736	-0.0962552	0.164586	-0.0647495	0.0744945	0.268563	0.00974501	0.879449
Trimethylguanosine synthase	Tgs1	YES	sp|Q923W1|TGS1_MOUSE Trimethylguanosine synthase OS=Mus musculus OX=10090 GN=Tgs1 PE=1 SV=2	0.378205	0.000631744	0.196969	0.0183411	-0.181236	-0.267481	0.00431085	-0.448717	0.000225611
Protein-glutamine gamma-glutamyltransferase 2	Tgm2	NO	sp|P21981|TGM2_MOUSE Protein-glutamine gamma-glutamyltransferase 2 OS=Mus musculus OX=10090 GN=Tgm2 PE=1 SV=4	0.355059	6.79064e-05	0.368114	5.3921e-05	0.0130551	-0.270447	0.000368462	-0.257392	0.00049569
Protein-glutamine gamma-glutamyltransferase K	Tgm1	NO	tr|A0A0R4J293|A0A0R4J293_MOUSE Protein-glutamine gamma-glutamyltransferase K OS=Mus musculus OX=10090 GN=Tgm1 PE=1 SV=1;sp|Q9JLF6|TGM1_MOUSE Protein-glutamine gamma-glutamyltransferase K OS=Mus musculus OX=10090 GN=Tgm1 PE=1 SV=2	-0.137657	0.548525	0.805089	0.00795425	0.942745	0.28205	0.237811	1.2248	0.000843919
Receptor protein serine/threonine kinase;TGF-beta receptor type-1;Activin receptor type-1C;Activin receptor type-1B	Tgfbr1;Acvr1c;Acvr1b	YES	tr|Q9D5H8|Q9D5H8_MOUSE Receptor protein serine/threonine kinase OS=Mus musculus OX=10090 GN=Tgfbr1 PE=1 SV=1;tr|E9Q418|E9Q418_MOUSE Receptor protein serine/threonine kinase OS=Mus musculus OX=10090 GN=Tgfbr1 PE=1 SV=1;sp|Q64729|TGFR1_MOUSE TGF-beta recepto	0.132969	0.0812386	0.15212	0.0527876	0.0191509	0.187866	0.023914	0.207017	0.0158493
Transforming growth factor beta-1-induced transcript 1 protein	Tgfb1i1	NO	sp|Q62219|TGFI1_MOUSE Transforming growth factor beta-1-induced transcript 1 protein OS=Mus musculus OX=10090 GN=Tgfb1i1 PE=1 SV=2;tr|E9Q1D5|E9Q1D5_MOUSE Transforming growth factor beta-1-induced transcript 1 protein OS=Mus musculus OX=10090 GN=Tgfb1i1 PE=	0.129808	0.119145	0.345046	0.0022174	0.215238	-0.492608	0.000281236	-0.27737	0.00688311
Transforming growth factor beta-1;Latency-associated peptide	Tgfb1	NO	sp|P04202|TGFB1_MOUSE Transforming growth factor beta-1 OS=Mus musculus OX=10090 GN=Tgfb1 PE=1 SV=1	-0.15523	0.00274682	0.157852	0.00251008	0.313083	-0.825513	6.23865e-08	-0.51243	1.58889e-06
Transferrin receptor protein 1	Tfrc	NO	sp|Q62351|TFR1_MOUSE Transferrin receptor protein 1 OS=Mus musculus OX=10090 GN=Tfrc PE=1 SV=1;tr|Q8C872|Q8C872_MOUSE Transferrin receptor protein 1 OS=Mus musculus OX=10090 GN=Tfrc PE=1 SV=1	-0.10432	0.630728	-0.138299	0.526666	-0.0339791	0.217736	0.329288	0.183757	0.405561
Tissue factor pathway inhibitor	Tfpi	YES	tr|A2ARA0|A2ARA0_MOUSE Tissue factor pathway inhibitor OS=Mus musculus OX=10090 GN=Tfpi PE=1 SV=1;sp|O54819|TFPI1_MOUSE Tissue factor pathway inhibitor OS=Mus musculus OX=10090 GN=Tfpi PE=2 SV=1;tr|Q8BSB7|Q8BSB7_MOUSE Tissue factor pathway inhibitor OS=Mus	-0.156523	0.0172484	0.210435	0.00421767	0.366958	-1.36179	2.84336e-08	-0.994836	2.42685e-07
	Tfg	NO	tr|Q9Z1A1|Q9Z1A1_MOUSE TFG protein OS=Mus musculus OX=10090 GN=Tfg PE=1 SV=1;tr|B8JJG7|B8JJG7_MOUSE Trk-fused gene (Fragment) OS=Mus musculus OX=10090 GN=Tfg PE=1 SV=1;tr|B8JJG8|B8JJG8_MOUSE Trk-fused gene (Fragment) OS=Mus musculus OX=10090 GN=Tfg PE=1 SV	0.0189874	0.503654	-0.0828145	0.0181985	-0.101802	0.0561096	0.0761115	-0.0456923	0.133986
Alpha-globin transcription factor CP2	Tfcp2	YES	tr|A0A2R8VKI7|A0A2R8VKI7_MOUSE Alpha-globin transcription factor CP2 OS=Mus musculus OX=10090 GN=Tfcp2 PE=1 SV=1;sp|Q9ERA0|TFCP2_MOUSE Alpha-globin transcription factor CP2 OS=Mus musculus OX=10090 GN=Tfcp2 PE=1 SV=1	0.090509	0.226343	-0.00486257	0.94514	-0.0953716	0.0238478	0.736815	-0.0715238	0.329265
Dimethyladenosine transferase 1, mitochondrial	Tfb1m	NO	sp|Q8JZM0|TFB1M_MOUSE Dimethyladenosine transferase 1, mitochondrial OS=Mus musculus OX=10090 GN=Tfb1m PE=1 SV=1	-0.136316	0.00989933	0.181635	0.00230333	0.317951	0.091298	0.050847	0.409249	1.62016e-05
Transcription factor A, mitochondrial	Tfam	NO	tr|A0A0R4J1N9|A0A0R4J1N9_MOUSE Transcription factor A, mitochondrial OS=Mus musculus OX=10090 GN=Tfam PE=1 SV=1;sp|P40630|TFAM_MOUSE Transcription factor A, mitochondrial OS=Mus musculus OX=10090 GN=Tfam PE=1 SV=2;tr|D3Z0F3|D3Z0F3_MOUSE Transcription facto	-0.0526656	0.21971	0.000135347	0.997331	0.052801	-0.00738628	0.85532	0.0454147	0.28314
Serotransferrin	Tf	NO	sp|Q921I1|TRFE_MOUSE Serotransferrin OS=Mus musculus OX=10090 GN=Tf PE=1 SV=1	-0.0334242	0.801787	0.243676	0.0994767	0.2771	-0.29694	0.0540553	-0.0198401	0.881361
Testis-expressed sequence 29 protein	Tex29	NO	tr|A0A1B0GSW0|A0A1B0GSW0_MOUSE RIKEN cDNA 1700018L24, isoform CRA_b OS=Mus musculus OX=10090 GN=Tex29 PE=4 SV=1;tr|A0A1B0GSD5|A0A1B0GSD5_MOUSE Testis-expressed protein 29 OS=Mus musculus OX=10090 GN=Tex29 PE=4 SV=1;sp|Q9DA77|TEX29_MOUSE Testis-expressed pr	0.205824	0.142517	0.397037	0.0155059	0.191213	-0.465756	0.00739557	-0.274543	0.0635583
	Tex264	NO	tr|E9Q137|E9Q137_MOUSE Testis-expressed gene 264 OS=Mus musculus OX=10090 GN=Tex264 PE=1 SV=1	-0.10762	0.0289906	-0.121171	0.0177819	-0.0135509	0.10178	0.0359304	0.0882288	0.0594954
Testis-expressed sequence 2 protein	Tex2	YES	sp|Q6ZPJ0|TEX2_MOUSE Testis-expressed protein 2 OS=Mus musculus OX=10090 GN=Tex2 PE=1 SV=2;tr|B1ATR2|B1ATR2_MOUSE Testis-expressed protein 2 OS=Mus musculus OX=10090 GN=Tex2 PE=1 SV=1;tr|A0A140LHL8|A0A140LHL8_MOUSE Testis-expressed protein 2 (Fragment) OS=	-0.0989086	0.0704002	0.0172535	0.720415	0.116162	-0.0949737	0.0797648	0.0211884	0.661065
Calcineurin B homologous protein 3	Tesc	YES	sp|Q9JKL5|CHP3_MOUSE Calcineurin B homologous protein 3 OS=Mus musculus OX=10090 GN=Tesc PE=1 SV=2;tr|D0EM46|D0EM46_MOUSE Calcineurin B homologous protein 3 OS=Mus musculus OX=10090 GN=Tesc PE=1 SV=1	0.107799	0.0140347	0.066416	0.0847406	-0.0413834	0.139193	0.00407849	0.0978096	0.0213666
Testin	Tes	YES	tr|Q3ULB1|Q3ULB1_MOUSE Testin OS=Mus musculus OX=10090 GN=Tes PE=1 SV=1;tr|Q921W7|Q921W7_MOUSE Testin OS=Mus musculus OX=10090 GN=Tes PE=1 SV=2;sp|P47226|TES_MOUSE Testin OS=Mus musculus OX=10090 GN=Tes PE=1 SV=1	0.272741	1.07349e-05	0.326451	3.25423e-06	0.0537098	-0.304466	5.18009e-06	-0.250756	1.86376e-05
Teneurin-4	Tenm4	NO	sp|Q3UHK6|TEN4_MOUSE Teneurin-4 OS=Mus musculus OX=10090 GN=Tenm4 PE=1 SV=2	-0.0357425	0.782924	-0.166199	0.225117	-0.130456	0.724258	0.000692885	0.593802	0.00213722
Telomere length regulation protein TEL2 homolog	Telo2	NO	sp|Q9DC40|TELO2_MOUSE Telomere length regulation protein TEL2 homolog OS=Mus musculus OX=10090 GN=Telo2 PE=1 SV=2	0.0129301	0.825674	0.0543827	0.368421	0.0414526	-0.0592276	0.329958	-0.017775	0.762435
Tektin-1	Tekt1	NO	sp|Q9DAJ2|TEKT1_MOUSE Tektin-1 OS=Mus musculus OX=10090 GN=Tekt1 PE=1 SV=1	-0.0894288	0.622726	0.0774456	0.669345	0.166874	-0.737148	0.00393887	-0.570274	0.0136852
Receptor protein-tyrosine kinase;Angiopoietin-1 receptor	Tek	NO	tr|Q80YS4|Q80YS4_MOUSE Angiopoietin-1 receptor OS=Mus musculus OX=10090 GN=Tek PE=1 SV=1;tr|B1AWS8|B1AWS8_MOUSE Angiopoietin-1 receptor OS=Mus musculus OX=10090 GN=Tek PE=1 SV=1;sp|Q02858|TIE2_MOUSE Angiopoietin-1 receptor OS=Mus musculus OX=10090 GN=Tek P	0.260805	0.00215234	0.32808	0.000582117	0.0672752	-0.166473	0.019318	-0.0991982	0.114143
Transcription elongation factor, mitochondrial	Tefm	NO	sp|Q5SSK3|TEFM_MOUSE Transcription elongation factor, mitochondrial OS=Mus musculus OX=10090 GN=Tefm PE=1 SV=1	-0.254657	0.491513	-0.279051	0.452571	-0.0243936	0.7433	0.0722435	0.718906	0.080015
Very-long-chain enoyl-CoA reductase	Tecr	NO	sp|Q9CY27|TECR_MOUSE Very-long-chain enoyl-CoA reductase OS=Mus musculus OX=10090 GN=Tecr PE=1 SV=1;tr|G3UWE1|G3UWE1_MOUSE MCG11048, isoform CRA_c OS=Mus musculus OX=10090 GN=Tecr PE=1 SV=1;tr|Q52L67|Q52L67_MOUSE Gpsn2 protein OS=Mus musculus OX=10090 GN=T	-0.116493	0.00676644	-0.0145243	0.649145	0.101968	-0.237232	0.000117976	-0.135263	0.00315259
	Tecpr2	YES	tr|Q3UH45|Q3UH45_MOUSE Tectonin beta-propeller repeat-containing 2 OS=Mus musculus OX=10090 GN=Tecpr2 PE=1 SV=1	-0.116378	0.0102983	-0.100337	0.0199225	0.016041	-0.0341107	0.340389	-0.0180697	0.604589
Tectonin beta-propeller repeat-containing protein 1	Tecpr1	NO	sp|Q80VP0|TCPR1_MOUSE Tectonin beta-propeller repeat-containing protein 1 OS=Mus musculus OX=10090 GN=Tecpr1 PE=1 SV=1	0.477812	0.157216	-0.0437626	0.888618	-0.521575	0.407431	0.218721	-0.114144	0.716072
Non-specific protein-tyrosine kinase;Tyrosine-protein kinase Tec	Tec	NO	tr|Q3U436|Q3U436_MOUSE Tyrosine-protein kinase OS=Mus musculus OX=10090 GN=Tec PE=1 SV=1;sp|P24604|TEC_MOUSE Tyrosine-protein kinase Tec OS=Mus musculus OX=10090 GN=Tec PE=1 SV=2;tr|Q8CFK4|Q8CFK4_MOUSE Tyrosine-protein kinase OS=Mus musculus OX=10090 GN=Te	-0.00983291	0.790015	-0.0602051	0.134479	-0.0503722	-0.0793132	0.0612103	-0.129685	0.00835668
Tudor and KH domain-containing protein	Tdrkh	NO	tr|A0A0G2JFB2|A0A0G2JFB2_MOUSE Tudor and KH domain-containing protein OS=Mus musculus OX=10090 GN=Tdrkh PE=1 SV=1;sp|Q80VL1|TDRKH_MOUSE Tudor and KH domain-containing protein OS=Mus musculus OX=10090 GN=Tdrkh PE=1 SV=1;tr|A0A0G2JFE0|A0A0G2JFE0_MOUSE Tudor	-0.114119	0.170854	0.00420718	0.956664	0.118326	-0.26448	0.00965328	-0.146154	0.0917349
Tudor domain-containing protein 7	Tdrd7	NO	tr|A0A0A0MQD1|A0A0A0MQD1_MOUSE Tudor domain-containing protein 7 OS=Mus musculus OX=10090 GN=Tdrd7 PE=1 SV=1;sp|Q8K1H1|TDRD7_MOUSE Tudor domain-containing protein 7 OS=Mus musculus OX=10090 GN=Tdrd7 PE=1 SV=1	0.147891	0.00132682	0.00773526	0.794157	-0.140155	0.019923	0.507675	-0.120232	0.00407759
Tudor domain-containing protein 3	Tdrd3	YES	sp|Q91W18|TDRD3_MOUSE Tudor domain-containing protein 3 OS=Mus musculus OX=10090 GN=Tdrd3 PE=1 SV=4	0.0065444	0.858658	0.122382	0.0108163	0.115838	-0.402168	1.01329e-05	-0.28633	9.1332e-05
T-complex protein 11-like protein 1	Tcp11l1	YES	sp|Q8BTG3|T11L1_MOUSE T-complex protein 11-like protein 1 OS=Mus musculus OX=10090 GN=Tcp11l1 PE=1 SV=1	-0.294923	0.000146131	-0.240214	0.000510816	0.0547086	-0.126034	0.0151915	-0.0713253	0.112976
T-complex protein 1 subunit alpha	Tcp1	NO	sp|P11983|TCPA_MOUSE T-complex protein 1 subunit alpha OS=Mus musculus OX=10090 GN=Tcp1 PE=1 SV=3	0.0277156	0.316773	-0.109507	0.0038442	-0.137222	0.0276166	0.31838	-0.109606	0.00382614
Transcobalamin-2	Tcn2	NO	sp|O88968|TCO2_MOUSE Transcobalamin-2 OS=Mus musculus OX=10090 GN=Tcn2 PE=1 SV=1	-0.0218955	0.777292	0.025419	0.742898	0.0473145	-2.10657	2.11439e-08	-2.05926	2.47065e-08
V-type proton ATPase subunit a	Tcirg1	NO	tr|Q9JHF5|Q9JHF5_MOUSE V-type proton ATPase subunit a OS=Mus musculus OX=10090 GN=Tcirg1 PE=1 SV=1	-0.15717	0.145133	-0.297096	0.0175142	-0.139926	0.154873	0.150234	0.0149477	0.88036
Transcription factor 25	Tcf25	YES	tr|A0A1D5RM90|A0A1D5RM90_MOUSE Transcription factor 25 OS=Mus musculus OX=10090 GN=Tcf25 PE=1 SV=1;tr|B2ZAC8|B2ZAC8_MOUSE Nuclear localized protein-1 isoform d (Fragment) OS=Mus musculus OX=10090 GN=Tcf25 PE=1 SV=1;sp|Q8R3L2|TCF25_MOUSE Transcription facto	-0.1463	0.0257582	-0.0226209	0.675042	0.123679	-0.230097	0.00306559	-0.106418	0.0790645
Transcription elongation factor B polypeptide 2	Tceb2	NO	sp|P62869|ELOB_MOUSE Elongin-B OS=Mus musculus OX=10090 GN=Elob PE=1 SV=1	-0.0606491	0.0722335	-0.0397949	0.207353	0.0208542	0.0148464	0.619979	0.0357006	0.252676
Transcription elongation factor B polypeptide 1	Tceb1	NO	tr|A0A087WQE6|A0A087WQE6_MOUSE Elongin-C (Fragment) OS=Mus musculus OX=10090 GN=Eloc PE=1 SV=1;tr|A0A087WNT1|A0A087WNT1_MOUSE Elongin-C OS=Mus musculus OX=10090 GN=Eloc PE=1 SV=1;sp|P83940|ELOC_MOUSE Elongin-C OS=Mus musculus OX=10090 GN=Eloc PE=1 SV=1;tr|	-0.0624718	0.634132	0.349228	0.0275727	0.4117	-0.136135	0.314492	0.275564	0.0646675
Transcription elongation factor A protein 1	Tcea1	YES	sp|P10711|TCEA1_MOUSE Transcription elongation factor A protein 1 OS=Mus musculus OX=10090 GN=Tcea1 PE=1 SV=2;tr|E9PYD5|E9PYD5_MOUSE Transcription elongation factor A protein 1 OS=Mus musculus OX=10090 GN=Tcea1 PE=1 SV=1	0.256852	0.000884453	0.153435	0.0129207	-0.103416	-0.17714	0.00654635	-0.280556	0.000527074
Thromboxane-A synthase	Tbxas1	YES	sp|P36423|THAS_MOUSE Thromboxane-A synthase OS=Mus musculus OX=10090 GN=Tbxas1 PE=1 SV=2	-0.169999	0.00139457	-0.181051	0.000974317	-0.0110524	0.207544	0.000436743	0.196492	0.00060469
Thromboxane A2 receptor	Tbxa2r	NO	sp|P30987|TA2R_MOUSE Thromboxane A2 receptor OS=Mus musculus OX=10090 GN=Tbxa2r PE=1 SV=1	-0.235551	0.00541303	-0.0920903	0.163486	0.143461	0.216842	0.00813688	0.360303	0.000516807
Protein TBRG4	Tbrg4	NO	sp|Q91YM4|FAKD4_MOUSE FAST kinase domain-containing protein 4 OS=Mus musculus OX=10090 GN=Tbrg4 PE=1 SV=1;tr|E9PUT1|E9PUT1_MOUSE FAST kinase domain-containing protein 4 OS=Mus musculus OX=10090 GN=Tbrg4 PE=1 SV=1	-0.0580939	0.209722	0.0334121	0.45284	0.091506	0.156869	0.00749376	0.248375	0.000621691
Transducin beta-like protein 2	Tbl2	YES	sp|Q9R099|TBL2_MOUSE Transducin beta-like protein 2 OS=Mus musculus OX=10090 GN=Tbl2 PE=1 SV=2	-0.0640299	0.212346	-0.084716	0.112465	-0.020686	0.223563	0.00204505	0.202877	0.00344588
F-box-like/WD repeat-containing protein TBL1XR1	Tbl1xr1	YES	sp|Q8BHJ5|TBL1R_MOUSE F-box-like/WD repeat-containing protein TBL1XR1 OS=Mus musculus OX=10090 GN=Tbl1xr1 PE=1 SV=1;tr|A0A0J9YV90|A0A0J9YV90_MOUSE F-box-like/WD repeat-containing protein TBL1XR1 OS=Mus musculus OX=10090 GN=Tbl1xr1 PE=1 SV=1	0.0480383	0.195867	0.05375	0.153763	0.00571172	-0.0375702	0.300236	-0.0318585	0.374385
F-box-like/WD repeat-containing protein TBL1X	Tbl1x	NO	sp|Q9QXE7|TBL1X_MOUSE F-box-like/WD repeat-containing protein TBL1X OS=Mus musculus OX=10090 GN=Tbl1x PE=1 SV=2	0.0498933	0.538054	0.207394	0.0313545	0.157501	-0.232817	0.0196215	-0.0753154	0.361147
Serine/threonine-protein kinase TBK1	Tbk1	YES	sp|Q9WUN2|TBK1_MOUSE Serine/threonine-protein kinase TBK1 OS=Mus musculus OX=10090 GN=Tbk1 PE=1 SV=1	-0.159017	0.00206816	-0.192785	0.000693012	-0.0337688	0.088459	0.0327043	0.0546902	0.144196
TBC domain-containing protein kinase-like protein	Tbck	NO	tr|E9Q1W7|E9Q1W7_MOUSE TBC domain-containing protein kinase-like protein OS=Mus musculus OX=10090 GN=Tbck PE=1 SV=1;sp|Q8BM85|TBCK_MOUSE TBC domain-containing protein kinase-like protein OS=Mus musculus OX=10090 GN=Tbck PE=1 SV=1	0.0233899	0.609257	-0.0862352	0.0895847	-0.109625	0.187408	0.00372818	0.0777831	0.118858
Tubulin-specific chaperone cofactor E-like protein	Tbcel	YES	sp|Q8C5W3|TBCEL_MOUSE Tubulin-specific chaperone cofactor E-like protein OS=Mus musculus OX=10090 GN=Tbcel PE=1 SV=1	0.185412	0.00115382	0.120242	0.0109654	-0.06517	0.0128671	0.723311	-0.0523029	0.178069
Tubulin-specific chaperone E	Tbce	NO	sp|Q8CIV8|TBCE_MOUSE Tubulin-specific chaperone E OS=Mus musculus OX=10090 GN=Tbce PE=1 SV=1;tr|E0CZ81|E0CZ81_MOUSE Tubulin-specific chaperone E OS=Mus musculus OX=10090 GN=Tbce PE=1 SV=1	-0.00520867	0.924434	-0.0804912	0.172853	-0.0752825	0.143833	0.030307	0.0685502	0.237053
Tubulin-specific chaperone D	Tbcd	NO	sp|Q8BYA0|TBCD_MOUSE Tubulin-specific chaperone D OS=Mus musculus OX=10090 GN=Tbcd PE=1 SV=1	-0.179941	0.000348478	-0.131741	0.00211169	0.0482002	-0.00734074	0.798177	0.0408594	0.18316
Tubulin-specific chaperone C	Tbcc	NO	tr|A0A0R4J0M1|A0A0R4J0M1_MOUSE Tubulin-specific Chaperone C OS=Mus musculus OX=10090 GN=Tbcc PE=1 SV=1;sp|Q8VCN9|TBCC_MOUSE Tubulin-specific chaperone C OS=Mus musculus OX=10090 GN=Tbcc PE=1 SV=1	-0.0125522	0.762849	-0.0704363	0.122096	-0.0578841	-0.0277351	0.510557	-0.0856192	0.0700233
Tubulin-folding cofactor B	Tbcb	NO	sp|Q9D1E6|TBCB_MOUSE Tubulin-folding cofactor B OS=Mus musculus OX=10090 GN=Tbcb PE=1 SV=2	-0.0551902	0.0943975	-0.0736383	0.0365975	-0.0184482	-0.156517	0.000952504	-0.174965	0.000495729
Tubulin-specific chaperone A	Tbca	YES	tr|A0A1Y7VJ48|A0A1Y7VJ48_MOUSE Tubulin-specific chaperone A OS=Mus musculus OX=10090 GN=Tbca PE=1 SV=1;sp|P48428|TBCA_MOUSE Tubulin-specific chaperone A OS=Mus musculus OX=10090 GN=Tbca PE=1 SV=3	-0.0649913	0.13137	-0.00644139	0.870192	0.0585499	-0.131479	0.0107459	-0.072929	0.0968722
TBC1 domain family member 9B	Tbc1d9b	NO	sp|Q5SVR0|TBC9B_MOUSE TBC1 domain family member 9B OS=Mus musculus OX=10090 GN=Tbc1d9b PE=1 SV=1	-0.176936	0.000221942	-0.122366	0.00192369	0.0545696	-0.0940298	0.00755769	-0.0394602	0.162263
TBC1 domain family member 8B	Tbc1d8b	NO	sp|A3KGB4|TBC8B_MOUSE TBC1 domain family member 8B OS=Mus musculus OX=10090 GN=Tbc1d8b PE=1 SV=1	-0.041602	0.166404	-0.0254007	0.376812	0.0162013	0.111528	0.00443907	0.127729	0.00216213
TBC1 domain family member 8	Tbc1d8	NO	tr|A0A0A6YWY1|A0A0A6YWY1_MOUSE TBC1 domain family member 8 OS=Mus musculus OX=10090 GN=Tbc1d8 PE=1 SV=1;sp|Q9Z1A9|TBCD8_MOUSE TBC1 domain family member 8 OS=Mus musculus OX=10090 GN=Tbc1d8 PE=1 SV=2	0.0841489	0.0751339	0.0665318	0.142459	-0.0176172	0.0978233	0.0456433	0.0802062	0.0867701
TBC1 domain family member 7	Tbc1d7	NO	sp|Q9D0K0|TBCD7_MOUSE TBC1 domain family member 7 OS=Mus musculus OX=10090 GN=Tbc1d7 PE=1 SV=1;tr|A0A1Y7VM03|A0A1Y7VM03_MOUSE TBC1 domain family member 7 (Fragment) OS=Mus musculus OX=10090 GN=Tbc1d7 PE=1 SV=1;tr|A0A1Y7VN27|A0A1Y7VN27_MOUSE TBC1 domain fam	-0.108436	0.221226	-0.224187	0.027669	-0.11575	0.133261	0.142999	0.0175106	0.834381
TBC1 domain family member 5	Tbc1d5	YES	tr|A0A286YDB3|A0A286YDB3_MOUSE TBC1 domain family member 5 OS=Mus musculus OX=10090 GN=Tbc1d5 PE=1 SV=1;sp|Q80XQ2|TBCD5_MOUSE TBC1 domain family member 5 OS=Mus musculus OX=10090 GN=Tbc1d5 PE=1 SV=2	-0.057446	0.0826492	-0.0134192	0.650237	0.0440268	-0.182789	0.000368686	-0.138762	0.00182134
TBC1 domain family member 4	Tbc1d4	NO	tr|E9Q6Q8|E9Q6Q8_MOUSE TBC1 domain family member 4 OS=Mus musculus OX=10090 GN=Tbc1d4 PE=1 SV=1;tr|E0CX53|E0CX53_MOUSE TBC1 domain family member 4 OS=Mus musculus OX=10090 GN=Tbc1d4 PE=1 SV=1;sp|Q8BYJ6|TBCD4_MOUSE TBC1 domain family member 4 OS=Mus musculu	-0.018512	0.712747	-0.037465	0.463199	-0.018953	0.0262944	0.602903	0.00734139	0.883409
TBC1 domain family member 2B	Tbc1d2b	YES	sp|Q3U0J8|TBD2B_MOUSE TBC1 domain family member 2B OS=Mus musculus OX=10090 GN=Tbc1d2b PE=1 SV=2	0.559763	9.31126e-05	0.594459	6.356e-05	0.0346964	-0.0801673	0.286578	-0.0454709	0.533686
TBC1 domain family member 25	Tbc1d25	NO	tr|S4R2S6|S4R2S6_MOUSE TBC1 domain family member 25 OS=Mus musculus OX=10090 GN=Tbc1d25 PE=1 SV=1;tr|E9PWX7|E9PWX7_MOUSE TBC1 domain family member 25 OS=Mus musculus OX=10090 GN=Tbc1d25 PE=1 SV=1;sp|A1A5B6|TBC25_MOUSE TBC1 domain family member 25 OS=Mus mu	0.313703	0.000961425	-0.056636	0.355333	-0.370339	0.243401	0.00387562	-0.126937	0.0623736
TBC1 domain family member 24	Tbc1d24	YES	sp|Q3UUG6|TBC24_MOUSE TBC1 domain family member 24 OS=Mus musculus OX=10090 GN=Tbc1d24 PE=1 SV=2;tr|A0A0J9YUB2|A0A0J9YUB2_MOUSE TBC1 domain family member 24 OS=Mus musculus OX=10090 GN=Tbc1d24 PE=1 SV=1;tr|Q8BRB6|Q8BRB6_MOUSE TBC1 domain family member 24 O	-0.0372438	0.323627	-0.00729977	0.841003	0.029944	-0.0231759	0.529835	0.00676813	0.852413
TBC1 domain family member 23	Tbc1d23	NO	tr|A0A2I3BRD1|A0A2I3BRD1_MOUSE TBC1 domain family member 23 OS=Mus musculus OX=10090 GN=Tbc1d23 PE=1 SV=1;sp|Q8K0F1|TBC23_MOUSE TBC1 domain family member 23 OS=Mus musculus OX=10090 GN=Tbc1d23 PE=1 SV=1;tr|A0A2I3BPS3|A0A2I3BPS3_MOUSE TBC1 domain family mem	-0.0996611	0.018196	-0.147133	0.00275122	-0.0474722	0.0627766	0.0943622	0.0153045	0.651153
TBC1 domain family member 22A	Tbc1d22a	YES	sp|Q8R5A6|TB22A_MOUSE TBC1 domain family member 22A OS=Mus musculus OX=10090 GN=Tbc1d22a PE=1 SV=3	0.0168976	0.596226	-0.00831968	0.792546	-0.0252173	-0.0978485	0.0150157	-0.123066	0.00504498
TBC1 domain family member 20	Tbc1d20	YES	sp|Q9D9I4|TBC20_MOUSE TBC1 domain family member 20 OS=Mus musculus OX=10090 GN=Tbc1d20 PE=1 SV=1;tr|B0R081|B0R081_MOUSE TBC1 domain family member 20 (Fragment) OS=Mus musculus OX=10090 GN=Tbc1d20 PE=1 SV=1	1.99178e-05	0.999561	0.235234	0.000286243	0.235215	0.00698321	0.847418	0.242198	0.000239481
TBC1 domain family member 2A	Tbc1d2	NO	sp|B1AVH7|TBD2A_MOUSE TBC1 domain family member 2A OS=Mus musculus OX=10090 GN=Tbc1d2 PE=2 SV=1	-0.201669	0.000265253	-0.187635	0.000410666	0.0140347	-0.00851577	0.782003	0.00551893	0.857438
TBC1 domain family member 17	Tbc1d17	NO	sp|Q8BYH7|TBC17_MOUSE TBC1 domain family member 17 OS=Mus musculus OX=10090 GN=Tbc1d17 PE=1 SV=2;tr|I6L974|I6L974_MOUSE TBC1 domain family member 17 OS=Mus musculus OX=10090 GN=Tbc1d17 PE=1 SV=1	-0.00624308	0.914765	-0.0822124	0.187733	-0.0759693	0.0667272	0.274625	-0.00924209	0.874172
TBC1 domain family member 15	Tbc1d15	YES	sp|Q9CXF4|TBC15_MOUSE TBC1 domain family member 15 OS=Mus musculus OX=10090 GN=Tbc1d15 PE=1 SV=1	-0.0594809	0.286274	-0.0613278	0.272815	-0.00184688	-0.0304556	0.572927	-0.0323025	0.550481
TBC1 domain family member 14	Tbc1d14	YES	tr|G3UWY9|G3UWY9_MOUSE TBC1 domain family member 14 (Fragment) OS=Mus musculus OX=10090 GN=Tbc1d14 PE=1 SV=1;tr|E9PYB1|E9PYB1_MOUSE TBC1 domain family member 14 OS=Mus musculus OX=10090 GN=Tbc1d14 PE=1 SV=1;tr|E9Q2V7|E9Q2V7_MOUSE TBC1 domain family member	-0.051608	0.476505	-0.22444	0.0138677	-0.172832	0.63123	3.99337e-05	0.458398	0.000297825
TBC1 domain family member 13	Tbc1d13	NO	sp|Q8R3D1|TBC13_MOUSE TBC1 domain family member 13 OS=Mus musculus OX=10090 GN=Tbc1d13 PE=1 SV=1	-0.15592	0.000805474	-0.0521178	0.101105	0.103802	-0.0134234	0.641325	0.0903789	0.0137609
TBC1 domain family member 10B	Tbc1d10b	NO	sp|Q8BHL3|TB10B_MOUSE TBC1 domain family member 10B OS=Mus musculus OX=10090 GN=Tbc1d10b PE=1 SV=2	-0.0855488	0.0637859	-0.0765488	0.0896628	0.00899992	-0.196682	0.00150733	-0.187682	0.00195507
TBC1 domain family member 10A	Tbc1d10a	NO	tr|Q5SPX8|Q5SPX8_MOUSE TBC1 domain family member 10A OS=Mus musculus OX=10090 GN=Tbc1d10a PE=1 SV=1;sp|P58802|TB10A_MOUSE TBC1 domain family member 10A OS=Mus musculus OX=10090 GN=Tbc1d10a PE=1 SV=1	-0.0584875	0.556611	0.173679	0.109847	0.232167	0.0223523	0.820241	0.254519	0.0315736
TBC1 domain family member 1	Tbc1d1	YES	sp|Q60949|TBCD1_MOUSE TBC1 domain family member 1 OS=Mus musculus OX=10090 GN=Tbc1d1 PE=1 SV=3;tr|E9Q6L4|E9Q6L4_MOUSE TBC1 domain family member 1 OS=Mus musculus OX=10090 GN=Tbc1d1 PE=1 SV=1	0.0933892	0.0121325	0.0970271	0.0101681	0.00363796	-0.0703794	0.0390423	-0.0667414	0.0472661
Tax1-binding protein 3	Tax1bp3	YES	sp|Q9DBG9|TX1B3_MOUSE Tax1-binding protein 3 OS=Mus musculus OX=10090 GN=Tax1bp3 PE=1 SV=1;tr|B1AUD9|B1AUD9_MOUSE Tax1-binding protein 3 OS=Mus musculus OX=10090 GN=Tax1bp3 PE=1 SV=1	0.025073	0.744249	0.115213	0.163176	0.09014	-0.285601	0.00630383	-0.195461	0.033465
Tax1-binding protein 1 homolog	Tax1bp1	YES	sp|Q3UKC1|TAXB1_MOUSE Tax1-binding protein 1 homolog OS=Mus musculus OX=10090 GN=Tax1bp1 PE=1 SV=2	-0.0130447	0.643163	0.0226012	0.429511	0.0356459	-0.0762234	0.0257693	-0.0405775	0.176244
Putative deoxyribonuclease TATDN1	Tatdn1	NO	sp|Q6P8M1|TATD1_MOUSE Putative deoxyribonuclease TATDN1 OS=Mus musculus OX=10090 GN=Tatdn1 PE=1 SV=1;tr|A0A0R4J1E8|A0A0R4J1E8_MOUSE Putative deoxyribonuclease TATDN1 OS=Mus musculus OX=10090 GN=Tatdn1 PE=1 SV=1	0.0719552	0.037803	-0.0232733	0.434803	-0.0952286	-0.04381	0.163165	-0.139039	0.00171575
Probable threonine--tRNA ligase 2, cytoplasmic	Tarsl2	YES	sp|Q8BLY2|SYTC2_MOUSE Probable threonine--tRNA ligase 2, cytoplasmic OS=Mus musculus OX=10090 GN=Tarsl2 PE=1 SV=1	0.055921	0.0782915	0.0447352	0.143056	-0.0111858	0.0303754	0.299416	0.0191896	0.501718
Threonine--tRNA ligase, mitochondrial	Tars2	NO	tr|E9Q7H6|E9Q7H6_MOUSE Threonine--tRNA ligase, mitochondrial OS=Mus musculus OX=10090 GN=Tars2 PE=1 SV=1;sp|Q3UQ84|SYTM_MOUSE Threonine--tRNA ligase, mitochondrial OS=Mus musculus OX=10090 GN=Tars2 PE=1 SV=1;tr|Q922A3|Q922A3_MOUSE Tars2 protein OS=Mus musc	0.0106496	0.684617	-0.0294012	0.280804	-0.0400508	0.29483	8.18774e-06	0.254779	2.13681e-05
Threonine--tRNA ligase, cytoplasmic	Tars	YES	sp|Q9D0R2|SYTC_MOUSE Threonine--tRNA ligase, cytoplasmic OS=Mus musculus OX=10090 GN=Tars PE=1 SV=2	0.0240669	0.497044	0.00345603	0.920947	-0.0206108	0.0916754	0.0297083	0.0710646	0.0726268
TAR DNA-binding protein 43	Tardbp	YES	sp|Q921F2|TADBP_MOUSE TAR DNA-binding protein 43 OS=Mus musculus OX=10090 GN=Tardbp PE=1 SV=1;tr|A0A087WRZ5|A0A087WRZ5_MOUSE TAR DNA-binding protein 43 OS=Mus musculus OX=10090 GN=Tardbp PE=1 SV=1;tr|Q8R0B4|Q8R0B4_MOUSE MCG16669, isoform CRA_a OS=Mus muscu	0.0160785	0.646014	-0.0196777	0.575549	-0.0357562	0.00846257	0.807879	-0.0272936	0.442309
RISC-loading complex subunit TARBP2	Tarbp2	NO	tr|D3Z282|D3Z282_MOUSE RISC-loading complex subunit TARBP2 (Fragment) OS=Mus musculus OX=10090 GN=Tarbp2 PE=1 SV=1;tr|D3YZS5|D3YZS5_MOUSE RISC-loading complex subunit TARBP2 (Fragment) OS=Mus musculus OX=10090 GN=Tarbp2 PE=1 SV=1;sp|P97473|TRBP2_MOUSE RISC	-0.0102306	0.839645	-0.0448971	0.387562	-0.0346665	-0.145919	0.020348	-0.180586	0.0077482
Transmembrane anterior posterior transformation protein 1	Tapt1	YES	sp|Q4VBD2|TAPT1_MOUSE Transmembrane anterior posterior transformation protein 1 OS=Mus musculus OX=10090 GN=Tapt1 PE=1 SV=2	-0.100652	0.0586888	0.0104378	0.821372	0.111089	-0.382715	6.18456e-05	-0.271625	0.000515302
Tapasin-related protein	Tapbpl	NO	sp|Q8VD31|TPSNR_MOUSE Tapasin-related protein OS=Mus musculus OX=10090 GN=Tapbpl PE=1 SV=2	-0.0469514	0.456398	-0.0165638	0.788923	0.0303876	0.151126	0.0391341	0.181514	0.0188918
Tapasin	Tapbp	NO	tr|Q3TCU5|Q3TCU5_MOUSE Tapasin OS=Mus musculus OX=10090 GN=Tapbp PE=1 SV=1;sp|Q9R233|TPSN_MOUSE Tapasin OS=Mus musculus OX=10090 GN=Tapbp PE=1 SV=2	-0.0343973	0.258927	0.0727788	0.0357064	0.107176	0.143311	0.00141764	0.250487	4.76362e-05
Antigen peptide transporter 2	Tap2	NO	sp|P36371|TAP2_MOUSE Antigen peptide transporter 2 OS=Mus musculus OX=10090 GN=Tap2 PE=1 SV=1	0.00270614	0.939996	-0.0038193	0.915411	-0.00652544	0.263206	0.000135906	0.256681	0.000158936
Antigen peptide transporter 1	Tap1	NO	tr|Q3TBA3|Q3TBA3_MOUSE Antigen peptide transporter 1 OS=Mus musculus OX=10090 GN=Tap1 PE=1 SV=1;sp|P21958|TAP1_MOUSE Antigen peptide transporter 1 OS=Mus musculus OX=10090 GN=Tap1 PE=1 SV=3	-0.0747557	0.0238223	0.0544933	0.074062	0.129249	0.107273	0.00447578	0.236522	4.21842e-05
	Taok3	YES	tr|F6RXB5|F6RXB5_MOUSE Serine/threonine-protein kinase TAO3 (Fragment) OS=Mus musculus OX=10090 GN=Taok3 PE=1 SV=1	0.26254	0.0109498	-0.0187975	0.812205	-0.281338	0.715484	3.50172e-05	0.434146	0.000769792
Serine/threonine-protein kinase TAO3	Taok3	YES	sp|Q8BYC6|TAOK3_MOUSE Serine/threonine-protein kinase TAO3 OS=Mus musculus OX=10090 GN=Taok3 PE=1 SV=2;tr|A0A0R4J1T3|A0A0R4J1T3_MOUSE Serine/threonine-protein kinase TAO3 (Fragment) OS=Mus musculus OX=10090 GN=Taok3 PE=1 SV=1;tr|Q3V3K3|Q3V3K3_MOUSE Serine/	-0.0149017	0.621896	0.0920264	0.0156117	0.106928	-0.190392	0.000323899	-0.0834636	0.0236372
Serine/threonine-protein kinase TAO2	Taok2	NO	sp|Q6ZQ29|TAOK2_MOUSE Serine/threonine-protein kinase TAO2 OS=Mus musculus OX=10090 GN=Taok2 PE=1 SV=3	-0.0749025	0.295556	-0.179798	0.0303078	-0.104896	0.0860563	0.235263	-0.0188392	0.784284
Serine/threonine-protein kinase TAO1	Taok1	YES	sp|Q5F2E8|TAOK1_MOUSE Serine/threonine-protein kinase TAO1 OS=Mus musculus OX=10090 GN=Taok1 PE=1 SV=1	0.0121765	0.812471	0.0492624	0.352307	0.0370859	-0.0917456	0.10621	-0.0546597	0.305566
TRAF family member-associated NF-kappa-B activator	Tank	YES	tr|A2AR78|A2AR78_MOUSE TRAF family member-associated NF-kappa-B activator OS=Mus musculus OX=10090 GN=Tank PE=1 SV=1;tr|Q8C2D3|Q8C2D3_MOUSE TRAF family member-associated NF-kappa-B activator OS=Mus musculus OX=10090 GN=Tank PE=1 SV=1;tr|A2AR76|A2AR76_MOUSE	-0.0326312	0.805535	0.080091	0.550248	0.112722	-0.669428	0.00123907	-0.556706	0.00340088
Transport and Golgi organization 2 homolog	Tango2	NO	tr|Q8BTN3|Q8BTN3_MOUSE DNA segment, Chr 16, human D22S680E, expressed, isoform CRA_c OS=Mus musculus OX=10090 GN=Tango2 PE=1 SV=1;sp|P54797|TNG2_MOUSE Transport and Golgi organization 2 homolog OS=Mus musculus OX=10090 GN=Tango2 PE=1 SV=1;tr|Q99K56|Q99K56_	-0.129471	0.00395755	-0.0536562	0.122885	0.0758146	0.0559537	0.110131	0.131768	0.00361063
Protein TANC2	Tanc2	NO	sp|A2A690|TANC2_MOUSE Protein TANC2 OS=Mus musculus OX=10090 GN=Tanc2 PE=1 SV=1;tr|F6VP19|F6VP19_MOUSE Protein TANC2 (Fragment) OS=Mus musculus OX=10090 GN=Tanc2 PE=1 SV=1	-0.170694	0.0331636	-0.0160236	0.810519	0.15467	-0.469691	0.000173195	-0.315021	0.00182564
Protein TANC1	Tanc1	YES	sp|Q0VGY8|TANC1_MOUSE Protein TANC1 OS=Mus musculus OX=10090 GN=Tanc1 PE=1 SV=2;tr|E9QAF9|E9QAF9_MOUSE Protein TANC1 OS=Mus musculus OX=10090 GN=Tanc1 PE=1 SV=1	0.189845	0.00321293	-0.112129	0.0355389	-0.301974	-0.0083531	0.851669	-0.310327	0.000187083
Phosphatidate cytidylyltransferase, mitochondrial	Tamm41	NO	tr|G5E881|G5E881_MOUSE Phosphatidate cytidylyltransferase, mitochondrial OS=Mus musculus OX=10090 GN=Tamm41 PE=1 SV=1;sp|Q3TUH1|TAM41_MOUSE Phosphatidate cytidylyltransferase, mitochondrial OS=Mus musculus OX=10090 GN=Tamm41 PE=1 SV=2	0.0283622	0.6987	-0.00995067	0.891434	-0.0383129	0.160688	0.0565679	0.122375	0.125709
Transaldolase	Taldo1	YES	sp|Q93092|TALDO_MOUSE Transaldolase OS=Mus musculus OX=10090 GN=Taldo1 PE=1 SV=2;tr|A0A1B0GR11|A0A1B0GR11_MOUSE Transaldolase OS=Mus musculus OX=10090 GN=Taldo1 PE=1 SV=1	0.154264	0.00133312	0.191128	0.000381042	0.0368631	-0.0634589	0.071062	-0.0265958	0.401791
Transgelin-3	Tagln3	NO	sp|Q9R1Q8|TAGL3_MOUSE Transgelin-3 OS=Mus musculus OX=10090 GN=Tagln3 PE=1 SV=1	0.271096	0.0472746	-0.0307659	0.792514	-0.301862	0.846465	0.000143875	0.544603	0.00194805
Transgelin-2	Tagln2	NO	sp|Q9WVA4|TAGL2_MOUSE Transgelin-2 OS=Mus musculus OX=10090 GN=Tagln2 PE=1 SV=4	0.0332755	0.385721	0.107043	0.0208816	0.0737674	-0.191842	0.00112536	-0.118075	0.0136423
	Taf15	YES	tr|F6QCI0|F6QCI0_MOUSE TATA-box-binding protein-associated factor 15 (Fragment) OS=Mus musculus OX=10090 GN=Taf15 PE=1 SV=1;tr|Q8BQ46|Q8BQ46_MOUSE TAF15 RNA polymerase II, TATA box binding protein (TBP)-associated factor OS=Mus musculus OX=10090 GN=Taf15 P	0.140068	0.120637	0.204608	0.0366068	0.0645397	0.041074	0.619978	0.105614	0.224356
Translational activator of cytochrome c oxidase 1	Taco1	NO	sp|Q8K0Z7|TACO1_MOUSE Translational activator of cytochrome c oxidase 1 OS=Mus musculus OX=10090 GN=Taco1 PE=1 SV=1	-0.0884023	0.54056	-0.045757	0.748893	0.0426453	-0.0584787	0.68321	-0.0158335	0.911498
Transforming acidic coiled-coil-containing protein 1	Tacc1	YES	tr|F8VQ95|F8VQ95_MOUSE Transforming acidic coiled-coil-containing protein 1 OS=Mus musculus OX=10090 GN=Tacc1 PE=1 SV=1;sp|Q6Y685|TACC1_MOUSE Transforming acidic coiled-coil-containing protein 1 OS=Mus musculus OX=10090 GN=Tacc1 PE=1 SV=1	0.115041	0.00637751	0.120086	0.00514453	0.00504439	-0.441056	1.74119e-06	-0.436011	1.88109e-06
TGF-beta-activated kinase 1 and MAP3K7-binding protein 2	Tab2	YES	sp|Q99K90|TAB2_MOUSE TGF-beta-activated kinase 1 and MAP3K7-binding protein 2 OS=Mus musculus OX=10090 GN=Tab2 PE=1 SV=1;tr|D3Z216|D3Z216_MOUSE TGF-beta-activated kinase 1 and MAP3K7-binding protein 2 (Fragment) OS=Mus musculus OX=10090 GN=Tab2 PE=1 SV=1	-0.250628	0.327673	-0.180871	0.472341	0.0697572	-0.520897	0.0652817	-0.45114	0.100368
TGF-beta-activated kinase 1 and MAP3K7-binding protein 1	Tab1	NO	sp|Q8CF89|TAB1_MOUSE TGF-beta-activated kinase 1 and MAP3K7-binding protein 1 OS=Mus musculus OX=10090 GN=Tab1 PE=1 SV=2	-0.0545249	0.101902	-0.07113	0.0439296	-0.0166051	0.0136519	0.651411	-0.00295315	0.921561
Protein SZT2	Szt2	NO	sp|A2A9C3|SZT2_MOUSE KICSTOR complex protein SZT2 OS=Mus musculus OX=10090 GN=Szt2 PE=1 SV=1	-0.0808892	0.367905	-0.231536	0.0285783	-0.150647	0.364966	0.00347685	0.214319	0.0384015
SUZ domain-containing protein 1	Szrd1	YES	tr|A2AA85|A2AA85_MOUSE SUZ domain-containing protein 1 (Fragment) OS=Mus musculus OX=10090 GN=Szrd1 PE=1 SV=1;sp|Q6NXN1|SZRD1_MOUSE SUZ domain-containing protein 1 OS=Mus musculus OX=10090 GN=Szrd1 PE=1 SV=1	0.0561118	0.385845	0.0220177	0.727316	-0.034094	-0.504271	7.64152e-05	-0.538365	5.03307e-05
E3 ubiquitin-protein ligase synoviolin	Syvn1	YES	tr|E9QQ99|E9QQ99_MOUSE E3 ubiquitin-protein ligase synoviolin OS=Mus musculus OX=10090 GN=Syvn1 PE=1 SV=1;tr|D3Z1Y1|D3Z1Y1_MOUSE E3 ubiquitin-protein ligase synoviolin OS=Mus musculus OX=10090 GN=Syvn1 PE=1 SV=1;tr|A0A0R4J1R1|A0A0R4J1R1_MOUSE E3 ubiquitin-	-0.517883	0.00062401	0.016559	0.855573	0.534442	-0.168682	0.0962263	0.36576	0.00429514
Synaptotagmin-like protein 4	Sytl4	YES	sp|Q9R0Q1|SYTL4_MOUSE Synaptotagmin-like protein 4 OS=Mus musculus OX=10090 GN=Sytl4 PE=1 SV=1	-0.130898	0.00659317	-0.0707236	0.077618	0.0601744	-0.29173	6.44797e-05	-0.231555	0.000273137
Synaptotagmin-13	Syt13	YES	sp|Q9EQT6|SYT13_MOUSE Synaptotagmin-13 OS=Mus musculus OX=10090 GN=Syt13 PE=1 SV=1	-0.211935	0.0493763	-0.0934268	0.32949	0.118509	-0.684327	0.000126078	-0.565819	0.000405463
Protein SYS1 homolog	Sys1	NO	sp|Q78S06|SYS1_MOUSE Protein SYS1 homolog OS=Mus musculus OX=10090 GN=Sys1 PE=2 SV=1	-0.0935708	0.501765	-0.0965625	0.488667	-0.00299171	-0.595503	0.00285871	-0.598494	0.0027831
Synaptophysin-like protein 1	Sypl1	NO	sp|O09117|SYPL1_MOUSE Synaptophysin-like protein 1 OS=Mus musculus OX=10090 GN=Sypl1 PE=1 SV=2	0.142911	0.00500381	0.0719855	0.0812131	-0.0709254	0.158075	0.00296034	0.08715	0.0432692
	Sypl	YES	tr|D6RFU9|D6RFU9_MOUSE Synaptophysin-like protein OS=Mus musculus OX=10090 GN=Sypl PE=1 SV=1	0.0658143	0.494562	0.123683	0.218051	0.0578684	0.188454	0.0783654	0.246322	0.0310881
Synaptophysin	Syp	NO	sp|Q62277|SYPH_MOUSE Synaptophysin OS=Mus musculus OX=10090 GN=Syp PE=1 SV=2	-0.281881	0.00288283	-0.23342	0.00755024	0.0484607	0.225841	0.00884911	0.274301	0.00333158
Synergin gamma	Synrg	NO	tr|V9GX40|V9GX40_MOUSE Synergin gamma OS=Mus musculus OX=10090 GN=Synrg PE=1 SV=1;sp|Q5SV85|SYNRG_MOUSE Synergin gamma OS=Mus musculus OX=10090 GN=Synrg PE=1 SV=1;tr|V9GXD9|V9GXD9_MOUSE Synergin gamma OS=Mus musculus OX=10090 GN=Synrg PE=1 SV=1	-0.0516904	0.280346	0.075154	0.132966	0.126844	-0.801404	4.3691e-07	-0.674559	1.40005e-06
Synaptojanin-2-binding protein	Synj2bp;Gm20498	YES	sp|Q9D6K5|SYJ2B_MOUSE Synaptojanin-2-binding protein OS=Mus musculus OX=10090 GN=Synj2bp PE=1 SV=1;tr|E9PVN6|E9PVN6_MOUSE Synaptojanin-2-binding protein OS=Mus musculus OX=10090 GN=Gm20498 PE=1 SV=1	-0.0465532	0.294077	0.0205314	0.63212	0.0670846	0.369079	4.61591e-05	0.436163	1.56059e-05
Synaptojanin-2	Synj2	YES	tr|E9Q4P5|E9Q4P5_MOUSE Synaptojanin-2 OS=Mus musculus OX=10090 GN=Synj2 PE=1 SV=1;tr|D3YZB4|D3YZB4_MOUSE Synaptojanin-2 OS=Mus musculus OX=10090 GN=Synj2 PE=1 SV=1;tr|D3YZB2|D3YZB2_MOUSE Synaptojanin-2 OS=Mus musculus OX=10090 GN=Synj2 PE=1 SV=1;tr|F8WHD8|	0.0405899	0.610882	0.0298847	0.70668	-0.0107052	-0.940272	5.85037e-06	-0.950977	5.42642e-06
Synaptojanin-1	Synj1	NO	tr|D3Z656|D3Z656_MOUSE Synaptojanin-1 OS=Mus musculus OX=10090 GN=Synj1 PE=1 SV=1;sp|Q8CHC4|SYNJ1_MOUSE Synaptojanin-1 OS=Mus musculus OX=10090 GN=Synj1 PE=1 SV=3;tr|E9Q7S0|E9Q7S0_MOUSE Synaptojanin-1 OS=Mus musculus OX=10090 GN=Synj1 PE=1 SV=1;tr|F7BQW7|F	-0.0928682	0.0458662	-0.162615	0.00388396	-0.0697464	-0.217518	0.000777067	-0.287265	0.000144601
Synaptogyrin-2	Syngr2;Gm20708	NO	tr|B0QZP8|B0QZP8_MOUSE Synaptogyrin 2, isoform CRA_c OS=Mus musculus OX=10090 GN=Syngr2 PE=4 SV=1;sp|O55101|SNG2_MOUSE Synaptogyrin-2 OS=Mus musculus OX=10090 GN=Syngr2 PE=2 SV=1;tr|H3BJY1|H3BJY1_MOUSE Synaptogyrin-2 OS=Mus musculus OX=10090 GN=Syngr2 PE=4	-0.0195551	0.65404	-0.319197	0.000130355	-0.299642	0.725769	5.88274e-07	0.426127	2.0497e-05
Synaptogyrin-1	Syngr1	NO	sp|O55100|SNG1_MOUSE Synaptogyrin-1 OS=Mus musculus OX=10090 GN=Syngr1 PE=1 SV=2	-0.178578	0.0255638	0.0793692	0.248498	0.257947	0.0320537	0.626645	0.290001	0.00255691
Nesprin-3	Syne3	YES	sp|Q4FZC9|SYNE3_MOUSE Nesprin-3 OS=Mus musculus OX=10090 GN=Syne3 PE=1 SV=1	0.360182	9.73581e-06	0.159849	0.00150243	-0.200333	0.247637	0.000109563	0.0473038	0.177625
Nesprin-1	Syne1	YES	tr|A0A1L1STC6|A0A1L1STC6_MOUSE Nesprin-1 OS=Mus musculus OX=10090 GN=Syne1 PE=1 SV=1;sp|Q6ZWR6|SYNE1_MOUSE Nesprin-1 OS=Mus musculus OX=10090 GN=Syne1 PE=1 SV=2	-0.0630237	0.115141	-0.0290068	0.43465	0.0340169	0.0134478	0.712192	0.0474647	0.217446
Heterogeneous nuclear ribonucleoprotein Q	Syncrip	YES	tr|A0A0R4J259|A0A0R4J259_MOUSE Heterogeneous nuclear ribonucleoprotein Q OS=Mus musculus OX=10090 GN=Syncrip PE=1 SV=1;tr|G3UZI2|G3UZI2_MOUSE Heterogeneous nuclear ribonucleoprotein Q OS=Mus musculus OX=10090 GN=Syncrip PE=1 SV=1;sp|Q7TMK9|HNRPQ_MOUSE Hete	0.0543661	0.087162	0.0557846	0.0807599	0.00141852	0.0859548	0.0164417	0.0873734	0.0153026
Tyrosine-protein kinase	Syk	NO	tr|E9PWE9|E9PWE9_MOUSE Tyrosine-protein kinase OS=Mus musculus OX=10090 GN=Syk PE=1 SV=1	-0.0479717	0.400619	-0.0263077	0.638557	0.021664	-0.189047	0.00981754	-0.167383	0.0170187
Tyrosine-protein kinase SYK	Syk	NO	sp|P48025|KSYK_MOUSE Tyrosine-protein kinase SYK OS=Mus musculus OX=10090 GN=Syk PE=1 SV=2	0.0679835	0.115888	-0.146706	0.00622039	-0.214689	0.0863647	0.0568429	-0.128325	0.0117896
Synapse-associated protein 1	Syap1	NO	sp|Q9D5V6|SYAP1_MOUSE Synapse-associated protein 1 OS=Mus musculus OX=10090 GN=Syap1 PE=1 SV=1	0.0549048	0.215655	0.117403	0.0228526	0.0624986	-0.506354	5.18127e-06	-0.443856	1.23865e-05
Switch-associated protein 70	Swap70	NO	sp|Q6A028|SWP70_MOUSE Switch-associated protein 70 OS=Mus musculus OX=10090 GN=Swap70 PE=1 SV=2	0.0335879	0.378669	0.0948425	0.0330656	0.0612546	-0.0759726	0.0714676	-0.0147179	0.692736
Small VCP/p97-interacting protein	Svip	YES	sp|Q3UZP4|SVIP_MOUSE Small VCP/p97-interacting protein OS=Mus musculus OX=10090 GN=Svip PE=3 SV=1	-0.0686146	0.440584	-0.0992462	0.27578	-0.0306316	-0.178159	0.0717892	-0.208791	0.0420635
	Svil	NO	tr|E9Q3Z5|E9Q3Z5_MOUSE Supervillin OS=Mus musculus OX=10090 GN=Svil PE=1 SV=1	0.0377876	0.728991	0.430245	0.00465365	0.392458	-0.252992	0.0468233	0.139466	0.225177
Supervillin	Svil	NO	tr|A0A1B0GS91|A0A1B0GS91_MOUSE Supervillin OS=Mus musculus OX=10090 GN=Svil PE=1 SV=1;sp|Q8K4L3|SVIL_MOUSE Supervillin OS=Mus musculus OX=10090 GN=Svil PE=1 SV=1;tr|Q8K4L2|Q8K4L2_MOUSE Archvillin OS=Mus musculus OX=10090 GN=Svil PE=1 SV=1	0.12177	0.0229452	0.0634245	0.173737	-0.0583451	-0.547676	3.94431e-06	-0.606021	2.00331e-06
Sushi domain-containing protein 3	Susd3	NO	tr|D3YY27|D3YY27_MOUSE Sushi domain-containing protein 3 (Fragment) OS=Mus musculus OX=10090 GN=Susd3 PE=1 SV=1;sp|Q9D176|SUSD3_MOUSE Sushi domain-containing protein 3 OS=Mus musculus OX=10090 GN=Susd3 PE=2 SV=1	0.126997	0.138371	-0.00354615	0.964014	-0.130543	0.211	0.0275348	0.0804572	0.324239
Sushi domain-containing protein 2	Susd2	NO	sp|Q9DBX3|SUSD2_MOUSE Sushi domain-containing protein 2 OS=Mus musculus OX=10090 GN=Susd2 PE=1 SV=1	0.666551	0.00215081	0.0303366	0.834966	-0.636215	-0.0291401	0.841366	-0.665355	0.00217202
	Susd1	NO	tr|A2AN91|A2AN91_MOUSE Sushi domain-containing 1 OS=Mus musculus OX=10090 GN=Susd1 PE=1 SV=1;tr|E9Q3H4|E9Q3H4_MOUSE Sushi domain-containing 1 OS=Mus musculus OX=10090 GN=Susd1 PE=1 SV=1	0.00696815	0.90519	-0.006171	0.915984	-0.0131392	0.22945	0.00489403	0.216311	0.00657654
Surfeit locus protein 4	Surf4	YES	sp|Q64310|SURF4_MOUSE Surfeit locus protein 4 OS=Mus musculus OX=10090 GN=Surf4 PE=1 SV=1;tr|E0CXD9|E0CXD9_MOUSE Surfeit locus protein 4 OS=Mus musculus OX=10090 GN=Surf4 PE=1 SV=1	0.0948405	0.0383343	0.0966542	0.0357175	0.00181378	0.327632	5.25528e-05	0.329446	5.07256e-05
Surfeit locus protein 1	Surf1	NO	tr|A0A0A6YVR9|A0A0A6YVR9_MOUSE SURF1-like protein (Fragment) OS=Mus musculus OX=10090 GN=Surf1 PE=1 SV=1;sp|P09925|SURF1_MOUSE Surfeit locus protein 1 OS=Mus musculus OX=10090 GN=Surf1 PE=1 SV=3;tr|V9GXE6|V9GXE6_MOUSE SURF1-like protein (Fragment) OS=Mus m	-0.17244	0.00123702	0.0172962	0.614969	0.189736	0.21051	0.000384664	0.400246	6.36898e-06
ATP-dependent RNA helicase SUPV3L1, mitochondrial	Supv3l1	YES	sp|Q80YD1|SUV3_MOUSE ATP-dependent RNA helicase SUPV3L1, mitochondrial OS=Mus musculus OX=10090 GN=Supv3l1 PE=1 SV=1	0.0193591	0.648836	0.0220101	0.605469	0.00265101	0.151377	0.00762397	0.154028	0.0070055
Transcription elongation factor SPT5	Supt5h	NO	sp|O55201|SPT5H_MOUSE Transcription elongation factor SPT5 OS=Mus musculus OX=10090 GN=Supt5h PE=1 SV=1	0.0536084	0.201425	-0.086377	0.0575618	-0.139985	-0.168	0.00316486	-0.307985	8.96699e-05
Transcription elongation factor SPT4-B;Transcription elongation factor SPT4-A	Supt4h1b;Supt4h1a	NO	sp|Q9Z199|SPT4B_MOUSE Transcription elongation factor SPT4-B OS=Mus musculus OX=10090 GN=Supt4h1b PE=2 SV=1;sp|P63271|SPT4A_MOUSE Transcription elongation factor SPT4-A OS=Mus musculus OX=10090 GN=Supt4h1a PE=2 SV=1	0.308581	0.131387	0.0498771	0.790211	-0.258703	0.348878	0.0948543	0.0901747	0.632606
Sulfite oxidase, mitochondrial	Suox	NO	sp|Q8R086|SUOX_MOUSE Sulfite oxidase, mitochondrial OS=Mus musculus OX=10090 GN=Suox PE=1 SV=2	-0.102944	0.0576462	-0.0450741	0.353037	0.0578698	0.0219808	0.642336	0.0798506	0.12171
Small ubiquitin-related modifier;Small ubiquitin-related modifier 3	Sumo3	NO	tr|G3UZ60|G3UZ60_MOUSE Small ubiquitin-related modifier 3 OS=Mus musculus OX=10090 GN=Gm49325 PE=1 SV=1;tr|G3UWI9|G3UWI9_MOUSE SMT3 suppressor of mif two 3 homolog 3 (Yeast), isoform CRA_c OS=Mus musculus OX=10090 GN=Sumo3 PE=1 SV=1;tr|G3UWX9|G3UWX9_MOUSE	-0.194014	0.0236024	-0.0677035	0.346974	0.12631	-0.175274	0.0352037	-0.0489644	0.489529
Small ubiquitin-related modifier 2	Sumo2;Sumo3	YES	tr|H7BWX9|H7BWX9_MOUSE Small ubiquitin-related modifier 2 OS=Mus musculus OX=10090 GN=Sumo2 PE=1 SV=1;tr|D3Z794|D3Z794_MOUSE Small ubiquitin-related modifier 2 OS=Mus musculus OX=10090 GN=Sumo2 PE=1 SV=1;sp|P61957|SUMO2_MOUSE Small ubiquitin-related modifi	-0.00886926	0.876767	0.0492843	0.40132	0.0581535	-0.196154	0.00943932	-0.138	0.0412066
Sulfatase-modifying factor 2	Sumf2	NO	sp|Q8BPG6|SUMF2_MOUSE Inactive C-alpha-formylglycine-generating enzyme 2 OS=Mus musculus OX=10090 GN=Sumf2 PE=1 SV=2	0.356912	0.144318	0.297768	0.212574	-0.0591435	-0.303582	0.20476	-0.362725	0.138842
Sulfatase-modifying factor 1	Sumf1	NO	sp|Q8R0F3|SUMF1_MOUSE Formylglycine-generating enzyme OS=Mus musculus OX=10090 GN=Sumf1 PE=1 SV=2;tr|E9Q0Z7|E9Q0Z7_MOUSE Formylglycine-generating enzyme OS=Mus musculus OX=10090 GN=Sumf1 PE=1 SV=1;tr|E9Q265|E9Q265_MOUSE Formylglycine-generating enzyme OS=M	-0.192481	0.008753	-0.170219	0.0153874	0.0222619	-0.0312816	0.575474	-0.00901978	0.870306
Suppressor of G2 allele of SKP1 homolog	Sugt1	NO	sp|Q9CX34|SGT1_MOUSE Protein SGT1 homolog OS=Mus musculus OX=10090 GN=Sugt1 PE=1 SV=3	0.00168056	0.953642	0.0168551	0.564805	0.0151746	-0.0981979	0.00991157	-0.0830234	0.0208991
Succinyl-CoA ligase [GDP-forming] subunit beta, mitochondrial	Suclg2	NO	sp|Q9Z2I8|SUCB2_MOUSE Succinate--CoA ligase [GDP-forming] subunit beta, mitochondrial OS=Mus musculus OX=10090 GN=Suclg2 PE=1 SV=3	0.00854794	0.754273	0.0112965	0.679967	0.00274855	0.0524112	0.0865172	0.0551598	0.074186
Succinyl-CoA ligase [ADP/GDP-forming] subunit alpha, mitochondrial	Suclg1	NO	sp|Q9WUM5|SUCA_MOUSE Succinate--CoA ligase [ADP/GDP-forming] subunit alpha, mitochondrial OS=Mus musculus OX=10090 GN=Suclg1 PE=1 SV=4	-0.0185023	0.634616	-0.0736561	0.0889228	-0.0551538	0.192217	0.00135908	0.137063	0.00802705
Succinyl-CoA ligase [ADP-forming] subunit beta, mitochondrial	Sucla2	YES	sp|Q9Z2I9|SUCB1_MOUSE Succinate--CoA ligase [ADP-forming] subunit beta, mitochondrial OS=Mus musculus OX=10090 GN=Sucla2 PE=1 SV=2	-0.0597572	0.0681885	-0.0598675	0.0677907	-0.000110271	0.189502	0.000257299	0.189392	0.000258217
Activated RNA polymerase II transcriptional coactivator p15	Sub1	NO	sp|P11031|TCP4_MOUSE Activated RNA polymerase II transcriptional coactivator p15 OS=Mus musculus OX=10090 GN=Sub1 PE=1 SV=3	0.795936	5.3024e-06	0.665456	1.72845e-05	-0.130479	-0.098736	0.164728	-0.229215	0.00885179
Tyrosine-protein kinase STYK1	Styk1	NO	sp|Q6J9G1|STYK1_MOUSE Tyrosine-protein kinase STYK1 OS=Mus musculus OX=10090 GN=Styk1 PE=2 SV=2	0.581632	6.35427e-07	0.504494	1.65941e-06	-0.0771383	0.243095	0.000192123	0.165956	0.00181596
Syntaxin-binding protein 5	Stxbp5	YES	sp|Q8K400|STXB5_MOUSE Syntaxin-binding protein 5 OS=Mus musculus OX=10090 GN=Stxbp5 PE=1 SV=3;tr|D3Z079|D3Z079_MOUSE Syntaxin-binding protein 5 OS=Mus musculus OX=10090 GN=Stxbp5 PE=1 SV=1;tr|D3Z2Q2|D3Z2Q2_MOUSE Syntaxin-binding protein 5 OS=Mus musculus O	0.012282	0.659735	-0.00600487	0.828613	-0.0182869	-0.00610294	0.825869	-0.0243898	0.391889
Syntaxin-binding protein 4	Stxbp4	YES	sp|Q9WV89|STXB4_MOUSE Syntaxin-binding protein 4 OS=Mus musculus OX=10090 GN=Stxbp4 PE=1 SV=1	-0.240494	0.0738094	0.0570417	0.633027	0.297535	-0.550239	0.00200004	-0.252704	0.0630885
Syntaxin-binding protein 3	Stxbp3	YES	sp|Q60770|STXB3_MOUSE Syntaxin-binding protein 3 OS=Mus musculus OX=10090 GN=Stxbp3 PE=1 SV=1	0.0661269	0.123068	0.0698809	0.106427	0.00375402	0.0140817	0.719648	0.0178358	0.650352
	Stxbp2	NO	tr|F8WGM5|F8WGM5_MOUSE Syntaxin-binding protein 2 (Fragment) OS=Mus musculus OX=10090 GN=Stxbp2 PE=1 SV=1	-0.0186775	0.799038	-0.0159855	0.827397	0.00269206	-0.194121	0.0288748	-0.191429	0.0304979
Syntaxin-binding protein 2	Stxbp2	NO	sp|Q64324|STXB2_MOUSE Syntaxin-binding protein 2 OS=Mus musculus OX=10090 GN=Stxbp2 PE=1 SV=1	-0.175444	0.000495694	-0.114557	0.00525756	0.0608874	0.0549067	0.0965224	0.115794	0.00497905
Syntaxin-binding protein 1	Stxbp1	NO	sp|O08599|STXB1_MOUSE Syntaxin-binding protein 1 OS=Mus musculus OX=10090 GN=Stxbp1 PE=1 SV=2	-0.185834	0.00072154	-0.162864	0.00153577	0.02297	0.0662321	0.0795332	0.0892021	0.0281807
Syntaxin-8	Stx8	NO	sp|O88983|STX8_MOUSE Syntaxin-8 OS=Mus musculus OX=10090 GN=Stx8 PE=1 SV=1	0.0604152	0.0912138	-0.179292	0.000682215	-0.239707	-0.0187168	0.562902	-0.258424	7.24279e-05
Syntaxin-7	Stx7	YES	tr|Q8BH40|Q8BH40_MOUSE Syntaxin-7 OS=Mus musculus OX=10090 GN=Stx7 PE=1 SV=1;sp|O70439|STX7_MOUSE Syntaxin-7 OS=Mus musculus OX=10090 GN=Stx7 PE=1 SV=3	0.195092	0.00516976	0.0667069	0.211739	-0.128385	0.0693358	0.196253	-0.0590489	0.263139
Syntaxin-6	Stx6	YES	sp|Q9JKK1|STX6_MOUSE Syntaxin-6 OS=Mus musculus OX=10090 GN=Stx6 PE=1 SV=1;tr|A0A0A6YXG0|A0A0A6YXG0_MOUSE Syntaxin-6 OS=Mus musculus OX=10090 GN=Stx6 PE=1 SV=1	-0.0251567	0.62719	-0.0518459	0.330264	-0.0266892	0.0765347	0.166624	0.0498455	0.347994
Syntaxin-5	Stx5;Stx5a	NO	sp|Q8K1E0|STX5_MOUSE Syntaxin-5 OS=Mus musculus OX=10090 GN=Stx5 PE=1 SV=3;tr|I1E4X1|I1E4X1_MOUSE Syntaxin 5A OS=Mus musculus OX=10090 GN=Stx5a PE=1 SV=1;tr|H3BJE3|H3BJE3_MOUSE Syntaxin 5A (Fragment) OS=Mus musculus OX=10090 GN=Stx5a PE=1 SV=1;tr|H3BKJ7|H3	0.00521569	0.884506	-0.0451928	0.233382	-0.0504085	-0.0267398	0.465315	-0.0771483	0.0615309
Syntaxin-4	Stx4	NO	sp|P70452|STX4_MOUSE Syntaxin-4 OS=Mus musculus OX=10090 GN=Stx4 PE=1 SV=1	0.271703	0.000465701	0.0465974	0.322829	-0.225106	0.161214	0.00800953	-0.0638912	0.188283
Syntaxin-2	Stx2	NO	tr|Q3TJ55|Q3TJ55_MOUSE Syntaxin-2 OS=Mus musculus OX=10090 GN=Stx2 PE=1 SV=1;tr|Q80W45|Q80W45_MOUSE Syntaxin-2 OS=Mus musculus OX=10090 GN=Stx2 PE=1 SV=1;sp|Q00262|STX2_MOUSE Syntaxin-2 OS=Mus musculus OX=10090 GN=Stx2 PE=1 SV=1	0.0332113	0.610556	-0.131756	0.0727064	-0.164968	0.321066	0.00137063	0.156099	0.0410369
Syntaxin-18	Stx18	NO	sp|Q8VDS8|STX18_MOUSE Syntaxin-18 OS=Mus musculus OX=10090 GN=Stx18 PE=1 SV=2;tr|D3YY98|D3YY98_MOUSE Syntaxin-18 (Fragment) OS=Mus musculus OX=10090 GN=Stx18 PE=1 SV=1;tr|A0A0J9YTY5|A0A0J9YTY5_MOUSE Syntaxin-18 (Fragment) OS=Mus musculus OX=10090 GN=Stx18	-0.0257104	0.463147	-0.0278407	0.428518	-0.00213029	0.142631	0.00364047	0.1405	0.00393767
Syntaxin-17	Stx17	YES	sp|Q9D0I4|STX17_MOUSE Syntaxin-17 OS=Mus musculus OX=10090 GN=Stx17 PE=1 SV=1;tr|B1AVI2|B1AVI2_MOUSE Syntaxin-17 (Fragment) OS=Mus musculus OX=10090 GN=Stx17 PE=1 SV=1;tr|Q9D614|Q9D614_MOUSE Syntaxin 17, isoform CRA_b OS=Mus musculus OX=10090 GN=Stx17 PE=1	-0.165352	0.030086	-0.0327312	0.60701	0.132621	-0.190451	0.0167905	-0.0578303	0.373311
Syntaxin-16	Stx16	NO	tr|F6X4N5|F6X4N5_MOUSE Syntaxin-16 OS=Mus musculus OX=10090 GN=Stx16 PE=1 SV=1;sp|Q8BVI5|STX16_MOUSE Syntaxin-16 OS=Mus musculus OX=10090 GN=Stx16 PE=1 SV=3;tr|F7CJY7|F7CJY7_MOUSE Syntaxin-16 (Fragment) OS=Mus musculus OX=10090 GN=Stx16 PE=1 SV=1;tr|B7ZCB8	0.119919	0.0025572	-0.0519602	0.0867888	-0.171879	0.0308089	0.275941	-0.14107	0.00103498
Syntaxin-12	Stx12	NO	sp|Q9ER00|STX12_MOUSE Syntaxin-12 OS=Mus musculus OX=10090 GN=Stx12 PE=1 SV=1	0.0949583	0.0463361	-0.0503118	0.240577	-0.14527	0.0439191	0.299852	-0.101351	0.036556
Syntaxin-11	Stx11	NO	tr|Q3U5V8|Q3U5V8_MOUSE MCG49559 OS=Mus musculus OX=10090 GN=Stx11 PE=1 SV=1;sp|Q9D3G5|STX11_MOUSE Syntaxin-11 OS=Mus musculus OX=10090 GN=Stx11 PE=1 SV=1	-0.0714512	0.0571386	-0.105296	0.012328	-0.0338451	0.173289	0.000919342	0.139444	0.00307193
STIP1 homology and U box-containing protein 1	Stub1	NO	sp|Q9WUD1|CHIP_MOUSE STIP1 homology and U box-containing protein 1 OS=Mus musculus OX=10090 GN=Stub1 PE=1 SV=1	-0.200952	0.0129021	-0.189207	0.0168527	0.0117451	0.125206	0.0774674	0.136951	0.0582346
Dolichyl-diphosphooligosaccharide--protein glycosyltransferase subunit STT3B	Stt3b	YES	tr|A0A0R4J0D3|A0A0R4J0D3_MOUSE Dolichyl-diphosphooligosaccharide--protein glycosyltransferase subunit STT3B OS=Mus musculus OX=10090 GN=Stt3b PE=1 SV=1;sp|Q3TDQ1|STT3B_MOUSE Dolichyl-diphosphooligosaccharide--protein glycosyltransferase subunit STT3B OS=Mu	0.077664	0.0855557	-0.0235979	0.561911	-0.101262	0.118194	0.0188585	0.0169323	0.675384
Dolichyl-diphosphooligosaccharide--protein glycosyltransferase subunit STT3A	Stt3a	YES	sp|P46978|STT3A_MOUSE Dolichyl-diphosphooligosaccharide--protein glycosyltransferase subunit STT3A OS=Mus musculus OX=10090 GN=Stt3a PE=1 SV=1	0.0315164	0.278834	-0.0330586	0.257992	-0.064575	0.242382	4.49688e-05	0.177807	0.000313296
Steryl-sulfatase	Sts	NO	sp|P50427|STS_MOUSE Steryl-sulfatase OS=Mus musculus OX=10090 GN=Sts PE=1 SV=1	0.00553252	0.929177	-0.0182454	0.770102	-0.0237779	0.153958	0.0377011	0.13018	0.0672465
Striatin-4	Strn4	NO	sp|P58404|STRN4_MOUSE Striatin-4 OS=Mus musculus OX=10090 GN=Strn4 PE=1 SV=2	-0.0782623	0.25667	-0.0614967	0.36404	0.0167656	-0.206843	0.0139714	-0.190077	0.020171
Striatin-3	Strn3	YES	sp|Q9ERG2|STRN3_MOUSE Striatin-3 OS=Mus musculus OX=10090 GN=Strn3 PE=1 SV=1	0.0161845	0.694113	-0.0279286	0.502256	-0.0441131	0.00547293	0.893646	-0.0386402	0.360503
	Strn3	YES	tr|B2RQS1|B2RQS1_MOUSE Striatin-3 OS=Mus musculus OX=10090 GN=Strn3 PE=1 SV=1	-0.127414	0.170982	-0.00138191	0.987248	0.126032	-0.120208	0.193239	0.00582411	0.946305
Striatin	Strn	YES	sp|O55106|STRN_MOUSE Striatin OS=Mus musculus OX=10090 GN=Strn PE=1 SV=2;tr|F8WH41|F8WH41_MOUSE Striatin OS=Mus musculus OX=10090 GN=Strn PE=1 SV=1	-0.0138407	0.560333	-0.00192958	0.93446	0.0119111	-0.114779	0.00150136	-0.102868	0.0027384
Striatin-interacting protein 1	Strip1	YES	sp|Q8C079|STRP1_MOUSE Striatin-interacting protein 1 OS=Mus musculus OX=10090 GN=Strip1 PE=1 SV=2	-0.0218339	0.41158	-0.0528631	0.0727162	-0.0310292	0.0286526	0.28968	-0.00237662	0.926927
Spermatid perinuclear RNA-binding protein	Strbp	YES	sp|Q91WM1|STRBP_MOUSE Spermatid perinuclear RNA-binding protein OS=Mus musculus OX=10090 GN=Strbp PE=1 SV=1	0.0273032	0.755544	0.507121	0.000560468	0.479817	0.32832	0.00608598	0.808138	3.06842e-05
Serine-threonine kinase receptor-associated protein	Strap	NO	sp|Q9Z1Z2|STRAP_MOUSE Serine-threonine kinase receptor-associated protein OS=Mus musculus OX=10090 GN=Strap PE=1 SV=2	-0.0601238	0.154393	-0.0214467	0.586457	0.0386771	0.00308035	0.937027	0.0417574	0.303883
STE20-related kinase adapter protein beta	Stradb	NO	sp|Q8K4T3|STRAB_MOUSE STE20-related kinase adapter protein beta OS=Mus musculus OX=10090 GN=Stradb PE=2 SV=1;tr|M0QWE6|M0QWE6_MOUSE STE20-related kinase adapter protein beta (Fragment) OS=Mus musculus OX=10090 GN=Stradb PE=4 SV=1	-0.034163	0.597897	-0.0784852	0.245276	-0.0443223	-0.0813476	0.230146	-0.12567	0.0820779
STE20-related kinase adapter protein alpha	Strada	YES	sp|Q3UUJ4|STRAA_MOUSE STE20-related kinase adapter protein alpha OS=Mus musculus OX=10090 GN=Strada PE=1 SV=1	0.144599	0.00212783	-0.0567202	0.104496	-0.201319	0.113129	0.00757238	-0.0881898	0.0231631
Stonin-2	Ston2	NO	sp|Q8BZ60|STON2_MOUSE Stonin-2 OS=Mus musculus OX=10090 GN=Ston2 PE=1 SV=1;tr|E9PXP7|E9PXP7_MOUSE Stonin-2 OS=Mus musculus OX=10090 GN=Ston2 PE=1 SV=1	-0.109222	0.0175654	-0.105814	0.0201087	0.00340784	-0.0313811	0.402766	-0.0279732	0.453346
Stomatin-like protein 2, mitochondrial	Stoml2	YES	sp|Q99JB2|STML2_MOUSE Stomatin-like protein 2, mitochondrial OS=Mus musculus OX=10090 GN=Stoml2 PE=1 SV=1;tr|A2AG39|A2AG39_MOUSE Stomatin-like protein 2, mitochondrial (Fragment) OS=Mus musculus OX=10090 GN=Stoml2 PE=1 SV=1;tr|F6WI02|F6WI02_MOUSE Stomatin-	0.000529051	0.991003	0.0456325	0.347314	0.0451035	0.218667	0.00196694	0.263771	0.00067655
Erythrocyte band 7 integral membrane protein	Stom	NO	sp|P54116|STOM_MOUSE Erythrocyte band 7 integral membrane protein OS=Mus musculus OX=10090 GN=Stom PE=1 SV=3	-0.0487267	0.47813	-0.200739	0.0178881	-0.152012	0.127267	0.0915892	-0.0247455	0.714807
Stathmin-2	Stmn2	NO	sp|P55821|STMN2_MOUSE Stathmin-2 OS=Mus musculus OX=10090 GN=Stmn2 PE=1 SV=1	-0.175402	0.125139	0.52461	0.00128047	0.700012	-1.75914	5.61629e-07	-1.05913	1.66323e-05
Stathmin	Stmn1	NO	tr|D3Z1Z8|D3Z1Z8_MOUSE Stathmin (Fragment) OS=Mus musculus OX=10090 GN=Stmn1 PE=1 SV=1;tr|D3Z5N2|D3Z5N2_MOUSE Stathmin OS=Mus musculus OX=10090 GN=Stmn1 PE=1 SV=1;sp|P54227|STMN1_MOUSE Stathmin OS=Mus musculus OX=10090 GN=Stmn1 PE=1 SV=2	-0.0941059	0.0639154	0.0612881	0.194967	0.155394	-0.635802	1.67097e-06	-0.480408	1.08104e-05
Serine/threonine kinase-like domain-containing protein STKLD1	Stkld1	NO	tr|B0R044|B0R044_MOUSE Serine/threonine kinase-like domain-containing protein STKLD1 (Fragment) OS=Mus musculus OX=10090 GN=Stkld1 PE=4 SV=1;sp|Q80YS9|STKL1_MOUSE Serine/threonine kinase-like domain-containing protein STKLD1 OS=Mus musculus OX=10090 GN=Stk	-0.496208	0.299522	0.145291	0.752346	0.641499	-0.591927	0.223293	0.0495714	0.913976
Serine/threonine-protein kinase 4;Serine/threonine-protein kinase 4 37kDa subunit;Serine/threonine-protein kinase 4 18kDa subunit	Stk4	YES	sp|Q9JI11|STK4_MOUSE Serine/threonine-protein kinase 4 OS=Mus musculus OX=10090 GN=Stk4 PE=1 SV=1	-0.050335	0.0960197	-0.0223306	0.42147	0.0280045	-0.0966333	0.00786021	-0.0686289	0.0345077
Serine/threonine-protein kinase 38-like	Stk38l	YES	sp|Q7TSE6|ST38L_MOUSE Serine/threonine-protein kinase 38-like OS=Mus musculus OX=10090 GN=Stk38l PE=1 SV=2	0.0833145	0.0153219	0.0165564	0.545233	-0.0667582	0.144837	0.000886434	0.0780786	0.0202692
Serine/threonine-protein kinase 38	Stk38	NO	sp|Q91VJ4|STK38_MOUSE Serine/threonine-protein kinase 38 OS=Mus musculus OX=10090 GN=Stk38 PE=1 SV=1	-0.023473	0.413621	-0.127532	0.0022212	-0.104059	0.0694947	0.0371521	-0.0345644	0.241597
Serine/threonine-protein kinase 3;Serine/threonine-protein kinase 3 36kDa subunit;Serine/threonine-protein kinase 3 20kDa subunit	Stk3	YES	sp|Q9JI10|STK3_MOUSE Serine/threonine-protein kinase 3 OS=Mus musculus OX=10090 GN=Stk3 PE=1 SV=1;tr|A0A2I3BQE0|A0A2I3BQE0_MOUSE Serine/threonine-protein kinase 3 OS=Mus musculus OX=10090 GN=Stk3 PE=1 SV=1	0.138923	0.00817988	-0.022446	0.572372	-0.161369	-0.198953	0.00123413	-0.360323	3.23385e-05
Serine/threonine-protein kinase 26	Stk26	NO	tr|A2AD84|A2AD84_MOUSE Serine/threonine-protein kinase 26 OS=Mus musculus OX=10090 GN=Stk26 PE=1 SV=1;sp|Q99JT2|STK26_MOUSE Serine/threonine-protein kinase 26 OS=Mus musculus OX=10090 GN=Stk26 PE=1 SV=1	0.194785	0.00859026	0.165263	0.0181153	-0.0295222	-0.102861	0.0973187	-0.132384	0.0434581
Serine/threonine-protein kinase 25	Stk25	YES	sp|Q9Z2W1|STK25_MOUSE Serine/threonine-protein kinase 25 OS=Mus musculus OX=10090 GN=Stk25 PE=1 SV=2;tr|D3Z359|D3Z359_MOUSE Serine/threonine-protein kinase 25 (Fragment) OS=Mus musculus OX=10090 GN=Stk25 PE=1 SV=1	0.0645348	0.192675	0.115101	0.0371889	0.0505662	-0.097902	0.065214	-0.0473358	0.325332
Serine/threonine-protein kinase 24;Serine/threonine-protein kinase 24 35 kDa subunit;Serine/threonine-protein kinase 24 12 kDa subunit	Stk24	YES	sp|Q99KH8|STK24_MOUSE Serine/threonine-protein kinase 24 OS=Mus musculus OX=10090 GN=Stk24 PE=1 SV=1	-0.0588012	0.101167	-0.0215578	0.510882	0.0372433	-0.0181135	0.578838	0.0191299	0.558248
Serine/threonine-protein kinase 17B	Stk17b	YES	sp|Q8BG48|ST17B_MOUSE Serine/threonine-protein kinase 17B OS=Mus musculus OX=10090 GN=Stk17b PE=1 SV=1	0.229064	9.38866e-05	0.0707558	0.0422028	-0.158309	-0.46799	8.52129e-07	-0.626299	1.17767e-07
Serine/threonine-protein kinase 16	Stk16	NO	sp|O88697|STK16_MOUSE Serine/threonine-protein kinase 16 OS=Mus musculus OX=10090 GN=Stk16 PE=1 SV=3;tr|A0A087WQT0|A0A087WQT0_MOUSE Serine/threonine-protein kinase 16 (Fragment) OS=Mus musculus OX=10090 GN=Stk16 PE=1 SV=1;tr|Q05DP1|Q05DP1_MOUSE Serine/thre	-0.0427947	0.278005	-0.0301444	0.434624	0.0126504	-0.0187901	0.621315	-0.00613977	0.870699
Serine/threonine-protein kinase STK11	Stk11	NO	sp|Q9WTK7|STK11_MOUSE Serine/threonine-protein kinase STK11 OS=Mus musculus OX=10090 GN=Stk11 PE=1 SV=1;tr|E9Q811|E9Q811_MOUSE Serine/threonine-protein kinase STK11 OS=Mus musculus OX=10090 GN=Stk11 PE=1 SV=1	0.0314008	0.624909	-0.0895046	0.188723	-0.120905	-0.310233	0.00153255	-0.431139	0.00022021
Serine/threonine-protein kinase 10	Stk10	NO	sp|O55098|STK10_MOUSE Serine/threonine-protein kinase 10 OS=Mus musculus OX=10090 GN=Stk10 PE=1 SV=2	0.0275812	0.404597	0.14829	0.00210532	0.120709	-0.231999	0.000150855	-0.11129	0.00915935
Stress-induced-phosphoprotein 1	Stip1	NO	sp|Q60864|STIP1_MOUSE Stress-induced-phosphoprotein 1 OS=Mus musculus OX=10090 GN=Stip1 PE=1 SV=1	-0.10101	0.0160816	-0.126153	0.00565441	-0.0251426	0.00870418	0.792991	-0.0164384	0.6225
Stromal interaction molecule 2	Stim2	YES	tr|I1E4X8|I1E4X8_MOUSE Stromal interaction molecule 2 OS=Mus musculus OX=10090 GN=Stim2 PE=1 SV=1;sp|P83093|STIM2_MOUSE Stromal interaction molecule 2 OS=Mus musculus OX=10090 GN=Stim2 PE=1 SV=2;tr|F6WBP9|F6WBP9_MOUSE Stromal interaction molecule 2 (Fragme	-0.0810626	0.064997	-0.0642727	0.126348	0.0167899	-0.134377	0.00854984	-0.117587	0.0157741
Stromal interaction molecule 1	Stim1	NO	sp|P70302|STIM1_MOUSE Stromal interaction molecule 1 OS=Mus musculus OX=10090 GN=Stim1 PE=1 SV=2;tr|A0A1B0GRA5|A0A1B0GRA5_MOUSE Stromal interaction molecule 1 OS=Mus musculus OX=10090 GN=Stim1 PE=1 SV=1;tr|A0A1B0GR78|A0A1B0GR78_MOUSE Stromal interaction mo	-0.0884729	0.0331827	-0.0820042	0.0439565	0.00646871	-0.262821	0.000107431	-0.256353	0.000125628
Metalloreductase STEAP3	Steap3	NO	tr|D3YTP0|D3YTP0_MOUSE Metalloreductase STEAP3 (Fragment) OS=Mus musculus OX=10090 GN=Steap3 PE=1 SV=8;tr|A0A0R4J1G9|A0A0R4J1G9_MOUSE Metalloreductase STEAP3 OS=Mus musculus OX=10090 GN=Steap3 PE=1 SV=1;tr|E9QN92|E9QN92_MOUSE Metalloreductase STEAP3 OS=Mus	0.179796	0.067698	0.192351	0.0542386	0.0125557	-0.265438	0.0154397	-0.252882	0.0190451
Signal transducer and transcription activator 6	Stat6	YES	sp|P52633|STAT6_MOUSE Signal transducer and transcription activator 6 OS=Mus musculus OX=10090 GN=Stat6 PE=1 SV=2	-0.0807751	0.12006	-0.0457294	0.349327	0.0350457	0.00917471	0.846191	0.0442204	0.364455
Signal transducer and activator of transcription 5B	Stat5b	YES	sp|P42232|STA5B_MOUSE Signal transducer and activator of transcription 5B OS=Mus musculus OX=10090 GN=Stat5b PE=1 SV=1	0.0702339	0.381914	0.125263	0.140357	0.055029	-0.100387	0.224306	-0.0453582	0.565754
Signal transducer and activator of transcription 5A;Signal transducer and activator of transcription	Stat5a	YES	sp|P42230|STA5A_MOUSE Signal transducer and activator of transcription 5A OS=Mus musculus OX=10090 GN=Stat5a PE=1 SV=1;tr|B2C3G8|B2C3G8_MOUSE Signal transducer and activator of transcription OS=Mus musculus OX=10090 GN=Stat5a PE=1 SV=1	0.174664	0.00175478	0.147247	0.00437532	-0.0274171	0.0215793	0.561751	-0.0058378	0.873773
Signal transducer and activator of transcription 3;Signal transducer and activator of transcription	Stat3	NO	sp|P42227|STAT3_MOUSE Signal transducer and activator of transcription 3 OS=Mus musculus OX=10090 GN=Stat3 PE=1 SV=2;tr|B7ZC18|B7ZC18_MOUSE Signal transducer and activator of transcription OS=Mus musculus OX=10090 GN=Stat3 PE=1 SV=1	-0.128013	0.00102204	-0.0126539	0.608389	0.115359	-0.0919459	0.00606128	0.0234131	0.354282
Signal transducer and activator of transcription;Signal transducer and activator of transcription 2	Stat2	YES	tr|Q9QXJ2|Q9QXJ2_MOUSE Signal transducer and activator of transcription OS=Mus musculus OX=10090 GN=Stat2 PE=1 SV=1;tr|E9QJX9|E9QJX9_MOUSE Signal transducer and activator of transcription OS=Mus musculus OX=10090 GN=Stat2 PE=1 SV=2;sp|Q9WVL2|STAT2_MOUSE Si	-0.0151441	0.685102	-0.0317658	0.404688	-0.0166217	0.0747685	0.0756352	0.0581468	0.148885
Signal transducer and activator of transcription	Stat1	YES	tr|Q99K94|Q99K94_MOUSE Signal transducer and activator of transcription OS=Mus musculus OX=10090 GN=Stat1 PE=1 SV=1	-0.15978	0.000418602	-0.0974821	0.00640871	0.0622977	-0.0393874	0.16381	0.0229103	0.395383
Signal transducer and activator of transcription;Signal transducer and activator of transcription 1	Stat1	YES	tr|Q8C3V4|Q8C3V4_MOUSE Signal transducer and activator of transcription OS=Mus musculus OX=10090 GN=Stat1 PE=1 SV=1;tr|A0A087WSP5|A0A087WSP5_MOUSE Signal transducer and activator of transcription OS=Mus musculus OX=10090 GN=Stat1 PE=1 SV=1;sp|P42225|STAT1_	-0.12292	0.265086	0.16578	0.146522	0.2887	-0.0748368	0.484645	0.213863	0.073323
StAR-related lipid transfer protein 4	Stard4	YES	tr|Q80SX0|Q80SX0_MOUSE StAR-related lipid transfer protein 4 OS=Mus musculus OX=10090 GN=Stard4 PE=1 SV=1;sp|Q99JV5|STAR4_MOUSE StAR-related lipid transfer protein 4 OS=Mus musculus OX=10090 GN=Stard4 PE=1 SV=1	0.287299	0.00018212	0.126579	0.0155244	-0.16072	0.0970167	0.0448233	-0.0637029	0.152874
MLN64 N-terminal domain homolog	Stard3nl	NO	tr|A0A0G2JE93|A0A0G2JE93_MOUSE STARD3 N-terminal-like protein OS=Mus musculus OX=10090 GN=Stard3nl PE=1 SV=1;tr|A0A1Y7VJA7|A0A1Y7VJA7_MOUSE STARD3 N-terminal-like protein OS=Mus musculus OX=10090 GN=Stard3nl PE=1 SV=1;sp|Q9DCI3|STR3N_MOUSE STARD3 N-termina	0.518882	0.077657	-0.28922	0.286764	-0.808102	0.271514	0.314915	-0.536587	0.0700025
StAR-related lipid transfer protein 3	Stard3	NO	sp|Q61542|STAR3_MOUSE StAR-related lipid transfer protein 3 OS=Mus musculus OX=10090 GN=Stard3 PE=1 SV=1	-0.145983	0.0877164	-0.229456	0.0170262	-0.0834728	0.0478523	0.535731	-0.0356205	0.642653
PCTP-like protein	Stard10	NO	tr|E9PVP0|E9PVP0_MOUSE START domain-containing protein 10 OS=Mus musculus OX=10090 GN=Stard10 PE=1 SV=1;sp|Q9JMD3|STA10_MOUSE START domain-containing protein 10 OS=Mus musculus OX=10090 GN=Stard10 PE=1 SV=1;tr|G3UW37|G3UW37_MOUSE START domain-containing pr	0.182984	0.00417623	-0.0357108	0.440178	-0.218695	0.0643861	0.183893	-0.154309	0.00969672
Signal-transducing adaptor protein 1	Stap1	NO	sp|Q9JM90|STAP1_MOUSE Signal-transducing adaptor protein 1 OS=Mus musculus OX=10090 GN=Stap1 PE=1 SV=1;tr|A0A0H2UKC0|A0A0H2UKC0_MOUSE Signal-transducing adaptor protein 1 OS=Mus musculus OX=10090 GN=Stap1 PE=1 SV=1	0.0820156	0.293695	-0.103486	0.195297	-0.185502	0.0593476	0.438381	-0.126154	0.124544
STAM-binding protein	Stambp	NO	sp|Q9CQ26|STABP_MOUSE STAM-binding protein OS=Mus musculus OX=10090 GN=Stambp PE=1 SV=1	-0.05989	0.103583	-0.0645171	0.0837784	-0.00462712	-0.0871587	0.0298155	-0.0917858	0.0242501
Signal transducing adapter molecule 2	Stam2	YES	sp|O88811|STAM2_MOUSE Signal transducing adapter molecule 2 OS=Mus musculus OX=10090 GN=Stam2 PE=1 SV=1	0.136043	0.00700274	0.085063	0.0502462	-0.0509797	-0.0576934	0.152912	-0.108673	0.0195639
Signal transducing adapter molecule 1	Stam	YES	tr|Q3UGN9|Q3UGN9_MOUSE Signal transducing adapter molecule 1 OS=Mus musculus OX=10090 GN=Stam PE=1 SV=1;sp|P70297|STAM1_MOUSE Signal transducing adapter molecule 1 OS=Mus musculus OX=10090 GN=Stam PE=1 SV=3;tr|A2ARJ0|A2ARJ0_MOUSE Signal transducing adapter	-0.00680771	0.887933	0.0878354	0.101766	0.0946431	-0.340979	0.00017013	-0.246336	0.00118398
Suppressor of tumorigenicity 7 protein	St7	YES	tr|D3YUM7|D3YUM7_MOUSE Suppressor of tumorigenicity 7 protein OS=Mus musculus OX=10090 GN=St7 PE=1 SV=1;sp|Q99M96|ST7_MOUSE Suppressor of tumorigenicity 7 protein OS=Mus musculus OX=10090 GN=St7 PE=2 SV=1	0.210342	0.00371278	0.05833	0.273237	-0.152012	0.294434	0.000565645	0.142423	0.0231195
Type 2 lactosamine alpha-2,3-sialyltransferase	St3gal6	YES	sp|Q8VIB3|SIA10_MOUSE Type 2 lactosamine alpha-2,3-sialyltransferase OS=Mus musculus OX=10090 GN=St3gal6 PE=2 SV=3	0.181874	0.00282373	0.309439	0.000125355	0.127565	-0.0839163	0.0759855	0.043649	0.314398
CMP-N-acetylneuraminate-beta-galactosamide-alpha-2,3-sialyltransferase 2	St3gal2	NO	sp|Q11204|SIA4B_MOUSE CMP-N-acetylneuraminate-beta-galactosamide-alpha-2,3-sialyltransferase 2 OS=Mus musculus OX=10090 GN=St3gal2 PE=1 SV=2;tr|D3Z3V2|D3Z3V2_MOUSE CMP-N-acetylneuraminate-beta-galactosamide-alpha-2,3-sialyltransferase 2 OS=Mus musculus OX=	-0.00864076	0.78842	0.168219	0.00101883	0.17686	-0.308631	2.39069e-05	-0.131771	0.00388691
CMP-N-acetylneuraminate-beta-galactosamide-alpha-2,3-sialyltransferase 1	St3gal1	YES	sp|P54751|SIA4A_MOUSE CMP-N-acetylneuraminate-beta-galactosamide-alpha-2,3-sialyltransferase 1 OS=Mus musculus OX=10090 GN=St3gal1 PE=1 SV=1	0.0892359	0.0358591	0.0121096	0.734781	-0.0771263	0.148814	0.00352385	0.0716879	0.0756794
Hsc70-interacting protein	St13	YES	sp|Q99L47|F10A1_MOUSE Hsc70-interacting protein OS=Mus musculus OX=10090 GN=St13 PE=1 SV=1;tr|F8WJK8|F8WJK8_MOUSE Hsc70-interacting protein OS=Mus musculus OX=10090 GN=St13 PE=1 SV=1	-0.103779	0.00951299	-0.136611	0.00235002	-0.0328317	0.0218919	0.478313	-0.0109398	0.719244
Afadin- and alpha-actinin-binding protein	Ssx2ip	NO	tr|A0A0R4J1A9|A0A0R4J1A9_MOUSE Afadin- and alpha-actinin-binding protein OS=Mus musculus OX=10090 GN=Ssx2ip PE=1 SV=1;sp|Q8VC66|ADIP_MOUSE Afadin- and alpha-actinin-binding protein OS=Mus musculus OX=10090 GN=Ssx2ip PE=1 SV=1	-0.0213311	0.697535	-0.0617698	0.279437	-0.0404387	-0.128205	0.0454891	-0.168644	0.0152511
Translocon-associated protein subunit delta	Ssr4	NO	tr|Q9D8L3|Q9D8L3_MOUSE Signal sequence receptor, delta OS=Mus musculus OX=10090 GN=Ssr4 PE=1 SV=1;sp|Q62186|SSRD_MOUSE Translocon-associated protein subunit delta OS=Mus musculus OX=10090 GN=Ssr4 PE=1 SV=1	0.263602	0.000658742	0.0142829	0.760436	-0.249319	0.280112	0.000459575	0.0307925	0.516297
Translocon-associated protein subunit gamma	Ssr3	YES	sp|Q9DCF9|SSRG_MOUSE Translocon-associated protein subunit gamma OS=Mus musculus OX=10090 GN=Ssr3 PE=1 SV=1	0.115842	0.0162845	0.0655367	0.117861	-0.0503056	0.18778	0.00142996	0.137474	0.00738117
Translocon-associated protein subunit alpha	Ssr1	YES	sp|Q9CY50|SSRA_MOUSE Translocon-associated protein subunit alpha OS=Mus musculus OX=10090 GN=Ssr1 PE=1 SV=1;tr|A0A286YCT4|A0A286YCT4_MOUSE Translocon-associated protein subunit alpha OS=Mus musculus OX=10090 GN=Ssr1 PE=1 SV=1;tr|A0A286YCG8|A0A286YCG8_MOUSE	0.266913	0.00490946	0.155248	0.0504552	-0.111666	0.135238	0.078896	0.0235724	0.730269
Protein phosphatase Slingshot homolog 3	Ssh3	NO	sp|Q8K330|SSH3_MOUSE Protein phosphatase Slingshot homolog 3 OS=Mus musculus OX=10090 GN=Ssh3 PE=1 SV=1	-0.0470945	0.533175	-0.0848962	0.276214	-0.0378017	-0.0215648	0.772787	-0.0593666	0.436029
Protein phosphatase Slingshot homolog 2	Ssh2	YES	tr|A0A0R4J2A0|A0A0R4J2A0_MOUSE Protein phosphatase Slingshot homolog 2 OS=Mus musculus OX=10090 GN=Ssh2 PE=1 SV=1;sp|Q5SW75|SSH2_MOUSE Protein phosphatase Slingshot homolog 2 OS=Mus musculus OX=10090 GN=Ssh2 PE=1 SV=2	0.0407206	0.610873	0.0424963	0.595729	0.00177566	-0.426202	0.000875132	-0.424426	0.000896525
Protein phosphatase Slingshot homolog 1	Ssh1	YES	tr|F8WHT2|F8WHT2_MOUSE Protein phosphatase Slingshot homolog 1 OS=Mus musculus OX=10090 GN=Ssh1 PE=1 SV=1;sp|Q76I79|SSH1_MOUSE Protein phosphatase Slingshot homolog 1 OS=Mus musculus OX=10090 GN=Ssh1 PE=1 SV=1	-0.0135629	0.811066	-0.0402036	0.485826	-0.0266407	0.0414728	0.472678	0.0148321	0.793853
Sperm-specific antigen 2 homolog	Ssfa2	NO	tr|A2AQD5|A2AQD5_MOUSE Sperm-specific antigen 2 homolog OS=Mus musculus OX=10090 GN=Ssfa2 PE=1 SV=1;sp|Q922B9|SSFA2_MOUSE Sperm-specific antigen 2 homolog OS=Mus musculus OX=10090 GN=Ssfa2 PE=1 SV=3;tr|A2AQD6|A2AQD6_MOUSE Sperm-specific antigen 2 homolog O	-0.0154163	0.648235	0.34846	1.43289e-05	0.363876	-0.608173	3.43965e-07	-0.244297	0.000140083
Single-stranded DNA-binding protein;Single-stranded DNA-binding protein, mitochondrial	Ssbp1	YES	tr|Q8R2K3|Q8R2K3_MOUSE Single-stranded DNA binding protein 1 OS=Mus musculus OX=10090 GN=Ssbp1 PE=1 SV=1;sp|Q9CYR0|SSBP_MOUSE Single-stranded DNA-binding protein, mitochondrial OS=Mus musculus OX=10090 GN=Ssbp1 PE=1 SV=1	0.121761	0.0920376	0.276505	0.00310761	0.154745	0.0625859	0.34884	0.21733	0.0103513
Sulfiredoxin-1	Srxn1	NO	tr|A2AQU8|A2AQU8_MOUSE Sulfiredoxin OS=Mus musculus OX=10090 GN=Srxn1 PE=1 SV=1;sp|Q9D975|SRXN1_MOUSE Sulfiredoxin-1 OS=Mus musculus OX=10090 GN=Srxn1 PE=2 SV=1	0.048471	0.487769	-0.0511997	0.464535	-0.0996708	0.178851	0.0308436	0.0791802	0.270711
Serine/arginine-rich splicing factor 9	Srsf9	YES	sp|Q9D0B0|SRSF9_MOUSE Serine/arginine-rich splicing factor 9 OS=Mus musculus OX=10090 GN=Srsf9 PE=1 SV=1;tr|F6RTE1|F6RTE1_MOUSE Serine/arginine-rich-splicing factor 9 (Fragment) OS=Mus musculus OX=10090 GN=Srsf9 PE=1 SV=1	-0.0046346	0.954281	0.247469	0.0158954	0.252103	-0.304522	0.00600845	-0.0524191	0.523213
Serine/arginine-rich splicing factor 3	Srsf3	NO	sp|P84104|SRSF3_MOUSE Serine/arginine-rich splicing factor 3 OS=Mus musculus OX=10090 GN=Srsf3 PE=1 SV=1	0.23261	0.775007	0.789065	0.347283	0.556455	-0.0365857	0.964032	0.519869	0.528006
Serine/arginine-rich splicing factor 1	Srsf1	YES	tr|H7BX95|H7BX95_MOUSE Serine/arginine-rich-splicing factor 1 OS=Mus musculus OX=10090 GN=Srsf1 PE=1 SV=1;sp|Q6PDM2|SRSF1_MOUSE Serine/arginine-rich splicing factor 1 OS=Mus musculus OX=10090 GN=Srsf1 PE=1 SV=3	-0.118075	0.179933	-0.114543	0.191651	0.00353248	0.0906347	0.290275	0.0941672	0.27342
Serine racemase	Srr	NO	sp|Q9QZX7|SRR_MOUSE Serine racemase OS=Mus musculus OX=10090 GN=Srr PE=1 SV=1	-0.0749536	0.443476	-0.183954	0.0868432	-0.109	0.326847	0.0096256	0.217846	0.050653
Signal recognition particle receptor subunit alpha	Srpr	NO	sp|Q9DBG7|SRPRA_MOUSE Signal recognition particle receptor subunit alpha OS=Mus musculus OX=10090 GN=Srpra PE=1 SV=1	0.0848859	0.019606	0.116247	0.00447456	0.0313612	-0.204114	0.000178032	-0.172753	0.000491119
Signal recognition particle 9 kDa protein	Srp9	NO	sp|P49962|SRP09_MOUSE Signal recognition particle 9 kDa protein OS=Mus musculus OX=10090 GN=Srp9 PE=1 SV=2;tr|D3YZX8|D3YZX8_MOUSE Signal recognition particle 9 kDa protein OS=Mus musculus OX=10090 GN=Srp9 PE=1 SV=1	-0.00744012	0.930071	0.0190744	0.822282	0.0265145	0.020587	0.808513	0.0471016	0.582803
Signal recognition particle subunit SRP72	Srp72	NO	tr|F8VQC1|F8VQC1_MOUSE Signal recognition particle subunit SRP72 OS=Mus musculus OX=10090 GN=Srp72 PE=1 SV=1;tr|E9Q740|E9Q740_MOUSE Signal recognition particle subunit SRP72 OS=Mus musculus OX=10090 GN=Srp72 PE=1 SV=1	-0.068652	0.0706605	-0.0268517	0.431596	0.0418003	-0.123539	0.00651964	-0.0817384	0.0389726
Signal recognition particle subunit SRP68	Srp68	NO	sp|Q8BMA6|SRP68_MOUSE Signal recognition particle subunit SRP68 OS=Mus musculus OX=10090 GN=Srp68 PE=1 SV=2;tr|A2AAN2|A2AAN2_MOUSE Signal recognition particle subunit SRP68 OS=Mus musculus OX=10090 GN=Srp68 PE=1 SV=1	-0.145898	0.00423806	0.0269903	0.464567	0.172888	-0.0733244	0.0740873	0.0995635	0.0248487
Signal recognition particle 54 kDa protein	Srp54c;Srp54	NO	tr|E9PXC0|E9PXC0_MOUSE Signal recognition particle 54 kDa protein OS=Mus musculus OX=10090 GN=Srp54c PE=1 SV=1;sp|P14576|SRP54_MOUSE Signal recognition particle 54 kDa protein OS=Mus musculus OX=10090 GN=Srp54 PE=1 SV=2	-0.122202	0.00446199	0.0909366	0.0180454	0.213138	-0.193371	0.000335674	0.0197676	0.524554
Signal recognition particle 19 kDa protein	Srp19	NO	tr|Q9D104|Q9D104_MOUSE Signal recognition particle 19 kDa protein OS=Mus musculus OX=10090 GN=Srp19 PE=1 SV=1;tr|D6RHP8|D6RHP8_MOUSE Signal recognition particle 19 kDa protein OS=Mus musculus OX=10090 GN=Srp19 PE=1 SV=1;tr|G5E8T3|G5E8T3_MOUSE Signal recogn	-0.0665115	0.214338	-0.0276795	0.587345	0.0388321	-0.131149	0.0311961	-0.0923168	0.100075
Signal recognition particle 14 kDa protein;Signal recognition particle 14 kDa protein, N-terminally processed	Srp14	NO	sp|P16254|SRP14_MOUSE Signal recognition particle 14 kDa protein OS=Mus musculus OX=10090 GN=Srp14 PE=1 SV=1	0.0363655	0.644291	-0.056192	0.480431	-0.0925574	-0.0508995	0.521326	-0.143457	0.0992049
Spermidine synthase	Srm	NO	sp|Q64674|SPEE_MOUSE Spermidine synthase OS=Mus musculus OX=10090 GN=Srm PE=1 SV=1	-0.0187017	0.576955	-0.00659055	0.842532	0.0121111	0.021943	0.514626	0.0340541	0.322347
Sorcin	Sri	NO	sp|Q6P069|SORCN_MOUSE Sorcin OS=Mus musculus OX=10090 GN=Sri PE=1 SV=1	0.107899	0.0138133	0.140408	0.00384578	0.032508	-0.0731814	0.0621919	-0.0406733	0.257185
Serglycin	Srgn	YES	sp|P13609|SRGN_MOUSE Serglycin OS=Mus musculus OX=10090 GN=Srgn PE=1 SV=1	0.224328	0.0329422	-0.0705576	0.431053	-0.294885	-2.28759	2.83893e-08	-2.58247	1.2361e-08
SLIT-ROBO Rho GTPase-activating protein 3	Srgap3	NO	tr|F8VPQ4|F8VPQ4_MOUSE SLIT-ROBO Rho GTPase-activating protein 3 OS=Mus musculus OX=10090 GN=Srgap3 PE=1 SV=1;sp|Q812A2|SRGP3_MOUSE SLIT-ROBO Rho GTPase-activating protein 3 OS=Mus musculus OX=10090 GN=Srgap3 PE=1 SV=1;tr|E9QN14|E9QN14_MOUSE SLIT-ROBO Rho	-0.127426	0.00546614	-0.130316	0.00487974	-0.00288949	-0.0275716	0.417993	-0.0304611	0.373446
SLIT-ROBO Rho GTPase-activating protein 2	Srgap2	NO	sp|Q91Z67|SRGP2_MOUSE SLIT-ROBO Rho GTPase-activating protein 2 OS=Mus musculus OX=10090 GN=Srgap2 PE=1 SV=2;tr|A0A087WNM1|A0A087WNM1_MOUSE SLIT-ROBO Rho GTPase-activating protein 2 OS=Mus musculus OX=10090 GN=Srgap2 PE=1 SV=1;tr|A0A087WSQ1|A0A087WSQ1_MOUS	0.0128941	0.676864	-0.0347392	0.280087	-0.0476333	-0.0798885	0.0312566	-0.127522	0.0036702
Polyprenol reductase	Srd5a3	YES	sp|Q9WUP4|PORED_MOUSE Polyprenol reductase OS=Mus musculus OX=10090 GN=Srd5a3 PE=1 SV=2;tr|F6WPW1|F6WPW1_MOUSE Polyprenol reductase OS=Mus musculus OX=10090 GN=Srd5a3 PE=1 SV=1	0.106335	0.0962342	0.103064	0.104943	-0.00327125	0.19595	0.00959329	0.192679	0.0103813
Steroid receptor RNA activator 1	Sra1	NO	tr|G3X8R2|G3X8R2_MOUSE Steroid receptor RNA activator 1 (Fragment) OS=Mus musculus OX=10090 GN=Sra1 PE=1 SV=1;sp|Q80VJ2|SRA1_MOUSE Steroid receptor RNA activator 1 OS=Mus musculus OX=10090 GN=Sra1 PE=1 SV=3	-0.107449	0.231738	0.0896926	0.310467	0.197141	-0.30431	0.00770467	-0.107169	0.232832
Sequestosome-1	Sqstm1	NO	sp|Q64337|SQSTM_MOUSE Sequestosome-1 OS=Mus musculus OX=10090 GN=Sqstm1 PE=1 SV=1;tr|D3YZJ1|D3YZJ1_MOUSE Sequestosome-1 OS=Mus musculus OX=10090 GN=Sqstm1 PE=1 SV=1	-0.0604444	0.335927	0.0667051	0.291794	0.12715	-0.252852	0.00356376	-0.125702	0.0690739
Sulfide:quinone oxidoreductase, mitochondrial	Sqrdl	NO	sp|Q9R112|SQOR_MOUSE Sulfide:quinone oxidoreductase, mitochondrial OS=Mus musculus OX=10090 GN=Sqor PE=1 SV=3;tr|F6ZKZ3|F6ZKZ3_MOUSE Sulfide:quinone oxidoreductase, mitochondrial OS=Mus musculus OX=10090 GN=Sqor PE=1 SV=1	0.0148297	0.603391	0.124749	0.00263704	0.10992	0.129449	0.00215799	0.239369	5.39645e-05
Protein SPT2 homolog	Spty2d1	YES	sp|Q68FG3|SPT2_MOUSE Protein SPT2 homolog OS=Mus musculus OX=10090 GN=Spty2d1 PE=2 SV=1	-0.139565	0.414083	0.126361	0.457609	0.265926	-0.871071	0.00102803	-0.605145	0.00717951
Serine palmitoyltransferase 2	Sptlc2	YES	sp|P97363|SPTC2_MOUSE Serine palmitoyltransferase 2 OS=Mus musculus OX=10090 GN=Sptlc2 PE=1 SV=2	0.0253432	0.489562	0.0311895	0.399376	0.00584628	0.0846087	0.0454632	0.090455	0.035604
Serine palmitoyltransferase 1	Sptlc1	YES	sp|O35704|SPTC1_MOUSE Serine palmitoyltransferase 1 OS=Mus musculus OX=10090 GN=Sptlc1 PE=1 SV=2	0.012501	0.752462	0.00888797	0.822242	-0.00361305	-0.123701	0.014359	-0.127314	0.0126151
Spectrin beta chain, non-erythrocytic 1	Sptbn1	YES	sp|Q62261|SPTB2_MOUSE Spectrin beta chain, non-erythrocytic 1 OS=Mus musculus OX=10090 GN=Sptbn1 PE=1 SV=2;tr|A0A0A0MQG2|A0A0A0MQG2_MOUSE Spectrin beta chain, non-erythrocytic 1 (Fragment) OS=Mus musculus OX=10090 GN=Sptbn1 PE=1 SV=1	-0.0655493	0.635197	-0.0359412	0.793548	0.0296081	-0.175103	0.227213	-0.145495	0.307683
Spectrin beta chain, erythrocytic	Sptb	YES	tr|Q3UGX2|Q3UGX2_MOUSE Spectrin beta chain OS=Mus musculus OX=10090 GN=Sptb PE=1 SV=1;tr|E9Q397|E9Q397_MOUSE Spectrin beta chain OS=Mus musculus OX=10090 GN=Sptb PE=1 SV=1;sp|P15508|SPTB1_MOUSE Spectrin beta chain, erythrocytic OS=Mus musculus OX=10090 GN=	0.297466	0.0126542	0.151079	0.134157	-0.146387	-0.336589	0.00706424	-0.482976	0.00102709
Spectrin alpha chain, non-erythrocytic 1	Sptan1	NO	sp|P16546|SPTN1_MOUSE Spectrin alpha chain, non-erythrocytic 1 OS=Mus musculus OX=10090 GN=Sptan1 PE=1 SV=4	-0.026604	0.846292	-0.0404298	0.768727	-0.0138258	-0.171923	0.235094	-0.185749	0.203299
	Sptan1	NO	tr|A3KGU5|A3KGU5_MOUSE Spectrin alpha chain, non-erythrocytic 1 OS=Mus musculus OX=10090 GN=Sptan1 PE=1 SV=1;tr|E9Q447|E9Q447_MOUSE Spectrin alpha chain, non-erythrocytic 1 OS=Mus musculus OX=10090 GN=Sptan1 PE=1 SV=1	0.0783761	0.632837	0.057798	0.723557	-0.0205781	-0.139011	0.405298	-0.159589	0.343267
	Sptan1	NO	tr|A3KGU7|A3KGU7_MOUSE Spectrin alpha chain, non-erythrocytic 1 OS=Mus musculus OX=10090 GN=Sptan1 PE=1 SV=1;tr|A3KGU9|A3KGU9_MOUSE Spectrin alpha chain, non-erythrocytic 1 OS=Mus musculus OX=10090 GN=Sptan1 PE=1 SV=2	-0.157292	0.2414	-0.0860655	0.506151	0.0712262	-0.146827	0.27109	-0.0756008	0.557717
Spectrin alpha chain, erythrocytic 1	Spta1	YES	sp|P08032|SPTA1_MOUSE Spectrin alpha chain, erythrocytic 1 OS=Mus musculus OX=10090 GN=Spta1 PE=1 SV=3	0.410885	0.00289048	0.111507	0.26199	-0.299378	-0.207325	0.0578956	-0.506703	0.000899665
SPRY domain-containing SOCS box protein 2	Spsb2	NO	sp|O88838|SPSB2_MOUSE SPRY domain-containing SOCS box protein 2 OS=Mus musculus OX=10090 GN=Spsb2 PE=1 SV=1;tr|D3YX10|D3YX10_MOUSE SPRY domain-containing SOCS box protein 2 (Fragment) OS=Mus musculus OX=10090 GN=Spsb2 PE=1 SV=1	0.224407	0.00547299	-0.0757902	0.221418	-0.300197	0.234658	0.00436009	-0.0655386	0.283734
SPRY domain-containing protein 7	Spryd7	NO	sp|Q3TFQ1|SPRY7_MOUSE SPRY domain-containing protein 7 OS=Mus musculus OX=10090 GN=Spryd7 PE=1 SV=2;tr|Q3UBW1|Q3UBW1_MOUSE SPRY domain-containing protein 7 OS=Mus musculus OX=10090 GN=Spryd7 PE=1 SV=1	0.0468751	0.42638	0.103919	0.103718	0.0570443	0.150988	0.0300623	0.208032	0.00733996
SPRY domain-containing protein 4	Spryd4	NO	sp|Q91WK1|SPRY4_MOUSE SPRY domain-containing protein 4 OS=Mus musculus OX=10090 GN=Spryd4 PE=1 SV=1	0.0209874	0.555123	0.0394283	0.282722	0.0184409	0.154874	0.00264533	0.173315	0.0014244
Protein sprouty homolog 1	Spry1	YES	sp|Q9QXV9|SPY1_MOUSE Protein sprouty homolog 1 OS=Mus musculus OX=10090 GN=Spry1 PE=2 SV=1	0.259561	0.00103163	0.348346	0.000177465	0.0887849	-0.58463	6.29398e-06	-0.495845	1.86319e-05
Sprouty-related, EVH1 domain-containing protein 2	Spred2	YES	tr|Q5SRF8|Q5SRF8_MOUSE Sprouty-related, EVH1 domain-containing protein 2 OS=Mus musculus OX=10090 GN=Spred2 PE=1 SV=1;sp|Q924S7|SPRE2_MOUSE Sprouty-related, EVH1 domain-containing protein 2 OS=Mus musculus OX=10090 GN=Spred2 PE=1 SV=1;tr|Q5SRF9|Q5SRF9_MOUS	0.212598	0.0274717	0.00557897	0.943813	-0.207019	-0.0721751	0.376315	-0.279194	0.00828827
Sepiapterin reductase	Spr	NO	tr|Q91XH5|Q91XH5_MOUSE Sepiapterin reductase OS=Mus musculus OX=10090 GN=Spr PE=1 SV=1;tr|G3UXX3|G3UXX3_MOUSE Sepiapterin reductase OS=Mus musculus OX=10090 GN=Spr PE=1 SV=1;sp|Q64105|SPRE_MOUSE Sepiapterin reductase OS=Mus musculus OX=10090 GN=Spr PE=1 SV	0.100009	0.0946844	0.0920391	0.118617	-0.0079699	0.0600298	0.28385	0.0520599	0.347619
Signal peptide peptidase-like 2B	Sppl2b	YES	sp|Q3TD49|SPP2B_MOUSE Signal peptide peptidase-like 2B OS=Mus musculus OX=10090 GN=Sppl2b PE=1 SV=2;tr|A0A1W2P794|A0A1W2P794_MOUSE Signal peptide peptidase-like 2B (Fragment) OS=Mus musculus OX=10090 GN=Sppl2b PE=1 SV=1	-0.133844	0.0746978	-0.333959	0.0012598	-0.200116	0.0737827	0.286041	-0.126333	0.0887844
Signal peptide peptidase-like 2A	Sppl2a	YES	sp|Q9JJF9|SPP2A_MOUSE Signal peptide peptidase-like 2A OS=Mus musculus OX=10090 GN=Sppl2a PE=1 SV=2	0.0735353	0.106836	0.0153509	0.710504	-0.0581844	-0.00206776	0.959916	-0.0602521	0.173269
Secreted phosphoprotein 24	Spp2	NO	sp|Q8K1I3|SPP24_MOUSE Secreted phosphoprotein 24 OS=Mus musculus OX=10090 GN=Spp2 PE=1 SV=2	-0.0688463	0.523727	-0.0619327	0.565112	0.00691355	0.167774	0.146348	0.174688	0.132769
Spondin-2	Spon2	NO	tr|A0A0J9YUZ7|A0A0J9YUZ7_MOUSE Spondin-2 (Fragment) OS=Mus musculus OX=10090 GN=Spon2 PE=1 SV=1;sp|Q8BMS2|SPON2_MOUSE Spondin-2 OS=Mus musculus OX=10090 GN=Spon2 PE=2 SV=2	0.0366099	0.548417	0.209309	0.00885663	0.172699	-1.90455	7.64697e-09	-1.73185	1.46859e-08
Protein spinster homolog 1	Spns1	NO	tr|D3YTR6|D3YTR6_MOUSE Protein spinster homolog 1 OS=Mus musculus OX=10090 GN=Spns1 PE=1 SV=1;sp|Q8R0G7|SPNS1_MOUSE Protein spinster homolog 1 OS=Mus musculus OX=10090 GN=Spns1 PE=2 SV=1;tr|D3YWA9|D3YWA9_MOUSE Protein spinster homolog 1 OS=Mus musculus OX=	0.00136257	0.988767	-0.066314	0.500737	-0.0676766	0.240784	0.0369213	0.173107	0.106641
Leukosialin	Spn	NO	tr|A0A0U1RNN5|A0A0U1RNN5_MOUSE Leukosialin (Fragment) OS=Mus musculus OX=10090 GN=Spn PE=1 SV=1;sp|P15702|LEUK_MOUSE Leukosialin OS=Mus musculus OX=10090 GN=Spn PE=1 SV=1	0.219095	0.0084833	-0.11561	0.0968132	-0.334705	0.23638	0.00585091	-0.0983245	0.146982
Sphingosine kinase 2	Sphk2	NO	sp|Q9JIA7|SPHK2_MOUSE Sphingosine kinase 2 OS=Mus musculus OX=10090 GN=Sphk2 PE=1 SV=2	0.0436459	0.159119	-0.114888	0.0043991	-0.158534	0.179467	0.000356895	0.0209337	0.474132
Sphingosine kinase 1	Sphk1	NO	sp|Q8CI15|SPHK1_MOUSE Sphingosine kinase 1 OS=Mus musculus OX=10090 GN=Sphk1 PE=1 SV=1;tr|B1AT89|B1AT89_MOUSE Sphingosine kinase 1 (Fragment) OS=Mus musculus OX=10090 GN=Sphk1 PE=1 SV=1;tr|B1AT85|B1AT85_MOUSE Sphingosine kinase 1 (Fragment) OS=Mus musculus	0.350819	0.00451134	0.00471591	0.95726	-0.346103	0.0149721	0.86503	-0.331131	0.00604077
Paraplegin	Spg7	NO	sp|Q3ULF4|SPG7_MOUSE Paraplegin OS=Mus musculus OX=10090 GN=Spg7 PE=1 SV=1;tr|D3YZN4|D3YZN4_MOUSE Paraplegin OS=Mus musculus OX=10090 GN=Spg7 PE=1 SV=1;tr|D3YXB7|D3YXB7_MOUSE Paraplegin OS=Mus musculus OX=10090 GN=Spg7 PE=1 SV=2	0.0124973	0.659744	0.0143697	0.613534	0.00187239	0.172147	0.000412668	0.174019	0.00038668
Maspardin	Spg21	NO	sp|Q9CQC8|SPG21_MOUSE Maspardin OS=Mus musculus OX=10090 GN=Spg21 PE=1 SV=1;tr|A0A1L1SST5|A0A1L1SST5_MOUSE Maspardin OS=Mus musculus OX=10090 GN=Spg21 PE=1 SV=1	-0.0226827	0.527444	-0.00888989	0.801892	0.0137928	0.184032	0.00105584	0.197825	0.000694567
Spartin	Spg20	YES	tr|D3Z3F8|D3Z3F8_MOUSE Spastic paraplegia 20, spartin (Troyer syndrome) homolog (human) OS=Mus musculus OX=10090 GN=Spg20 PE=1 SV=1;sp|Q8R1X6|SPART_MOUSE Spartin OS=Mus musculus OX=10090 GN=Spart PE=1 SV=1	0.0138462	0.74392	0.0923358	0.0581626	0.0784896	-0.405821	2.38791e-05	-0.327332	9.48617e-05
Cytospin-B	Specc1	YES	tr|A0A0J9YTU3|A0A0J9YTU3_MOUSE Cytospin-B OS=Mus musculus OX=10090 GN=Specc1 PE=1 SV=1;sp|Q5SXY1|CYTSB_MOUSE Cytospin-B OS=Mus musculus OX=10090 GN=Specc1 PE=1 SV=2;tr|A0A0J9YUR2|A0A0J9YUR2_MOUSE Cytospin-B OS=Mus musculus OX=10090 GN=Specc1 PE=1 SV=1;tr|A	-0.0709123	0.0907315	-0.0138016	0.713657	0.0571108	-0.455497	5.04424e-06	-0.398386	1.22407e-05
	Spcs3	YES	sp|Q6ZWQ7|SPCS3_MOUSE Signal peptidase complex subunit 3 OS=Mus musculus OX=10090 GN=Spcs3 PE=1 SV=1	0.111684	0.363613	0.138546	0.267346	0.0268617	0.331459	0.0237832	0.358321	0.0171286
Signal peptidase complex subunit 2	Spcs2	NO	tr|A0A140LJ01|A0A140LJ01_MOUSE Signal peptidase complex subunit 2 (Fragment) OS=Mus musculus OX=10090 GN=Spcs2 PE=1 SV=1;tr|A0A140LHG8|A0A140LHG8_MOUSE Signal peptidase complex subunit 2 OS=Mus musculus OX=10090 GN=Spcs2 PE=1 SV=1;sp|Q9CYN2|SPCS2_MOUSE Sig	0.100322	0.0164824	0.0244925	0.467637	-0.0758298	0.343787	1.42379e-05	0.267957	7.13916e-05
Signal peptidase complex subunit 1	Spcs1	YES	tr|A0A2I3BRW0|A0A2I3BRW0_MOUSE Signal peptidase complex subunit 1 OS=Mus musculus OX=10090 GN=Spcs1 PE=1 SV=1;sp|Q9D958|SPCS1_MOUSE Signal peptidase complex subunit 1 OS=Mus musculus OX=10090 GN=Spcs1 PE=2 SV=3	0.0658748	0.173018	0.0377745	0.412854	-0.0281003	0.291513	0.000287633	0.263413	0.000529334
Spermatogenesis-associated protein 5	Spata5	NO	tr|A0A0G2JFY0|A0A0G2JFY0_MOUSE Spermatogenesis-associated protein 5 OS=Mus musculus OX=10090 GN=Spata5 PE=1 SV=1;tr|A0A0A0MQ80|A0A0A0MQ80_MOUSE Spermatogenesis-associated protein 5 OS=Mus musculus OX=10090 GN=Spata5 PE=1 SV=1;sp|Q3UMC0|SPAT5_MOUSE Spermato	0.164937	0.0384445	0.0932914	0.192743	-0.0716455	0.0435315	0.522571	-0.028114	0.676892
Spermatogenesis-associated protein 13	Spata13	YES	tr|E0CYU0|E0CYU0_MOUSE Spermatogenesis-associated protein 13 OS=Mus musculus OX=10090 GN=Spata13 PE=1 SV=1;tr|E9Q3I3|E9Q3I3_MOUSE Spermatogenesis-associated protein 13 OS=Mus musculus OX=10090 GN=Spata13 PE=1 SV=1;sp|Q5DU57|SPT13_MOUSE Spermatogenesis-asso	0.119435	0.00251155	0.131456	0.00148122	0.0120212	-0.0118786	0.660006	0.000142615	0.995754
Spastin	Spast	NO	tr|A0A286YE25|A0A286YE25_MOUSE Spastin OS=Mus musculus OX=10090 GN=Spast PE=1 SV=1;sp|Q9QYY8|SPAST_MOUSE Spastin OS=Mus musculus OX=10090 GN=Spast PE=1 SV=3	-0.274073	0.198482	-0.168766	0.410548	0.105306	-0.0922171	0.647025	0.0130892	0.947768
	Spag9	YES	tr|A0A0R4J196|A0A0R4J196_MOUSE C-Jun-amino-terminal kinase-interacting protein 4 OS=Mus musculus OX=10090 GN=Spag9 PE=1 SV=1;tr|F8WH31|F8WH31_MOUSE C-Jun-amino-terminal kinase-interacting protein 4 OS=Mus musculus OX=10090 GN=Spag9 PE=1 SV=2;tr|E9PUD1|E9PU	-0.105835	0.362166	0.331182	0.0188082	0.437017	-1.09328	2.2209e-05	-0.656265	0.000542969
C-Jun-amino-terminal kinase-interacting protein 4	Spag9	YES	sp|Q58A65|JIP4_MOUSE C-Jun-amino-terminal kinase-interacting protein 4 OS=Mus musculus OX=10090 GN=Spag9 PE=1 SV=2;tr|F6SH61|F6SH61_MOUSE C-Jun-amino-terminal kinase-interacting protein 4 (Fragment) OS=Mus musculus OX=10090 GN=Spag9 PE=1 SV=1	0.00134117	0.96893	0.0196006	0.573854	0.0182594	-0.0603721	0.112484	-0.0421127	0.245842
Component of Sp100-rs;Nuclear autoantigen Sp-100	Sp100;Csprs	NO	tr|D6RIJ4|D6RIJ4_MOUSE Nuclear autoantigen Sp-100 OS=Mus musculus OX=10090 GN=Sp100 PE=1 SV=1;tr|E9Q4Y0|E9Q4Y0_MOUSE Nuclear autoantigen Sp-100 OS=Mus musculus OX=10090 GN=Sp100 PE=1 SV=1;tr|A0A1B0GX24|A0A1B0GX24_MOUSE Nuclear autoantigen Sp-100 (Fragment)	0.0320947	0.584163	0.121124	0.0674989	0.0890291	-0.0631346	0.296518	0.0258946	0.657517
Son of sevenless homolog 2	Sos2	NO	tr|A0A0A0MQ87|A0A0A0MQ87_MOUSE Son of sevenless homolog 2 OS=Mus musculus OX=10090 GN=Sos2 PE=1 SV=1;sp|Q02384|SOS2_MOUSE Son of sevenless homolog 2 OS=Mus musculus OX=10090 GN=Sos2 PE=1 SV=2;tr|S4R2C4|S4R2C4_MOUSE Son of sevenless homolog 2 OS=Mus musculu	0.0727301	0.240513	-0.0893498	0.159264	-0.16208	0.1363	0.0474832	-0.0257794	0.662973
Son of sevenless homolog 1	Sos1	YES	sp|Q62245|SOS1_MOUSE Son of sevenless homolog 1 OS=Mus musculus OX=10090 GN=Sos1 PE=1 SV=2	-0.100883	0.0221073	-0.097476	0.0254442	0.00340659	0.0652713	0.0996422	0.0686779	0.0861584
Sortilin	Sort1	YES	sp|Q6PHU5|SORT_MOUSE Sortilin OS=Mus musculus OX=10090 GN=Sort1 PE=1 SV=1	-0.0912014	0.0143884	-0.123804	0.00323169	-0.0326024	0.069541	0.0429375	0.0369386	0.230517
Sorbitol dehydrogenase	Sord	NO	sp|Q64442|DHSO_MOUSE Sorbitol dehydrogenase OS=Mus musculus OX=10090 GN=Sord PE=1 SV=3	-0.0160753	0.5981	-0.050438	0.127239	-0.0343626	0.0283629	0.362643	-0.0059997	0.84261
VPS10 domain-containing receptor SorCS2	Sorcs2	NO	sp|Q9EPR5|SORC2_MOUSE VPS10 domain-containing receptor SorCS2 OS=Mus musculus OX=10090 GN=Sorcs2 PE=1 SV=2	-0.25472	2.13907e-05	-0.134282	0.00111832	0.120438	0.119236	0.00217218	0.239675	3.17722e-05
Vinexin	Sorbs3	NO	tr|Q8K0M3|Q8K0M3_MOUSE Sorbs3 protein OS=Mus musculus OX=10090 GN=Sorbs3 PE=1 SV=1;sp|Q9R1Z8|VINEX_MOUSE Vinexin OS=Mus musculus OX=10090 GN=Sorbs3 PE=1 SV=1;tr|A0A2I3BS41|A0A2I3BS41_MOUSE Vinexin OS=Mus musculus OX=10090 GN=Sorbs3 PE=1 SV=1	-0.10256	0.0580499	0.00353815	0.939826	0.106098	-0.236893	0.00124883	-0.130795	0.0235322
Sorbin and SH3 domain-containing protein 1	Sorbs1	NO	tr|A0A286YCQ0|A0A286YCQ0_MOUSE Sorbin and SH3 domain-containing protein 1 OS=Mus musculus OX=10090 GN=Sorbs1 PE=1 SV=1;tr|A0A286YDN0|A0A286YDN0_MOUSE Sorbin and SH3 domain-containing protein 1 OS=Mus musculus OX=10090 GN=Sorbs1 PE=1 SV=1;tr|E9Q6A3|E9Q6A3_M	-0.0932434	0.176958	-0.0338267	0.602593	0.0594167	-0.195989	0.0161991	-0.136573	0.0640232
Protein SOGA1;N-terminal form;C-terminal 80 kDa form	Soga1	YES	tr|A2ACV6|A2ACV6_MOUSE Protein SOGA1 OS=Mus musculus OX=10090 GN=Soga1 PE=1 SV=1;sp|E1U8D0|SOGA1_MOUSE Protein SOGA1 OS=Mus musculus OX=10090 GN=Soga1 PE=1 SV=3	-0.0685965	0.130567	0.0432726	0.315537	0.111869	-0.485826	6.49754e-06	-0.373956	3.61034e-05
Extracellular superoxide dismutase [Cu-Zn]	Sod3	NO	sp|O09164|SODE_MOUSE Extracellular superoxide dismutase [Cu-Zn] OS=Mus musculus OX=10090 GN=Sod3 PE=1 SV=1	-0.0687742	0.644775	-0.0373254	0.801307	0.0314488	0.134033	0.379321	0.165481	0.284752
Superoxide dismutase [Mn], mitochondrial	Sod2	YES	sp|P09671|SODM_MOUSE Superoxide dismutase [Mn], mitochondrial OS=Mus musculus OX=10090 GN=Sod2 PE=1 SV=3	0.0184796	0.702695	-0.0153676	0.75052	-0.0338472	0.190885	0.00464362	0.157037	0.0119696
Superoxide dismutase [Cu-Zn]	Sod1	NO	sp|P08228|SODC_MOUSE Superoxide dismutase [Cu-Zn] OS=Mus musculus OX=10090 GN=Sod1 PE=1 SV=2	0.154335	0.00334916	-0.0965753	0.0293331	-0.25091	0.133494	0.0070069	-0.117416	0.0128331
Sterol O-acyltransferase 2	Soat2	NO	sp|O88908|SOAT2_MOUSE Sterol O-acyltransferase 2 OS=Mus musculus OX=10090 GN=Soat2 PE=1 SV=2;tr|F6SMH4|F6SMH4_MOUSE Sterol O-acyltransferase 2 (Fragment) OS=Mus musculus OX=10090 GN=Soat2 PE=1 SV=1	0.0991022	0.147139	0.0701793	0.28604	-0.0289229	0.287341	0.00220072	0.258418	0.00387451
Sorting nexin-9	Snx9	NO	sp|Q91VH2|SNX9_MOUSE Sorting nexin-9 OS=Mus musculus OX=10090 GN=Snx9 PE=1 SV=1	0.102626	0.0218003	0.11032	0.016012	0.00769341	-0.176959	0.00148433	-0.169266	0.00190058
Sorting nexin-7	Snx7	NO	tr|F8WI30|F8WI30_MOUSE Sorting nexin-7 OS=Mus musculus OX=10090 GN=Snx7 PE=1 SV=1;sp|Q9CY18|SNX7_MOUSE Sorting nexin-7 OS=Mus musculus OX=10090 GN=Snx7 PE=1 SV=1;tr|F6RSR4|F6RSR4_MOUSE Sorting nexin-7 (Fragment) OS=Mus musculus OX=10090 GN=Snx7 PE=1 SV=1;t	0.101209	0.103346	0.250349	0.00245265	0.14914	-0.0628674	0.282579	0.0862728	0.154413
Sorting nexin-6;Sorting nexin-6, N-terminally processed	Snx6	NO	sp|Q6P8X1|SNX6_MOUSE Sorting nexin-6 OS=Mus musculus OX=10090 GN=Snx6 PE=1 SV=2;tr|A0A1W2P701|A0A1W2P701_MOUSE Sorting nexin-6 OS=Mus musculus OX=10090 GN=Snx6 PE=1 SV=1	-0.003259	0.913758	-0.017071	0.575	-0.013812	0.0108616	0.71936	-0.00295041	0.92189
Sorting nexin-5	Snx5	NO	sp|Q9D8U8|SNX5_MOUSE Sorting nexin-5 OS=Mus musculus OX=10090 GN=Snx5 PE=1 SV=1	0.0718607	0.031772	0.0306255	0.290855	-0.0412353	0.0357481	0.224215	-0.0054872	0.843552
Sorting nexin-4	Snx4	NO	sp|Q91YJ2|SNX4_MOUSE Sorting nexin-4 OS=Mus musculus OX=10090 GN=Snx4 PE=1 SV=1	0.00453934	0.863239	-0.039034	0.168655	-0.0435733	0.0663892	0.0350809	0.0228158	0.399101
Sorting nexin-30	Snx30	NO	sp|Q8CE50|SNX30_MOUSE Sorting nexin-30 OS=Mus musculus OX=10090 GN=Snx30 PE=1 SV=1	-0.0878271	0.334779	-0.119215	0.202718	-0.0313878	0.141532	0.139279	0.110144	0.235237
Sorting nexin-3	Snx3	NO	tr|Q78ZM0|Q78ZM0_MOUSE Sorting nexin 3, isoform CRA_b OS=Mus musculus OX=10090 GN=Snx3 PE=1 SV=1;tr|D3Z6Z0|D3Z6Z0_MOUSE Sorting nexin-3 OS=Mus musculus OX=10090 GN=Snx3 PE=1 SV=1;sp|O70492|SNX3_MOUSE Sorting nexin-3 OS=Mus musculus OX=10090 GN=Snx3 PE=1 SV	0.107779	0.0123343	0.00706875	0.831987	-0.10071	0.0359791	0.299568	-0.0647314	0.0839636
Sorting nexin-29	Snx29	NO	sp|Q9D3S3|SNX29_MOUSE Sorting nexin-29 OS=Mus musculus OX=10090 GN=Snx29 PE=1 SV=2;tr|D3YZ90|D3YZ90_MOUSE Sorting nexin-29 OS=Mus musculus OX=10090 GN=Snx29 PE=1 SV=2	0.0491514	0.223923	-0.01267	0.740827	-0.0618213	0.045675	0.254958	-0.0161463	0.67418
Sorting nexin-27	Snx27	NO	sp|Q3UHD6|SNX27_MOUSE Sorting nexin-27 OS=Mus musculus OX=10090 GN=Snx27 PE=1 SV=2;tr|A0A0G2JF85|A0A0G2JF85_MOUSE Sorting nexin-27 OS=Mus musculus OX=10090 GN=Snx27 PE=1 SV=1	-0.0720228	0.12535	-0.119719	0.023389	-0.0476966	0.129478	0.0167963	0.0817813	0.0887715
Sorting nexin-25	Snx25	YES	tr|E9Q1K0|E9Q1K0_MOUSE Sorting nexin-25 OS=Mus musculus OX=10090 GN=Snx25 PE=1 SV=1;sp|Q3ZT31|SNX25_MOUSE Sorting nexin-25 OS=Mus musculus OX=10090 GN=Snx25 PE=1 SV=3	-0.0763	0.0737662	-0.0519359	0.195417	0.024364	0.0949037	0.0348535	0.119268	0.0135247
Sorting nexin-2	Snx2	YES	sp|Q9CWK8|SNX2_MOUSE Sorting nexin-2 OS=Mus musculus OX=10090 GN=Snx2 PE=1 SV=2	-0.020939	0.563921	0.000715597	0.984064	0.0216546	-0.0264378	0.469551	-0.00478324	0.893856
	Snx19	YES	sp|Q6P4T1|SNX19_MOUSE Sorting nexin-19 OS=Mus musculus OX=10090 GN=Snx19 PE=1 SV=1	-0.063819	0.501094	-0.0770987	0.419939	-0.0132797	-0.163754	0.111934	-0.177034	0.0901832
Sorting nexin;Sorting nexin-18	Snx18	YES	tr|Q8C788|Q8C788_MOUSE Sorting nexin OS=Mus musculus OX=10090 GN=Snx18 PE=1 SV=1;sp|Q91ZR2|SNX18_MOUSE Sorting nexin-18 OS=Mus musculus OX=10090 GN=Snx18 PE=1 SV=1	-0.425707	0.0193111	-0.0764142	0.603143	0.349293	-0.204152	0.189545	0.145141	0.335775
Sorting nexin-17	Snx17	NO	sp|Q8BVL3|SNX17_MOUSE Sorting nexin-17 OS=Mus musculus OX=10090 GN=Snx17 PE=1 SV=2	0.0390387	0.387029	-0.0847665	0.0855939	-0.123805	-0.167486	0.00560444	-0.291291	0.000248156
Sorting nexin-15	Snx15	NO	sp|Q91WE1|SNX15_MOUSE Sorting nexin-15 OS=Mus musculus OX=10090 GN=Snx15 PE=1 SV=1;tr|D3Z479|D3Z479_MOUSE Sorting nexin-15 OS=Mus musculus OX=10090 GN=Snx15 PE=1 SV=1;tr|D3YVT2|D3YVT2_MOUSE Sorting nexin-15 (Fragment) OS=Mus musculus OX=10090 GN=Snx15 PE=1	0.084974	0.120312	-0.0562817	0.279484	-0.141256	0.0460831	0.369063	-0.0951726	0.0881699
Sorting nexin-14	Snx14	YES	tr|G3UXB6|G3UXB6_MOUSE Sorting nexin-14 OS=Mus musculus OX=10090 GN=Snx14 PE=1 SV=1;tr|G3UX33|G3UX33_MOUSE Sorting nexin-14 OS=Mus musculus OX=10090 GN=Snx14 PE=1 SV=1;sp|Q8BHY8|SNX14_MOUSE Sorting nexin-14 OS=Mus musculus OX=10090 GN=Snx14 PE=1 SV=2;tr|G3	0.0113251	0.860668	0.0320646	0.622072	0.0207395	0.145435	0.052349	0.166175	0.032242
Sorting nexin-13	Snx13	YES	tr|E9QNG6|E9QNG6_MOUSE Sorting nexin-13 OS=Mus musculus OX=10090 GN=Snx13 PE=1 SV=2;sp|Q6PHS6|SNX13_MOUSE Sorting nexin-13 OS=Mus musculus OX=10090 GN=Snx13 PE=2 SV=1;tr|E9Q7T4|E9Q7T4_MOUSE Sorting nexin-13 OS=Mus musculus OX=10090 GN=Snx13 PE=1 SV=2	-0.00217727	0.967799	0.0419158	0.447233	0.044093	0.125667	0.0468418	0.16976	0.0140599
Sorting nexin-12	Snx12	YES	tr|Q6ZWQ5|Q6ZWQ5_MOUSE Sorting nexin 12, isoform CRA_c OS=Mus musculus OX=10090 GN=Snx12 PE=1 SV=1;tr|Q3TGS7|Q3TGS7_MOUSE Sorting nexin 12, isoform CRA_b OS=Mus musculus OX=10090 GN=Snx12 PE=1 SV=1;tr|Q3V2H3|Q3V2H3_MOUSE Sorting nexin-12 OS=Mus musculus OX	-0.0279879	0.530244	-0.0352896	0.432697	-0.00730163	0.113394	0.0320853	0.106093	0.0411709
Sorting nexin-1	Snx1	NO	tr|Q6NZD2|Q6NZD2_MOUSE Sorting nexin 1 OS=Mus musculus OX=10090 GN=Snx1 PE=1 SV=1;sp|Q9WV80|SNX1_MOUSE Sorting nexin-1 OS=Mus musculus OX=10090 GN=Snx1 PE=1 SV=1	0.0876362	0.0949527	0.143794	0.0159214	0.0561574	-0.00658005	0.888704	0.0495774	0.310647
Beta-1-syntrophin	Sntb1	NO	sp|Q99L88|SNTB1_MOUSE Beta-1-syntrophin OS=Mus musculus OX=10090 GN=Sntb1 PE=1 SV=4	0.0638975	0.0384361	0.0246903	0.357416	-0.0392071	0.0148867	0.571143	-0.0243204	0.36422
Small nuclear ribonucleoprotein Sm D2	Snrpd2	YES	sp|P62317|SMD2_MOUSE Small nuclear ribonucleoprotein Sm D2 OS=Mus musculus OX=10090 GN=Snrpd2 PE=1 SV=1	0.566447	0.00185423	0.514965	0.00310684	-0.0514819	0.233107	0.0849361	0.181625	0.161918
Small nuclear ribonucleoprotein Sm D1	Snrpd1	NO	sp|P62315|SMD1_MOUSE Small nuclear ribonucleoprotein Sm D1 OS=Mus musculus OX=10090 GN=Snrpd1 PE=1 SV=1	0.106847	0.523197	0.0364001	0.825458	-0.0704466	0.0390934	0.812826	-0.0313532	0.849273
SNF-related serine/threonine-protein kinase	Snrk	NO	tr|D3YXV4|D3YXV4_MOUSE SNF-related serine/threonine-protein kinase (Fragment) OS=Mus musculus OX=10090 GN=Snrk PE=1 SV=1;tr|D3Z3V0|D3Z3V0_MOUSE SNF-related serine/threonine-protein kinase (Fragment) OS=Mus musculus OX=10090 GN=Snrk PE=1 SV=2;tr|D3Z1F6|D3Z1	0.265042	0.0727112	0.158729	0.246197	-0.106313	0.152509	0.263416	0.0461955	0.723363
Vacuolar-sorting protein SNF8	Snf8	NO	sp|Q9CZ28|SNF8_MOUSE Vacuolar-sorting protein SNF8 OS=Mus musculus OX=10090 GN=Snf8 PE=1 SV=1;tr|A2A6M1|A2A6M1_MOUSE Vacuolar-sorting protein SNF8 OS=Mus musculus OX=10090 GN=Snf8 PE=1 SV=1	0.000284641	0.995305	0.029558	0.546773	0.0292734	-0.00695831	0.885701	0.0223151	0.647203
Staphylococcal nuclease domain-containing protein 1	Snd1	YES	sp|Q78PY7|SND1_MOUSE Staphylococcal nuclease domain-containing protein 1 OS=Mus musculus OX=10090 GN=Snd1 PE=1 SV=1;tr|Q3TJ56|Q3TJ56_MOUSE Staphylococcal nuclease domain-containing protein 1 OS=Mus musculus OX=10090 GN=Snd1 PE=1 SV=1	0.0705792	0.0411671	0.0171583	0.562117	-0.0534209	0.0340053	0.267274	-0.0194155	0.51334
Alpha-synuclein	Snca	YES	sp|O55042|SYUA_MOUSE Alpha-synuclein OS=Mus musculus OX=10090 GN=Snca PE=1 SV=2	0.17016	0.00609553	0.165492	0.00699252	-0.00466754	-0.4283	2.65981e-05	-0.432967	2.47886e-05
SNARE-associated protein Snapin	Snapin	NO	sp|Q9Z266|SNAPN_MOUSE SNARE-associated protein Snapin OS=Mus musculus OX=10090 GN=Snapin PE=1 SV=1	-0.257755	0.292985	-0.200444	0.405862	0.0573114	0.43671	0.0957064	0.494021	0.0660137
Synaptosomal-associated protein 47	Snap47	NO	sp|Q8R570|SNP47_MOUSE Synaptosomal-associated protein 47 OS=Mus musculus OX=10090 GN=Snap47 PE=1 SV=1;tr|I7HPB1|I7HPB1_MOUSE Synaptosomal-associated protein 47 (Fragment) OS=Mus musculus OX=10090 GN=Snap47 PE=1 SV=1;tr|I7HFU4|I7HFU4_MOUSE Synaptosomal-asso	-0.165358	0.0277107	-0.0124004	0.840936	0.152958	-0.709377	7.36497e-06	-0.55642	3.61171e-05
Synaptosomal-associated protein 29	Snap29	NO	sp|Q9ERB0|SNP29_MOUSE Synaptosomal-associated protein 29 OS=Mus musculus OX=10090 GN=Snap29 PE=1 SV=1	-0.161978	0.0500685	-0.072258	0.325946	0.0897198	-1.08446	1.08724e-06	-0.994739	1.94411e-06
Synaptosomal-associated protein;Synaptosomal-associated protein 23	Snap23	YES	tr|Q9D3L3|Q9D3L3_MOUSE Synaptosomal-associated protein OS=Mus musculus OX=10090 GN=Snap23 PE=1 SV=1;sp|O09044|SNP23_MOUSE Synaptosomal-associated protein 23 OS=Mus musculus OX=10090 GN=Snap23 PE=1 SV=1;tr|B0R030|B0R030_MOUSE Synaptosomal-associated protein	0.0448727	0.201652	0.123178	0.00626365	0.0783053	-0.485849	1.40379e-06	-0.407543	4.55567e-06
SET and MYND domain-containing protein 5	Smyd5	NO	sp|Q3TYX3|SMYD5_MOUSE SET and MYND domain-containing protein 5 OS=Mus musculus OX=10090 GN=Smyd5 PE=1 SV=2	-0.104452	0.156787	0.0973535	0.182858	0.201806	0.0167783	0.80604	0.218584	0.0129417
Histone-lysine N-methyltransferase SMYD3	Smyd3	YES	sp|Q9CWR2|SMYD3_MOUSE Histone-lysine N-methyltransferase SMYD3 OS=Mus musculus OX=10090 GN=Smyd3 PE=2 SV=1	-0.214759	0.00206439	-0.170341	0.00689364	0.0444183	0.0625998	0.205926	0.107018	0.0488732
E3 ubiquitin-protein ligase SMURF2	Smurf2	YES	sp|A2A5Z6|SMUF2_MOUSE E3 ubiquitin-protein ligase SMURF2 OS=Mus musculus OX=10090 GN=Smurf2 PE=1 SV=1	0.0955611	0.155977	0.0930273	0.165687	-0.00253385	0.00480755	0.938435	0.0022737	0.970856
	Smtn	NO	tr|D3YVS1|D3YVS1_MOUSE Smoothelin OS=Mus musculus OX=10090 GN=Smtn PE=1 SV=1	0.431599	0.00731357	0.11425	0.353983	-0.317348	-0.160194	0.206798	-0.477542	0.00440636
Smoothelin	Smtn	NO	tr|D3Z3Q3|D3Z3Q3_MOUSE Smoothelin OS=Mus musculus OX=10090 GN=Smtn PE=1 SV=1;sp|Q921U8|SMTN_MOUSE Smoothelin OS=Mus musculus OX=10090 GN=Smtn PE=1 SV=2	0.382634	0.00019263	0.307129	0.000723955	-0.0755049	-0.571809	1.47756e-05	-0.647314	6.51827e-06
Spermine synthase	Sms	YES	sp|P97355|SPSY_MOUSE Spermine synthase OS=Mus musculus OX=10090 GN=Sms PE=1 SV=1;tr|E9PZ58|E9PZ58_MOUSE Spermine synthase OS=Mus musculus OX=10090 GN=Sms PE=1 SV=1	0.127715	0.00908202	0.209732	0.000634738	0.0820163	0.0480664	0.219477	0.130083	0.00831984
Sphingomyelin phosphodiesterase 4	Smpd4	NO	sp|Q6ZPR5|NSMA3_MOUSE Sphingomyelin phosphodiesterase 4 OS=Mus musculus OX=10090 GN=Smpd4 PE=1 SV=2	-0.145037	0.0446767	0.0558935	0.37727	0.200931	-0.069827	0.277543	0.131104	0.0630278
Sphingomyelin phosphodiesterase 2	Smpd2	NO	sp|O70572|NSMA_MOUSE Sphingomyelin phosphodiesterase 2 OS=Mus musculus OX=10090 GN=Smpd2 PE=1 SV=1	0.11681	0.13216	-0.105568	0.167377	-0.222378	0.443704	0.000358569	0.221325	0.0146307
Spermine oxidase	Smox	YES	sp|Q99K82|SMOX_MOUSE Spermine oxidase OS=Mus musculus OX=10090 GN=Smox PE=1 SV=1;tr|Q3TLR8|Q3TLR8_MOUSE Spermine oxidase OS=Mus musculus OX=10090 GN=Smox PE=1 SV=1	-0.0151039	0.752546	-0.0690079	0.178083	-0.053904	0.0816045	0.120121	0.0277005	0.566552
Survival motor neuron protein	Smn1	NO	sp|P97801|SMN_MOUSE Survival motor neuron protein OS=Mus musculus OX=10090 GN=Smn1 PE=1 SV=1	0.20836	0.00277666	0.229973	0.00161866	0.0216129	-0.442676	2.9779e-05	-0.421063	4.11522e-05
Small integral membrane protein 7	Smim7	NO	tr|F8WIU9|F8WIU9_MOUSE Small integral membrane protein 7 OS=Mus musculus OX=10090 GN=Smim7 PE=1 SV=1;sp|Q5RKS2|SMIM7_MOUSE Small integral membrane protein 7 OS=Mus musculus OX=10090 GN=Smim7 PE=3 SV=1	0.164957	0.0265755	0.0168073	0.783177	-0.14815	1.01301	6.19608e-07	0.864858	1.80007e-06
Small integral membrane protein 5	Smim5	NO	sp|Q8BT42|SMIM5_MOUSE Small integral membrane protein 5 OS=Mus musculus OX=10090 GN=Smim5 PE=4 SV=1;tr|V9GXR9|V9GXR9_MOUSE Small integral membrane protein 5 OS=Mus musculus OX=10090 GN=Smim5 PE=1 SV=1	0.0641049	0.587341	-0.0824817	0.488154	-0.146587	0.501984	0.00304747	0.355398	0.0163249
Small integral membrane protein 15	Smim15	YES	sp|Q3UTD9|SIM15_MOUSE Small integral membrane protein 15 OS=Mus musculus OX=10090 GN=Smim15 PE=1 SV=1	0.655354	0.0101288	0.073489	0.706076	-0.581865	0.505514	0.0308376	-0.076351	0.695317
Small integral membrane protein 1	Smim1	NO	tr|S4R2T3|S4R2T3_MOUSE Small integral membrane protein 1 OS=Mus musculus OX=10090 GN=Smim1 PE=1 SV=1;sp|P0C8K7|SMIM1_MOUSE Small integral membrane protein 1 OS=Mus musculus OX=10090 GN=Smim1 PE=1 SV=1;tr|S4R191|S4R191_MOUSE Small integral membrane protein	0.574377	0.00131818	-0.695279	0.000432939	-1.26966	-0.562747	0.00147909	-1.8324	8.14569e-07
Protein SMG9	Smg9	NO	sp|Q9DB90|SMG9_MOUSE Protein SMG9 OS=Mus musculus OX=10090 GN=Smg9 PE=1 SV=1;tr|F6YIT4|F6YIT4_MOUSE Protein SMG9 (Fragment) OS=Mus musculus OX=10090 GN=Smg9 PE=1 SV=8	0.0941073	0.330304	0.00310921	0.973381	-0.0909981	-0.566926	0.000423149	-0.657924	0.00017051
Protein SMG8	Smg8	NO	sp|Q8VE18|SMG8_MOUSE Protein SMG8 OS=Mus musculus OX=10090 GN=Smg8 PE=1 SV=1	0.0260999	0.509313	-0.0117703	0.762967	-0.0378702	0.215212	0.000742181	0.177342	0.00221673
Protein SMG7	Smg7	NO	sp|Q5RJH6|SMG7_MOUSE Protein SMG7 OS=Mus musculus OX=10090 GN=Smg7 PE=2 SV=1	0.0930053	0.31582	-0.104435	0.264511	-0.19744	0.0243572	0.785317	-0.173083	0.0845992
Protein SMG5	Smg5	NO	sp|Q6ZPY2|SMG5_MOUSE Protein SMG5 OS=Mus musculus OX=10090 GN=Smg5 PE=1 SV=2	-0.130688	0.0479013	-0.114288	0.074491	0.0164	0.02323	0.682602	0.03963	0.490611
Serine/threonine-protein kinase SMG1	Smg1	YES	sp|Q8BKX6|SMG1_MOUSE Serine/threonine-protein kinase SMG1 OS=Mus musculus OX=10090 GN=Smg1 PE=1 SV=3	0.0204444	0.515432	-0.0450742	0.17508	-0.0655186	0.105914	0.00954063	0.0403954	0.218286
Essential MCU regulator, mitochondrial	Smdt1	NO	tr|A0A2R8VHK6|A0A2R8VHK6_MOUSE Essential MCU regulator, mitochondrial OS=Mus musculus OX=10090 GN=Smdt1 PE=1 SV=1;tr|E0CZF0|E0CZF0_MOUSE Essential MCU regulator, mitochondrial OS=Mus musculus OX=10090 GN=Smdt1 PE=1 SV=1;sp|Q9DB10|EMRE_MOUSE Essential MCU r	0.365469	0.0160278	0.127999	0.304315	-0.237471	0.963146	7.46473e-05	0.725675	0.000430231
Smith-Magenis syndrome chromosomal region candidate gene 8 protein homolog	Smcr8	NO	sp|Q3UMB5|SMCR8_MOUSE Guanine nucleotide exchange protein SMCR8 OS=Mus musculus OX=10090 GN=Smcr8 PE=1 SV=2	-0.0460011	0.32596	0.0304482	0.506929	0.0764493	-0.129534	0.0209188	-0.053085	0.262449
Structural maintenance of chromosomes protein;Structural maintenance of chromosomes protein 4	Smc4	NO	tr|E9Q2X6|E9Q2X6_MOUSE Structural maintenance of chromosomes protein OS=Mus musculus OX=10090 GN=Smc4 PE=1 SV=1;sp|Q8CG47|SMC4_MOUSE Structural maintenance of chromosomes protein 4 OS=Mus musculus OX=10090 GN=Smc4 PE=1 SV=1	0.0676945	0.204287	0.111843	0.0541963	0.0441483	-0.0629833	0.233938	-0.018835	0.708271
Structural maintenance of chromosomes protein 2	Smc2	YES	sp|Q8CG48|SMC2_MOUSE Structural maintenance of chromosomes protein 2 OS=Mus musculus OX=10090 GN=Smc2 PE=1 SV=2	0.0724413	0.0362574	0.0675555	0.0467446	-0.00488585	0.0400844	0.19519	0.0351985	0.248771
SWI/SNF-related matrix-associated actin-dependent regulator of chromatin subfamily A member 5;Probable global transcription activator SNF2L1	Smarca5;Smarca1	YES	sp|Q91ZW3|SMCA5_MOUSE SWI/SNF-related matrix-associated actin-dependent regulator of chromatin subfamily A member 5 OS=Mus musculus OX=10090 GN=Smarca5 PE=1 SV=1;sp|Q6PGB8|SMCA1_MOUSE Probable global transcription activator SNF2L1 OS=Mus musculus OX=10090	0.0654771	0.563812	0.0756013	0.506902	0.0101242	-0.131621	0.263034	-0.121497	0.298271
Stromal membrane-associated protein 2	Smap2	NO	sp|Q7TN29|SMAP2_MOUSE Stromal membrane-associated protein 2 OS=Mus musculus OX=10090 GN=Smap2 PE=1 SV=1	-0.0356867	0.533505	-0.0739077	0.217432	-0.0382211	-0.372781	0.000257965	-0.411002	0.000141091
Stromal membrane-associated protein 1	Smap1	YES	sp|Q91VZ6|SMAP1_MOUSE Stromal membrane-associated protein 1 OS=Mus musculus OX=10090 GN=Smap1 PE=1 SV=1;tr|D3YVX4|D3YVX4_MOUSE Stromal membrane-associated protein 1 OS=Mus musculus OX=10090 GN=Smap1 PE=1 SV=1	-0.0436733	0.181366	-0.0153406	0.617952	0.0283327	-0.0574369	0.0920929	-0.0291042	0.355377
Small acidic protein	Smap;1110004F10Rik	NO	sp|Q9R0P4|SMAP_MOUSE Small acidic protein OS=Mus musculus OX=10090 GN=Smap PE=1 SV=1;tr|A0A0U1RPJ7|A0A0U1RPJ7_MOUSE RIKEN cDNA 1110004F10 gene (Fragment) OS=Mus musculus OX=10090 GN=1110004F10Rik PE=1 SV=1;tr|D6RI64|D6RI64_MOUSE RIKEN cDNA 1110004F10 gene	0.170768	0.241504	0.513914	0.00641056	0.343146	-1.41082	1.61331e-05	-1.06768	9.71063e-05
Mothers against decapentaplegic homolog 5	Smad5	YES	sp|P97454|SMAD5_MOUSE Mothers against decapentaplegic homolog 5 OS=Mus musculus OX=10090 GN=Smad5 PE=1 SV=2	0.17781	0.00223656	0.159958	0.00392884	-0.0178521	0.0501827	0.225121	0.0323307	0.419581
Mothers against decapentaplegic homolog 4	Smad4	NO	sp|P97471|SMAD4_MOUSE Mothers against decapentaplegic homolog 4 OS=Mus musculus OX=10090 GN=Smad4 PE=1 SV=2	-0.169327	0.0137516	-0.183973	0.00938425	-0.0146466	0.0307993	0.569854	0.0161528	0.763632
Mothers against decapentaplegic homolog 3	Smad3	NO	sp|Q8BUN5|SMAD3_MOUSE Mothers against decapentaplegic homolog 3 OS=Mus musculus OX=10090 GN=Smad3 PE=1 SV=2	-0.037534	0.482485	-0.0816728	0.150956	-0.0441387	0.0352197	0.508953	-0.008919	0.865083
Mothers against decapentaplegic homolog 2;Mothers against decapentaplegic homolog	Smad2;Smad3	YES	sp|Q62432|SMAD2_MOUSE Mothers against decapentaplegic homolog 2 OS=Mus musculus OX=10090 GN=Smad2 PE=1 SV=2;tr|E9Q3M0|E9Q3M0_MOUSE Mothers against decapentaplegic homolog OS=Mus musculus OX=10090 GN=Smad2 PE=1 SV=1;tr|E9Q5P9|E9Q5P9_MOUSE Mothers against de	0.122178	0.0391489	-0.0604088	0.250148	-0.182586	0.0812602	0.135707	-0.101326	0.0737821
Mothers against decapentaplegic homolog 1;Mothers against decapentaplegic homolog	Smad1	YES	sp|P70340|SMAD1_MOUSE Mothers against decapentaplegic homolog 1 OS=Mus musculus OX=10090 GN=Smad1 PE=1 SV=2;tr|Q8C3Y6|Q8C3Y6_MOUSE Mothers against decapentaplegic homolog OS=Mus musculus OX=10090 GN=Smad1 PE=1 SV=1	0.0985286	0.24004	0.0733201	0.371047	-0.0252086	0.0652644	0.423032	0.0400558	0.617592
Antileukoproteinase	Slpi	NO	tr|E9Q748|E9Q748_MOUSE Antileukoproteinase OS=Mus musculus OX=10090 GN=Slpi PE=1 SV=1;sp|P97430|SLPI_MOUSE Antileukoproteinase OS=Mus musculus OX=10090 GN=Slpi PE=1 SV=1	-0.128328	0.0968024	0.331001	0.00171352	0.45933	-1.77099	3.31242e-08	-1.31166	2.57225e-07
Sarcolemmal membrane-associated protein	Slmap	NO	sp|Q3URD3|SLMAP_MOUSE Sarcolemmal membrane-associated protein OS=Mus musculus OX=10090 GN=Slmap PE=1 SV=2;tr|H7BX64|H7BX64_MOUSE Sarcolemmal membrane-associated protein OS=Mus musculus OX=10090 GN=Slmap PE=1 SV=1;tr|F8WIH0|F8WIH0_MOUSE Sarcolemmal membrane	-0.04444	0.155181	-0.0460283	0.14296	-0.00158831	0.0848246	0.019004	0.0832363	0.0205855
STE20-like serine/threonine-protein kinase	Slk	NO	sp|O54988|SLK_MOUSE STE20-like serine/threonine-protein kinase OS=Mus musculus OX=10090 GN=Slk PE=1 SV=2	-0.0511203	0.1333	0.0226392	0.476143	0.0737595	-0.228039	0.00013635	-0.15428	0.00140374
SRA stem-loop-interacting RNA-binding protein, mitochondrial	Slirp	NO	sp|Q9D8T7|SLIRP_MOUSE SRA stem-loop-interacting RNA-binding protein, mitochondrial OS=Mus musculus OX=10090 GN=Slirp PE=1 SV=2;tr|F8WHU8|F8WHU8_MOUSE SRA stem-loop-interacting RNA-binding protein, mitochondrial (Fragment) OS=Mus musculus OX=10090 GN=Slirp	-0.114421	0.00969077	-0.0618238	0.0980022	0.0525975	0.165817	0.00141155	0.218415	0.000279539
	Slfn14	YES	sp|V9GXG1|SLN14_MOUSE Protein SLFN14 OS=Mus musculus OX=10090 GN=Slfn14 PE=1 SV=1	0.0580865	0.101643	0.0449655	0.187973	-0.0131211	-0.00824489	0.796616	-0.0213659	0.510232
Solute carrier organic anion transporter family member 4A1	Slco4a1	NO	sp|Q8K078|SO4A1_MOUSE Solute carrier organic anion transporter family member 4A1 OS=Mus musculus OX=10090 GN=Slco4a1 PE=1 SV=2	-0.19466	0.00440257	0.202873	0.0035521	0.397533	-0.0235877	0.630419	0.373945	9.94916e-05
Solute carrier organic anion transporter family member 3A1	Slco3a1	YES	sp|Q8R3L5|SO3A1_MOUSE Solute carrier organic anion transporter family member 3A1 OS=Mus musculus OX=10090 GN=Slco3a1 PE=1 SV=1;tr|D3YXA8|D3YXA8_MOUSE Solute carrier organic anion transporter family member OS=Mus musculus OX=10090 GN=Slco3a1 PE=1 SV=1	0.0739064	0.192617	0.177709	0.0106079	0.103803	-0.172853	0.0120536	-0.0690497	0.219953
Sodium/hydrogen exchanger 9	Slc9a9	YES	sp|Q8BZ00|SL9A9_MOUSE Sodium/hydrogen exchanger 9 OS=Mus musculus OX=10090 GN=Slc9a9 PE=2 SV=1	0.00784316	0.881603	0.152651	0.0200372	0.144807	-0.250099	0.00176421	-0.105292	0.0772223
Sodium/hydrogen exchanger	Slc9a6	NO	tr|A1L3P4|A1L3P4_MOUSE Sodium/hydrogen exchanger OS=Mus musculus OX=10090 GN=Slc9a6 PE=1 SV=1;tr|B0QZV3|B0QZV3_MOUSE Sodium/hydrogen exchanger OS=Mus musculus OX=10090 GN=Slc9a6 PE=1 SV=1;tr|A0A140LJ55|A0A140LJ55_MOUSE Solute carrier family 9 (sodium/hydro	-0.0167713	0.676585	-0.125152	0.0143434	-0.108381	0.147775	0.00657104	0.0393941	0.340967
Na(+)/H(+) exchange regulatory cofactor NHE-RF1	Slc9a3r1	NO	sp|P70441|NHRF1_MOUSE Na(+)/H(+) exchange regulatory cofactor NHE-RF1 OS=Mus musculus OX=10090 GN=Slc9a3r1 PE=1 SV=3	-0.0147465	0.584885	0.023706	0.388112	0.0384525	-0.160463	0.000454235	-0.122011	0.00218491
Sodium/hydrogen exchanger 1	Slc9a1	NO	sp|Q61165|SL9A1_MOUSE Sodium/hydrogen exchanger 1 OS=Mus musculus OX=10090 GN=Slc9a1 PE=1 SV=1	0.0218918	0.571902	-0.062122	0.136718	-0.0840139	-0.206631	0.000854352	-0.290645	0.000107897
Sodium/potassium/calcium exchanger 6, mitochondrial	Slc8b1	NO	tr|D3Z226|D3Z226_MOUSE Mitochondrial sodium/calcium exchanger protein OS=Mus musculus OX=10090 GN=Slc8b1 PE=1 SV=1;sp|Q925Q3|NCLX_MOUSE Mitochondrial sodium/calcium exchanger protein OS=Mus musculus OX=10090 GN=Slc8b1 PE=2 SV=2	0.31613	0.0500748	0.215881	0.150171	-0.100249	0.25656	0.0964025	0.156311	0.280084
Y+L amino acid transporter 2	Slc7a6	NO	tr|A0A1D5RMA4|A0A1D5RMA4_MOUSE Y+L amino acid transporter 2 OS=Mus musculus OX=10090 GN=Slc7a6 PE=1 SV=1;tr|A0A1D5RMI7|A0A1D5RMI7_MOUSE Y+L amino acid transporter 2 (Fragment) OS=Mus musculus OX=10090 GN=Slc7a6 PE=1 SV=1;tr|A0A1D5RM43|A0A1D5RM43_MOUSE Y+L	-0.272614	0.000881631	-0.199502	0.00484836	0.0731124	-0.0990648	0.0831961	-0.0259524	0.612581
Large neutral amino acids transporter small subunit 1	Slc7a5	NO	sp|Q9Z127|LAT1_MOUSE Large neutral amino acids transporter small subunit 1 OS=Mus musculus OX=10090 GN=Slc7a5 PE=1 SV=2	-0.0297705	0.488674	-0.0242547	0.570319	0.0055158	-0.084833	0.0761894	-0.0793172	0.0929486
Cationic amino acid transporter 4	Slc7a4	NO	sp|Q8BLQ7|CTR4_MOUSE Cationic amino acid transporter 4 OS=Mus musculus OX=10090 GN=Slc7a4 PE=1 SV=1	0.104396	0.559936	-0.420095	0.0436568	-0.524491	-0.034726	0.844474	-0.559217	0.0137423
High affinity cationic amino acid transporter 1	Slc7a1	YES	tr|E9Q3N1|E9Q3N1_MOUSE High affinity cationic amino acid transporter 1 (Fragment) OS=Mus musculus OX=10090 GN=Slc7a1 PE=1 SV=8;sp|Q09143|CTR1_MOUSE High affinity cationic amino acid transporter 1 OS=Mus musculus OX=10090 GN=Slc7a1 PE=1 SV=1;tr|D3Z161|D3Z16	0.0755107	0.382882	-0.0787415	0.364031	-0.154252	-0.163355	0.0842043	-0.317608	0.00590864
Sodium- and chloride-dependent taurine transporter	Slc6a6	NO	sp|O35316|SC6A6_MOUSE Sodium- and chloride-dependent taurine transporter OS=Mus musculus OX=10090 GN=Slc6a6 PE=1 SV=2;tr|A0A0U1RQA5|A0A0U1RQA5_MOUSE Transporter (Fragment) OS=Mus musculus OX=10090 GN=Slc6a6 PE=1 SV=1;tr|A0A0U1RP20|A0A0U1RP20_MOUSE Transpor	-0.17684	0.12911	-0.238743	0.0533843	-0.0619032	0.199064	0.0941396	0.137161	0.223741
Sodium-dependent serotonin transporter	Slc6a4	NO	sp|Q60857|SC6A4_MOUSE Sodium-dependent serotonin transporter OS=Mus musculus OX=10090 GN=Slc6a4 PE=1 SV=4	-0.0855881	0.0714119	-0.169053	0.00414076	-0.0834653	0.0363532	0.396519	-0.0471121	0.28029
Sodium-dependent dopamine transporter	Slc6a3	NO	sp|Q61327|SC6A3_MOUSE Sodium-dependent dopamine transporter OS=Mus musculus OX=10090 GN=Slc6a3 PE=1 SV=2	-0.0438296	0.310139	-0.0430175	0.318522	0.000812094	0.199829	0.00163957	0.200641	0.00160292
Anion exchange protein;Sodium bicarbonate cotransporter 3	Slc4a7	YES	tr|A0A286YDJ7|A0A286YDJ7_MOUSE Anion exchange protein OS=Mus musculus OX=10090 GN=Slc4a7 PE=1 SV=1;tr|A0A286YDX4|A0A286YDX4_MOUSE Anion exchange protein OS=Mus musculus OX=10090 GN=Slc4a7 PE=1 SV=1;tr|A0A286YCQ1|A0A286YCQ1_MOUSE Anion exchange protein (Fra	-0.0374105	0.614495	0.0667673	0.378404	0.104178	-0.710029	2.32503e-05	-0.605851	6.46716e-05
Band 3 anion transport protein	Slc4a1	NO	sp|P04919|B3AT_MOUSE Band 3 anion transport protein OS=Mus musculus OX=10090 GN=Slc4a1 PE=1 SV=1	0.489928	4.8159e-05	0.185551	0.0118878	-0.304377	-0.236748	0.00358466	-0.541125	2.5336e-05
Solute carrier family 45 member 4	Slc45a4	YES	tr|F7BEQ1|F7BEQ1_MOUSE Solute carrier family 45 member 4 (Fragment) OS=Mus musculus OX=10090 GN=Slc45a4 PE=1 SV=1;sp|Q0P5V9|S45A4_MOUSE Solute carrier family 45 member 4 OS=Mus musculus OX=10090 GN=Slc45a4 PE=1 SV=1	0.0653626	0.519641	0.252052	0.0350311	0.18669	0.503969	0.00126378	0.690659	0.000194339
Choline transporter-like protein 2	Slc44a2	NO	tr|A0A1L1SVG6|A0A1L1SVG6_MOUSE Choline transporter-like protein 2 OS=Mus musculus OX=10090 GN=Slc44a2 PE=1 SV=1;sp|Q8BY89|CTL2_MOUSE Choline transporter-like protein 2 OS=Mus musculus OX=10090 GN=Slc44a2 PE=1 SV=2	-0.573081	0.000189859	0.439649	0.000928822	1.01273	-0.270478	0.0117438	0.742252	3.69331e-05
Choline transporter-like protein 1	Slc44a1	YES	tr|A2AMH5|A2AMH5_MOUSE Choline transporter-like protein 1 OS=Mus musculus OX=10090 GN=Slc44a1 PE=1 SV=1;tr|A2AMH4|A2AMH4_MOUSE Choline transporter-like protein 1 OS=Mus musculus OX=10090 GN=Slc44a1 PE=1 SV=1;sp|Q6X893|CTL1_MOUSE Choline transporter-like pr	0.586209	1.38207e-05	0.492526	4.28985e-05	-0.0936838	0.160715	0.0211047	0.0670309	0.25576
Solute carrier family 43 member 3	Slc43a3	YES	sp|A2AVZ9|S43A3_MOUSE Solute carrier family 43 member 3 OS=Mus musculus OX=10090 GN=Slc43a3 PE=1 SV=1	0.174702	0.0397647	0.180106	0.0355049	0.00540475	-0.297923	0.00362675	-0.292518	0.00398992
Large neutral amino acids transporter small subunit 4	Slc43a2	YES	tr|Q5ND25|Q5ND25_MOUSE Large neutral amino acids transporter small subunit 4 (Fragment) OS=Mus musculus OX=10090 GN=Slc43a2 PE=4 SV=1;tr|Q5ND24|Q5ND24_MOUSE Large neutral amino acids transporter small subunit 4 (Fragment) OS=Mus musculus OX=10090 GN=Slc43a	-0.162656	0.344375	-0.280786	0.123807	-0.118129	0.289458	0.114432	0.171328	0.320992
Large neutral amino acids transporter small subunit 3	Slc43a1	NO	tr|G3X8X3|G3X8X3_MOUSE Large neutral amino acids transporter small subunit 3 OS=Mus musculus OX=10090 GN=Slc43a1 PE=1 SV=1;tr|A2ATS4|A2ATS4_MOUSE Large neutral amino acids transporter small subunit 3 OS=Mus musculus OX=10090 GN=Slc43a1 PE=1 SV=1;sp|Q8BSM7|	0.389246	2.74832e-05	0.17897	0.00294569	-0.210276	-0.197721	0.00171236	-0.407997	2.02322e-05
Solute carrier family 41 member 3	Slc41a3	YES	tr|G3X937|G3X937_MOUSE Solute carrier family 41 member 3 OS=Mus musculus OX=10090 GN=Slc41a3 PE=1 SV=1;sp|Q921R8|S41A3_MOUSE Solute carrier family 41 member 3 OS=Mus musculus OX=10090 GN=Slc41a3 PE=1 SV=1	-0.0133987	0.845829	0.215873	0.0142684	0.229271	0.320668	0.00196745	0.549939	7.83338e-05
4F2 cell-surface antigen heavy chain	Slc3a2	NO	sp|P10852|4F2_MOUSE 4F2 cell-surface antigen heavy chain OS=Mus musculus OX=10090 GN=Slc3a2 PE=1 SV=1;tr|A0A0U1RP98|A0A0U1RP98_MOUSE 4F2 cell-surface antigen heavy chain (Fragment) OS=Mus musculus OX=10090 GN=Slc3a2 PE=1 SV=1	0.0223487	0.448125	0.0167558	0.565856	-0.0055929	0.0885349	0.0156481	0.082942	0.0207112
Zinc transporter SLC39A7	Slc39a7	YES	sp|Q31125|S39A7_MOUSE Zinc transporter SLC39A7 OS=Mus musculus OX=10090 GN=Slc39a7 PE=1 SV=2	0.0547085	0.7593	0.0466243	0.793799	-0.00808421	0.0922314	0.607822	0.0841471	0.639078
Zinc transporter ZIP6	Slc39a6	NO	sp|Q8C145|S39A6_MOUSE Zinc transporter ZIP6 OS=Mus musculus OX=10090 GN=Slc39a6 PE=1 SV=1;tr|D3Z7N4|D3Z7N4_MOUSE Zinc transporter ZIP6 (Fragment) OS=Mus musculus OX=10090 GN=Slc39a6 PE=1 SV=1	0.216439	0.315744	0.0703012	0.73583	-0.146138	0.435678	0.0664289	0.289539	0.191739
Zinc transporter ZIP4	Slc39a4	NO	tr|A0A2U3TZ56|A0A2U3TZ56_MOUSE Zinc transporter ZIP4 OS=Mus musculus OX=10090 GN=Slc39a4 PE=4 SV=1;sp|Q78IQ7|S39A4_MOUSE Zinc transporter ZIP4 OS=Mus musculus OX=10090 GN=Slc39a4 PE=1 SV=1	0.293534	0.0311688	0.18497	0.133619	-0.108564	0.343995	0.0161991	0.23543	0.0678258
Zinc transporter ZIP13	Slc39a13	NO	sp|Q8BZH0|S39AD_MOUSE Zinc transporter ZIP13 OS=Mus musculus OX=10090 GN=Slc39a13 PE=2 SV=1;tr|B7ZCF3|B7ZCF3_MOUSE Zinc transporter ZIP13 (Fragment) OS=Mus musculus OX=10090 GN=Slc39a13 PE=4 SV=1	-0.716176	0.0247143	-0.277136	0.305589	0.439041	-0.214418	0.420689	0.224623	0.400022
Zinc transporter ZIP11	Slc39a11	YES	sp|Q8BWY7|S39AB_MOUSE Zinc transporter ZIP11 OS=Mus musculus OX=10090 GN=Slc39a11 PE=1 SV=1;tr|B1ARC2|B1ARC2_MOUSE Zinc transporter ZIP11 (Fragment) OS=Mus musculus OX=10090 GN=Slc39a11 PE=1 SV=1	-0.245996	0.00188888	-0.185042	0.00824433	0.0609531	0.331848	0.000332269	0.392801	0.000117338
Zinc transporter ZIP10	Slc39a10	YES	sp|Q6P5F6|S39AA_MOUSE Zinc transporter ZIP10 OS=Mus musculus OX=10090 GN=Slc39a10 PE=1 SV=1;tr|A0A087WRC8|A0A087WRC8_MOUSE Zinc transporter ZIP10 (Fragment) OS=Mus musculus OX=10090 GN=Slc39a10 PE=1 SV=1;tr|A0A087WQF7|A0A087WQF7_MOUSE Zinc transporter ZIP1	-0.205205	0.000511793	-0.223477	0.000306413	-0.0182719	-0.283118	7.01926e-05	-0.30139	4.7057e-05
Zinc transporter ZIP1	Slc39a1	NO	sp|Q9QZ03|S39A1_MOUSE Zinc transporter ZIP1 OS=Mus musculus OX=10090 GN=Slc39a1 PE=2 SV=3	0.199845	0.11689	-0.232253	0.0763888	-0.432098	-0.26781	0.0478738	-0.699908	0.000436956
Putative sodium-coupled neutral amino acid transporter 10	Slc38a10	YES	tr|J3QNE8|J3QNE8_MOUSE Putative sodium-coupled neutral amino acid transporter 10 OS=Mus musculus OX=10090 GN=Slc38a10 PE=1 SV=1;sp|Q5I012|S38AA_MOUSE Putative sodium-coupled neutral amino acid transporter 10 OS=Mus musculus OX=10090 GN=Slc38a10 PE=1 SV=2	-0.147205	0.00529011	-0.0423548	0.287348	0.10485	0.14657	0.00540658	0.25142	0.000258475
	Slc37a4	NO	tr|Q9D1F9|Q9D1F9_MOUSE Solute carrier family 37 (Glucose-6-phosphate transporter), member 4 OS=Mus musculus OX=10090 GN=Slc37a4 PE=1 SV=1;tr|A0A1L1SUI3|A0A1L1SUI3_MOUSE Solute carrier family 37 (glucose-6-phosphate transporter), member 4 OS=Mus musculus OX	0.166709	0.0928905	-0.0931799	0.312589	-0.259889	0.436801	0.00144711	0.176912	0.0779763
Proton-coupled amino acid transporter 1	Slc36a1	YES	tr|Q5F228|Q5F228_MOUSE Proton-coupled amino acid transporter 1 (Fragment) OS=Mus musculus OX=10090 GN=Slc36a1 PE=1 SV=1;sp|Q8K4D3|S36A1_MOUSE Proton-coupled amino acid transporter 1 OS=Mus musculus OX=10090 GN=Slc36a1 PE=2 SV=1	0.0500066	0.759384	-0.144712	0.387483	-0.194718	-0.0213682	0.895565	-0.216086	0.211448
Solute carrier family 35 member E1	Slc35e1	NO	sp|Q8CD26|S35E1_MOUSE Solute carrier family 35 member E1 OS=Mus musculus OX=10090 GN=Slc35e1 PE=1 SV=2	0.0114394	0.886292	0.0184054	0.818254	0.00696601	0.183491	0.0493594	0.190457	0.043265
Solute carrier family 35 member D3	Slc35d3	YES	sp|Q8BGF8|S35D3_MOUSE Solute carrier family 35 member D3 OS=Mus musculus OX=10090 GN=Slc35d3 PE=2 SV=1	-0.0450239	0.302746	-0.0993213	0.0441504	-0.0542974	-0.238611	0.00062903	-0.292908	0.000182011
UDP-N-acetylglucosamine/UDP-glucose/GDP-mannose transporter	Slc35d2	NO	tr|A0A0R4J181|A0A0R4J181_MOUSE UDP-N-acetylglucosamine/UDP-glucose/GDP-mannose transporter OS=Mus musculus OX=10090 GN=Slc35d2 PE=1 SV=1;sp|Q762D5|S35D2_MOUSE UDP-N-acetylglucosamine/UDP-glucose/GDP-mannose transporter OS=Mus musculus OX=10090 GN=Slc35d2 P	-0.157331	0.0387267	0.0627042	0.344382	0.220035	0.11466	0.106423	0.334695	0.00103434
GDP-fucose transporter 1	Slc35c1	NO	tr|Q8R2I1|Q8R2I1_MOUSE GDP-fucose transporter 1 OS=Mus musculus OX=10090 GN=Slc35c1 PE=1 SV=1;sp|Q8BLX4|FUCT1_MOUSE GDP-fucose transporter 1 OS=Mus musculus OX=10090 GN=Slc35c1 PE=2 SV=1	-0.0164368	0.662301	-0.0969577	0.0314504	-0.0805209	0.302064	7.2793e-05	0.221543	0.000493503
UDP-xylose and UDP-N-acetylglucosamine transporter	Slc35b4	YES	sp|Q8CIA5|S35B4_MOUSE UDP-xylose and UDP-N-acetylglucosamine transporter OS=Mus musculus OX=10090 GN=Slc35b4 PE=2 SV=2	-0.0504725	0.64367	-0.00550254	0.959451	0.0449699	0.400602	0.00655568	0.445572	0.00382085
Adenosine 3-phospho 5-phosphosulfate transporter 2	Slc35b3	YES	tr|F8WGD7|F8WGD7_MOUSE Adenosine 3-phospho 5-phosphosulfate transporter 2 OS=Mus musculus OX=10090 GN=Slc35b3 PE=1 SV=1;sp|Q922Q5|S35B3_MOUSE Adenosine 3-phospho 5-phosphosulfate transporter 2 OS=Mus musculus OX=10090 GN=Slc35b3 PE=2 SV=1;tr|A0A286YCU5	-0.00963701	0.889933	0.10072	0.177717	0.110357	-0.140722	0.0747768	-0.0303651	0.66485
Adenosine 3-phospho 5-phosphosulfate transporter 1	Slc35b2	NO	sp|Q91ZN5|S35B2_MOUSE Adenosine 3-phospho 5-phosphosulfate transporter 1 OS=Mus musculus OX=10090 GN=Slc35b2 PE=1 SV=1;tr|A0A286YE16|A0A286YE16_MOUSE Adenosine 3-phospho 5-phosphosulfate transporter 1 (Fragment) OS=Mus musculus OX=10090 GN=Slc35b2 PE=1	-0.159661	0.115318	-0.0447198	0.629678	0.114942	0.111	0.251311	0.225942	0.0386195
	Slc35a4	NO	tr|A0A087WQH8|A0A087WQH8_MOUSE Probable UDP-sugar transporter protein SLC35A4 OS=Mus musculus OX=10090 GN=Slc35a4 PE=1 SV=1	-0.1136	0.186834	-0.0107448	0.893729	0.102855	0.0859588	0.304654	0.188814	0.0455166
	Slc35a3	YES	tr|E9Q3V2|E9Q3V2_MOUSE UDP-N-acetylglucosamine transporter (Fragment) OS=Mus musculus OX=10090 GN=Slc35a3 PE=1 SV=1	0.0987427	0.243237	-0.0281445	0.726995	-0.126887	0.117959	0.171864	-0.00892768	0.911447
UDP-N-acetylglucosamine transporter	Slc35a3	YES	sp|Q8R1T4|S35A3_MOUSE UDP-N-acetylglucosamine transporter OS=Mus musculus OX=10090 GN=Slc35a3 PE=2 SV=1;tr|A0A0G2JDH8|A0A0G2JDH8_MOUSE UDP-N-acetylglucosamine transporter (Fragment) OS=Mus musculus OX=10090 GN=Slc35a3 PE=1 SV=1;tr|D3YXZ7|D3YXZ7_MOUSE UDP-N	-0.338618	0.00614358	0.0405618	0.655701	0.37918	0.381879	0.00331726	0.761058	5.57774e-05
UDP-galactose translocator	Slc35a2	NO	tr|A0A140LI17|A0A140LI17_MOUSE UDP-galactose translocator OS=Mus musculus OX=10090 GN=Slc35a2 PE=1 SV=1;tr|A2AER4|A2AER4_MOUSE UDP-galactose translocator OS=Mus musculus OX=10090 GN=Slc35a2 PE=1 SV=1;sp|Q9R0M8|S35A2_MOUSE UDP-galactose translocator OS=Mus	0.0605105	0.341918	0.127708	0.0687591	0.0671978	-0.172504	0.0230254	-0.105306	0.119578
CMP-sialic acid transporter	Slc35a1	YES	sp|Q61420|S35A1_MOUSE CMP-sialic acid transporter OS=Mus musculus OX=10090 GN=Slc35a1 PE=1 SV=2	-0.214327	0.218532	0.139977	0.406451	0.354304	0.0547339	0.739906	0.409038	0.0367302
Acetyl-coenzyme A transporter 1	Slc33a1	YES	sp|Q99J27|ACATN_MOUSE Acetyl-coenzyme A transporter 1 OS=Mus musculus OX=10090 GN=Slc33a1 PE=1 SV=1	0.0851405	0.0238179	-0.0245012	0.434132	-0.109642	0.265284	4.65374e-05	0.155643	0.00120473
Zinc transporter 9	Slc30a9	YES	sp|Q5IRJ6|ZNT9_MOUSE Zinc transporter 9 OS=Mus musculus OX=10090 GN=Slc30a9 PE=1 SV=2;tr|F8WHL1|F8WHL1_MOUSE Zinc transporter 9 OS=Mus musculus OX=10090 GN=Slc30a9 PE=1 SV=1	-0.0392251	0.440868	-0.0209236	0.676048	0.0183015	0.194177	0.00502375	0.212478	0.00314796
Zinc transporter 7	Slc30a7	YES	sp|Q9JKN1|ZNT7_MOUSE Zinc transporter 7 OS=Mus musculus OX=10090 GN=Slc30a7 PE=1 SV=1	-0.0234015	0.714122	-0.103926	0.134406	-0.0805242	0.454963	0.000156555	0.374439	0.00051284
Zinc transporter 6	Slc30a6	NO	tr|J3QMX8|J3QMX8_MOUSE Zinc transporter 6 OS=Mus musculus OX=10090 GN=Slc30a6 PE=1 SV=1;sp|Q8BJM5|ZNT6_MOUSE Zinc transporter 6 OS=Mus musculus OX=10090 GN=Slc30a6 PE=1 SV=1	0.126327	0.0200708	0.0697134	0.141612	-0.0566132	0.51546	6.08934e-06	0.458847	1.31337e-05
Zinc transporter 5	Slc30a5	YES	sp|Q8R4H9|ZNT5_MOUSE Zinc transporter 5 OS=Mus musculus OX=10090 GN=Slc30a5 PE=1 SV=1;tr|A0A286YDV6|A0A286YDV6_MOUSE Zinc transporter 5 OS=Mus musculus OX=10090 GN=Slc30a5 PE=1 SV=1	0.291397	0.0102033	-0.130084	0.162689	-0.421481	0.269581	0.0145511	-0.1519	0.111376
Zinc transporter 1	Slc30a1	NO	sp|Q60738|ZNT1_MOUSE Zinc transporter 1 OS=Mus musculus OX=10090 GN=Slc30a1 PE=1 SV=1	-0.0586123	0.151968	-0.00891605	0.813623	0.0496963	-0.00683507	0.856455	0.0428612	0.277984
	Slc2a9	NO	tr|B9EHN5|B9EHN5_MOUSE Slc2a9 protein OS=Mus musculus OX=10090 GN=Slc2a9 PE=1 SV=1;tr|Q3T9X0|Q3T9X0_MOUSE Solute carrier family 2 (facilitated glucose transporter), member 9 OS=Mus musculus OX=10090 GN=Slc2a9 PE=1 SV=1	-0.154665	0.322971	-0.197145	0.217563	-0.0424795	0.367685	0.0396516	0.325206	0.0607662
Solute carrier family 2, facilitated glucose transporter member 3	Slc2a3	YES	sp|P32037|GTR3_MOUSE Solute carrier family 2, facilitated glucose transporter member 3 OS=Mus musculus OX=10090 GN=Slc2a3 PE=1 SV=1	-0.059792	0.573119	-0.0780705	0.465628	-0.0182786	0.419295	0.00443782	0.401016	0.0055656
Solute carrier family 2, facilitated glucose transporter member 1	Slc2a1	YES	sp|P17809|GTR1_MOUSE Solute carrier family 2, facilitated glucose transporter member 1 OS=Mus musculus OX=10090 GN=Slc2a1 PE=1 SV=4	-0.00475652	0.949346	-0.0768197	0.323162	-0.0720632	0.275861	0.00670464	0.203798	0.0260431
Equilibrative nucleoside transporter 1	Slc29a1	YES	tr|E9PXM6|E9PXM6_MOUSE Equilibrative nucleoside transporter 1 OS=Mus musculus OX=10090 GN=Slc29a1 PE=1 SV=1;sp|Q9JIM1|S29A1_MOUSE Equilibrative nucleoside transporter 1 OS=Mus musculus OX=10090 GN=Slc29a1 PE=1 SV=3;tr|E9PWY7|E9PWY7_MOUSE Equilibrative nucl	0.316058	0.0426095	-0.0591119	0.656944	-0.37517	0.0262506	0.842704	-0.348919	0.0293538
Long-chain fatty acid transport protein 4	Slc27a4	NO	sp|Q91VE0|S27A4_MOUSE Long-chain fatty acid transport protein 4 OS=Mus musculus OX=10090 GN=Slc27a4 PE=1 SV=1	-0.0685505	0.107417	-0.0904455	0.0452	-0.021895	0.181274	0.00183979	0.159379	0.00367776
Very long-chain acyl-CoA synthetase	Slc27a2	YES	sp|O35488|S27A2_MOUSE Very long-chain acyl-CoA synthetase OS=Mus musculus OX=10090 GN=Slc27a2 PE=1 SV=2;tr|A2ANX6|A2ANX6_MOUSE Very long-chain acyl-CoA synthetase OS=Mus musculus OX=10090 GN=Slc27a2 PE=1 SV=2	-0.0145068	0.752972	-0.0633935	0.195998	-0.0488867	0.15949	0.00892727	0.110603	0.0416013
Solute carrier family 25 member 51	Slc25a51	YES	tr|A2AKW0|A2AKW0_MOUSE Solute carrier family 25 member 51 OS=Mus musculus OX=10090 GN=Slc25a51 PE=1 SV=1;sp|Q5HZI9|S2551_MOUSE Solute carrier family 25 member 51 OS=Mus musculus OX=10090 GN=Slc25a51 PE=1 SV=1;tr|G3UYJ3|G3UYJ3_MOUSE Solute carrier family 25	0.0405347	0.533711	0.0117644	0.854713	-0.0287702	0.15805	0.0383261	0.129279	0.0756343
ADP/ATP translocase 2;ADP/ATP translocase 2, N-terminally processed	Slc25a5	YES	sp|P51881|ADT2_MOUSE ADP/ATP translocase 2 OS=Mus musculus OX=10090 GN=Slc25a5 PE=1 SV=3	-0.036227	0.287024	-0.0220449	0.505656	0.0141822	0.134363	0.00377515	0.148545	0.00220987
Solute carrier family 25 member 46	Slc25a46	YES	sp|Q9CQS4|S2546_MOUSE Solute carrier family 25 member 46 OS=Mus musculus OX=10090 GN=Slc25a46 PE=1 SV=1	-0.131689	0.00550402	-0.0111598	0.746235	0.120529	-0.00642885	0.851721	0.114101	0.0110027
Solute carrier family 25 member 45	Slc25a45	NO	sp|Q8CFJ7|S2545_MOUSE Solute carrier family 25 member 45 OS=Mus musculus OX=10090 GN=Slc25a45 PE=1 SV=1;tr|D3Z5G2|D3Z5G2_MOUSE Solute carrier family 25 member 45 (Fragment) OS=Mus musculus OX=10090 GN=Slc25a45 PE=1 SV=1	0.0151637	0.772241	0.0113101	0.828837	-0.00385368	0.204313	0.00496872	0.200459	0.00547087
Mitochondrial coenzyme A transporter SLC25A42	Slc25a42	NO	sp|Q8R0Y8|S2542_MOUSE Mitochondrial coenzyme A transporter SLC25A42 OS=Mus musculus OX=10090 GN=Slc25a42 PE=1 SV=1	0.010014	0.895643	0.0328269	0.669197	0.0228129	-0.0305428	0.690708	-0.00772992	0.919331
Solute carrier family 25 member 40	Slc25a40	NO	sp|Q8BGP6|S2540_MOUSE Solute carrier family 25 member 40 OS=Mus musculus OX=10090 GN=Slc25a40 PE=1 SV=1	-0.0537671	0.384016	0.0543606	0.379085	0.108128	-0.0252889	0.675357	0.0828388	0.195823
ADP/ATP translocase 1	Slc25a4	NO	sp|P48962|ADT1_MOUSE ADP/ATP translocase 1 OS=Mus musculus OX=10090 GN=Slc25a4 PE=1 SV=4	-0.0930547	0.0195352	-0.0524195	0.132626	0.0406351	0.14112	0.0026044	0.181756	0.0006233
Solute carrier family 25 member 35	Slc25a35	NO	sp|Q5SWT3|S2535_MOUSE Solute carrier family 25 member 35 OS=Mus musculus OX=10090 GN=Slc25a35 PE=1 SV=2;tr|A0A0A0MQ70|A0A0A0MQ70_MOUSE Solute carrier family 25 member 35 OS=Mus musculus OX=10090 GN=Slc25a35 PE=1 SV=1	-0.157802	0.017048	0.0771274	0.171247	0.23493	-0.0970912	0.0966268	0.137839	0.0297873
Phosphate carrier protein, mitochondrial	Slc25a3	YES	sp|Q8VEM8|MPCP_MOUSE Phosphate carrier protein, mitochondrial OS=Mus musculus OX=10090 GN=Slc25a3 PE=1 SV=1;tr|G5E902|G5E902_MOUSE MCG10343, isoform CRA_b OS=Mus musculus OX=10090 GN=Slc25a3 PE=1 SV=1	0.0496624	0.271666	-0.0616828	0.182027	-0.111345	0.235193	0.000805265	0.123848	0.0208656
Calcium-binding mitochondrial carrier protein SCaMC-2	Slc25a25	YES	sp|A2ASZ8|SCMC2_MOUSE Calcium-binding mitochondrial carrier protein SCaMC-2 OS=Mus musculus OX=10090 GN=Slc25a25 PE=1 SV=1;tr|Z4YLR9|Z4YLR9_MOUSE Calcium-binding mitochondrial carrier protein SCaMC-2 (Fragment) OS=Mus musculus OX=10090 GN=Slc25a25 PE=1 SV=	0.0923292	0.0141423	0.217833	0.000125519	0.125504	0.113991	0.00517594	0.239495	6.89634e-05
Calcium-binding mitochondrial carrier protein SCaMC-1	Slc25a24	NO	sp|Q8BMD8|SCMC1_MOUSE Calcium-binding mitochondrial carrier protein SCaMC-1 OS=Mus musculus OX=10090 GN=Slc25a24 PE=1 SV=1	0.0880668	0.0969962	0.42483	3.85097e-05	0.336763	0.122142	0.032778	0.458905	2.33554e-05
Mitochondrial glutamate carrier 1	Slc25a22	NO	tr|E9PY45|E9PY45_MOUSE Mitochondrial glutamate carrier 1 (Fragment) OS=Mus musculus OX=10090 GN=Slc25a22 PE=1 SV=4;sp|Q9D6M3|GHC1_MOUSE Mitochondrial glutamate carrier 1 OS=Mus musculus OX=10090 GN=Slc25a22 PE=1 SV=1;tr|E9PV90|E9PV90_MOUSE Mitochondrial gl	-0.092201	0.134366	-0.11687	0.0692137	-0.0246688	0.133302	0.0444673	0.108634	0.0864517
Mitochondrial carnitine/acylcarnitine carrier protein	Slc25a20	NO	sp|Q9Z2Z6|MCAT_MOUSE Mitochondrial carnitine/acylcarnitine carrier protein OS=Mus musculus OX=10090 GN=Slc25a20 PE=1 SV=1	-0.0763122	0.109485	-0.0131087	0.761737	0.0632035	0.122868	0.0215286	0.186071	0.00297001
Mitochondrial thiamine pyrophosphate carrier	Slc25a19	NO	tr|A2A9V7|A2A9V7_MOUSE Mitochondrial thiamine pyrophosphate carrier (Fragment) OS=Mus musculus OX=10090 GN=Slc25a19 PE=1 SV=8;sp|Q9DAM5|TPC_MOUSE Mitochondrial thiamine pyrophosphate carrier OS=Mus musculus OX=10090 GN=Slc25a19 PE=1 SV=1	-0.110059	0.343715	0.0377169	0.737979	0.147776	0.0671982	0.554797	0.214974	0.0880455
Peroxisomal membrane protein PMP34	Slc25a17	YES	sp|O70579|PM34_MOUSE Peroxisomal membrane protein PMP34 OS=Mus musculus OX=10090 GN=Slc25a17 PE=1 SV=1	-0.0392602	0.571761	0.148517	0.0601206	0.187778	-0.175473	0.0332148	0.012305	0.857778
Graves disease carrier protein homolog	Slc25a16	YES	tr|D3YVC9|D3YVC9_MOUSE Graves disease carrier protein homolog (Fragment) OS=Mus musculus OX=10090 GN=Slc25a16 PE=1 SV=1;sp|Q8C0K5|GDC_MOUSE Graves disease carrier protein homolog OS=Mus musculus OX=10090 GN=Slc25a16 PE=1 SV=1	0.0549395	0.557437	0.00395182	0.965894	-0.0509877	-0.0766071	0.418944	-0.127595	0.195965
Mitochondrial ornithine transporter 1	Slc25a15	NO	sp|Q9WVD5|ORNT1_MOUSE Mitochondrial ornithine transporter 1 OS=Mus musculus OX=10090 GN=Slc25a15 PE=1 SV=1	-0.0758784	0.237082	-0.11475	0.0916844	-0.0388712	0.314333	0.00109605	0.275461	0.00228949
Calcium-binding mitochondrial carrier protein Aralar2	Slc25a13	YES	sp|Q9QXX4|CMC2_MOUSE Calcium-binding mitochondrial carrier protein Aralar2 OS=Mus musculus OX=10090 GN=Slc25a13 PE=1 SV=1	-0.0235067	0.599851	0.0960452	0.0600516	0.119552	0.143328	0.0124652	0.26288	0.00049376
Calcium-binding mitochondrial carrier protein Aralar1	Slc25a12	YES	sp|Q8BH59|CMC1_MOUSE Calcium-binding mitochondrial carrier protein Aralar1 OS=Mus musculus OX=10090 GN=Slc25a12 PE=1 SV=1	-0.197188	9.64345e-05	-0.129436	0.00121928	0.067752	0.118774	0.00197153	0.186526	0.000136729
Mitochondrial 2-oxoglutarate/malate carrier protein	Slc25a11	YES	sp|Q9CR62|M2OM_MOUSE Mitochondrial 2-oxoglutarate/malate carrier protein OS=Mus musculus OX=10090 GN=Slc25a11 PE=1 SV=3;tr|Q5SX46|Q5SX46_MOUSE Mitochondrial 2-oxoglutarate/malate carrier protein (Fragment) OS=Mus musculus OX=10090 GN=Slc25a11 PE=1 SV=1	-0.166271	0.00195221	-0.133996	0.00606013	0.0322753	0.175943	0.00142534	0.208218	0.000538097
Mitochondrial dicarboxylate carrier	Slc25a10	NO	sp|Q9QZD8|DIC_MOUSE Mitochondrial dicarboxylate carrier OS=Mus musculus OX=10090 GN=Slc25a10 PE=1 SV=2	-0.0236821	0.47302	0.0458378	0.185885	0.0695199	0.155723	0.00164547	0.225243	0.000186115
Tricarboxylate transport protein, mitochondrial	Slc25a1	NO	sp|Q8JZU2|TXTP_MOUSE Tricarboxylate transport protein, mitochondrial OS=Mus musculus OX=10090 GN=Slc25a1 PE=1 SV=1;tr|F6VVY4|F6VVY4_MOUSE Tricarboxylate transport protein, mitochondrial (Fragment) OS=Mus musculus OX=10090 GN=Slc25a1 PE=1 SV=1	-0.221002	0.000343321	-0.135787	0.00524848	0.0852146	0.0665243	0.0905917	0.151739	0.00294776
Sodium/potassium/calcium exchanger 5	Slc24a5	NO	sp|Q8C261|NCKX5_MOUSE Sodium/potassium/calcium exchanger 5 OS=Mus musculus OX=10090 GN=Slc24a5 PE=2 SV=1	-0.0604397	0.482683	-0.0505699	0.554757	0.00986976	0.0825039	0.34542	0.0923736	0.294735
Sodium/potassium/calcium exchanger 3	Slc24a3	NO	sp|Q99PD7|NCKX3_MOUSE Sodium/potassium/calcium exchanger 3 OS=Mus musculus OX=10090 GN=Slc24a3 PE=1 SV=3;tr|Q8VD29|Q8VD29_MOUSE Sodium/potassium/calcium exchanger 3 OS=Mus musculus OX=10090 GN=Slc24a3 PE=1 SV=1	0.0174237	0.687713	-0.068352	0.144543	-0.0857756	0.0954909	0.0556295	0.00971532	0.82191
Solute carrier family 22 member 23	Slc22a23	NO	tr|F7BP73|F7BP73_MOUSE Solute carrier family 22 member 23 (Fragment) OS=Mus musculus OX=10090 GN=Slc22a23 PE=1 SV=1;sp|Q3UHH2|S22AN_MOUSE Solute carrier family 22 member 23 OS=Mus musculus OX=10090 GN=Slc22a23 PE=2 SV=1	0.0138974	0.848375	-0.0871831	0.25363	-0.101081	0.167462	0.0485031	0.0663815	0.375053
Sodium-dependent phosphate transporter 2	Slc20a2	YES	sp|Q80UP8|S20A2_MOUSE Sodium-dependent phosphate transporter 2 OS=Mus musculus OX=10090 GN=Slc20a2 PE=1 SV=2	0.0652137	0.157201	0.0639818	0.164088	-0.00123185	-0.54576	3.5964e-06	-0.546992	3.54266e-06
Amino acid transporter;Neutral amino acid transporter B(0)	Slc1a5	NO	tr|Q9ESU7|Q9ESU7_MOUSE Amino acid transporter OS=Mus musculus OX=10090 GN=Slc1a5 PE=1 SV=1;sp|P51912|AAAT_MOUSE Neutral amino acid transporter B(0) OS=Mus musculus OX=10090 GN=Slc1a5 PE=1 SV=2	-0.168357	0.056829	-0.131127	0.119111	0.0372303	-0.218938	0.0211408	-0.181708	0.0436163
Synaptic vesicular amine transporter	Slc18a2	YES	sp|Q8BRU6|VMAT2_MOUSE Synaptic vesicular amine transporter OS=Mus musculus OX=10090 GN=Slc18a2 PE=1 SV=1	-0.0848405	0.159228	-0.00557842	0.92033	0.0792621	-0.0403232	0.478122	0.038939	0.492808
Sialin	Slc17a5	YES	sp|Q8BN82|S17A5_MOUSE Sialin OS=Mus musculus OX=10090 GN=Slc17a5 PE=1 SV=2	-0.0855297	0.15012	-0.0450446	0.422516	0.0404851	0.0624928	0.276033	0.102978	0.0928701
Monocarboxylate transporter 4	Slc16a3	NO	sp|P57787|MOT4_MOUSE Monocarboxylate transporter 4 OS=Mus musculus OX=10090 GN=Slc16a3 PE=1 SV=1;tr|B1ATM2|B1ATM2_MOUSE Monocarboxylate transporter 4 (Fragment) OS=Mus musculus OX=10090 GN=Slc16a3 PE=1 SV=1	-0.0534334	0.193269	-0.0627478	0.134963	-0.0093144	0.195081	0.00122112	0.185766	0.00160823
Monocarboxylate transporter 10	Slc16a10	YES	sp|Q3U9N9|MOT10_MOUSE Monocarboxylate transporter 10 OS=Mus musculus OX=10090 GN=Slc16a10 PE=1 SV=1;tr|A0A1L1SVB8|A0A1L1SVB8_MOUSE Monocarboxylate transporter 10 (Fragment) OS=Mus musculus OX=10090 GN=Slc16a10 PE=4 SV=1	0.2949	0.000536138	0.384695	0.000105166	0.0897956	-0.248187	0.00145294	-0.158391	0.0141959
Monocarboxylate transporter 1	Slc16a1	NO	sp|P53986|MOT1_MOUSE Monocarboxylate transporter 1 OS=Mus musculus OX=10090 GN=Slc16a1 PE=1 SV=1	0.480845	0.000197221	0.104225	0.16567	-0.37662	0.0765803	0.292739	-0.30004	0.00302676
Solute carrier family 15 member 4	Slc15a4	NO	sp|Q91W98|S15A4_MOUSE Solute carrier family 15 member 4 OS=Mus musculus OX=10090 GN=Slc15a4 PE=1 SV=1	0.0100145	0.878131	-0.122741	0.0926964	-0.132755	-0.0580758	0.387239	-0.190831	0.0193679
Urea transporter 2	Slc14a2	NO	tr|G5E849|G5E849_MOUSE MCG15475, isoform CRA_a OS=Mus musculus OX=10090 GN=Slc14a2 PE=1 SV=1;sp|Q8R4T9|UT2_MOUSE Urea transporter 2 OS=Mus musculus OX=10090 GN=Slc14a2 PE=1 SV=2	-0.109133	0.0387672	-0.0774785	0.114224	0.0316544	0.128243	0.0204997	0.159898	0.0075376
Urea transporter 1	Slc14a1	NO	sp|Q8VHL0|UT1_MOUSE Urea transporter 1 OS=Mus musculus OX=10090 GN=Slc14a1 PE=1 SV=2	-0.0612657	0.276046	-0.255322	0.00176256	-0.194057	0.3383	0.000343399	0.144243	0.0274902
Solute carrier family 12 member 9	Slc12a9	YES	sp|Q99MR3|S12A9_MOUSE Solute carrier family 12 member 9 OS=Mus musculus OX=10090 GN=Slc12a9 PE=1 SV=2	-0.267955	0.00930759	-0.174621	0.0533972	0.0933343	0.26408	0.00996872	0.357415	0.00213256
Solute carrier family 12 member 6	Slc12a6	YES	sp|Q924N4|S12A6_MOUSE Solute carrier family 12 member 6 OS=Mus musculus OX=10090 GN=Slc12a6 PE=1 SV=2;tr|Q6P6P5|Q6P6P5_MOUSE Slc12a6 protein OS=Mus musculus OX=10090 GN=Gm21985 PE=2 SV=1;tr|Q3V0N8|Q3V0N8_MOUSE Solute carrier family 12 member 6 OS=Mus muscu	0.0347089	0.403373	0.0469646	0.268103	0.0122557	-0.142832	0.00823009	-0.130576	0.0125199
Solute carrier family 12 member 2	Slc12a2	NO	tr|E9QM38|E9QM38_MOUSE Solute carrier family 12 member 2 OS=Mus musculus OX=10090 GN=Slc12a2 PE=1 SV=1;sp|P55012|S12A2_MOUSE Solute carrier family 12 member 2 OS=Mus musculus OX=10090 GN=Slc12a2 PE=1 SV=2	0.0708136	0.137182	-0.0469678	0.302108	-0.117781	0.0647413	0.168736	-0.0530401	0.248828
Natural resistance-associated macrophage protein 2	Slc11a2	NO	sp|P49282|NRAM2_MOUSE Natural resistance-associated macrophage protein 2 OS=Mus musculus OX=10090 GN=Slc11a2 PE=1 SV=2	-0.220603	0.777196	-1.03651	0.209817	-0.815908	1.14514	0.171028	0.329231	0.673944
Sodium/bile acid cotransporter 7	Slc10a7	NO	sp|Q5PT53|NTCP7_MOUSE Sodium/bile acid cotransporter 7 OS=Mus musculus OX=10090 GN=Slc10a7 PE=2 SV=1	0.0770204	0.198126	0.118605	0.0649773	0.0415845	0.0413291	0.470212	0.0829136	0.169825
Signaling lymphocytic activation molecule	Slamf1	NO	sp|Q9QUM4|SLAF1_MOUSE Signaling lymphocytic activation molecule OS=Mus musculus OX=10090 GN=Slamf1 PE=1 SV=1	0.0483918	0.266047	-0.0293914	0.486585	-0.0777833	0.139683	0.0103076	0.0618999	0.166169
SLAIN motif-containing protein 2	Slain2	YES	sp|Q8CI08|SLAI2_MOUSE SLAIN motif-containing protein 2 OS=Mus musculus OX=10090 GN=Slain2 PE=1 SV=2	0.336095	0.000166013	0.253051	0.000913391	-0.0830444	-0.843618	3.91422e-07	-0.926662	2.06775e-07
Src-like-adapter 2	Sla2	NO	sp|Q8R4L0|SLAP2_MOUSE Src-like-adapter 2 OS=Mus musculus OX=10090 GN=Sla2 PE=1 SV=3	-0.0215634	0.554724	-0.0344619	0.354684	-0.0128985	-0.0290603	0.430867	-0.0419588	0.266861
Src-like-adapter	Sla	NO	tr|A0A0R4J247|A0A0R4J247_MOUSE Src-like adaptor, isoform CRA_a OS=Mus musculus OX=10090 GN=Sla PE=1 SV=1;sp|Q60898|SLAP1_MOUSE Src-like-adapter OS=Mus musculus OX=10090 GN=Sla PE=1 SV=3	-0.0503753	0.405131	-0.106379	0.103912	-0.0560039	-0.201315	0.00964027	-0.257319	0.00279618
S-phase kinase-associated protein 1	Skp1	NO	sp|Q9WTX5|SKP1_MOUSE S-phase kinase-associated protein 1 OS=Mus musculus OX=10090 GN=Skp1 PE=1 SV=3	0.0868796	0.183888	0.0223623	0.715333	-0.0645173	0.175263	0.0208775	0.110746	0.102413
	Skiv2l	NO	tr|Q6NZR5|Q6NZR5_MOUSE Superkiller viralicidic activity 2-like (S. cerevisiae) OS=Mus musculus OX=10090 GN=Skiv2l PE=1 SV=1	0.0244817	0.440552	-0.0543227	0.11287	-0.0788043	0.0534733	0.117637	-0.0253311	0.42558
Selection and upkeep of intraepithelial T-cells protein 5	Skint5	NO	tr|K4DID5|K4DID5_MOUSE Selection and upkeep of intraepithelial T-cells protein 5 OS=Mus musculus OX=10090 GN=Skint5 PE=4 SV=1;tr|E9Q4T3|E9Q4T3_MOUSE Selection and upkeep of intraepithelial T-cells protein 5 OS=Mus musculus OX=10090 GN=Skint5 PE=4 SV=1;tr|E	-0.522128	0.0598169	1.81298	0.000114015	2.33511	-0.239676	0.336763	2.09544	4.54106e-05
Ski oncogene	Ski	NO	tr|B1AUF2|B1AUF2_MOUSE Ski oncogene OS=Mus musculus OX=10090 GN=Ski PE=1 SV=1;tr|B1AUF1|B1AUF1_MOUSE Ski oncogene OS=Mus musculus OX=10090 GN=Ski PE=1 SV=1;sp|Q60698|SKI_MOUSE Ski oncogene OS=Mus musculus OX=10090 GN=Ski PE=1 SV=2	-0.0923598	0.517546	-0.0122108	0.930731	0.080149	-0.184916	0.215009	-0.104767	0.464909
Src kinase-associated phosphoprotein 2	Skap2	NO	sp|Q3UND0|SKAP2_MOUSE Src kinase-associated phosphoprotein 2 OS=Mus musculus OX=10090 GN=Skap2 PE=1 SV=2	0.143928	0.0929066	0.0542305	0.486984	-0.0896971	-0.109259	0.183169	-0.198956	0.0313103
NAD-dependent protein deacylase sirtuin-5, mitochondrial	Sirt5	NO	sp|Q8K2C6|SIR5_MOUSE NAD-dependent protein deacylase sirtuin-5, mitochondrial OS=Mus musculus OX=10090 GN=Sirt5 PE=1 SV=1;tr|A0A1Y7VJY8|A0A1Y7VJY8_MOUSE NAD-dependent protein deacylase sirtuin-5, mitochondrial OS=Mus musculus OX=10090 GN=Sirt5 PE=1 SV=1;tr	0.0679398	0.0623111	0.0195845	0.542712	-0.0483553	0.060577	0.0887181	0.0122217	0.701596
NAD-dependent protein deacetylase sirtuin-2	Sirt2	NO	tr|A0A140LHL5|A0A140LHL5_MOUSE NAD-dependent protein deacetylase OS=Mus musculus OX=10090 GN=Sirt2 PE=1 SV=1;sp|Q8VDQ8|SIR2_MOUSE NAD-dependent protein deacetylase sirtuin-2 OS=Mus musculus OX=10090 GN=Sirt2 PE=1 SV=2	-0.0191567	0.600065	-0.0162378	0.655794	0.00291894	0.00720756	0.842213	0.0101265	0.780039
Signal-induced proliferation-associated protein 1	Sipa1	NO	tr|E9Q0Y4|E9Q0Y4_MOUSE Signal-induced proliferation-associated protein 1 OS=Mus musculus OX=10090 GN=Sipa1 PE=1 SV=1;sp|P46062|SIPA1_MOUSE Signal-induced proliferation-associated protein 1 OS=Mus musculus OX=10090 GN=Sipa1 PE=1 SV=2	-0.265155	0.00336197	-0.298588	0.00176866	-0.0334324	0.14335	0.0504601	0.109917	0.113245
Nucleotide exchange factor SIL1	Sil1	NO	sp|Q9EPK6|SIL1_MOUSE Nucleotide exchange factor SIL1 OS=Mus musculus OX=10090 GN=Sil1 PE=1 SV=2	-0.773338	0.000692861	-0.0274149	0.842898	0.745923	-1.39715	1.71299e-05	-0.651232	0.00184493
Suppressor of IKBKE 1	Sike1	YES	sp|Q9CPR7|SIKE1_MOUSE Suppressor of IKBKE 1 OS=Mus musculus OX=10090 GN=Sike1 PE=1 SV=1;tr|D3YTU7|D3YTU7_MOUSE Suppressor of IKBKE 1 OS=Mus musculus OX=10090 GN=Sike1 PE=1 SV=1	-0.0180281	0.684939	0.00615892	0.889145	0.024187	-0.0192745	0.664728	0.00491253	0.911451
Serine/threonine-protein kinase SIK3	Sik3	NO	tr|F6S7W6|F6S7W6_MOUSE Serine/threonine-protein kinase SIK3 (Fragment) OS=Mus musculus OX=10090 GN=Sik3 PE=1 SV=1;tr|E9PU87|E9PU87_MOUSE Serine/threonine-protein kinase SIK3 OS=Mus musculus OX=10090 GN=Sik3 PE=1 SV=1;sp|Q6P4S6|SIK3_MOUSE Serine/threonine-p	0.124991	0.0151705	0.116759	0.0203525	-0.00823214	-0.168463	0.00357337	-0.176696	0.00277501
Serine/threonine-protein kinase SIK2	Sik2	NO	tr|H3BJC9|H3BJC9_MOUSE Serine/threonine-protein kinase SIK2 OS=Mus musculus OX=10090 GN=Sik2 PE=1 SV=1;tr|H3BKG1|H3BKG1_MOUSE Serine/threonine-protein kinase SIK2 OS=Mus musculus OX=10090 GN=Sik2 PE=1 SV=1;tr|F8VPT7|F8VPT7_MOUSE Serine/threonine-protein ki	-0.0194985	0.873605	0.0664526	0.591474	0.0859512	-0.301456	0.0384001	-0.215505	0.111387
Sigma non-opioid intracellular receptor 1	Sigmar1	NO	sp|O55242|SGMR1_MOUSE Sigma non-opioid intracellular receptor 1 OS=Mus musculus OX=10090 GN=Sigmar1 PE=1 SV=1	-0.31874	0.000364969	-0.0296109	0.567284	0.289129	-0.114447	0.0537706	0.174682	0.00963833
Single Ig IL-1-related receptor	Sigirr	NO	sp|Q9JLZ8|SIGIR_MOUSE Single Ig IL-1-related receptor OS=Mus musculus OX=10090 GN=Sigirr PE=1 SV=2	0.00665353	0.87532	-0.0552464	0.218979	-0.0618999	0.19556	0.00207323	0.13366	0.0139152
SID1 transmembrane family member 2	Sidt2	NO	tr|E0CXC7|E0CXC7_MOUSE SID1 transmembrane family member 2 (Fragment) OS=Mus musculus OX=10090 GN=Sidt2 PE=1 SV=1;sp|Q8CIF6|SIDT2_MOUSE SID1 transmembrane family member 2 OS=Mus musculus OX=10090 GN=Sidt2 PE=1 SV=1;tr|F7B6N2|F7B6N2_MOUSE SID1 transmembrane	-0.286227	0.00516463	-0.210613	0.0213698	0.0756145	0.23216	0.0140271	0.307774	0.00355284
Sialate O-acetylesterase;Sialate O-acetylesterase small subunit;Sialate O-acetylesterase large subunit	Siae	NO	tr|A0A1L1SU77|A0A1L1SU77_MOUSE Sialate O-acetylesterase OS=Mus musculus OX=10090 GN=Siae PE=1 SV=1;sp|P70665|SIAE_MOUSE Sialate O-acetylesterase OS=Mus musculus OX=10090 GN=Siae PE=1 SV=3;tr|A0A1N9M4K1|A0A1N9M4K1_MOUSE Sialate O-acetylesterase OS=Mus muscu	-0.302045	0.12628	-0.202872	0.28169	0.0991734	-0.323799	0.105225	-0.224625	0.237643
Protein Shroom4	Shroom4	NO	sp|Q1W617|SHRM4_MOUSE Protein Shroom4 OS=Mus musculus OX=10090 GN=Shroom4 PE=1 SV=1	0.187915	0.00581467	0.141553	0.0213799	-0.0463612	-0.566185	7.68015e-06	-0.612546	4.55388e-06
Sedoheptulokinase	Shpk	NO	sp|Q9D5J6|SHPK_MOUSE Sedoheptulokinase OS=Mus musculus OX=10090 GN=Shpk PE=1 SV=1;tr|D6RJM2|D6RJM2_MOUSE Sedoheptulokinase OS=Mus musculus OX=10090 GN=Shpk PE=1 SV=1	0.0176371	0.810472	-0.125238	0.120716	-0.142876	0.155818	0.0641063	0.0129426	0.860165
Leucine-rich repeat protein SHOC-2	Shoc2	YES	sp|O88520|SHOC2_MOUSE Leucine-rich repeat protein SHOC-2 OS=Mus musculus OX=10090 GN=Shoc2 PE=1 SV=2	0.0468275	0.302231	-0.00718238	0.86914	-0.0540099	0.00802523	0.853984	-0.0459846	0.310347
Serine hydroxymethyltransferase	Shmt2	NO	sp|Q9CZN7|GLYM_MOUSE Serine hydroxymethyltransferase, mitochondrial OS=Mus musculus OX=10090 GN=Shmt2 PE=1 SV=1	-0.0155572	0.664806	0.0196821	0.585176	0.0352393	0.15553	0.00281323	0.19077	0.00090131
Serine hydroxymethyltransferase, cytosolic;Serine hydroxymethyltransferase	Shmt1	YES	sp|P50431|GLYC_MOUSE Serine hydroxymethyltransferase, cytosolic OS=Mus musculus OX=10090 GN=Shmt1 PE=1 SV=3;tr|G3UZ26|G3UZ26_MOUSE Serine hydroxymethyltransferase (Fragment) OS=Mus musculus OX=10090 GN=Shmt1 PE=1 SV=1;tr|G3UYY1|G3UYY1_MOUSE Serine hydroxym	-0.0591725	0.251722	-0.155039	0.013796	-0.0958668	0.169227	0.00921344	0.0733601	0.165488
SH3KBP1-binding protein 1;BTB/POZ domain-containing protein KCTD3	Shkbp1;Kctd3	NO	sp|Q6P7W2|SHKB1_MOUSE SH3KBP1-binding protein 1 OS=Mus musculus OX=10090 GN=Shkbp1 PE=1 SV=1;tr|A0A0A6YX67|A0A0A6YX67_MOUSE BTB/POZ domain-containing protein KCTD3 OS=Mus musculus OX=10090 GN=Kctd3 PE=1 SV=1;sp|Q8BFX3|KCTD3_MOUSE BTB/POZ domain-containing	0.121103	0.382289	-0.213056	0.145296	-0.334159	0.337308	0.0359092	0.00314953	0.981328
SHC-transforming protein 1	Shc1	YES	sp|P98083|SHC1_MOUSE SHC-transforming protein 1 OS=Mus musculus OX=10090 GN=Shc1 PE=1 SV=3;tr|D3Z5U6|D3Z5U6_MOUSE SHC-transforming protein 1 (Fragment) OS=Mus musculus OX=10090 GN=Shc1 PE=1 SV=1;tr|D3Z2I8|D3Z2I8_MOUSE SHC-transforming protein 1 (Fragment)	0.125218	0.0146649	0.106067	0.029371	-0.0191506	0.0444547	0.289312	0.0253041	0.534732
Sharpin	Sharpin	NO	sp|Q91WA6|SHRPN_MOUSE Sharpin OS=Mus musculus OX=10090 GN=Sharpin PE=1 SV=1	-0.246504	0.000554624	0.0601242	0.185502	0.306628	-0.124105	0.0192897	0.182524	0.00302044
SH3 and multiple ankyrin repeat domains protein 3	Shank3	NO	tr|A0A0A0MQD5|A0A0A0MQD5_MOUSE SH3 and multiple ankyrin repeat domains protein 3 OS=Mus musculus OX=10090 GN=Shank3 PE=1 SV=1;sp|Q4ACU6|SHAN3_MOUSE SH3 and multiple ankyrin repeat domains protein 3 OS=Mus musculus OX=10090 GN=Shank3 PE=1 SV=3	-0.00379303	0.901664	0.0264073	0.402222	0.0302003	-0.343726	8.74788e-06	-0.313526	1.60237e-05
E3 ubiquitin-protein ligase SH3RF1	Sh3rf1	YES	tr|A0A1B0GSY0|A0A1B0GSY0_MOUSE E3 ubiquitin-protein ligase SH3RF1 OS=Mus musculus OX=10090 GN=Sh3rf1 PE=1 SV=1;tr|E9QQ33|E9QQ33_MOUSE E3 ubiquitin-protein ligase SH3RF1 OS=Mus musculus OX=10090 GN=Sh3rf1 PE=1 SV=1;sp|Q69ZI1|SH3R1_MOUSE E3 ubiquitin-protein	-0.0568072	0.192012	0.0557207	0.199626	0.112528	-0.15237	0.00622499	-0.0398423	0.344743
SH3 domain-containing kinase-binding protein 1	Sh3kbp1	YES	sp|Q8R550|SH3K1_MOUSE SH3 domain-containing kinase-binding protein 1 OS=Mus musculus OX=10090 GN=Sh3kbp1 PE=1 SV=1;tr|E9Q0C1|E9Q0C1_MOUSE SH3 domain-containing kinase-binding protein 1 OS=Mus musculus OX=10090 GN=Sh3kbp1 PE=1 SV=1	0.0590921	0.404262	0.0761055	0.290705	0.0170134	-0.157541	0.0502089	-0.140528	0.0730532
Endophilin-B2	Sh3glb2	NO	sp|Q8R3V5|SHLB2_MOUSE Endophilin-B2 OS=Mus musculus OX=10090 GN=Sh3glb2 PE=1 SV=2;tr|A2AWI7|A2AWI7_MOUSE Endophilin-B2 OS=Mus musculus OX=10090 GN=Sh3glb2 PE=1 SV=1;tr|A2AWI9|A2AWI9_MOUSE Endophilin-B2 OS=Mus musculus OX=10090 GN=Sh3glb2 PE=1 SV=1	-0.133286	0.0105247	-0.0871938	0.0575729	0.0460925	-0.134437	0.0101107	-0.0883446	0.0550954
Endophilin-B1	Sh3glb1	YES	sp|Q9JK48|SHLB1_MOUSE Endophilin-B1 OS=Mus musculus OX=10090 GN=Sh3glb1 PE=1 SV=1;tr|A0A0G2JEC4|A0A0G2JEC4_MOUSE Endophilin-B1 OS=Mus musculus OX=10090 GN=Sh3glb1 PE=1 SV=1	0.0206245	0.56921	0.0932656	0.0309317	0.072641	-0.0493094	0.196734	0.0233316	0.521041
Endophilin-A2	Sh3gl1	NO	sp|Q62419|SH3G1_MOUSE Endophilin-A2 OS=Mus musculus OX=10090 GN=Sh3gl1 PE=1 SV=1	-0.00628933	0.816338	0.00836761	0.757689	0.0146569	-0.192027	0.000163922	-0.17737	0.000267391
SH3 domain-binding protein 5-like	Sh3bp5l	YES	sp|Q99LH9|3BP5L_MOUSE SH3 domain-binding protein 5-like OS=Mus musculus OX=10090 GN=Sh3bp5l PE=1 SV=1	0.0168781	0.691094	0.0267178	0.53299	0.00983971	0.0114113	0.787509	0.021251	0.618076
SH3 domain-binding protein 2	Sh3bp2	YES	tr|Q5U3L0|Q5U3L0_MOUSE SH3 domain-binding protein 2 OS=Mus musculus OX=10090 GN=Sh3bp2 PE=1 SV=1;tr|Q3UD40|Q3UD40_MOUSE SH3 domain-binding protein 2 OS=Mus musculus OX=10090 GN=Sh3bp2 PE=1 SV=1;tr|E9QJU7|E9QJU7_MOUSE SH3 domain-binding protein 2 OS=Mus mus	0.087152	0.0108007	0.174723	0.000238673	0.0875706	0.0365513	0.190843	0.124122	0.00177066
SH3 domain-binding protein 1	Sh3bp1	YES	sp|P55194|3BP1_MOUSE SH3 domain-binding protein 1 OS=Mus musculus OX=10090 GN=Sh3bp1 PE=1 SV=3	-0.123481	0.0560497	0.0513713	0.372296	0.174852	-0.316517	0.000643946	-0.141665	0.0342851
SH3 domain-binding glutamic acid-rich-like protein 3	Sh3bgrl3	NO	sp|Q91VW3|SH3L3_MOUSE SH3 domain-binding glutamic acid-rich-like protein 3 OS=Mus musculus OX=10090 GN=Sh3bgrl3 PE=1 SV=1	-0.0471203	0.497423	-0.0389443	0.572811	0.00817601	-0.160339	0.0454294	-0.152163	0.0544748
SH3 domain-binding glutamic acid-rich-like protein 2;SH3 domain-binding glutamic acid-rich-like protein	Sh3bgrl2	YES	sp|Q8BG73|SH3L2_MOUSE SH3 domain-binding glutamic acid-rich-like protein 2 OS=Mus musculus OX=10090 GN=Sh3bgrl2 PE=1 SV=1;tr|A0A087WS96|A0A087WS96_MOUSE SH3 domain-binding glutamic acid-rich-like protein OS=Mus musculus OX=10090 GN=Sh3bgrl2 PE=1 SV=1	0.0247475	0.758872	0.0948178	0.261153	0.0700703	-0.254961	0.013546	-0.18489	0.0489033
SH3 domain-binding glutamic acid-rich-like protein	Sh3bgrl	YES	sp|Q9JJU8|SH3L1_MOUSE SH3 domain-binding glutamic acid-rich-like protein OS=Mus musculus OX=10090 GN=Sh3bgrl PE=1 SV=1	0.203374	0.00366134	0.196066	0.00442646	-0.00730857	-0.216665	0.00261656	-0.223973	0.00218594
SH2B adapter protein 3	Sh2b3	YES	tr|D3Z3Y5|D3Z3Y5_MOUSE SH2B adapter protein 3 OS=Mus musculus OX=10090 GN=Sh2b3 PE=1 SV=1;sp|O09039|SH2B3_MOUSE SH2B adapter protein 3 OS=Mus musculus OX=10090 GN=Sh2b3 PE=1 SV=2;tr|A0A0G2JE79|A0A0G2JE79_MOUSE SH2B adapter protein 3 (Fragment) OS=Mus muscu	0.0609644	0.254817	0.0601038	0.260961	-0.000860547	-0.0622013	0.246202	-0.0630619	0.240358
SH2B adapter protein 1	Sh2b1	NO	sp|Q91ZM2|SH2B1_MOUSE SH2B adapter protein 1 OS=Mus musculus OX=10090 GN=Sh2b1 PE=1 SV=2	0.0240296	0.522499	0.0480585	0.220478	0.0240289	-0.0930672	0.0353936	-0.0690383	0.0947661
Sphingosine-1-phosphate phosphatase 1	Sgpp1	NO	sp|Q9JI99|SGPP1_MOUSE Sphingosine-1-phosphate phosphatase 1 OS=Mus musculus OX=10090 GN=Sgpp1 PE=1 SV=1;tr|A0A1W2P6K9|A0A1W2P6K9_MOUSE Sphingosine-1-phosphate phosphatase 1 OS=Mus musculus OX=10090 GN=Sgpp1 PE=1 SV=1	-0.171443	0.00938093	-0.0713705	0.182088	0.100073	0.207597	0.00361154	0.30767	0.000389745
Epsilon-sarcoglycan	Sgce	NO	tr|F6WKE4|F6WKE4_MOUSE Epsilon-sarcoglycan OS=Mus musculus OX=10090 GN=Sgce PE=1 SV=2;tr|D3Z572|D3Z572_MOUSE Epsilon-sarcoglycan OS=Mus musculus OX=10090 GN=Sgce PE=1 SV=1;tr|E9PX46|E9PX46_MOUSE Epsilon-sarcoglycan OS=Mus musculus OX=10090 GN=Sgce PE=1 SV=	0.415461	0.0155213	0.577352	0.00312536	0.161891	-0.682333	0.00124848	-0.520442	0.00534749
Sideroflexin-3	Sfxn3	NO	sp|Q91V61|SFXN3_MOUSE Sideroflexin-3 OS=Mus musculus OX=10090 GN=Sfxn3 PE=1 SV=1;tr|Q3U4F0|Q3U4F0_MOUSE Sideroflexin-3 OS=Mus musculus OX=10090 GN=Sfxn3 PE=1 SV=1	-0.00325607	0.926251	-0.0460646	0.217132	-0.0428086	0.11235	0.0131504	0.0695418	0.0800435
Sideroflexin-2	Sfxn2	YES	sp|Q925N2|SFXN2_MOUSE Sideroflexin-2 OS=Mus musculus OX=10090 GN=Sfxn2 PE=1 SV=1	0.0431979	0.320001	0.0422512	0.329962	-0.000946628	0.0399916	0.354735	0.0390449	0.365533
Sideroflexin-1	Sfxn1	NO	sp|Q99JR1|SFXN1_MOUSE Sideroflexin-1 OS=Mus musculus OX=10090 GN=Sfxn1 PE=1 SV=3	-0.171704	0.000926848	0.0101443	0.753927	0.181848	0.0468758	0.176007	0.228724	0.000165594
Vesicle transport protein SFT2C	Sft2d3	YES	tr|E9QJT3|E9QJT3_MOUSE Vesicle transport protein OS=Mus musculus OX=10090 GN=Sft2d3 PE=1 SV=1;sp|Q9CSV6|SFT2C_MOUSE Vesicle transport protein SFT2C OS=Mus musculus OX=10090 GN=Sft2d3 PE=1 SV=2	-0.066873	0.37478	0.0320842	0.662956	0.0989572	-0.275812	0.00595575	-0.176855	0.0408942
Vesicle transport protein SFT2B	Sft2d2	YES	tr|A0A0A6YX21|A0A0A6YX21_MOUSE Vesicle transport protein OS=Mus musculus OX=10090 GN=Sft2d2 PE=1 SV=1;tr|A0A0A6YY20|A0A0A6YY20_MOUSE Vesicle transport protein OS=Mus musculus OX=10090 GN=Sft2d2 PE=1 SV=1;sp|Q8VD57|SFT2B_MOUSE Vesicle transport protein SFT2	-0.278639	0.000794544	-0.256289	0.00128406	0.0223499	0.431789	5.38843e-05	0.454139	3.89594e-05
14-3-3 protein sigma	Sfn	NO	sp|O70456|1433S_MOUSE 14-3-3 protein sigma OS=Mus musculus OX=10090 GN=Sfn PE=1 SV=2	0.0972626	0.420303	0.156754	0.210359	0.059491	-0.0378937	0.748438	0.0215973	0.854587
Splicing factor 3B subunit 4	Sf3b4	NO	sp|Q8QZY9|SF3B4_MOUSE Splicing factor 3B subunit 4 OS=Mus musculus OX=10090 GN=Sf3b4 PE=1 SV=1	0.146091	0.0120496	0.251204	0.000691879	0.105113	0.106864	0.0432795	0.211977	0.00182158
Splicing factor 3B subunit 3	Sf3b3	NO	sp|Q921M3|SF3B3_MOUSE Splicing factor 3B subunit 3 OS=Mus musculus OX=10090 GN=Sf3b3 PE=1 SV=1	0.142341	0.00605354	0.0643064	0.122028	-0.078035	0.148854	0.00483229	0.070819	0.0940368
	Sf3b2	NO	tr|Q3UJB0|Q3UJB0_MOUSE Splicing factor 3b, subunit 2 OS=Mus musculus OX=10090 GN=Sf3b2 PE=1 SV=1	-0.00947482	0.875047	-0.0221345	0.714499	-0.0126596	0.0844137	0.18987	0.071754	0.256905
Splicing factor 1	Sf1	YES	tr|D3YVH4|D3YVH4_MOUSE Splicing factor 1 (Fragment) OS=Mus musculus OX=10090 GN=Sf1 PE=1 SV=1;tr|E9Q4Q2|E9Q4Q2_MOUSE Splicing factor 1 OS=Mus musculus OX=10090 GN=Sf1 PE=1 SV=1;tr|D3YZC9|D3YZC9_MOUSE Splicing factor 1 OS=Mus musculus OX=10090 GN=Sf1 PE=1 S	0.226728	0.00232233	0.193924	0.00527239	-0.0328043	-0.454727	3.48966e-05	-0.487532	2.2204e-05
Histone-lysine N-methyltransferase SETDB1	Setdb1	YES	tr|G5E8N3|G5E8N3_MOUSE Histone-lysine N-methyltransferase OS=Mus musculus OX=10090 GN=Setdb1 PE=1 SV=1;tr|D3YYC3|D3YYC3_MOUSE Histone-lysine N-methyltransferase OS=Mus musculus OX=10090 GN=Setdb1 PE=1 SV=1;sp|O88974|SETB1_MOUSE Histone-lysine N-methyltrans	0.0317891	0.728843	-0.196944	0.060852	-0.228733	-0.00502371	0.956113	-0.233757	0.0331003
Histone-lysine N-methyltransferase SETD7	Setd7	YES	sp|Q8VHL1|SETD7_MOUSE Histone-lysine N-methyltransferase SETD7 OS=Mus musculus OX=10090 GN=Setd7 PE=1 SV=2	-0.271845	0.124428	-0.0970652	0.552463	0.17478	0.0791417	0.626573	0.253922	0.147006
Histone-lysine N-methyltransferase setd3	Setd3	NO	sp|Q91WC0|SETD3_MOUSE Histone-lysine N-methyltransferase setd3 OS=Mus musculus OX=10090 GN=Setd3 PE=1 SV=1;tr|F2Z420|F2Z420_MOUSE Histone-lysine N-methyltransferase OS=Mus musculus OX=10090 GN=Setd3 PE=1 SV=1	0.0159479	0.669385	0.0408629	0.291395	0.024915	0.0828226	0.0542586	0.107738	0.0199299
Serpin H1	Serpinh1	NO	sp|P19324|SERPH_MOUSE Serpin H1 OS=Mus musculus OX=10090 GN=Serpinh1 PE=1 SV=3	0.0211848	0.50062	-0.0721466	0.0465502	-0.0933314	0.0856465	0.0242409	-0.00768488	0.804096
Plasma protease C1 inhibitor	Serping1	NO	sp|P97290|IC1_MOUSE Plasma protease C1 inhibitor OS=Mus musculus OX=10090 GN=Serping1 PE=1 SV=3;tr|A2ATR8|A2ATR8_MOUSE Plasma protease C1 inhibitor OS=Mus musculus OX=10090 GN=Serping1 PE=1 SV=1	0.0195796	0.890279	0.279986	0.0804634	0.260407	0.0620195	0.664197	0.322426	0.0510463
Alpha-2-antiplasmin	Serpinf2	YES	sp|Q61247|A2AP_MOUSE Alpha-2-antiplasmin OS=Mus musculus OX=10090 GN=Serpinf2 PE=1 SV=1;tr|Q5ND35|Q5ND35_MOUSE Alpha-2-antiplasmin (Fragment) OS=Mus musculus OX=10090 GN=Serpinf2 PE=1 SV=1	0.00731202	0.945895	0.364672	0.01008	0.35736	-0.274223	0.0338752	0.0831376	0.450303
Glia-derived nexin	Serpine2	YES	sp|Q07235|GDN_MOUSE Glia-derived nexin OS=Mus musculus OX=10090 GN=Serpine2 PE=1 SV=2;tr|A0A087WQ70|A0A087WQ70_MOUSE Glia-derived nexin (Fragment) OS=Mus musculus OX=10090 GN=Serpine2 PE=1 SV=1;tr|A0A087WQM1|A0A087WQM1_MOUSE Glia-derived nexin (Fragment) O	-0.0660133	0.0404489	0.253967	2.88408e-05	0.31998	-2.47075	5.34581e-12	-2.15077	1.39252e-11
Heparin cofactor 2	Serpind1	NO	sp|P49182|HEP2_MOUSE Heparin cofactor 2 OS=Mus musculus OX=10090 GN=Serpind1 PE=1 SV=1	-0.0452411	0.69909	0.397816	0.00962403	0.443058	-0.419997	0.00742213	0.0230608	0.843144
Antithrombin-III	Serpinc1	YES	sp|P32261|ANT3_MOUSE Antithrombin-III OS=Mus musculus OX=10090 GN=Serpinc1 PE=1 SV=1;tr|A0A0A6YWH7|A0A0A6YWH7_MOUSE Antithrombin-III (Fragment) OS=Mus musculus OX=10090 GN=Serpinc1 PE=1 SV=1	-0.146146	0.63729	0.128621	0.677598	0.274767	-0.502072	0.134724	-0.227305	0.468596
	Serpinb9	NO	tr|O08797|O08797_MOUSE SPI6 OS=Mus musculus OX=10090 GN=Serpinb9 PE=1 SV=1	0.00675796	0.824414	-0.0374056	0.24332	-0.0441635	0.0473123	0.151258	0.00314877	0.917542
Serpin B8	Serpinb8	NO	sp|O08800|SPB8_MOUSE Serpin B8 OS=Mus musculus OX=10090 GN=Serpinb8 PE=1 SV=2	0.122337	0.154063	0.148619	0.0934698	0.0262822	0.0368557	0.644561	0.0631379	0.436357
	Serpinb6b	NO	tr|O08804|O08804_MOUSE NK13 OS=Mus musculus OX=10090 GN=Serpinb6b PE=1 SV=2;tr|F7B9A0|F7B9A0_MOUSE Serine (or cysteine) peptidase inhibitor, clade B, member 6b OS=Mus musculus OX=10090 GN=Serpinb6b PE=1 SV=1;tr|A0A1Y7VLD5|A0A1Y7VLD5_MOUSE Serine (or cystei	0.263878	0.000344939	0.111012	0.0290737	-0.152866	0.0919091	0.0577237	-0.0609574	0.175986
	Serpinb6a	NO	tr|F8WIV2|F8WIV2_MOUSE Serine (or cysteine) peptidase inhibitor, clade B, member 6a OS=Mus musculus OX=10090 GN=Serpinb6a PE=1 SV=1	-0.109321	0.327702	0.381506	0.00809435	0.490827	-0.101422	0.361499	0.389405	0.00732962
Serpin B6	Serpinb6;Serpinb6a	NO	sp|Q60854|SPB6_MOUSE Serpin B6 OS=Mus musculus OX=10090 GN=Serpinb6 PE=1 SV=1;tr|K7E6F1|K7E6F1_MOUSE Serine (or cysteine) peptidase inhibitor, clade B, member 6a (Fragment) OS=Mus musculus OX=10090 GN=Serpinb6a PE=1 SV=1	0.224833	0.000447056	0.132539	0.00799678	-0.0922939	-0.105391	0.022359	-0.197685	0.000952232
Plasminogen activator inhibitor 2, macrophage	Serpinb2	NO	sp|P12388|PAI2_MOUSE Plasminogen activator inhibitor 2, macrophage OS=Mus musculus OX=10090 GN=Serpinb2 PE=1 SV=1	0.303463	7.00372e-05	0.183875	0.00144094	-0.119588	-0.0650255	0.114271	-0.184613	0.00140884
Leukocyte elastase inhibitor A	Serpinb1a	YES	sp|Q9D154|ILEUA_MOUSE Leukocyte elastase inhibitor A OS=Mus musculus OX=10090 GN=Serpinb1a PE=1 SV=1	0.162896	0.00177752	0.214386	0.000360998	0.0514893	-0.0644755	0.0930131	-0.0129862	0.706646
Corticosteroid-binding globulin	Serpina6	NO	sp|Q06770|CBG_MOUSE Corticosteroid-binding globulin OS=Mus musculus OX=10090 GN=Serpina6 PE=1 SV=1	-0.418502	0.014278	0.202401	0.16033	0.620903	-0.118099	0.389687	0.502804	0.00599864
Serine protease inhibitor A3N	Serpina3n	NO	tr|G3X8T9|G3X8T9_MOUSE Serine (Or cysteine) peptidase inhibitor, clade A, member 3N, isoform CRA_a OS=Mus musculus OX=10090 GN=Serpina3n PE=1 SV=1;sp|Q91WP6|SPA3N_MOUSE Serine protease inhibitor A3N OS=Mus musculus OX=10090 GN=Serpina3n PE=1 SV=1	0.0722423	0.369422	0.181966	0.0466711	0.109724	-0.746374	2.46414e-05	-0.636651	6.86039e-05
Serine protease inhibitor A3M	Serpina3m	NO	sp|Q03734|SPA3M_MOUSE Serine protease inhibitor A3M OS=Mus musculus OX=10090 GN=Serpina3m PE=1 SV=2	-0.0739473	0.503395	0.150456	0.194668	0.224403	-0.555898	0.00116431	-0.331495	0.0161153
Serine protease inhibitor A3K	Serpina3k	NO	tr|A0A0R4J0I1|A0A0R4J0I1_MOUSE MCG1051009 OS=Mus musculus OX=10090 GN=Serpina3k PE=1 SV=1;sp|P07759|SPA3K_MOUSE Serine protease inhibitor A3K OS=Mus musculus OX=10090 GN=Serpina3k PE=1 SV=2	0.450181	0.0222695	0.33426	0.0663896	-0.11592	0.192799	0.249928	0.0768782	0.632054
Serine protease inhibitor A3B	Serpina3b	NO	sp|Q8BYY9|SPA3B_MOUSE Serine protease inhibitor A3B OS=Mus musculus OX=10090 GN=Serpina3b PE=2 SV=1	0.105234	0.112964	0.437127	0.000141983	0.331893	-1.87302	8.52733e-09	-1.54113	3.24937e-08
Alpha-1-antitrypsin 1-5	Serpina1e	NO	sp|Q00898|A1AT5_MOUSE Alpha-1-antitrypsin 1-5 OS=Mus musculus OX=10090 GN=Serpina1e PE=1 SV=1	0.920143	4.88841e-05	0.183965	0.118236	-0.736177	0.477233	0.00249058	-0.258944	0.0407962
Alpha-1-antitrypsin 1-4	Serpina1d	NO	sp|Q00897|A1AT4_MOUSE Alpha-1-antitrypsin 1-4 OS=Mus musculus OX=10090 GN=Serpina1d PE=1 SV=1	0.0494049	0.657763	0.287538	0.0313274	0.238133	-0.147899	0.209037	0.0902344	0.426306
Alpha-1-antitrypsin 1-3	Serpina1c	NO	tr|A0A0R4J0X5|A0A0R4J0X5_MOUSE Alpha-1-antitrypsin 1-3 OS=Mus musculus OX=10090 GN=Serpina1c PE=1 SV=1;sp|Q00896|A1AT3_MOUSE Alpha-1-antitrypsin 1-3 OS=Mus musculus OX=10090 GN=Serpina1c PE=1 SV=2	0.203414	0.195258	0.374942	0.0336728	0.171527	-0.0958589	0.521171	0.0756683	0.610469
Alpha-1-antitrypsin 1-2	Serpina1b	NO	sp|P22599|A1AT2_MOUSE Alpha-1-antitrypsin 1-2 OS=Mus musculus OX=10090 GN=Serpina1b PE=1 SV=2	0.177597	0.248521	0.242101	0.130099	0.0645038	-0.102952	0.489121	-0.0384479	0.792979
Alpha-1-antitrypsin 1-1	Serpina1a	NO	tr|A0A0A0MQA3|A0A0A0MQA3_MOUSE Alpha-1-antitrypsin 1-1 OS=Mus musculus OX=10090 GN=Serpina1a PE=1 SV=1;sp|P07758|A1AT1_MOUSE Alpha-1-antitrypsin 1-1 OS=Mus musculus OX=10090 GN=Serpina1a PE=1 SV=4	0.155128	0.482323	0.371399	0.119311	0.216272	-0.680069	0.014228	-0.463797	0.0624159
Protein Z-dependent protease inhibitor	Serpina10	NO	sp|Q8R121|ZPI_MOUSE Protein Z-dependent protease inhibitor OS=Mus musculus OX=10090 GN=Serpina10 PE=1 SV=1	-0.030313	0.789348	0.120416	0.30686	0.150729	-0.0833945	0.470117	0.0673344	0.557065
Serine incorporator 3	Serinc3	YES	sp|Q9QZI9|SERC3_MOUSE Serine incorporator 3 OS=Mus musculus OX=10090 GN=Serinc3 PE=1 SV=2	0.355038	0.000627409	0.119485	0.0878486	-0.235553	0.0337438	0.592461	-0.201809	0.0123962
Serine incorporator 1	Serinc1	NO	sp|Q9QZI8|SERC1_MOUSE Serine incorporator 1 OS=Mus musculus OX=10090 GN=Serinc1 PE=1 SV=1;tr|E9PY81|E9PY81_MOUSE Serine incorporator 1 (Fragment) OS=Mus musculus OX=10090 GN=Serinc1 PE=1 SV=1	-0.033717	0.333803	-0.0622767	0.097018	-0.0285597	0.147474	0.00274405	0.118915	0.00821159
Serine hydrolase-like protein	Serhl	NO	tr|Q3U3G8|Q3U3G8_MOUSE Serine hydrolase-like protein OS=Mus musculus OX=10090 GN=Serhl PE=1 SV=1;sp|Q9EPB5|SERHL_MOUSE Serine hydrolase-like protein OS=Mus musculus OX=10090 GN=Serhl PE=1 SV=1	0.00789917	0.827971	-0.0563751	0.15184	-0.0642742	0.238719	0.000263603	0.174445	0.00165619
Secretion-regulating guanine nucleotide exchange factor	Sergef	NO	tr|A0A1L1SUM5|A0A1L1SUM5_MOUSE Secretion-regulating guanine nucleotide exchange factor OS=Mus musculus OX=10090 GN=Sergef PE=1 SV=1;sp|Q80YD6|SRGEF_MOUSE Secretion-regulating guanine nucleotide exchange factor OS=Mus musculus OX=10090 GN=Sergef PE=2 SV=2	0.0574242	0.296907	0.0130003	0.80585	-0.044424	-0.159932	0.0166164	-0.204356	0.00523396
Plasminogen activator inhibitor 1 RNA-binding protein	Serbp1	YES	tr|Q3UMP4|Q3UMP4_MOUSE Plasminogen activator inhibitor 1 RNA-binding protein OS=Mus musculus OX=10090 GN=Serbp1 PE=1 SV=1;sp|Q9CY58|PAIRB_MOUSE Plasminogen activator inhibitor 1 RNA-binding protein OS=Mus musculus OX=10090 GN=Serbp1 PE=1 SV=2;tr|A0A0N4SV32	0.0562661	0.307538	0.0629512	0.258069	0.00668507	-0.67814	3.5981e-06	-0.671455	3.84406e-06
Septin-9	Sept9	NO	tr|A2A6U3|A2A6U3_MOUSE Septin-9 OS=Mus musculus OX=10090 GN=Sept9 PE=1 SV=1;sp|Q80UG5|SEPT9_MOUSE Septin-9 OS=Mus musculus OX=10090 GN=Sept9 PE=1 SV=1	0.074947	0.0391422	0.133167	0.00285301	0.0582201	-0.0733051	0.0424371	-0.0150849	0.625237
Septin-8	Sept8	NO	tr|B1AQY9|B1AQY9_MOUSE Septin-8 OS=Mus musculus OX=10090 GN=Sept8 PE=1 SV=1;tr|B1AQZ0|B1AQZ0_MOUSE Septin-8 OS=Mus musculus OX=10090 GN=Sept8 PE=1 SV=1;sp|Q8CHH9|SEPT8_MOUSE Septin-8 OS=Mus musculus OX=10090 GN=Sept8 PE=1 SV=4;tr|B7ZC46|B7ZC46_MOUSE Septin	-0.0749632	0.0245072	-0.0974856	0.00757709	-0.0225224	0.0630212	0.0473243	0.0404989	0.166147
	Sept7	NO	tr|E9Q1G8|E9Q1G8_MOUSE Septin-7 OS=Mus musculus OX=10090 GN=Sept7 PE=1 SV=2;tr|E9Q9F5|E9Q9F5_MOUSE Septin-7 OS=Mus musculus OX=10090 GN=Sept7 PE=1 SV=2	0.011468	0.770507	0.0190379	0.630136	0.00756988	-0.0184761	0.640095	-0.0109063	0.781389
Septin-7	Sept7	NO	sp|O55131|SEPT7_MOUSE Septin-7 OS=Mus musculus OX=10090 GN=Sept7 PE=1 SV=1	0.21877	0.0674913	0.506581	0.00159795	0.28781	0.0259369	0.804787	0.313747	0.017448
Septin-6	Sept6	NO	sp|Q9R1T4|SEPT6_MOUSE Septin-6 OS=Mus musculus OX=10090 GN=Sept6 PE=1 SV=4	0.070907	0.209067	0.056043	0.310287	-0.014864	-0.0316937	0.555675	-0.0465577	0.393696
Septin-5	Sept5	NO	sp|Q9Z2Q6|SEPT5_MOUSE Septin-5 OS=Mus musculus OX=10090 GN=Sept5 PE=1 SV=2	-0.0864517	0.0205832	-0.0953231	0.0134579	-0.00887136	0.0254082	0.409261	0.0165368	0.585655
Neuronal-specific septin-3	Sept3	NO	tr|A0A2R8VHR7|A0A2R8VHR7_MOUSE Neuronal-specific septin-3 (Fragment) OS=Mus musculus OX=10090 GN=Sept3 PE=1 SV=1;tr|A0A2R8W6V9|A0A2R8W6V9_MOUSE Neuronal-specific septin-3 OS=Mus musculus OX=10090 GN=Sept3 PE=1 SV=1;sp|Q9Z1S5|SEPT3_MOUSE Neuronal-specific s	0.315582	0.235296	0.133222	0.60043	-0.18236	0.136835	0.590798	-0.0455249	0.856632
	Sept2	NO	tr|E9Q3V6|E9Q3V6_MOUSE Septin-2 OS=Mus musculus OX=10090 GN=Sept2 PE=1 SV=1	-0.64256	0.00678074	-0.245276	0.189569	0.397284	0.276696	0.145305	0.67398	0.00534606
Septin-2	Sept2	NO	sp|P42208|SEPT2_MOUSE Septin-2 OS=Mus musculus OX=10090 GN=Sept2 PE=1 SV=2;tr|F6WYM0|F6WYM0_MOUSE Septin-2 (Fragment) OS=Mus musculus OX=10090 GN=Sept2 PE=1 SV=2;tr|D3YYB1|D3YYB1_MOUSE Septin-2 (Fragment) OS=Mus musculus OX=10090 GN=Sept2 PE=1 SV=1;tr|D3Z3	0.0748309	0.0368572	0.0337989	0.28245	-0.0410321	0.0990628	0.0114217	0.0580307	0.0860081
Septin-11	Sept11	NO	tr|A0A0J9YTY0|A0A0J9YTY0_MOUSE Septin-11 OS=Mus musculus OX=10090 GN=Sept11 PE=1 SV=1;tr|A0A0J9YUL3|A0A0J9YUL3_MOUSE Septin 11, isoform CRA_b OS=Mus musculus OX=10090 GN=Sept11 PE=1 SV=1;sp|Q8C1B7|SEP11_MOUSE Septin-11 OS=Mus musculus OX=10090 GN=Sept11 PE	0.170697	0.00359264	0.10581	0.032052	-0.0648865	-0.00921877	0.822316	-0.0741053	0.103461
Septin-1	Sept1	NO	tr|A0A0U1RQA1|A0A0U1RQA1_MOUSE Septin-1 (Fragment) OS=Mus musculus OX=10090 GN=Sept1 PE=1 SV=2;tr|D3Z3V3|D3Z3V3_MOUSE Septin-1 OS=Mus musculus OX=10090 GN=Sept1 PE=1 SV=1;sp|P42209|SEPT1_MOUSE Septin-1 OS=Mus musculus OX=10090 GN=Sept1 PE=1 SV=2;tr|A0A0U1R	0.172791	0.00200631	-0.0469125	0.23301	-0.219704	0.0504378	0.203273	-0.169266	0.00224575
O-phosphoseryl-tRNA(Sec) selenium transferase	Sepsecs	YES	sp|Q6P6M7|SPCS_MOUSE O-phosphoseryl-tRNA(Sec) selenium transferase OS=Mus musculus OX=10090 GN=Sepsecs PE=1 SV=2	-0.102342	0.0285665	0.137345	0.00782988	0.239687	0.00665048	0.862927	0.246338	0.000311166
Selenoprotein P	Sepp1	NO	sp|P70274|SEPP1_MOUSE Selenoprotein P OS=Mus musculus OX=10090 GN=Selenop PE=1 SV=3	-0.228772	0.0247267	0.133853	0.138882	0.362625	-1.42274	5.03974e-07	-1.06011	3.65139e-06
Selenide, water dikinase 2	Sephs2	NO	sp|P97364|SPS2_MOUSE Selenide, water dikinase 2 OS=Mus musculus OX=10090 GN=Sephs2 PE=1 SV=3	-0.00554159	0.90603	0.0117275	0.803083	0.0172691	0.00555731	0.905765	0.0228264	0.62968
Selenide, water dikinase 1	Sephs1	YES	sp|Q8BH69|SPS1_MOUSE Selenide, water dikinase 1 OS=Mus musculus OX=10090 GN=Sephs1 PE=1 SV=1	0.0247383	0.481076	-0.000472071	0.989065	-0.0252104	0.00126753	0.970646	-0.0239429	0.494783
15 kDa selenoprotein	Sep15	NO	tr|A0A0R4J0K1|A0A0R4J0K1_MOUSE Selenoprotein F OS=Mus musculus OX=10090 GN=Selenof PE=1 SV=1;sp|Q9ERR7|SEP15_MOUSE Selenoprotein F OS=Mus musculus OX=10090 GN=Selenof PE=1 SV=3	-0.0274755	0.648127	0.0542371	0.378209	0.0817126	-0.0281712	0.639976	0.0535414	0.384009
Sentrin-specific protease 8	Senp8	YES	tr|A0A0R4J234|A0A0R4J234_MOUSE SUMO/sentrin specific peptidase 8, isoform CRA_a OS=Mus musculus OX=10090 GN=Senp8 PE=1 SV=2;tr|A0A1L1SRH8|A0A1L1SRH8_MOUSE Sentrin-specific protease 8 OS=Mus musculus OX=10090 GN=Senp8 PE=1 SV=1;sp|Q9D2Z4|SENP8_MOUSE Sentrin	-0.142504	0.00979635	0.0236305	0.576834	0.166135	-0.146793	0.00851102	0.0193414	0.646579
Semaphorin-6D	Sema6d	YES	tr|A2AW73|A2AW73_MOUSE Semaphorin-6D OS=Mus musculus OX=10090 GN=Sema6d PE=1 SV=1;sp|Q76KF0|SEM6D_MOUSE Semaphorin-6D OS=Mus musculus OX=10090 GN=Sema6d PE=1 SV=1	0.383852	0.000520987	0.345681	0.000961715	-0.0381708	-0.47651	0.000139246	-0.514681	8.57622e-05
Semaphorin-4D	Sema4d	YES	sp|O09126|SEM4D_MOUSE Semaphorin-4D OS=Mus musculus OX=10090 GN=Sema4d PE=1 SV=2	0.271443	7.09336e-05	0.184668	0.000750608	-0.0867749	0.0150562	0.654987	-0.0717188	0.062041
Semaphorin-4B	Sema4b	YES	sp|Q62179|SEM4B_MOUSE Semaphorin-4B OS=Mus musculus OX=10090 GN=Sema4b PE=1 SV=2	0.10174	0.0255712	0.0603523	0.137053	-0.0413876	-0.506251	2.39711e-06	-0.547638	1.41396e-06
Selenoprotein T	Selt	NO	sp|P62342|SELT_MOUSE Thioredoxin reductase-like selenoprotein T OS=Mus musculus OX=10090 GN=Selenot PE=1 SV=2	0.0434256	0.422029	-0.0592786	0.282678	-0.102704	0.291485	0.000748616	0.188781	0.00773561
P-selectin	Selp	NO	sp|Q01102|LYAM3_MOUSE P-selectin OS=Mus musculus OX=10090 GN=Selp PE=1 SV=1	0.0244317	0.343324	0.0344855	0.194731	0.0100538	0.0720298	0.0202819	0.0820836	0.0113988
Selenoprotein O	Selo	NO	sp|Q9DBC0|SELO_MOUSE Selenoprotein O OS=Mus musculus OX=10090 GN=Selenoo PE=1 SV=4	-0.116109	0.0179244	-0.0701614	0.1049	0.045948	0.0047913	0.902249	0.0507393	0.219815
Selenoprotein M	Selm	NO	sp|Q8VHC3|SELM_MOUSE Selenoprotein M OS=Mus musculus OX=10090 GN=Selenom PE=1 SV=3	-0.104471	0.0576345	-0.0591734	0.239213	0.0452972	0.0306852	0.525873	0.0759824	0.142703
Selenoprotein K	Selk	NO	sp|Q9JLJ1|SELK_MOUSE Selenoprotein K OS=Mus musculus OX=10090 GN=Selenok PE=1 SV=3	-0.0152869	0.656073	-0.0684764	0.0761678	-0.0531895	0.554596	7.16557e-07	0.501406	1.41486e-06
Selenium-binding protein 1;Selenium-binding protein 2	Selenbp1;Selenbp2	NO	sp|P17563|SBP1_MOUSE Methanethiol oxidase OS=Mus musculus OX=10090 GN=Selenbp1 PE=1 SV=2;tr|A0A0R4J135|A0A0R4J135_MOUSE Selenium-binding protein 2 OS=Mus musculus OX=10090 GN=Selenbp2 PE=1 SV=1;sp|Q63836|SBP2_MOUSE Selenium-binding protein 2 OS=Mus musculu	0.0593854	0.0601042	-0.0339584	0.240544	-0.0933438	0.0549104	0.0770518	-0.0384334	0.190051
Protein sel-1 homolog 1	Sel1l	YES	tr|J3QJX3|J3QJX3_MOUSE Protein sel-1 homolog 1 OS=Mus musculus OX=10090 GN=Sel1l PE=1 SV=1;sp|Q9Z2G6|SE1L1_MOUSE Protein sel-1 homolog 1 OS=Mus musculus OX=10090 GN=Sel1l PE=1 SV=2	-0.204049	0.000537068	-0.219559	0.000346236	-0.0155102	0.239901	0.000201463	0.224391	0.000303418
Nucleoporin SEH1	Seh1l	YES	sp|Q8R2U0|SEH1_MOUSE Nucleoporin SEH1 OS=Mus musculus OX=10090 GN=Seh1l PE=2 SV=1	-0.00507195	0.892062	-0.10881	0.0196923	-0.103738	0.0794162	0.0638335	-0.0243215	0.521576
Translocation protein SEC63 homolog	Sec63	YES	sp|Q8VHE0|SEC63_MOUSE Translocation protein SEC63 homolog OS=Mus musculus OX=10090 GN=Sec63 PE=1 SV=4	-0.035364	0.334385	0.0199276	0.577331	0.0552916	0.109988	0.0147725	0.165279	0.00192734
Translocation protein SEC62	Sec62	YES	sp|Q8BU14|SEC62_MOUSE Translocation protein SEC62 OS=Mus musculus OX=10090 GN=Sec62 PE=1 SV=1	-0.0993563	0.0512948	-0.126963	0.0200459	-0.0276062	0.145373	0.0110092	0.117767	0.0272866
Protein transport protein Sec61 subunit gamma	Sec61g	NO	sp|P60060|SC61G_MOUSE Protein transport protein Sec61 subunit gamma OS=Mus musculus OX=10090 GN=Sec61g PE=3 SV=1;tr|G3UWH0|G3UWH0_MOUSE MCG7641, isoform CRA_b OS=Mus musculus OX=10090 GN=Sec61g PE=1 SV=1	-0.0468494	0.715124	-0.130963	0.323448	-0.0841133	-0.0104037	0.935087	-0.094517	0.468309
Protein transport protein Sec61 subunit beta	Sec61b;Gm10320	NO	sp|Q9CQS8|SC61B_MOUSE Protein transport protein Sec61 subunit beta OS=Mus musculus OX=10090 GN=Sec61b PE=1 SV=3;tr|E9PW43|E9PW43_MOUSE Protein transport protein Sec61 subunit beta OS=Mus musculus OX=10090 GN=Gm10320 PE=3 SV=1	0.189789	0.00553418	-0.0290678	0.562555	-0.218856	0.440954	3.94052e-05	0.222098	0.00243452
Protein transport protein Sec61 subunit alpha isoform 2	Sec61a2	NO	sp|Q9JLR1|S61A2_MOUSE Protein transport protein Sec61 subunit alpha isoform 2 OS=Mus musculus OX=10090 GN=Sec61a2 PE=2 SV=3;tr|Q9CYJ6|Q9CYJ6_MOUSE Protein transport protein Sec61 subunit alpha isoform 2 OS=Mus musculus OX=10090 GN=Sec61a2 PE=1 SV=1	-0.195965	0.175274	-0.10683	0.437809	0.0891352	0.286692	0.0633438	0.375827	0.0234393
Protein transport protein Sec61 subunit alpha isoform 1	Sec61a1	YES	sp|P61620|S61A1_MOUSE Protein transport protein Sec61 subunit alpha isoform 1 OS=Mus musculus OX=10090 GN=Sec61a1 PE=1 SV=2	0.0691439	0.441145	-0.00534051	0.951466	-0.0744844	0.274483	0.0144441	0.199999	0.0505578
Protein transport protein Sec31A	Sec31a	NO	sp|Q3UPL0|SC31A_MOUSE Protein transport protein Sec31A OS=Mus musculus OX=10090 GN=Sec31a PE=1 SV=2;tr|S4R2A9|S4R2A9_MOUSE Protein transport protein Sec31A (Fragment) OS=Mus musculus OX=10090 GN=Sec31a PE=1 SV=1	0.052514	0.130654	0.0371818	0.264545	-0.0153322	-0.0361795	0.276489	-0.0515117	0.136992
	Sec24d	NO	tr|Q6NXL1|Q6NXL1_MOUSE Sec24-related gene family, member D (S. cerevisiae) OS=Mus musculus OX=10090 GN=Sec24d PE=1 SV=1	0.240789	0.00673936	0.0343363	0.603414	-0.206452	0.218334	0.0107626	0.0118821	0.856037
	Sec24c	NO	tr|G3X972|G3X972_MOUSE SEC24 related gene family, member C (S. cerevisiae), isoform CRA_a OS=Mus musculus OX=10090 GN=Sec24c PE=1 SV=1;tr|A0A286YDI8|A0A286YDI8_MOUSE Sec24-related gene family, member C (S. cerevisiae) OS=Mus musculus OX=10090 GN=Sec24c PE=	0.0300324	0.320081	0.0383998	0.213663	0.00836737	0.0615868	0.0645547	0.0699542	0.0417256
	Sec24b	NO	tr|Q80ZX0|Q80ZX0_MOUSE Sec24-related gene family, member B (S. cerevisiae) OS=Mus musculus OX=10090 GN=Sec24b PE=1 SV=1;tr|F6VJC5|F6VJC5_MOUSE Sec24-related gene family, member B (S. cerevisiae) (Fragment) OS=Mus musculus OX=10090 GN=Sec24b PE=1 SV=1	0.0146142	0.63811	0.0794093	0.03229	0.0647951	-0.031651	0.322638	0.0331441	0.301996
Protein transport protein Sec24A	Sec24a	YES	sp|Q3U2P1|SC24A_MOUSE Protein transport protein Sec24A OS=Mus musculus OX=10090 GN=Sec24a PE=1 SV=1	0.0695277	0.0442309	-0.0154025	0.603637	-0.0849302	0.1638	0.000707681	0.0788695	0.0274727
	Sec24a	YES	tr|A2AA71|A2AA71_MOUSE Protein transport protein Sec24A OS=Mus musculus OX=10090 GN=Sec24a PE=1 SV=1	-0.278946	0.0967541	-0.0274415	0.855547	0.251504	-0.0529965	0.726064	0.198508	0.214446
SEC23-interacting protein	Sec23ip	NO	tr|G3X928|G3X928_MOUSE SEC23-interacting protein OS=Mus musculus OX=10090 GN=Sec23ip PE=1 SV=1;sp|Q6NZC7|S23IP_MOUSE SEC23-interacting protein OS=Mus musculus OX=10090 GN=Sec23ip PE=1 SV=2	0.0937851	0.177011	0.12326	0.0892706	0.0294744	-0.0750977	0.268286	-0.0456233	0.488632
Protein transport protein Sec23B	Sec23b	NO	sp|Q9D662|SC23B_MOUSE Protein transport protein Sec23B OS=Mus musculus OX=10090 GN=Sec23b PE=1 SV=1	-0.0230985	0.4037	-0.0502226	0.0949468	-0.0271241	0.129787	0.00163204	0.102663	0.00565895
Protein transport protein Sec23A	Sec23a	NO	tr|E9Q1S3|E9Q1S3_MOUSE Protein transport protein Sec23A OS=Mus musculus OX=10090 GN=Sec23a PE=1 SV=1;sp|Q01405|SC23A_MOUSE Protein transport protein Sec23A OS=Mus musculus OX=10090 GN=Sec23a PE=1 SV=2	0.0647762	0.0466003	0.0581233	0.0670544	-0.00665287	0.0942677	0.00992983	0.0876148	0.0138895
Vesicle-trafficking protein SEC22b	Sec22b	YES	sp|O08547|SC22B_MOUSE Vesicle-trafficking protein SEC22b OS=Mus musculus OX=10090 GN=Sec22b PE=1 SV=3;tr|E9Q6R3|E9Q6R3_MOUSE Vesicle-trafficking protein SEC22b OS=Mus musculus OX=10090 GN=Sec22b PE=1 SV=1	0.123398	0.00634074	0.0508359	0.156039	-0.0725625	0.0501389	0.160994	-0.0224236	0.505571
Vesicle-trafficking protein SEC22a	Sec22a	NO	sp|Q8BH47|SC22A_MOUSE Vesicle-trafficking protein SEC22a OS=Mus musculus OX=10090 GN=Sec22a PE=2 SV=1	0.0224201	0.68294	-0.00178425	0.973903	-0.0242043	0.381109	0.000181902	0.356904	0.00027233
	Sec16a	NO	tr|E9QAT4|E9QAT4_MOUSE Protein transport protein sec16 OS=Mus musculus OX=10090 GN=Sec16a PE=1 SV=1;tr|A2AIX1|A2AIX1_MOUSE Protein transport protein sec16 OS=Mus musculus OX=10090 GN=Sec16a PE=1 SV=1;tr|F7BPW6|F7BPW6_MOUSE Protein transport protein sec16 (	-0.0461608	0.144049	-0.0158414	0.589727	0.0303194	-0.309813	1.21087e-05	-0.279493	2.37615e-05
	Sec14l5	NO	tr|B2RXM5|B2RXM5_MOUSE SEC14-like 5 (S. cerevisiae) OS=Mus musculus OX=10090 GN=Sec14l5 PE=1 SV=1	-0.119603	0.00840021	-0.0831178	0.0394028	0.0364854	0.0536157	0.146654	0.0901012	0.0289834
SEC14-like protein 2	Sec14l2	NO	sp|Q99J08|S14L2_MOUSE SEC14-like protein 2 OS=Mus musculus OX=10090 GN=Sec14l2 PE=1 SV=1	0.137367	0.00237278	0.0268547	0.392143	-0.110512	0.0871551	0.021366	-0.023357	0.4537
Protein SEC13 homolog	Sec13	NO	sp|Q9D1M0|SEC13_MOUSE Protein SEC13 homolog OS=Mus musculus OX=10090 GN=Sec13 PE=1 SV=3	0.0515687	0.380721	0.0397064	0.494656	-0.0118623	0.0299617	0.603577	0.0180994	0.752199
Signal peptidase complex catalytic subunit SEC11C	Sec11c	NO	sp|Q9D8V7|SC11C_MOUSE Signal peptidase complex catalytic subunit SEC11C OS=Mus musculus OX=10090 GN=Sec11c PE=1 SV=3	-0.0758848	0.0349831	-0.04341	0.17865	0.0324748	0.21943	0.000138798	0.251905	5.79987e-05
Signal peptidase complex catalytic subunit SEC11;Signal peptidase complex catalytic subunit SEC11A	Sec11a	NO	tr|D3YWT0|D3YWT0_MOUSE Signal peptidase complex catalytic subunit SEC11 OS=Mus musculus OX=10090 GN=Sec11a PE=1 SV=1;tr|D3Z569|D3Z569_MOUSE Signal peptidase complex catalytic subunit SEC11 OS=Mus musculus OX=10090 GN=Sec11a PE=1 SV=1;tr|D3YTS1|D3YTS1_MOUSE	0.145914	0.00094005	0.138201	0.00128206	-0.00771263	0.207818	0.000110686	0.200105	0.000140285
Serine dehydratase-like	Sdsl	NO	sp|Q8R238|SDSL_MOUSE Serine dehydratase-like OS=Mus musculus OX=10090 GN=Sdsl PE=1 SV=1;tr|D3Z0F6|D3Z0F6_MOUSE Serine dehydratase-like (Fragment) OS=Mus musculus OX=10090 GN=Sdsl PE=1 SV=1	0.0405146	0.423358	-0.0423559	0.403632	-0.0828706	0.0364881	0.468872	-0.0463824	0.36288
Epimerase family protein SDR39U1	Sdr39u1	NO	tr|A0A2I3BQS7|A0A2I3BQS7_MOUSE Epimerase family protein SDR39U1 (Fragment) OS=Mus musculus OX=10090 GN=Sdr39u1 PE=1 SV=1;sp|Q5M8N4|D39U1_MOUSE Epimerase family protein SDR39U1 OS=Mus musculus OX=10090 GN=Sdr39u1 PE=1 SV=1;tr|A0A2I3BPM4|A0A2I3BPM4_MOUSE Epi	-0.0779209	0.137391	-0.00233128	0.961332	0.0755896	-0.273573	0.000630413	-0.197983	0.00381937
Serum deprivation-response protein	Sdpr	YES	sp|Q63918|CAVN2_MOUSE Caveolae-associated protein 2 OS=Mus musculus OX=10090 GN=Cavin2 PE=1 SV=3	0.0248382	0.40533	0.0450224	0.152823	0.0201842	-0.315631	1.0733e-05	-0.295447	1.65689e-05
Succinate dehydrogenase [ubiquinone] cytochrome b small subunit, mitochondrial	Sdhd	NO	sp|Q9CXV1|DHSD_MOUSE Succinate dehydrogenase [ubiquinone] cytochrome b small subunit, mitochondrial OS=Mus musculus OX=10090 GN=Sdhd PE=1 SV=2	-0.190717	0.0643947	0.114639	0.228447	0.305355	-0.128098	0.183871	0.177258	0.0808693
Succinate dehydrogenase cytochrome b560 subunit, mitochondrial	Sdhc	NO	sp|Q9CZB0|C560_MOUSE Succinate dehydrogenase cytochrome b560 subunit, mitochondrial OS=Mus musculus OX=10090 GN=Sdhc PE=1 SV=1;tr|F8WGB3|F8WGB3_MOUSE Succinate dehydrogenase cytochrome b560 subunit, mitochondrial OS=Mus musculus OX=10090 GN=Sdhc PE=1 SV=1	-0.0806804	0.343618	0.00264898	0.974317	0.0833294	0.190592	0.0478197	0.273922	0.0108923
Succinate dehydrogenase [ubiquinone] iron-sulfur subunit, mitochondrial	Sdhb	NO	sp|Q9CQA3|SDHB_MOUSE Succinate dehydrogenase [ubiquinone] iron-sulfur subunit, mitochondrial OS=Mus musculus OX=10090 GN=Sdhb PE=1 SV=1	-0.0729291	0.0182089	-0.0527937	0.0617549	0.0201354	0.191523	9.19751e-05	0.211659	4.86517e-05
Succinate dehydrogenase assembly factor 4, mitochondrial	Sdhaf4	NO	sp|Q8BTE0|SDHF4_MOUSE Succinate dehydrogenase assembly factor 4, mitochondrial OS=Mus musculus OX=10090 GN=Sdhaf4 PE=3 SV=2	-0.0269455	0.639424	-0.0327963	0.570059	-0.00585075	-0.127515	0.054028	-0.133366	0.0462495
Succinate dehydrogenase assembly factor 2, mitochondrial	Sdhaf2	NO	sp|Q8C6I2|SDHF2_MOUSE Succinate dehydrogenase assembly factor 2, mitochondrial OS=Mus musculus OX=10090 GN=Sdhaf2 PE=1 SV=1	-0.0958489	0.774097	0.221454	0.512891	0.317303	1.37596	0.00374435	1.69326	0.00120599
Succinate dehydrogenase [ubiquinone] flavoprotein subunit, mitochondrial	Sdha	NO	sp|Q8K2B3|SDHA_MOUSE Succinate dehydrogenase [ubiquinone] flavoprotein subunit, mitochondrial OS=Mus musculus OX=10090 GN=Sdha PE=1 SV=1	-0.150776	0.000290939	-0.0165159	0.486455	0.13426	0.049221	0.0651016	0.183481	8.58504e-05
45 kDa calcium-binding protein	Sdf4	NO	sp|Q61112|CAB45_MOUSE 45 kDa calcium-binding protein OS=Mus musculus OX=10090 GN=Sdf4 PE=1 SV=1	-0.0756595	0.101864	-0.198673	0.00171742	-0.123014	-1.01137	4.67007e-08	-1.13439	2.12759e-08
Stromal cell-derived factor 2-like protein 1	Sdf2l1	YES	sp|Q9ESP1|SDF2L_MOUSE Stromal cell-derived factor 2-like protein 1 OS=Mus musculus OX=10090 GN=Sdf2l1 PE=1 SV=2	0.00653236	0.87925	0.015481	0.719914	0.0089486	0.0644757	0.164245	0.0734243	0.120276
Stromal cell-derived factor 2	Sdf2	YES	tr|A0A0R4IZW9|A0A0R4IZW9_MOUSE Stromal cell-derived factor 2 OS=Mus musculus OX=10090 GN=Sdf2 PE=1 SV=1;sp|Q9DCT5|SDF2_MOUSE Stromal cell-derived factor 2 OS=Mus musculus OX=10090 GN=Sdf2 PE=1 SV=1	-0.19041	0.0256172	-0.043606	0.53731	0.146804	-0.0310828	0.65786	0.115721	0.129253
Syntenin-1	Sdcbp	YES	tr|Q3TMX0|Q3TMX0_MOUSE MCG4375, isoform CRA_b OS=Mus musculus OX=10090 GN=Sdcbp PE=1 SV=1;sp|O08992|SDCB1_MOUSE Syntenin-1 OS=Mus musculus OX=10090 GN=Sdcbp PE=1 SV=1;tr|H3BLG5|H3BLG5_MOUSE Syntenin-1 (Fragment) OS=Mus musculus OX=10090 GN=Sdcbp PE=1 SV=1	0.0347056	0.222873	0.102919	0.00552756	0.068213	-0.411651	1.07929e-06	-0.343438	3.64141e-06
Protein-associating with the carboxyl-terminal domain of ezrin	Scyl3	NO	sp|Q9DBQ7|PACE1_MOUSE Protein-associating with the carboxyl-terminal domain of ezrin OS=Mus musculus OX=10090 GN=Scyl3 PE=1 SV=3	-0.0686055	0.10163	-0.105374	0.0233629	-0.0367682	-0.187569	0.00136388	-0.224337	0.000482297
	Scyl2	YES	tr|G5E8J9|G5E8J9_MOUSE SCY1-like protein 2 OS=Mus musculus OX=10090 GN=Scyl2 PE=1 SV=1	-0.0243616	0.585831	0.0294822	0.511811	0.0538438	-0.176444	0.00448424	-0.1226	0.0241448
SCY1-like protein 2	Scyl2	YES	sp|Q8CFE4|SCYL2_MOUSE SCY1-like protein 2 OS=Mus musculus OX=10090 GN=Scyl2 PE=1 SV=1	0.0130872	0.75813	0.0260836	0.543666	0.0129964	-0.798426	2.64718e-07	-0.78543	2.9596e-07
N-terminal kinase-like protein	Scyl1	NO	sp|Q9EQC5|SCYL1_MOUSE N-terminal kinase-like protein OS=Mus musculus OX=10090 GN=Scyl1 PE=1 SV=1	-0.0881071	0.0185222	-0.0835517	0.0231418	0.00455546	-0.0680336	0.050376	-0.0634782	0.0635368
Secernin-3	Scrn3	YES	sp|Q3TMH2|SCRN3_MOUSE Secernin-3 OS=Mus musculus OX=10090 GN=Scrn3 PE=1 SV=1	0.317913	1.38032e-05	0.0835246	0.0251272	-0.234388	0.0316508	0.316802	-0.202737	0.000243054
Secernin-2	Scrn2	YES	sp|Q8VCA8|SCRN2_MOUSE Secernin-2 OS=Mus musculus OX=10090 GN=Scrn2 PE=1 SV=1	-0.0269187	0.497207	-0.110961	0.0216323	-0.0840419	0.0856497	0.0571563	0.0016078	0.967078
Secernin-1	Scrn1	NO	sp|Q9CZC8|SCRN1_MOUSE Secernin-1 OS=Mus musculus OX=10090 GN=Scrn1 PE=1 SV=1	-0.0727374	0.360841	0.0177978	0.817724	0.0905352	0.18088	0.045654	0.271415	0.00835438
Protein scribble homolog	Scrib	NO	sp|Q80U72|SCRIB_MOUSE Protein scribble homolog OS=Mus musculus OX=10090 GN=Scrib PE=1 SV=2	-0.0560011	0.197646	-0.09072	0.054752	-0.0347189	0.0287271	0.488741	-0.00599181	0.883151
Non-specific lipid-transfer protein	Scp2	NO	sp|P32020|NLTP_MOUSE Non-specific lipid-transfer protein OS=Mus musculus OX=10090 GN=Scp2 PE=1 SV=3	-0.0175512	0.770937	-0.0027527	0.963463	0.0147985	0.0632848	0.311484	0.0780833	0.220417
Short coiled-coil protein	Scoc	NO	sp|Q78YZ6|SCOC_MOUSE Short coiled-coil protein OS=Mus musculus OX=10090 GN=Scoc PE=1 SV=1	-0.0362847	0.760782	0.224616	0.0912513	0.260901	-0.475607	0.00440974	-0.214707	0.103574
Protein SCO2 homolog, mitochondrial	Sco2	NO	sp|Q8VCL2|SCO2_MOUSE Protein SCO2 homolog, mitochondrial OS=Mus musculus OX=10090 GN=Sco2 PE=1 SV=1	-0.0246639	0.756121	0.0228435	0.773495	0.0475073	0.333432	0.00338223	0.380939	0.00164255
Protein SCO1 homolog, mitochondrial	Sco1	YES	tr|Q5SUD5|Q5SUD5_MOUSE Protein SCO1 homolog, mitochondrial OS=Mus musculus OX=10090 GN=Sco1 PE=1 SV=1;sp|Q5SUC9|SCO1_MOUSE Protein SCO1 homolog, mitochondrial OS=Mus musculus OX=10090 GN=Sco1 PE=1 SV=1	0.0180756	0.783792	0.00570698	0.930786	-0.0123686	0.18561	0.0223733	0.173241	0.0295387
Selenocysteine lyase	Scly	NO	tr|A0A0R4J069|A0A0R4J069_MOUSE Selenocysteine lyase OS=Mus musculus OX=10090 GN=Scly PE=1 SV=1;sp|Q9JLI6|SCLY_MOUSE Selenocysteine lyase OS=Mus musculus OX=10090 GN=Scly PE=1 SV=1	0.167758	0.0195006	0.11633	0.0744917	-0.0514275	0.0278923	0.630396	-0.0235352	0.683981
	Schip1	YES	sp|P0DPB4|SCHI1_MOUSE Schwannomin-interacting protein 1 OS=Mus musculus OX=10090 GN=Schip1 PE=1 SV=1;sp|A0A088MLT8|IQIP1_MOUSE IQCJ-SCHIP1 readthrough transcript protein OS=Mus musculus OX=10090 GN=Iqcj-Schip1 PE=1 SV=2;tr|A0A0A6YXQ5|A0A0A6YXQ5_MOUSE Schwa	0.0744673	0.0855338	0.225782	0.000527599	0.151315	-0.981446	3.38168e-08	-0.830131	1.06248e-07
Sec1 family domain-containing protein 2	Scfd2	YES	sp|Q8BTY8|SCFD2_MOUSE Sec1 family domain-containing protein 2 OS=Mus musculus OX=10090 GN=Scfd2 PE=1 SV=1	-0.0538995	0.226677	0.024506	0.565552	0.0784054	0.0849875	0.0752285	0.163393	0.00518122
Sec1 family domain-containing protein 1	Scfd1	NO	sp|Q8BRF7|SCFD1_MOUSE Sec1 family domain-containing protein 1 OS=Mus musculus OX=10090 GN=Scfd1 PE=1 SV=1	-0.0732963	0.0416462	-0.0435374	0.18224	0.0297589	0.0215984	0.486183	0.0513573	0.124311
Saccharopine dehydrogenase-like oxidoreductase	Sccpdh	YES	sp|Q8R127|SCPDL_MOUSE Saccharopine dehydrogenase-like oxidoreductase OS=Mus musculus OX=10090 GN=Sccpdh PE=1 SV=1	-0.19023	0.0918063	-0.268366	0.0284487	-0.0781359	0.273143	0.0265202	0.195007	0.0854219
Scavenger receptor class F member 1	Scarf1	NO	sp|Q5ND28|SREC_MOUSE Scavenger receptor class F member 1 OS=Mus musculus OX=10090 GN=Scarf1 PE=1 SV=1;tr|B7ZC28|B7ZC28_MOUSE Scavenger receptor class F member 1 OS=Mus musculus OX=10090 GN=Scarf1 PE=1 SV=1	-0.0641071	0.0845056	-0.146152	0.00260144	-0.0820451	-0.0642281	0.0840359	-0.146273	0.00258988
Lysosome membrane protein 2	Scarb2	NO	sp|O35114|SCRB2_MOUSE Lysosome membrane protein 2 OS=Mus musculus OX=10090 GN=Scarb2 PE=1 SV=3	0.136575	0.0481037	0.103598	0.112365	-0.0329774	0.245307	0.00364994	0.212329	0.00756334
Scavenger receptor class B member 1	Scarb1	YES	sp|Q61009|SCRB1_MOUSE Scavenger receptor class B member 1 OS=Mus musculus OX=10090 GN=Scarb1 PE=1 SV=1	-0.0564353	0.365184	0.0180639	0.76556	0.0744992	-0.0612443	0.328329	0.0132549	0.826535
	Scaper	NO	tr|B2RXS3|B2RXS3_MOUSE S phase cyclin A-associated protein in the ER OS=Mus musculus OX=10090 GN=Scaper PE=1 SV=1;tr|F8VQ70|F8VQ70_MOUSE S phase cyclin A-associated protein in the ER OS=Mus musculus OX=10090 GN=Scaper PE=1 SV=1	0.122381	0.194679	0.0566202	0.527978	-0.0657606	-0.104828	0.258901	-0.170589	0.0859406
Secretory carrier-associated membrane protein 5	Scamp5	NO	sp|Q9JKD3|SCAM5_MOUSE Secretory carrier-associated membrane protein 5 OS=Mus musculus OX=10090 GN=Scamp5 PE=1 SV=1	0.0948752	0.138771	-0.0191652	0.745405	-0.11404	0.283504	0.00162752	0.169464	0.020582
Secretory carrier-associated membrane protein 4	Scamp4	NO	sp|Q9JKV5|SCAM4_MOUSE Secretory carrier-associated membrane protein 4 OS=Mus musculus OX=10090 GN=Scamp4 PE=1 SV=1	-0.0137448	0.740459	-0.029279	0.486753	-0.0155342	0.243642	0.000510401	0.228107	0.000752515
Secretory carrier-associated membrane protein 3	Scamp3	YES	tr|Q3UXS0|Q3UXS0_MOUSE Secretory carrier-associated membrane protein OS=Mus musculus OX=10090 GN=Scamp3 PE=1 SV=1;tr|E9Q855|E9Q855_MOUSE Secretory carrier-associated membrane protein OS=Mus musculus OX=10090 GN=Scamp3 PE=1 SV=1;sp|O35609|SCAM3_MOUSE Secret	-0.18214	0.000892442	-0.163351	0.00165584	0.0187891	-0.149341	0.00270401	-0.130552	0.00544397
Secretory carrier-associated membrane protein 2	Scamp2	NO	sp|Q9ERN0|SCAM2_MOUSE Secretory carrier-associated membrane protein 2 OS=Mus musculus OX=10090 GN=Scamp2 PE=1 SV=1	-0.232113	0.180508	-0.27615	0.120222	-0.0440371	-0.00131658	0.993498	-0.0453537	0.779554
[truncated: 4,374 more rows]
