# Supplementary material for: RNA translational regulation by CPEB4 orchestrates platelet function and pathophysiology
Source: Research Square preprint supplement (doi:10.21203/rs.3.rs-5588659/v1), 2025-01-15
Supplement: Supplementary file 4 [file e137390ad47315ca06c5a093.xlsx]

## Sheet: GO_CPEB_DE_KOvsWT activated
Term	Overlap	P_value	AdjP_value	Odds_Ratio	Combined Score	Genes	Regulation
Negative Regulation Of Membrane Protein Ectodomain Proteolysis (GO:0051045)	2/6	0.000164395	0.0124758	153.3	1335.74	TIMP2;TIMP3	UpRegulated
Negative Regulation Of Plasminogen Activation (GO:0010757)	2/6	0.000164395	0.0124758	153.3	1335.74	SERPINE2;SERPINF2	UpRegulated
Negative Regulation Of Hemostasis (GO:1900047)	2/10	0.000488934	0.0278285	76.6346	584.207	SERPINE2;TFPI	UpRegulated
Regulation Of Transforming Growth Factor Beta Production (GO:0071634)	3/16	1.95035e-05	0.00444029	71.8269	778.957	SERPINF2;FN1;LTBP1	UpRegulated
Fibrinolysis (GO:0042730)	2/12	0.000714007	0.0348333	61.3015	444.106	FGG;SERPINF2	UpRegulated
Negative Regulation Of Coagulation (GO:0050819)	2/12	0.000714007	0.0348333	61.3015	444.106	SERPINE2;TFPI	UpRegulated
Killing By Host Of Symbiont Cells (GO:0051873)	2/13	0.000842003	0.035943	55.7259	394.524	CFHR1;PF4	UpRegulated
Negative Regulation Of Smooth Muscle Cell Migration (GO:0014912)	2/14	0.000980215	0.0375571	51.0795	353.865	IGFBP5;IGFBP3	UpRegulated
Negative Regulation Of Blood Coagulation (GO:0030195)	4/30	2.95151e-06	0.00201588	48.6129	618.998	SERPINE2;FGG;SERPINF2;TFPI	UpRegulated
Negative Regulation Of Protein Processing (GO:0010955)	2/15	0.00112857	0.0405693	47.1479	319.984	SERPINE2;SERPINF2	UpRegulated
Regulation Of Plasminogen Activation (GO:0010755)	2/16	0.00128701	0.0439515	43.778	291.362	SERPINE2;SERPINF2	UpRegulated
Positive Regulation Of CREB Transcription Factor Activity (GO:0032793)	2/18	0.00163387	0.0478663	38.3019	245.776	RELN;RPS6KA5	UpRegulated
Regulation Of Insulin-Like Growth Factor Receptor Signaling Pathway (GO:0043567)	2/19	0.00182214	0.0478663	36.0471	227.376	IGFBP5;IGFBP3	UpRegulated
Regulation Of Smooth Muscle Cell Migration (GO:0014910)	2/19	0.00182214	0.0478663	36.0471	227.376	IGFBP5;IGFBP3	UpRegulated
Negative Regulation Of Proteolysis (GO:0045861)	3/41	0.000349687	0.0238836	24.5415	195.313	SERPINE2;TIMP2;TIMP3	UpRegulated
Negative Regulation Of Peptidase Activity (GO:0010466)	4/60	4.87e-05	0.00665242	22.5363	223.781	SERPINE2;SERPINF2;TIMP2;TIMP3	UpRegulated
Negative Regulation Of Endopeptidase Activity (GO:0010951)	4/66	7.09008e-05	0.00807087	20.3492	194.421	SERPINE2;SERPINF2;TIMP2;TIMP3	UpRegulated
Regulation Of Endopeptidase Activity (GO:0052548)	4/69	8.44066e-05	0.00823567	19.4071	182.036	SERPINE2;SERPINF2;TIMP2;TIMP3	UpRegulated
Regulation Of Smooth Muscle Cell Proliferation (GO:0048660)	3/54	0.000788772	0.0359154	18.2739	130.568	IGFBP5;IGFBP3;SERPINF2	UpRegulated
Negative Regulation Of Extrinsic Apoptotic Signaling Pathway (GO:2001237)	3/70	0.00167555	0.0478663	13.8988	88.8357	LGALS3;FGG;PF4	UpRegulated
Protein K48-linked Ubiquitination (GO:0070936)	3/70	0.00167555	0.0478663	13.8988	88.8357	RNF126;DTX3L;SYVN1	UpRegulated
Positive Regulation Of Cell-Substrate Adhesion (GO:0010811)	3/71	0.00174531	0.0478663	13.6937	86.9663	FGG;FN1;LIMS1	UpRegulated
Endosomal Transport (GO:0016197)	6/180	3.09495e-05	0.00528462	11.1696	115.976	SPAG9;RNF126;SNX18;ITSN1;WIPF3;DPY30	UpRegulated
Modification-Dependent Protein Catabolic Process (GO:0019941)	5/192	0.000461511	0.0278285	8.51561	65.4084	RNF126;DTX3L;SYVN1;RCHY1;MIB1	UpRegulated
Vesicle-Mediated Transport (GO:0016192)	9/411	8.92732e-06	0.00304868	7.53899	87.6512	SPAG9;SNX18;DTX3L;MYL1;ITSN1;WIPF3;DPY30;OCIAD2;MIB1	UpRegulated
Regulation Of Cell Population Proliferation (GO:0042127)	9/766	0.000989791	0.0375571	3.93076	27.1931	WWTR1;RNF126;RPS15A;IGFBP3;CLEC11A;FN1;XIAP;LIMS1;PF4	UpRegulated
