# Supplementary material for: RNA translational regulation by CPEB4 orchestrates platelet function and pathophysiology
Source: Research Square preprint supplement (doi:10.21203/rs.3.rs-5588659/v1), 2025-01-15
Supplement: Supplementary file 5 [file e24a6ec2264bc0c925d34356.xlsx]

## Sheet: DE_CPEB4 targets_Activated
SYMBOL	CPE prediction
Fgg	ACTIVATION
Cd47	ACTIVATION
Zxdc	REPRESSION
Dsg1c	REPRESSION
Xxylt1	REPRESSION
Adgrl3	ACTIVATION/REPRESSION
Brd4	ACTIVATION/REPRESSION
Pter	REPRESSION
Ric1	ACTIVATION/REPRESSION
Baz2a	ACTIVATION/REPRESSION
Lgals3	ACTIVATION
Lims1	ACTIVATION/REPRESSION
Prpf39	REPRESSION
Igfbp3	ACTIVATION
Fn1	REPRESSION
Rnf126	REPRESSION
Zbtb16	ACTIVATION
Apon	REPRESSION
Rps6ka5	REPRESSION
Cpn1	ACTIVATION
Igfbp5	REPRESSION
Atxn2l	ACTIVATION/REPRESSION		Pros1
Smim15	REPRESSION
Hspa1b	ACTIVATION/REPRESSION		Mrpl18
Rpl13a	ACTIVATION
Arid3a	ACTIVATION
Syvn1	ACTIVATION
Wipf3	ACTIVATION
Commd4	ACTIVATION
Mbnl2	REPRESSION
Reln	REPRESSION
Pf4	ACTIVATION
Nudt11	REPRESSION
Strbp	REPRESSION
Cd48	ACTIVATION
Fhl1	REPRESSION
Kctd13	ACTIVATION
Ttr	ACTIVATION
Spag9	REPRESSION
Sar1a	REPRESSION
Xiap	ACTIVATION/REPRESSION
Dtx3l	ACTIVATION/REPRESSION
Col1a1	ACTIVATION/REPRESSION
Slc30a5	ACTIVATION
Rhobtb3	ACTIVATION/REPRESSION
Tubgcp5	REPRESSION
Ltbp1	REPRESSION
Cfhr1	REPRESSION
Cfap20	ACTIVATION
Vwa5a	REPRESSION
Wwtr1	ACTIVATION/REPRESSION
Usp31	ACTIVATION/REPRESSION
Ganc	REPRESSION
Timp3	REPRESSION
Hnrnpu	REPRESSION
Leprotl1	REPRESSION
Slc35a3	ACTIVATION/REPRESSION
Arhgap18	REPRESSION
Slc29a1	ACTIVATION/REPRESSION
Mib1	ACTIVATION/REPRESSION
Apool	ACTIVATION
Dpy30	ACTIVATION/REPRESSION
Bptf	REPRESSION
Abi1	REPRESSION
Serpinf2	ACTIVATION
Raf1	ACTIVATION/REPRESSION
Ddx3y	REPRESSION
Slc35a1	ACTIVATION/REPRESSION
Rchy1	REPRESSION
Cln3	REPRESSION
Gypa	ACTIVATION/REPRESSION
Snx18	ACTIVATION/REPRESSION
Padi2	REPRESSION
Nfxl1	ACTIVATION/REPRESSION
Cp	REPRESSION
Gga2	REPRESSION
Dnlz	ACTIVATION
Rhag	ACTIVATION/REPRESSION
Clec11a	REPRESSION
Triqk	ACTIVATION
Pros1	ACTIVATION
Cd44	ACTIVATION/REPRESSION
Ociad2	REPRESSION
Myl1	ACTIVATION/REPRESSION
Cyld	ACTIVATION/REPRESSION
Exosc4	ACTIVATION
Mbnl1	ACTIVATION/REPRESSION
Timp2	ACTIVATION/REPRESSION
Rps15a	REPRESSION
Acp1	REPRESSION
Serpine2	ACTIVATION/REPRESSION
Prpf19	ACTIVATION/REPRESSION
Peg10	REPRESSION
Sbf2	REPRESSION
Mrps24	REPRESSION
Mrpl18	ACTIVATION
Rab11a	ACTIVATION/REPRESSION
Ipo8	ACTIVATION
Nudt13	REPRESSION
Add2	REPRESSION
Tanc1	REPRESSION
Gnpda1	ACTIVATION
